# Supplementary material for: MicroRNA expression changes in association with changes in interleukin-1ß/interleukin10 ratios produced by monocytes in autism spectrum disorders: their association with neuropsychiatric symptoms and comorbid conditions (observational study)
Source: J Neuroinflammation. 2017 Nov 25;14:229. doi: 10.1186/s12974-017-1003-6 (PMC5702092; doi:10.1186/s12974-017-1003-6)
Supplement: Supplementary file 3 — Results of Z test of miRNA expression between whole ASD cells and non-ASD control cells. (XLSX 261 kb) [file 12974_2017_1003_MOESM3_ESM.xlsx]

## Sheet: Sheet1
Gene ID	p-value	FC ([123] vs [Normal Control])	Log FC ([123] vs [Normal Control])	FC (abs) ([123] vs [Normal Control])	Regulation ([123] vs [Normal Control])	Accession	Entrez ID	Ensembl ID	Gene Type	DB Refs
NEWGENE2868	0	-1.28162	-0.357969	1.28162	down				miRNA			Z test: whole ASD monocytes vs. non-ASD control cells.
NEWGENE2867	2.22045e-16	1.05896	0.0826483	1.05896	up				miRNA
NEWGENE2870	0.047135	1.29236	0.37001	1.29236	up				miRNA				Entity List: All Genes
NEWGENE2869	0.0180894	1.26181	0.335495	1.26181	up				miRNA				Interpretation: 123vNL
NEWGENE2871	0	-1.2	-0.263039	1.2	down				snoRNA				Test: Z Test
NEWGENE2873	0.00942639	-1.0251	-0.0357617	1.0251	down				miRNA				Multiple Testing Correction: No Correction
NEWGENE2875	0	1.0006	0.000870757	1.0006	up				miRNA				Maximum pvalue cut-off: 0.05
MI0022558	0.000389603	-1.14701	-0.197873	1.14701	down	hsa-mir-6723			miRNA	miRBase:MI0022558
NEWGENE2877	2.44573e-09	-1.00711	-0.0102262	1.00711	down				miRNA
NEWGENE48	0.0162053	-1.07326	-0.102006	1.07326	down				Unknown
MI0000342	0.00411178	1.18361	0.243193	1.18361	up	hsa-mir-200b	406984	ENSG00000207730	miRNA	miRBase:MI0000342			Created from Advanced Analysis operation: Clustering:
MI0000737	0.00554266	1.18538	0.245344	1.18538	up	hsa-mir-200a	406983	ENSG00000207607	miRNA	miRBase:MI0000737			Entity List: no correction Z Test 123VNL
NEWGENE2883	0	-1.09385	-0.129411	1.09385	down				miRNA				Interpretation: 123vNL
NEWGENE51	0.00148494	1.27022	0.345074	1.27022	up				Unknown				Experiment: Created from 103017mirna alignment
NEWGENE57	1.79072e-08	-1.02643	-0.0376354	1.02643	down				Unknown				Clustering Algorithm: Hierarchical
NEWGENE59	9.35923e-10	1.52592	0.60968	1.52592	up				Unknown				Clustered By: Normalized intensity values
NEWGENE64	6.95075e-05	1.23352	0.302777	1.23352	up				Unknown				Clustered On: Entities and Conditions
NEWGENE66	0.00612025	-1.07198	-0.100273	1.07198	down				Unknown				Similarity Measure: Euclidean
ENSG00000207056	0.000568168	1.09821	0.135151	1.09821	up	RNU1-8P		ENSG00000207056	snRNA	RFAM:RF00003			Linkage Rule: Wards
ENSG00000243868	0	1.00997	0.0143145	1.00997	up	AL009183.1		ENSG00000243868	tRNA_pseudogene	RFAM:RF00005			Cluster Within Conditions: No
chr1.trna137	0	1.00997	0.0143145	1.00997	up	trna137			tRNA
NEWGENE71	1.02379e-10	-1.11375	-0.155431	1.11375	down				Unknown
ENSG00000200344	0.0104106	-1.02811	-0.04	1.02811	down	Y_RNA		ENSG00000200344	scRNA	RFAM:RF00019
NEWGENE72	0	-1.00586	-0.00842947	1.00586	down				Unknown
ENSG00000200975	0	1.31095	0.390616	1.31095	up	RNU1-7P		ENSG00000200975	snRNA	RFAM:RF00003
NEWGENE74	7.48581e-05	1.17627	0.234217	1.17627	up				Unknown
NEWGENE78	0.00499931	1.15083	0.202674	1.15083	up				Unknown
NEWGENE81	0.0156047	-1.16436	-0.219538	1.16436	down				Unknown
NEWGENE83	0.00108762	1.15005	0.201694	1.15005	up				Unknown
NEWGENE84	0	-1.16503	-0.220364	1.16503	down				Unknown
ENSG00000207213	0.0222199	1.16975	0.226205	1.16975	up	Y_RNA		ENSG00000207213	scRNA	RFAM:RF00019
NEWGENE85	0.0395756	1.19778	0.260364	1.19778	up				Unknown
ENSG00000199347	0.0226565	1.38369	0.468526	1.38369	up	RNU5E-1	26829	ENSG00000199347	snRNA	RFAM:RF00020
ENSG00000201801	8.16563e-06	1.36609	0.450057	1.36609	up	RNU5E-4P		ENSG00000201801	snRNA	RFAM:RF00020
MI0017259	0.0363472	-1.05512	-0.0774112	1.05512	down	hsa-mir-4632	100616438		miRNA	miRBase:MI0017259
NEWGENE2885	0	1.73786	0.797314	1.73786	up				tRNA
ENSG00000241848	0.0039235	1.02324	0.0331405	1.02324	up	AL031296.1		ENSG00000241848	scRNA_pseudogene
NEWGENE2886	0	1.20992	0.274915	1.20992	up				miRNA
NEWGENE2887	0.000599869	1.05237	0.0736359	1.05237	up				miRNA
chr1.trna136	0.0171771	1.08169	0.113293	1.08169	up	trna136			tRNA
chr1.trna133	0	1.10424	0.143052	1.10424	up	trna133			tRNA
chr1.trna131	0	-1.09976	-0.137189	1.09976	down	trna131			tRNA
chr1.trna2	5.11272e-09	-1.05673	-0.0796003	1.05673	down	trna2			tRNA
ENSG00000207389	2.02018e-08	2.02531	1.01814	2.02531	up	RNU1-4	26863|26865|26866|26869|26870|26871|6060	ENSG00000207389	snRNA	RFAM:RF00003
chr1.trna4	0	1.02118	0.0302335	1.02118	up	trna4			tRNA
chr1.trna5	0.0434851	-1.4326	-0.518635	1.4326	down	trna5			tRNA
chr1.trna7	0.000672886	1.14987	0.201465	1.14987	up	trna7			tRNA
ENSG00000207005	1.62274e-08	2.02496	1.0179	2.02496	up	RNU1-2	26863|26865|26866|26869|26870|26871|6060	ENSG00000207005	snRNA	RFAM:RF00003
NEWGENE2889	0.031067	-1.08057	-0.111796	1.08057	down				miRNA
NEWGENE95	2.22045e-16	-1.2975	-0.375729	1.2975	down				Unknown
NEWGENE96	2.19904e-05	1.20499	0.269022	1.20499	up				Unknown
NEWGENE98	0	-1.12958	-0.175788	1.12958	down				Unknown
NEWGENE99	0.023068	1.14367	0.193666	1.14367	up				Unknown
NEWGENE2890	0	1.71048	0.774399	1.71048	up				miRNA
NEWGENE102	1.78646e-06	-1.0285	-0.0405416	1.0285	down				Unknown
NEWGENE106	0.0189142	-1.16493	-0.220247	1.16493	down				Unknown
ENSG00000201405	0	1.08206	0.113784	1.08206	up	Y_RNA		ENSG00000201405	scRNA	RFAM:RF00019
NEWGENE111	3.13743e-06	1.49925	0.584236	1.49925	up				Unknown
NEWGENE2891	2.68215e-08	1.44717	0.533237	1.44717	up				tRNA
NEWGENE112	0.00647054	-1.18115	-0.240194	1.18115	down				Unknown
ENSG00000252802	0.00836312	1.09874	0.135855	1.09874	up	Y_RNA		ENSG00000252802	scRNA	RFAM:RF00019
NEWGENE115	0	1.20359	0.267341	1.20359	up				Unknown
ENSG00000252947	0.0176426	1.42911	0.515119	1.42911	up	SCARNA1	677774	ENSG00000252947	snoRNA	RFAM:RF00553
NEWGENE118	0.00768401	-1.09868	-0.135775	1.09868	down				Unknown
NEWGENE2892	0.0214852	1.11538	0.157529	1.11538	up				snoRNA
ENSG00000200087	0	1.35646	0.439849	1.35646	up	SNORA73B	26768|6081	ENSG00000200087	snoRNA	RFAM:RF00045
ENSG00000221539	0	1.49737	0.582432	1.49737	up	SNORD99	692212	ENSG00000221539	snoRNA	RFAM:RF00608
NEWGENE2893	5.25779e-11	1.50262	0.587476	1.50262	up				snoRNA
NEWGENE2894	4.88498e-15	1.2652	0.339367	1.2652	up				snoRNA
NEWGENE2896	9.277e-06	1.5076	0.592249	1.5076	up				snoRNA
NEWGENE2897	0.029236	1.10752	0.147331	1.10752	up				tRNA
NEWGENE129	0.000626564	1.15253	0.204802	1.15253	up				Unknown
NEWGENE2898	0.0350376	-1.11095	-0.151795	1.11095	down				miRNA
NEWGENE2899	4.54768e-07	1.10061	0.138306	1.10061	up				miRNA
ENSG00000200181	0.00219245	1.42001	0.5059	1.42001	up	SNORD85	692200	ENSG00000200181	snoRNA	RFAM:RF00188
ENSG00000206981	0.000321552	1.02996	0.0425888	1.02996	up	RNU6-40P		ENSG00000206981	snRNA	RFAM:RF00026
NEWGENE138	0	1.11148	0.152482	1.11148	up				Unknown
ENSG00000201448	0.00459363	1.14762	0.19865	1.14762	up	SNORA63		ENSG00000201448	snoRNA	RFAM:RF00092
NEWGENE2901	0.00742942	1.26047	0.33396	1.26047	up				tRNA
NEWGENE152	1.62058e-08	-1.13912	-0.187925	1.13912	down				Unknown
NEWGENE2902	2.89628e-05	-1.07104	-0.0990061	1.07104	down				miRNA
ENSG00000207356	0.0378765	-1	0	1	down	Y_RNA		ENSG00000207356	scRNA	RFAM:RF00019
NEWGENE2903	0.0185372	1.06549	0.091512	1.06549	up				miRNA
MI0000749	0	-1.19813	-0.26078	1.19813	down	hsa-mir-30e	407034		miRNA	miRBase:MI0000749
MI0000736	0	1.06571	0.0918175	1.06571	up	hsa-mir-30c-1	407031		miRNA	miRBase:MI0000736
NEWGENE169	4.54328e-06	-1.11691	-0.159511	1.11691	down				Unknown
NEWGENE173	0.000504472	-1.09969	-0.137092	1.09969	down				Unknown
NEWGENE2905	0.0288328	-1.0267	-0.0380079	1.0267	down				miRNA
ENSG00000199377	0.0186921	1.29085	0.36832	1.29085	up	RNU5F-1	26828	ENSG00000199377	snRNA	RFAM:RF00020
ENSG00000200169	0.0339186	1.2943	0.372176	1.2943	up	RNU5D-1	26830	ENSG00000200169	snRNA	RFAM:RF00020
ENSG00000264294	0	1.32874	0.410057	1.32874	up	SNORD55	26811	ENSG00000264294	snoRNA	RFAM:RF00157
ENSG00000200913	0	1.37047	0.454671	1.37047	up	SNORD46	94161	ENSG00000200913	snoRNA	RFAM:RF00218
ENSG00000207421	0	1.39479	0.480052	1.39479	up	SNORD38B		ENSG00000207421	snoRNA	RFAM:RF00212
NEWGENE2906	0.0248108	-1.08216	-0.11392	1.08216	down				miRNA
NEWGENE2907	0	1.18157	0.240706	1.18157	up				tRNA
NEWGENE2908	0.000434793	1.27634	0.352012	1.27634	up				miRNA
NEWGENE178	4.44549e-06	1.18537	0.245338	1.18537	up				Unknown
ENSG00000200262	0.0315717	1.00893	0.0128205	1.00893	up	Y_RNA		ENSG00000200262	scRNA	RFAM:RF00019
NEWGENE180	5.57039e-06	-1.13028	-0.176681	1.13028	down				Unknown
NEWGENE2910	2.07092e-08	1.05983	0.0838354	1.05983	up				miRNA
NEWGENE183	1.66529e-05	-1.17878	-0.237292	1.17878	down				Unknown
NEWGENE188	2.97953e-11	1.06107	0.0855255	1.06107	up				Unknown
NEWGENE189	0.00080245	1.04478	0.063197	1.04478	up				Unknown
NEWGENE2913	0	-1.25781	-0.330917	1.25781	down				miRNA
MI0000103	0	-1.07743	-0.107595	1.07743	down	hsa-mir-101-1	406893	ENSG00000199135	miRNA	miRBase:MI0000103
ENSG00000252433	0.00800167	1.06418	0.0897436	1.06418	up	SNORA31		ENSG00000252433	snoRNA	RFAM:RF00322
NEWGENE197	0.00143502	1.3408	0.423089	1.3408	up				Unknown
NEWGENE199	1.59456e-05	1.1515	0.203516	1.1515	up				Unknown
MI0000483	0	1.33253	0.414168	1.33253	up	hsa-mir-186	406962		miRNA	miRBase:MI0000483
NEWGENE201	7.47816e-07	1.16986	0.226341	1.16986	up				Unknown
NEWGENE202	2.23791e-10	1.31592	0.396072	1.31592	up				Unknown
NEWGENE2914	0.00269685	-1.25398	-0.326512	1.25398	down				miRNA
NEWGENE204	3.82592e-08	1.0639	0.0893614	1.0639	up				Unknown
ENSG00000206620	0	1.31958	0.40008	1.31958	up	SNORD45C	692085	ENSG00000206620	snoRNA	RFAM:RF00279
ENSG00000207241	0	1.10188	0.13997	1.10188	up	SNORD45A	26805	ENSG00000207241	snoRNA	RFAM:RF00279
ENSG00000201487	0	1.20846	0.273173	1.20846	up	SNORD45B	26804	ENSG00000201487	snoRNA	RFAM:RF00279
NEWGENE2916	1.49125e-12	1.19815	0.260813	1.19815	up				snoRNA
NEWGENE227	0	1.31283	0.392682	1.31283	up				Unknown
NEWGENE228	0.000145558	1.07714	0.107208	1.07714	up				Unknown
NEWGENE229	8.88178e-16	1.02113	0.030163	1.02113	up				Unknown
NEWGENE230	0.000549556	1.20126	0.26455	1.20126	up				Unknown
NEWGENE231	0.00045854	-1.14992	-0.201528	1.14992	down				Unknown
ENSG00000202385	0.0013342	1.18019	0.239024	1.18019	up	Y_RNA		ENSG00000202385	scRNA	RFAM:RF00019
NEWGENE2918	0	1.63263	0.7072	1.63263	up				miRNA
NEWGENE233	0.00243795	1.40496	0.490528	1.40496	up				Unknown
NEWGENE235	0.00272811	-1.14108	-0.190404	1.14108	down				Unknown
NEWGENE237	1.90031e-08	1.08913	0.123171	1.08913	up				Unknown
ENSG00000206680	0.000263105	1.31221	0.391999	1.31221	up	SNORD21	6083	ENSG00000206680	snoRNA	RFAM:RF00068
chr1.trna127	0.00926248	1.15693	0.210305	1.15693	up	trna127			tRNA
NEWGENE246	0	1.14235	0.192007	1.14235	up				Unknown
NEWGENE247	2.53131e-14	1.07894	0.109613	1.07894	up				Unknown
ENSG00000200800	0.00654213	1.01418	0.02032	1.01418	up	RNU1-130P		ENSG00000200800	snRNA	RFAM:RF00003
NEWGENE252	0.00221755	1.07613	0.105851	1.07613	up				Unknown
NEWGENE253	0.00950978	1.22294	0.290351	1.22294	up				Unknown
NEWGENE254	2.69784e-14	-1.10004	-0.13756	1.10004	down				Unknown
NEWGENE2919	0.000150688	1.01642	0.023499	1.01642	up				miRNA
NEWGENE255	2.57661e-12	1.32881	0.410137	1.32881	up				Unknown
NEWGENE257	0	1.05975	0.0837198	1.05975	up				Unknown
NEWGENE258	0.0338751	-1.10744	-0.147224	1.10744	down				Unknown
NEWGENE2920	5.89488e-05	1.32311	0.403937	1.32311	up				miRNA
NEWGENE2922	0.0398348	1.38851	0.47354	1.38851	up				tRNA
MI0000239	0.00050004	-1.24801	-0.319626	1.24801	down	hsa-mir-197	406974	ENSG00000207709	miRNA	miRBase:MI0000239
NEWGENE262	6.34915e-11	-1.1234	-0.167873	1.1234	down				Unknown
ENSG00000199710	0.00236371	1.02526	0.0359917	1.02526	up	Y_RNA		ENSG00000199710	scRNA	RFAM:RF00019
NEWGENE263	0.000105907	1.1323	0.179253	1.1323	up				Unknown
NEWGENE265	0.00287052	1.38552	0.47043	1.38552	up				Unknown
NEWGENE2923	8.35259e-05	1.08254	0.114421	1.08254	up				miRNA
NEWGENE268	0.0123753	-1.09535	-0.131395	1.09535	down				Unknown
NEWGENE271	0.0337128	1.12163	0.165596	1.12163	up				Unknown
NEWGENE273	0.00087853	-1.085	-0.117698	1.085	down				Unknown
NEWGENE2925	8.36913e-09	1.36547	0.449397	1.36547	up				miRNA
ENSG00000238603	0.0229414	1.09006	0.124409	1.09006	up	RNVU1-1	101954273	ENSG00000238603	snRNA	RFAM:RF00003
chr1.trna10	0.0108932	-1.05702	-0.08	1.05702	down	trna10			tRNA
ENSG00000222788	1.66434e-05	-1.08359	-0.115813	1.08359	down	RNU2-38P		ENSG00000222788	snRNA	RFAM:RF00004
NEWGENE2926	2.97274e-08	1.39029	0.475389	1.39029	up				miRNA
ENSG00000201558	0.0198344	1.13667	0.184815	1.13667	up	RNVU1-6	101954276	ENSG00000201558	snRNA	RFAM:RF00003
chr1.trna117	0.0343807	1.11341	0.154985	1.11341	up	trna117			tRNA
chr1.trna116	0	-1.69865	-0.76439	1.69865	down	trna116			tRNA
ENSG00000207418	0.0184445	1.0774	0.107557	1.0774	up	RNVU1-7	100312957|26864	ENSG00000207418	snRNA	RFAM:RF00003
chr1.trna16	0.033634	1.15699	0.210374	1.15699	up	trna16			tRNA
ENSG00000240560	0.0148116	1.06026	0.0844226	1.06026	up	TRNAE34P		ENSG00000240560	tRNA_pseudogene
chr1.trna17	0.0148116	1.06026	0.0844226	1.06026	up	trna17			tRNA
NEWGENE2927	0.000571681	1.10809	0.148073	1.10809	up				miRNA
ENSG00000206585	0.0184445	1.0774	0.107557	1.0774	up	RNVU1-9	100312957|26864	ENSG00000206585	snRNA	RFAM:RF00003
ENSG00000239606	0.0246445	-1.08113	-0.112544	1.08113	down	AL592207.1		ENSG00000239606	tRNA_pseudogene	RFAM:RF00005
ENSG00000241894	0.00321262	-1.12266	-0.166916	1.12266	down	AL592207.2		ENSG00000241894	tRNA_pseudogene
ENSG00000244591	0.0315717	-1	0	1	down	TRNAQ51P		ENSG00000244591	tRNA_pseudogene	RFAM:RF00005
chr1.trna23	0.0315717	-1	0	1	down	trna23			tRNA
NEWGENE275	0.0153189	-1.24948	-0.321333	1.24948	down				Unknown
ENSG00000207340	0.0229414	1.09006	0.124409	1.09006	up	RNVU1-10	101954273	ENSG00000207340	snRNA	RFAM:RF00003
chr1.trna24	0.0108932	-1.05702	-0.08	1.05702	down	trna24			tRNA
ENSG00000212456	0	1.71062	0.77452	1.71062	up	RNVU1-13		ENSG00000212456	snRNA	RFAM:RF00003
chr1.trna26	0	2.63738	1.39911	2.63738	up	trna26			tRNA
chr1.trna108	0	1.68107	0.749377	1.68107	up	trna108			tRNA
ENSG00000207205	0.000106452	1.41063	0.49634	1.41063	up	RNVU1-15	101954267	ENSG00000207205	snRNA	RFAM:RF00003
NEWGENE276	0.0172115	1.08071	0.111984	1.08071	up				Unknown
chr1.trna107	0	1.68107	0.749377	1.68107	up	trna107			tRNA
ENSG00000206968	0.00254324	1.22434	0.292004	1.22434	up	RNVU1-16	101954270	ENSG00000206968	snRNA	RFAM:RF00003
NEWGENE277	6.76456e-06	1.17105	0.227808	1.17105	up				Unknown
ENSG00000207349	8.54428e-13	1.33101	0.412517	1.33101	up	RNVU1-17	101954269	ENSG00000207349	snRNA	RFAM:RF00003
chr1.trna99	3.3835e-05	1.40161	0.48708	1.40161	up	trna99			tRNA
chr1.trna96	0.0400188	1.13276	0.179836	1.13276	up	trna96			tRNA
ENSG00000212544	0.00066987	1.43068	0.516701	1.43068	up	RNVU1-19	101954277	ENSG00000212544	snRNA	RFAM:RF00003
chr1.trna30	0.0108932	-1.05702	-0.08	1.05702	down	trna30			tRNA
chr1.trna95	0.0315717	-1	0	1	down	trna95			tRNA
NEWGENE278	0.000211008	-1.25842	-0.331614	1.25842	down				Unknown
chr1.trna94	0.00419194	-1.37381	-0.458178	1.37381	down	trna94			tRNA
ENSG00000240384	4.18073e-05	1.38077	0.46547	1.38077	up	TRNAG34P		ENSG00000240384	tRNA_pseudogene	RFAM:RF00005
chr1.trna91	4.18073e-05	1.38077	0.46547	1.38077	up	trna91			tRNA
chr1.trna90	2.25759e-06	1.33341	0.415123	1.33341	up	trna90			tRNA
ENSG00000222222	0.000168888	1.20922	0.274082	1.20922	up	RNU2-17P		ENSG00000222222	snRNA	RFAM:RF00004
ENSG00000253047	0.000327872	-1.07727	-0.107374	1.07727	down	SNORA40		ENSG00000253047	snoRNA	RFAM:RF00561
NEWGENE2931	0.0319172	1.14744	0.198419	1.14744	up				miRNA
NEWGENE280	7.85794e-11	-1.1917	-0.253023	1.1917	down				Unknown
NEWGENE2935	7.82707e-14	1.13008	0.176427	1.13008	up				tRNA
chr1.trna32	0	1.5389	0.621902	1.5389	up	trna32			tRNA
ENSG00000201129	0.0166881	1.28967	0.367007	1.28967	up	SNORA58		ENSG00000201129	snoRNA	RFAM:RF00418
MI0003560	0.00105351	-1.25401	-0.32655	1.25401	down	hsa-mir-92b	693235	ENSG00000271748	miRNA	miRBase:MI0003560
NEWGENE289	0.00200862	1.0939	0.129485	1.0939	up				Unknown
ENSG00000201614	0.0315717	1.00893	0.0128205	1.00893	up	RNU4-19P		ENSG00000201614	snRNA	RFAM:RF00015
ENSG00000207475	0	1.33535	0.417219	1.33535	up	SNORA42	677823	ENSG00000207475	snoRNA	RFAM:RF00406
MI0000466	3.63651e-06	1.04243	0.0599567	1.04243	up	hsa-mir-9-1	407046		miRNA	miRBase:MI0000466
ENSG00000206651	0	1.17215	0.229154	1.17215	up	Y_RNA		ENSG00000206651	scRNA	RFAM:RF00019
NEWGENE290	0.00881493	-1.11798	-0.160895	1.11798	down				Unknown
NEWGENE292	0.0024068	-1.07959	-0.110485	1.07959	down				Unknown
chr1.trna86	0.00606232	-1.16563	-0.221113	1.16563	down	trna86			tRNA
NEWGENE2943	0.00166995	1.14153	0.190971	1.14153	up				miRNA
NEWGENE299	5.61974e-08	-1.08722	-0.120646	1.08722	down				Unknown
chr1.trna85	0.0190973	-1.18411	-0.243799	1.18411	down	trna85			tRNA
chr1.trna83	2.72662e-05	1.20709	0.271528	1.20709	up	trna83			tRNA
NEWGENE484	1.26025e-07	-1.26323	-0.337118	1.26323	down				Unknown
chr1.trna81	1.88738e-15	1.06373	0.0891268	1.06373	up	trna81			tRNA
chr1.trna35	0	-1.01133	-0.0162543	1.01133	down	trna35			tRNA
chr1.trna79	0	1.74555	0.803685	1.74555	up	trna79			tRNA
chr1.trna78	1.88738e-15	1.06373	0.0891268	1.06373	up	trna78			tRNA
chr1.trna37	0	-1.01133	-0.0162543	1.01133	down	trna37			tRNA
chr1.trna76	0	1.74555	0.803685	1.74555	up	trna76			tRNA
chr1.trna75	1.88738e-15	1.06373	0.0891268	1.06373	up	trna75			tRNA
chr1.trna39	0	-1.01133	-0.0162543	1.01133	down	trna39			tRNA
chr1.trna73	0	1.74555	0.803685	1.74555	up	trna73			tRNA
chr1.trna72	1.88738e-15	1.06373	0.0891268	1.06373	up	trna72			tRNA
chr1.trna41	0	-1.01133	-0.0162543	1.01133	down	trna41			tRNA
chr1.trna70	0	1.74555	0.803685	1.74555	up	trna70			tRNA
chr1.trna69	1.88738e-15	1.06373	0.0891268	1.06373	up	trna69			tRNA
chr1.trna68	0.00249085	1.36713	0.451152	1.36713	up	trna68			tRNA
chr1.trna67	0.0107085	-1.02786	-0.0396411	1.02786	down	trna67			tRNA
chr1.trna45	0.00274726	1.20726	0.271739	1.20726	up	trna45			tRNA
chr1.trna46	1.11022e-15	-1.11735	-0.160086	1.11735	down	trna46			tRNA
chr1.trna47	0	1.84612	0.884497	1.84612	up	trna47			tRNA
chr1.trna66	0.000599701	1.05479	0.0769576	1.05479	up	trna66			tRNA
chr1.trna49	0.0449593	1.09821	0.135151	1.09821	up	trna49			tRNA
chr1.trna50	0.000207692	1.17362	0.230971	1.17362	up	trna50			tRNA
NEWGENE507	0.00010374	1.17048	0.227103	1.17048	up				Unknown
NEWGENE508	0.0217151	1.17152	0.228382	1.17152	up				Unknown
NEWGENE515	2.18158e-06	-1.13876	-0.187469	1.13876	down				Unknown
NEWGENE2944	0.000617927	1.08141	0.112915	1.08141	up				miRNA
ENSG00000206990	0.0254705	1.08786	0.121496	1.08786	up	Y_RNA		ENSG00000206990	scRNA	RFAM:RF00019
NEWGENE2945	0	1.28014	0.356306	1.28014	up				miRNA
chr1.trna52	0.00180061	-1.0165	-0.0236077	1.0165	down	trna52			tRNA
NEWGENE528	0.00667351	1.16633	0.221978	1.16633	up				Unknown
NEWGENE531	1.28713e-06	1.12416	0.168845	1.12416	up				Unknown
NEWGENE546	0.0240386	-1.05149	-0.0724403	1.05149	down				Unknown
NEWGENE550	0	1.62481	0.70027	1.62481	up				Unknown
NEWGENE555	0.0369113	-1.02192	-0.0312789	1.02192	down				Unknown
MI0000281	2.35367e-14	-1.07973	-0.110667	1.07973	down	hsa-mir-199a-2	406977	ENSG00000208024	miRNA	miRBase:MI0000281
chr1.trna64	0.0454985	-1.33778	-0.419844	1.33778	down	trna64			tRNA
NEWGENE2948	1.68536e-06	1.08139	0.112893	1.08139	up				miRNA
NEWGENE2949	2.51355e-13	1.03823	0.0541303	1.03823	up				miRNA
NEWGENE2950	0	1.40921	0.49489	1.40921	up				miRNA
NEWGENE2951	2.0958e-10	1.39829	0.48366	1.39829	up				tRNA
NEWGENE2952	2.90402e-05	1.06667	0.0931113	1.06667	up				snoRNA
NEWGENE2953	0.00110279	1.54525	0.627842	1.54525	up				snoRNA
ENSG00000208317	1.12778e-09	1.299	0.377406	1.299	up	SNORD78	692198	ENSG00000208317	snoRNA	RFAM:RF00592
NEWGENE2954	5.42882e-09	1.2552	0.327921	1.2552	up				snoRNA
NEWGENE2955	1.12833e-05	1.56159	0.643013	1.56159	up				tRNA
NEWGENE2956	0	1.26621	0.340517	1.26621	up				snoRNA
NEWGENE2957	0	1.22956	0.298146	1.22956	up				tRNA
NEWGENE2958	0.0182843	1.07432	0.10342	1.07432	up				snoRNA
NEWGENE682	0	-1.16275	-0.217545	1.16275	down				Unknown
NEWGENE683	6.59097e-06	-1.10217	-0.14035	1.10217	down				Unknown
ENSG00000252906	0.000851349	1.61951	0.695557	1.61951	up	SCARNA3	677679	ENSG00000252906	snoRNA	RFAM:RF00565
NEWGENE684	6.91733e-05	-1.14545	-0.19591	1.14545	down				Unknown
NEWGENE685	4.84436e-07	1.02033	0.0290402	1.02033	up				Unknown
ENSG00000201619	0.00377231	1.11819	0.161167	1.11819	up	SNORA67		ENSG00000201619	snoRNA	RFAM:RF00272
ENSG00000206905	8.12904e-05	-1.22078	-0.287799	1.22078	down	Y_RNA		ENSG00000206905	scRNA	RFAM:RF00019
ENSG00000272292	0.0317236	-1.02811	-0.04	1.02811	down	U6		ENSG00000272292	snRNA	RFAM:RF00026
NEWGENE2960	0.0257632	1.05636	0.0791016	1.05636	up				miRNA
NEWGENE688	0.000942899	-1.03418	-0.0484808	1.03418	down				Unknown
ENSG00000201421	0.0148201	1.04403	0.0621595	1.04403	up	Y_RNA		ENSG00000201421	scRNA	RFAM:RF00019
ENSG00000206640	0.0488629	1.01793	0.025641	1.01793	up	Y_RNA		ENSG00000206640	scRNA	RFAM:RF00019
ENSG00000252612	0.00631634	1.0948	0.13067	1.0948	up	Y_RNA		ENSG00000252612	scRNA	RFAM:RF00019
NEWGENE2963	0.000113616	1.196	0.258218	1.196	up				miRNA
NEWGENE698	0.000118704	-1.09696	-0.133506	1.09696	down				Unknown
NEWGENE699	0.00461961	1.27741	0.353225	1.27741	up				Unknown
NEWGENE702	0	-1.22386	-0.291444	1.22386	down				Unknown
NEWGENE708	0.000141797	1.38586	0.470784	1.38586	up				Unknown
MI0000270	7.28629e-10	1.16059	0.214863	1.16059	up	hsa-mir-181b-1	406955	ENSG00000207975	miRNA	miRBase:MI0000270|RFAM:RF00076
MI0000289	0	-1.08146	-0.112977	1.08146	down	hsa-mir-181a-1	406995	ENSG00000207759	miRNA	miRBase:MI0000289
NEWGENE712	6.66134e-16	-1.1278	-0.173506	1.1278	down				Unknown
NEWGENE713	0	-1.01055	-0.0151458	1.01055	down				Unknown
NEWGENE2965	0	-1.38884	-0.473876	1.38884	down				tRNA
NEWGENE716	0	-1.1663	-0.221938	1.1663	down				Unknown
ENSG00000221643	9.30367e-14	1.31781	0.398141	1.31781	up	SNORA77	677843	ENSG00000221643	snoRNA	RFAM:RF00599
NEWGENE2967	0	-1.1531	-0.205524	1.1531	down				miRNA
chr1.trna54	0.000445023	-1.07412	-0.103154	1.07412	down	trna54			tRNA
chr1.trna62	0.0361538	1.30547	0.384567	1.30547	up	trna62			tRNA
NEWGENE2968	0.0143327	1.00653	0.00939423	1.00653	up				tRNA
NEWGENE723	0.044474	-1.14975	-0.201324	1.14975	down				Unknown
chr1.trna55	0.000519959	1.06919	0.0965138	1.06919	up	trna55			tRNA
NEWGENE2969	0.0369706	1.10388	0.142585	1.10388	up				miRNA
NEWGENE725	1.75038e-12	-1.1156	-0.157826	1.1156	down				Unknown
MI0022706	0.0315717	1.01793	0.025641	1.01793	up	hsa-mir-6769b			miRNA	miRBase:MI0022706
NEWGENE729	1.77165e-05	-1.10012	-0.137665	1.10012	down				Unknown
NEWGENE736	0.00615467	1.03813	0.0539911	1.03813	up				Unknown
MI0000735	0	-1.01684	-0.0240967	1.01684	down	hsa-mir-29c	407026	ENSG00000207966	miRNA	miRBase:MI0000735
MI0000107	0	-1.00278	-0.00400624	1.00278	down	hsa-mir-29b-2	407025	ENSG00000207790	miRNA	miRBase:MI0000107|RFAM:RF00074
NEWGENE737	0.00470471	-1.06763	-0.0944156	1.06763	down				Unknown
NEWGENE738	0.0184121	-1.05881	-0.0824453	1.05881	down				Unknown
NEWGENE2971	0.0154317	1.02101	0.0299927	1.02101	up				tRNA
NEWGENE743	2.19736e-08	1.27347	0.348767	1.27347	up				Unknown
NEWGENE744	0	1.05698	0.0799434	1.05698	up				Unknown
NEWGENE745	0.0021855	-1.20107	-0.264323	1.20107	down				Unknown
NEWGENE746	0.0370583	1.12127	0.165134	1.12127	up				Unknown
NEWGENE747	0.00117012	1.11376	0.155443	1.11376	up				Unknown
NEWGENE748	1.27142e-06	1.0275	0.0391317	1.0275	up				Unknown
NEWGENE2973	2.46959e-07	1.2675	0.341984	1.2675	up				miRNA
NEWGENE749	0.0381171	1.2986	0.376956	1.2986	up				Unknown
NEWGENE2975	5.0599e-08	1.06111	0.0855695	1.06111	up				miRNA
MI0006442	0.0344296	1.02386	0.0340183	1.02386	up	hsa-mir-664a	100302234		miRNA	miRBase:MI0006442
ENSG00000222370	0.0307826	1.03959	0.0560099	1.03959	up	SNORA36B	100302234|677818	ENSG00000222370	snoRNA	RFAM:RF00340
NEWGENE750	7.44464e-05	1.18038	0.239254	1.18038	up				Unknown
NEWGENE751	0.0078233	1.06224	0.0871039	1.06224	up				Unknown
NEWGENE2978	0.00543013	-1.02911	-0.0413935	1.02911	down				miRNA
NEWGENE753	0.0101449	1.33693	0.418923	1.33693	up				Unknown
NEWGENE754	1.81315e-10	1.27137	0.34638	1.27137	up				Unknown
NEWGENE756	0.0443166	1.16794	0.223971	1.16794	up				Unknown
NEWGENE757	0.00218093	-1.02971	-0.0422423	1.02971	down				Unknown
NEWGENE758	0	-1.0621	-0.0869135	1.0621	down				Unknown
NEWGENE2979	0	-1.33629	-0.418231	1.33629	down				snoRNA
NEWGENE759	2.64417e-07	1.04148	0.0586326	1.04148	up				Unknown
NEWGENE760	1.70314e-07	-1.11924	-0.162518	1.11924	down				Unknown
NEWGENE762	2.22045e-16	1.78245	0.833859	1.78245	up				Unknown
NEWGENE761	0	1.93463	0.952058	1.93463	up				Unknown
NEWGENE763	0.0188788	-1.14151	-0.190947	1.14151	down				Unknown
ENSG00000212144	0.0245515	-1.02446	-0.0348702	1.02446	down	U8		ENSG00000212144	snoRNA	RFAM:RF00096
NEWGENE765	5.35016e-13	-1.11934	-0.162647	1.11934	down				Unknown
NEWGENE766	5.6145e-05	1.18926	0.250063	1.18926	up				Unknown
NEWGENE768	2.35939e-05	-1.35093	-0.433956	1.35093	down				Unknown
NEWGENE2981	0	-1.46548	-0.551378	1.46548	down				miRNA
NEWGENE769	0	1.70348	0.768483	1.70348	up				Unknown
MI0007258	0.0184644	1.11582	0.158099	1.11582	up	hsa-mir-1537	100302139	ENSG00000222831	miRNA	miRBase:MI0007258
ENSG00000252822	0.000174573	-1.44912	-0.53518	1.44912	down	Y_RNA		ENSG00000252822	scRNA	RFAM:RF00019
ENSG00000222650	0	1.19933	0.262226	1.19933	up	RNU2-70P		ENSG00000222650	snRNA	RFAM:RF00004
NEWGENE772	0	-1.3744	-0.458806	1.3744	down				Unknown
NEWGENE773	0.0214273	-1.25937	-0.332706	1.25937	down				Unknown
chr1.trna60	0	1.13969	0.188642	1.13969	up	trna60			tRNA
NEWGENE775	0.000685019	1.17991	0.238675	1.17991	up				Unknown
ENSG00000202041	0.0131311	-1	0	1	down	Y_RNA		ENSG00000202041	scRNA	RFAM:RF00019
ENSG00000252317	0.00248031	1.17633	0.234292	1.17633	up	Y_RNA		ENSG00000252317	scRNA	RFAM:RF00019
ENSG00000199241	0.000527411	1.02702	0.0384615	1.02702	up	Y_RNA		ENSG00000199241	scRNA	RFAM:RF00019
NEWGENE778	5.13542e-07	1.03023	0.0429661	1.03023	up				Unknown
NEWGENE782	0.00755319	1.0014	0.00202295	1.0014	up				Unknown
NEWGENE783	0.000330213	1.21806	0.284587	1.21806	up				Unknown
ENSG00000201170	0.000163803	1.09056	0.125063	1.09056	up	RNU1-132P		ENSG00000201170	snRNA	RFAM:RF00003
NEWGENE784	0.0236732	-1.067	-0.093557	1.067	down				Unknown
NEWGENE785	0	1.26485	0.338967	1.26485	up				Unknown
NEWGENE2983	0.0366273	1.16867	0.224866	1.16867	up				miRNA
ENSG00000199442	0.00654213	1.00893	0.0128205	1.00893	up	Y_RNA		ENSG00000199442	scRNA	RFAM:RF00019
NEWGENE790	9.02208e-08	-1.16638	-0.222033	1.16638	down				Unknown
chr1.trna58	0.000722649	1.093	0.128298	1.093	up	trna58			tRNA
chr1.trna59	0	-1.74652	-0.804483	1.74652	down	trna59			tRNA
NEWGENE1	1.11078e-11	1.14665	0.197426	1.14665	up				Unknown
NEWGENE2	2.22045e-16	1.40009	0.485524	1.40009	up				Unknown
NEWGENE2985	0.00614996	-1.18555	-0.24556	1.18555	down				miRNA
NEWGENE3	7.44464e-05	1.12451	0.169292	1.12451	up				Unknown
NEWGENE5	0	1.33422	0.415991	1.33422	up				Unknown
NEWGENE6	0.00388021	1.12406	0.168723	1.12406	up				Unknown
NEWGENE7	9.41342e-05	1.18358	0.243155	1.18358	up				Unknown
NEWGENE10	6.53851e-10	1.18267	0.242043	1.18267	up				Unknown
NEWGENE11	0.00222962	-1.14273	-0.192489	1.14273	down				Unknown
ENSG00000206633	0.00934652	1.23978	0.310082	1.23978	up	SNORA80B	100302743	ENSG00000206633	snoRNA	RFAM:RF00406
ENSG00000239899	0.0265883	-1.1752	-0.232905	1.1752	down	AC011994.1		ENSG00000239899	scRNA_pseudogene	RFAM:RF00017
NEWGENE13	3.60789e-09	1.11161	0.152652	1.11161	up				Unknown
NEWGENE14	0.00686357	1.06538	0.0913745	1.06538	up				Unknown
NEWGENE15	1.28876e-05	1.11077	0.15156	1.11077	up				Unknown
NEWGENE16	4.31351e-07	-1.18553	-0.245527	1.18553	down				Unknown
NEWGENE17	4.70513e-06	1.28013	0.35629	1.28013	up				Unknown
NEWGENE18	1.03473e-13	1.28846	0.365648	1.28846	up				Unknown
NEWGENE19	0.0063588	1.07866	0.109245	1.07866	up				Unknown
NEWGENE20	2.83416e-07	1.07429	0.103385	1.07429	up				Unknown
NEWGENE21	0.00940704	1.24517	0.316338	1.24517	up				Unknown
ENSG00000200829	0.0200623	1.04543	0.0641026	1.04543	up	Y_RNA		ENSG00000200829	scRNA	RFAM:RF00019
NEWGENE2987	0.000408321	-1.19122	-0.252441	1.19122	down				miRNA
NEWGENE28	3.03183e-08	1.54683	0.62931	1.54683	up				Unknown
NEWGENE27	0.00365061	1.17737	0.235567	1.17737	up				Unknown
NEWGENE29	0.0337128	1.03564	0.0505272	1.03564	up				Unknown
chr2.trna3	0.0120341	-1.23695	-0.306785	1.23695	down	trna3			tRNA
ENSG00000239301	0.0410295	1.11303	0.154492	1.11303	up	AC013403.1		ENSG00000239301	scRNA_pseudogene
NEWGENE2988	0	1.79214	0.841686	1.79214	up				miRNA
ENSG00000264994	0	1.29379	0.371604	1.29379	up	SNORD92	692209	ENSG00000264994	snoRNA	RFAM:RF00325
ENSG00000265145	0	1.25281	0.325165	1.25281	up	SNORD53	26796	ENSG00000265145	snoRNA	RFAM:RF00325
ENSG00000265706	0	1.33862	0.420747	1.33862	up	SNORD53_SNORD92		ENSG00000265706	snoRNA	RFAM:RF00325
NEWGENE2991	0	-1.21939	-0.286163	1.21939	down				miRNA
NEWGENE32	0.0440048	1.14762	0.198651	1.14762	up				Unknown
NEWGENE34	0	1.32418	0.405102	1.32418	up				Unknown
NEWGENE35	0.000435256	-1.09205	-0.127038	1.09205	down				Unknown
NEWGENE37	1.33227e-14	-1.20601	-0.270239	1.20601	down				Unknown
NEWGENE40	4.44089e-16	1.5254	0.609192	1.5254	up				Unknown
NEWGENE42	1.9349e-12	1.09415	0.12981	1.09415	up				Unknown
NEWGENE43	0.000384884	1.09875	0.13586	1.09875	up				Unknown
ENSG00000194270	0.0315717	-1	0	1	down	Y_RNA		ENSG00000194270	scRNA	RFAM:RF00019
NEWGENE2997	0.0314209	1.09804	0.13493	1.09804	up				snoRNA
NEWGENE52	0	2.06754	1.04792	2.06754	up				Unknown
NEWGENE53	1.68754e-13	1.06202	0.0868177	1.06202	up				Unknown
NEWGENE61	0.0262947	-1.08519	-0.117953	1.08519	down				Unknown
ENSG00000251942	0.000321552	1.01793	0.025641	1.01793	up	SCARNA16		ENSG00000251942	snoRNA	RFAM:RF00424
ENSG00000238756	0.0315717	1.01793	0.025641	1.01793	up	snoU13		ENSG00000238756	snoRNA	RFAM:RF01210
NEWGENE62	0	1.05531	0.0776681	1.05531	up				Unknown
NEWGENE68	5.64943e-11	-1.12803	-0.173806	1.12803	down				Unknown
NEWGENE77	0.000235342	1.22413	0.291759	1.22413	up				Unknown
NEWGENE80	0.00808044	1.27295	0.348175	1.27295	up				Unknown
NEWGENE3000	0	-1.3266	-0.407736	1.3266	down				miRNA
NEWGENE82	0.000319992	1.25864	0.33187	1.25864	up				Unknown
MI0025511	0	-1.50964	-0.594209	1.50964	down	hsa-mir-4433b			miRNA	miRBase:MI0025511
MI0016773	0.0262947	-1.12932	-0.175453	1.12932	down	hsa-mir-4433	100616265	ENSG00000264297	miRNA	miRBase:MI0016773
NEWGENE88	4.28227e-07	-1.0315	-0.0447499	1.0315	down				Unknown
NEWGENE90	5.02249e-07	1.22601	0.293969	1.22601	up				Unknown
NEWGENE3003	0.00657538	-1.06496	-0.0908053	1.06496	down				snoRNA
chr2.trna27	0	-1.19078	-0.251902	1.19078	down	trna27			tRNA
ENSG00000241159	0.0131311	-1	0	1	down	AC007040.1		ENSG00000241159	scRNA_pseudogene	RFAM:RF00017
ENSG00000222536	0.0109021	1.05088	0.0716021	1.05088	up	RNU2-39P		ENSG00000222536	snRNA	RFAM:RF00004
NEWGENE101	0.000102064	1.08431	0.116777	1.08431	up				Unknown
NEWGENE3004	1.56606e-10	-1.22318	-0.290635	1.22318	down				miRNA
NEWGENE3005	0	-1.15627	-0.209481	1.15627	down				miRNA
NEWGENE3006	0.00406924	1.09181	0.12672	1.09181	up				miRNA
NEWGENE109	0.000673529	-1.22247	-0.289801	1.22247	down				Unknown
NEWGENE110	6.24534e-07	1.0786	0.109164	1.0786	up				Unknown
NEWGENE3007	0.0443166	1.19223	0.253668	1.19223	up				tRNA
NEWGENE3009	0.000777939	-1.09537	-0.131417	1.09537	down				miRNA
NEWGENE114	0.00503516	1.18956	0.250423	1.18956	up				Unknown
NEWGENE3011	0.000176126	1.13804	0.186548	1.13804	up				miRNA
NEWGENE116	0.0369624	-1.11128	-0.152224	1.11128	down				Unknown
ENSG00000202382	0.00907316	-1.14097	-0.190258	1.14097	down	Y_RNA		ENSG00000202382	scRNA	RFAM:RF00019
ENSG00000207207	6.07329e-07	1.54032	0.623227	1.54032	up	Y_RNA		ENSG00000207207	scRNA	RFAM:RF00019
ENSG00000208772	0.000158148	1.22533	0.293169	1.22533	up	SNORD94	692225	ENSG00000208772	snoRNA	RFAM:RF00613
ENSG00000202537	0.00301273	1.07134	0.0994216	1.07134	up	U8		ENSG00000202537	snoRNA	RFAM:RF00096
NEWGENE120	0	1.0313	0.0444623	1.0313	up				Unknown
NEWGENE3016	4.07911e-08	1.36612	0.450088	1.36612	up				miRNA
NEWGENE121	0.000371918	1.13745	0.185806	1.13745	up				Unknown
ENSG00000201806	0.0270873	1.03775	0.0534606	1.03775	up	RNU4-8P		ENSG00000201806	snRNA	RFAM:RF00015
NEWGENE123	0.000273935	1.13105	0.17766	1.13105	up				Unknown
NEWGENE125	0.0295629	1.41484	0.500636	1.41484	up				Unknown
NEWGENE126	0	-1.61203	-0.688876	1.61203	down				Unknown
ENSG00000212283	0	-1.01508	-0.0215985	1.01508	down	SNORD89	692205	ENSG00000212283	snoRNA	RFAM:RF00578
NEWGENE127	4.63362e-06	1.08421	0.116648	1.08421	up				Unknown
NEWGENE128	0.0016256	1.20349	0.267225	1.20349	up				Unknown
NEWGENE130	6.60805e-12	1.1174	0.160152	1.1174	up				Unknown
NEWGENE3020	0	-1.07401	-0.103002	1.07401	down				tRNA
NEWGENE131	2.60236e-13	-1.10597	-0.145318	1.10597	down				Unknown
NEWGENE132	0	1.2391	0.309288	1.2391	up				Unknown
NEWGENE3021	5.29321e-05	-1.08609	-0.119147	1.08609	down				miRNA
NEWGENE133	0.0273063	-1.00291	-0.00419533	1.00291	down				Unknown
NEWGENE135	2.85123e-06	1.11317	0.154669	1.11317	up				Unknown
NEWGENE3022	6.77547e-12	-1.29832	-0.376643	1.29832	down				miRNA
NEWGENE145	0	-1.26507	-0.339213	1.26507	down				Unknown
NEWGENE146	1.44423e-10	-1.12559	-0.170681	1.12559	down				Unknown
NEWGENE147	0.0378402	-1.11976	-0.163187	1.11976	down				Unknown
NEWGENE150	0	1.05264	0.0740124	1.05264	up				Unknown
NEWGENE153	0.00307766	-1.11189	-0.153019	1.11189	down				Unknown
NEWGENE3024	3.22492e-05	1.11245	0.153738	1.11245	up				miRNA
NEWGENE3025	0.00406924	1.0753	0.104743	1.0753	up				miRNA
NEWGENE3027	0.00459363	1.1365	0.184599	1.1365	up				miRNA
NEWGENE3029	0.0045606	1.14223	0.191858	1.14223	up				miRNA
ENSG00000202427	0.0315717	1.01418	0.02032	1.01418	up	RNU6-744P		ENSG00000202427	snRNA	RFAM:RF00026
NEWGENE154	0.0487206	-1.07996	-0.110971	1.07996	down				Unknown
NEWGENE155	0.000191797	1.28684	0.36383	1.28684	up				Unknown
NEWGENE157	0	2.27898	1.18839	2.27898	up				Unknown
NEWGENE158	3.47682e-11	-1.14743	-0.1984	1.14743	down				Unknown
NEWGENE159	9.80043e-08	1.17473	0.232323	1.17473	up				Unknown
NEWGENE3032	3.00874e-05	1.10752	0.147331	1.10752	up				miRNA
NEWGENE3033	1.08358e-13	-1.33366	-0.415394	1.33366	down				tRNA
NEWGENE162	0	1.78707	0.837599	1.78707	up				Unknown
NEWGENE164	0	-1.00502	-0.00722629	1.00502	down				Unknown
ENSG00000264229	2.22315e-06	1.51329	0.597692	1.51329	up	RNU4ATAC	100151683	ENSG00000264229	snRNA	RFAM:RF00618
NEWGENE3034	0.0118874	1.06418	0.0897436	1.06418	up				miRNA
NEWGENE166	0.037389	1.09768	0.134458	1.09768	up				Unknown
NEWGENE168	0.00664724	-1.03358	-0.0476517	1.03358	down				Unknown
NEWGENE283	0.0311425	-1.09323	-0.128594	1.09323	down				Unknown
NEWGENE3035	0	-1.42091	-0.506819	1.42091	down				snoRNA
NEWGENE286	2.54315e-05	1.31756	0.397867	1.31756	up				Unknown
NEWGENE287	0.00694541	-1.08036	-0.111516	1.08036	down				Unknown
NEWGENE288	0.000182989	1.20738	0.271877	1.20738	up				Unknown
NEWGENE291	2.76765e-07	-1.20074	-0.263923	1.20074	down				Unknown
chr2.trna20	0	-1.44313	-0.529205	1.44313	down	trna20			tRNA
NEWGENE295	0.00325736	1.05508	0.077358	1.05508	up				Unknown
NEWGENE296	5.25026e-06	-1.16314	-0.218025	1.16314	down				Unknown
NEWGENE297	0.0154551	-1.27783	-0.353694	1.27783	down				Unknown
chr2.trna11	2.36273e-09	1.50315	0.587987	1.50315	up	trna11			tRNA
NEWGENE3038	2.86806e-07	1.14544	0.195904	1.14544	up				snoRNA
NEWGENE3039	0	1.23891	0.309068	1.23891	up				miRNA
NEWGENE3040	8.61533e-14	1.52416	0.608013	1.52416	up				miRNA
NEWGENE3041	3.57078e-07	1.32181	0.40252	1.32181	up				miRNA
NEWGENE304	0.00992495	1.21973	0.286567	1.21973	up				Unknown
NEWGENE3042	0.00813238	1.37154	0.455796	1.37154	up				tRNA
NEWGENE3043	2.72375e-05	1.4124	0.498149	1.4124	up				tRNA
NEWGENE3044	0.0013382	-1.04432	-0.0625603	1.04432	down				snoRNA
NEWGENE3045	0	1.54641	0.628918	1.54641	up				tRNA
NEWGENE3046	1.55992e-05	-1.09904	-0.136244	1.09904	down				miRNA
NEWGENE3047	0.000154729	1.34993	0.432883	1.34993	up				miRNA
NEWGENE317	0.000222229	1.11948	0.162826	1.11948	up				Unknown
ENSG00000208308	3.38768e-05	1.03857	0.0545983	1.03857	up	SNORA40		ENSG00000208308	snoRNA	RFAM:RF00561
MI0000447	0.000558692	1.00554	0.00797056	1.00554	up	hsa-mir-128-1	406915		miRNA	miRBase:MI0000447
NEWGENE320	1.24656e-06	-1.09531	-0.131341	1.09531	down				Unknown
NEWGENE321	0.00156526	1.19499	0.257004	1.19499	up				Unknown
NEWGENE3049	0	-1.45629	-0.542293	1.45629	down				miRNA
NEWGENE3050	3.85456e-08	1.22544	0.293296	1.22544	up				miRNA
ENSG00000200287	0.000321552	1.03237	0.0459611	1.03237	up	Y_RNA		ENSG00000200287	scRNA	RFAM:RF00019
NEWGENE326	3.21542e-06	1.06857	0.0956762	1.06857	up				Unknown
NEWGENE327	1.44582e-06	1.0826	0.114497	1.0826	up				Unknown
NEWGENE328	1.34077e-10	-1.15282	-0.205163	1.15282	down				Unknown
NEWGENE333	0.0272136	1.1325	0.17951	1.1325	up				Unknown
NEWGENE3051	0.0104247	1.26179	0.335476	1.26179	up				snoRNA
NEWGENE334	0.00318381	-1.08227	-0.11406	1.08227	down				Unknown
uc021vqs.2	0.00258318	1.40619	0.491791	1.40619	up	piR-31637			piRNA	JB137817
NEWGENE371	6.67395e-07	1.18543	0.245413	1.18543	up				Unknown
NEWGENE376	7.36268e-10	1.41889	0.504763	1.41889	up				Unknown
NEWGENE380	0.0128931	1.11804	0.160975	1.11804	up				Unknown
NEWGENE3052	0.00605541	-1.11951	-0.162872	1.11951	down				miRNA
NEWGENE390	1.3522e-06	1.11619	0.158585	1.11619	up				Unknown
chr2.trna13	0	-1.31663	-0.396852	1.31663	down	trna13			tRNA
chr2.trna19	0.00347744	-1.03527	-0.0500088	1.03527	down	trna19			tRNA
NEWGENE405	4.21003e-09	1.52457	0.608401	1.52457	up				Unknown
ENSG00000240858	0.0102677	-1.15416	-0.20684	1.15416	down	TRNAE36P		ENSG00000240858	tRNA_pseudogene
chr2.trna18	0.0102677	-1.15416	-0.20684	1.15416	down	trna18			tRNA
NEWGENE411	0	-1.45261	-0.538646	1.45261	down				Unknown
NEWGENE414	0.00411927	1.09794	0.134798	1.09794	up				Unknown
NEWGENE3053	0	1.62811	0.703202	1.62811	up				miRNA
NEWGENE421	0	-1.14489	-0.195212	1.14489	down				Unknown
NEWGENE423	0.0003344	-1.24693	-0.318376	1.24693	down				Unknown
NEWGENE424	1.08089e-07	-1.24552	-0.316753	1.24552	down				Unknown
NEWGENE433	0.000282988	1.21862	0.285251	1.21862	up				Unknown
ENSG00000222509	6.47093e-10	1.54779	0.630208	1.54779	up	Y_RNA		ENSG00000222509	scRNA	RFAM:RF00019
NEWGENE442	9.24493e-08	1.18642	0.24662	1.18642	up				Unknown
NEWGENE444	0.0287623	1.17234	0.229396	1.17234	up				Unknown
ENSG00000201088	0.00173799	-1.00952	-0.0136699	1.00952	down	Y_RNA		ENSG00000201088	scRNA	RFAM:RF00019
ENSG00000206965	0.0176448	-1.02811	-0.04	1.02811	down	RNU6-5P	101954271|26826|26827	ENSG00000206965	snRNA	RFAM:RF00026
NEWGENE453	5.47384e-12	1.22034	0.287288	1.22034	up				Unknown
ENSG00000200121	0.0110694	-1.14487	-0.195178	1.14487	down	Y_RNA		ENSG00000200121	scRNA	RFAM:RF00019
MI0000267	0.00142936	-1	0	1	down	hsa-mir-10b	406903	ENSG00000207744	miRNA	miRBase:MI0000267|RFAM:RF00104
NEWGENE460	0.0135097	1.01608	0.0230187	1.01608	up				Unknown
NEWGENE462	2.2047e-05	-1.20615	-0.270411	1.20615	down				Unknown
NEWGENE467	4.44089e-16	1.4048	0.490368	1.4048	up				Unknown
NEWGENE468	0	1.0561	0.0787447	1.0561	up				Unknown
NEWGENE469	0.000152387	1.28875	0.365972	1.28875	up				Unknown
NEWGENE472	0.0056209	1.12743	0.173041	1.12743	up				Unknown
NEWGENE479	7.5806e-12	-1.14291	-0.192716	1.14291	down				Unknown
NEWGENE3056	0.00658397	-1.0619	-0.0866532	1.0619	down				miRNA
NEWGENE485	5.38439e-07	-1.04358	-0.0615395	1.04358	down				Unknown
NEWGENE3057	0.000463495	1.25558	0.32835	1.25558	up				miRNA
NEWGENE493	0	1.18915	0.249932	1.18915	up				Unknown
NEWGENE3058	0.0335255	1.16989	0.22637	1.16989	up				miRNA
NEWGENE494	0.036634	-1.05615	-0.078811	1.05615	down				Unknown
NEWGENE497	0.0346206	-1.14101	-0.190313	1.14101	down				Unknown
NEWGENE498	0.00930638	1.10917	0.14948	1.10917	up				Unknown
NEWGENE504	0	1.72741	0.788611	1.72741	up				Unknown
NEWGENE506	0.000315133	1.00821	0.0117992	1.00821	up				Unknown
NEWGENE510	3.70026e-08	-1.04271	-0.0603366	1.04271	down				Unknown
NEWGENE513	0.000101176	1.20776	0.272329	1.20776	up				Unknown
NEWGENE3059	0.0267631	1.22648	0.294519	1.22648	up				miRNA
NEWGENE3061	1.53301e-07	2.0217	1.01557	2.0217	up				miRNA
ENSG00000242746	0	1.14918	0.200603	1.14918	up	AC073043.1		ENSG00000242746	scRNA_pseudogene
NEWGENE534	0.00610774	-1.18929	-0.250098	1.18929	down				Unknown
ENSG00000252759	7.58282e-14	-1.2146	-0.280479	1.2146	down	Y_RNA		ENSG00000252759	scRNA	RFAM:RF00019
NEWGENE3062	0.00621993	1.22795	0.29625	1.22795	up				miRNA
ENSG00000202008	0	-1.11473	-0.1567	1.11473	down	Y_RNA		ENSG00000202008	scRNA	RFAM:RF00019
ENSG00000212534	8.18601e-10	1.17379	0.231177	1.17379	up	SNORD70	692110	ENSG00000212534	snoRNA	RFAM:RF00575
ENSG00000238317	4.59595e-08	1.4887	0.574049	1.4887	up	SNORD11	692058	ENSG00000238317	snoRNA	RFAM:RF01182
NEWGENE3063	2.31148e-13	1.78997	0.839935	1.78997	up				miRNA
ENSG00000241885	0	1.00319	0.00460187	1.00319	up	TRNAE40P		ENSG00000241885	tRNA_pseudogene	RFAM:RF00005
chr2.trna17	0	1.00319	0.00460187	1.00319	up	trna17			tRNA
NEWGENE571	1.02932e-10	-1.12472	-0.169561	1.12472	down				Unknown
ENSG00000241748	0	-1.37125	-0.455494	1.37125	down	AC007465.1		ENSG00000241748	tRNA_pseudogene
ENSG00000207047	0	1.48951	0.574841	1.48951	up	SNORD51	26798	ENSG00000207047	snoRNA	RFAM:RF00280
ENSG00000207406	0	1.56982	0.6506	1.56982	up	SNORA41	619569	ENSG00000207406	snoRNA	RFAM:RF00403
NEWGENE581	0	-1.12007	-0.163584	1.12007	down				Unknown
NEWGENE586	1.20987e-10	-1.11712	-0.159787	1.11712	down				Unknown
NEWGENE614	0.00541535	1.20385	0.267659	1.20385	up				Unknown
NEWGENE617	0	-1.00907	-0.0130284	1.00907	down				Unknown
NEWGENE620	0.00697069	-1.04026	-0.0569421	1.04026	down				Unknown
NEWGENE623	0.0340025	-1.09722	-0.133851	1.09722	down				Unknown
NEWGENE624	0	1.03214	0.0456316	1.03214	up				Unknown
NEWGENE625	1.52719e-08	-1.11278	-0.154174	1.11278	down				Unknown
MI0000084	2.66454e-15	-1.05522	-0.0775436	1.05522	down	hsa-mir-26b	407017		miRNA	miRBase:MI0000084
NEWGENE639	0.000474373	1.32652	0.407644	1.32652	up				Unknown
ENSG00000243907	4.01145e-06	1.06187	0.0866011	1.06187	up	AC093806.1		ENSG00000243907	tRNA_pseudogene
NEWGENE3069	0	1.18276	0.242155	1.18276	up				miRNA
NEWGENE649	4.45232e-08	-1.15888	-0.212732	1.15888	down				Unknown
NEWGENE650	0.0137065	-1.06409	-0.0896139	1.06409	down				Unknown
NEWGENE652	1.57518e-12	1.332	0.413598	1.332	up				Unknown
NEWGENE3070	0.000363653	1.13014	0.176497	1.13014	up				miRNA
NEWGENE3071	6.54956e-11	1.10244	0.140701	1.10244	up				miRNA
ENSG00000206885	0.000706054	1.47479	0.560508	1.47479	up	SNORA75	654321	ENSG00000206885	snoRNA	RFAM:RF00072
ENSG00000207280	0	1.8787	0.909738	1.8787	up	SNORD20	6082	ENSG00000207280	snoRNA	RFAM:RF00217
ENSG00000202400	0.00240604	1.3743	0.4587	1.3743	up	SNORD82	25826	ENSG00000202400	snoRNA	RFAM:RF00158
NEWGENE666	3.05083e-07	1.18607	0.24619	1.18607	up				Unknown
ENSG00000223198	0.0200623	1.05477	0.0769231	1.05477	up	RNU2-22P		ENSG00000223198	snRNA	RFAM:RF00004
NEWGENE3072	3.25886e-05	-1.14303	-0.192858	1.14303	down				miRNA
ENSG00000199781	0.0356748	-1.10949	-0.149896	1.10949	down	Y_RNA		ENSG00000199781	scRNA	RFAM:RF00019
ENSG00000252010	0.00198239	1.2972	0.375405	1.2972	up	SCARNA5	677775	ENSG00000252010	snoRNA	RFAM:RF00478
NEWGENE3073	0.00235814	-1.29364	-0.371433	1.29364	down				miRNA
NEWGENE671	8.3048e-05	-1.09271	-0.127914	1.09271	down				Unknown
NEWGENE672	1.76751e-06	1.18272	0.242105	1.18272	up				Unknown
NEWGENE673	0.0399353	1.32289	0.403691	1.32289	up				Unknown
NEWGENE3074	4.1741e-07	1.13479	0.182422	1.13479	up				tRNA
NEWGENE3075	1.74029e-06	-1.06109	-0.0855521	1.06109	down				miRNA
NEWGENE675	6.48616e-07	1.10463	0.143562	1.10463	up				Unknown
NEWGENE677	0.0121415	1.17891	0.237451	1.17891	up				Unknown
NEWGENE181	0.000240593	1.27965	0.355752	1.27965	up				Unknown
NEWGENE182	0	1.12787	0.173595	1.12787	up				Unknown
NEWGENE184	3.28397e-08	-1.67532	-0.74444	1.67532	down				Unknown
NEWGENE187	0.00583227	-1.13941	-0.18829	1.13941	down				Unknown
NEWGENE192	0	1.34093	0.423234	1.34093	up				Unknown
NEWGENE3076	0.00137083	1.14711	0.198001	1.14711	up				miRNA
NEWGENE194	0.024392	1.13353	0.180819	1.13353	up				Unknown
MI0005560	0.0109696	-1	0	1	down	hsa-mir-885	100126334		miRNA	miRBase:MI0005560
ENSG00000207496	0	1.47418	0.559909	1.47418	up	SNORA7A	619563	ENSG00000207496	snoRNA	RFAM:RF00409
NEWGENE196	0.00768632	-1.12218	-0.16631	1.12218	down				Unknown
NEWGENE198	2.43321e-05	1.22599	0.29395	1.22599	up				Unknown
NEWGENE203	0	1.2302	0.298889	1.2302	up				Unknown
NEWGENE206	5.94247e-12	-1.0492	-0.0692932	1.0492	down				Unknown
NEWGENE207	1.13458e-09	-1.18624	-0.246399	1.18624	down				Unknown
NEWGENE208	6.61693e-14	1.30028	0.37882	1.30028	up				Unknown
NEWGENE209	0.0400865	-1.11625	-0.158655	1.11625	down				Unknown
NEWGENE3078	0	1.08835	0.122147	1.08835	up				miRNA
NEWGENE211	0.00193433	1.15268	0.20499	1.15268	up				Unknown
NEWGENE212	0.00635281	-1.1759	-0.233768	1.1759	down				Unknown
NEWGENE213	1.1599e-05	1.04878	0.0687169	1.04878	up				Unknown
NEWGENE214	0.0225591	-1.10868	-0.148844	1.10868	down				Unknown
NEWGENE215	1.84765e-08	1.14155	0.190999	1.14155	up				Unknown
NEWGENE216	0.000440154	1.10991	0.150438	1.10991	up				Unknown
NEWGENE217	0.00259304	1.16169	0.216223	1.16169	up				Unknown
NEWGENE218	9.56656e-10	1.38568	0.470596	1.38568	up				Unknown
NEWGENE219	4.96493e-07	-1.30479	-0.383813	1.30479	down				Unknown
NEWGENE222	0.00632377	-1.11616	-0.158546	1.11616	down				Unknown
NEWGENE223	0	-1.42834	-0.514337	1.42834	down				Unknown
NEWGENE224	5.72178e-11	-1.04101	-0.0579858	1.04101	down				Unknown
MI0000727	0.000112535	1.0776	0.107821	1.0776	up	hsa-mir-128-2	406916		miRNA	miRBase:MI0000727
NEWGENE232	0.0107941	1.0775	0.107691	1.0775	up				Unknown
NEWGENE234	0.00718211	-1.11872	-0.161853	1.11872	down				Unknown
NEWGENE236	0.00752033	-1.06582	-0.0919704	1.06582	down				Unknown
ENSG00000202363	0.00646415	1.21648	0.282714	1.21648	up	SNORA62		ENSG00000202363	snoRNA	RFAM:RF00091
NEWGENE3082	0.0192159	1.22136	0.288489	1.22136	up				miRNA
NEWGENE3084	2.53478e-09	1.1114	0.152378	1.1114	up				miRNA
ENSG00000251811	0.000857382	1.06236	0.0872738	1.06236	up	Y_RNA		ENSG00000251811	scRNA	RFAM:RF00019
ENSG00000239128	5.25201e-06	1.23662	0.306399	1.23662	up	snoU13		ENSG00000239128	snoRNA	RFAM:RF01210
NEWGENE244	0.000469411	1.19528	0.257352	1.19528	up				Unknown
MI0016786	0.0031146	1.06491	0.0907284	1.06491	up	hsa-mir-4443	100616407	ENSG00000265483	miRNA	miRBase:MI0016786
NEWGENE248	9.99201e-15	1.09889	0.136043	1.09889	up				Unknown
MI0001448	0.000476204	-1.28938	-0.366674	1.28938	down	hsa-mir-425	494337	ENSG00000199032	miRNA	miRBase:MI0001448
MI0000465	7.02421e-06	1.07627	0.106035	1.07627	up	hsa-mir-191	406966	ENSG00000207605	miRNA	miRBase:MI0000465
ENSG00000244496	0.00814358	-1.15941	-0.213386	1.15941	down	AC121247.1		ENSG00000244496	scRNA_pseudogene
NEWGENE293	0.00940704	1.10463	0.143566	1.10463	up				Unknown
NEWGENE300	2.92829e-08	-1.11483	-0.156827	1.11483	down				Unknown
MI0000433	0	1.16192	0.21651	1.16192	up	hsa-let-7g	406890		miRNA	miRBase:MI0000433
ENSG00000252787	1.11152e-07	1.13583	0.183749	1.13583	up	SNORD19B		ENSG00000252787	snoRNA	RFAM:RF01183
ENSG00000238862	1.11022e-16	1.40555	0.49113	1.40555	up	SNORD19B		ENSG00000238862	snoRNA	RFAM:RF01183
ENSG00000222345	0.00078159	1.29546	0.373461	1.29546	up	SNORD19		ENSG00000222345	snoRNA	RFAM:RF00569
ENSG00000212452	0	1.18439	0.244142	1.18439	up	SNORD69	692109	ENSG00000212452	snoRNA	RFAM:RF00574
NEWGENE344	1.20248e-12	1.05647	0.0792584	1.05647	up				Unknown
NEWGENE345	0.0286201	-1.10706	-0.146728	1.10706	down				Unknown
NEWGENE348	0.000211998	1.37982	0.464484	1.37982	up				Unknown
NEWGENE350	0.000576797	-1.07664	-0.106537	1.07664	down				Unknown
NEWGENE3089	0.0042763	1.05636	0.0791016	1.05636	up				miRNA
NEWGENE353	0.00193433	1.09967	0.137073	1.09967	up				Unknown
NEWGENE357	3.11126e-10	-1.14857	-0.19984	1.14857	down				Unknown
NEWGENE3090	0.00084842	-1.20308	-0.266735	1.20308	down				miRNA
NEWGENE361	5.41244e-05	-1.17312	-0.230348	1.17312	down				Unknown
NEWGENE364	1.0334e-12	1.64871	0.721336	1.64871	up				Unknown
NEWGENE368	0.0182311	-1.16754	-0.223471	1.16754	down				Unknown
NEWGENE370	1.33227e-15	1.32796	0.409211	1.32796	up				Unknown
NEWGENE373	3.4145e-05	1.30455	0.383549	1.30455	up				Unknown
NEWGENE374	2.21878e-12	-1.12878	-0.174768	1.12878	down				Unknown
NEWGENE3092	0	-1.17811	-0.236479	1.17811	down				miRNA
NEWGENE381	0.0262756	1.19904	0.261877	1.19904	up				Unknown
NEWGENE388	0	1.18422	0.243933	1.18422	up				Unknown
NEWGENE3093	0.000493676	-1.19148	-0.252749	1.19148	down				miRNA
NEWGENE3094	0.0487206	-1.09658	-0.133016	1.09658	down				miRNA
NEWGENE393	0.00256219	-1.08559	-0.118473	1.08559	down				Unknown
NEWGENE398	7.98123e-05	1.25802	0.331151	1.25802	up				Unknown
ENSG00000238959	0.00113532	-1.12571	-0.170836	1.12571	down	RNU7-19P		ENSG00000238959	snRNA	RFAM:RF00066
ENSG00000223247	0	3.80684	1.9286	3.80684	up	RNU2-64P		ENSG00000223247	snRNA	RFAM:RF00004
NEWGENE400	5.76826e-06	1.3216	0.402284	1.3216	up				Unknown
NEWGENE404	1.48057e-08	1.16426	0.21941	1.16426	up				Unknown
NEWGENE406	0.0013342	1.08406	0.116446	1.08406	up				Unknown
NEWGENE407	0.00851885	1.16978	0.226239	1.16978	up				Unknown
NEWGENE408	0.00137404	1.36819	0.452272	1.36819	up				Unknown
NEWGENE410	5.64137e-05	1.14872	0.200027	1.14872	up				Unknown
NEWGENE416	0.00208617	1.1174	0.160149	1.1174	up				Unknown
NEWGENE3095	0.000231323	1.10935	0.149717	1.10935	up				miRNA
NEWGENE3096	5.97998e-05	1.34897	0.431862	1.34897	up				miRNA
NEWGENE3097	0.00544332	-1.11445	-0.156332	1.11445	down				miRNA
NEWGENE431	1.59618e-07	-1.02641	-0.0376133	1.02641	down				Unknown
NEWGENE434	0.0295584	-1.08843	-0.122252	1.08843	down				Unknown
NEWGENE437	6.89204e-07	1.32356	0.404422	1.32356	up				Unknown
NEWGENE3098	0.0162053	-1.13212	-0.179033	1.13212	down				miRNA
NEWGENE446	1.43517e-11	-1.03952	-0.0559136	1.03952	down				Unknown
NEWGENE3099	1.59745e-05	-1.15503	-0.207933	1.15503	down				tRNA
NEWGENE455	1.25233e-13	1.26563	0.339859	1.26563	up				Unknown
NEWGENE3102	0	1.22828	0.296643	1.22828	up				tRNA
NEWGENE459	0.00227845	1.08933	0.123441	1.08933	up				Unknown
NEWGENE3103	1.34515e-12	1.30355	0.382441	1.30355	up				miRNA
NEWGENE463	2.59792e-12	-1.23166	-0.300601	1.23166	down				Unknown
NEWGENE466	0.0210192	1.14249	0.192186	1.14249	up				Unknown
NEWGENE470	0.00302667	1.09226	0.127314	1.09226	up				Unknown
ENSG00000201121	0.0372959	1.10029	0.137883	1.10029	up	Y_RNA		ENSG00000201121	scRNA	RFAM:RF00019
ENSG00000201922	2.4777e-06	1.07743	0.107594	1.07743	up	RNU1-43P		ENSG00000201922	snRNA	RFAM:RF00003
NEWGENE481	1.38778e-13	1.215	0.280961	1.215	up				Unknown
NEWGENE3106	4.44089e-16	1.03451	0.0489406	1.03451	up				miRNA
NEWGENE491	0	1.05636	0.0791016	1.05636	up				Unknown
ENSG00000201426	0.000145558	1.11168	0.152744	1.11168	up	Y_RNA		ENSG00000201426	scRNA	RFAM:RF00019
NEWGENE505	0.00930099	1.03041	0.0432246	1.03041	up				Unknown
NEWGENE511	3.53692e-05	1.16195	0.21655	1.16195	up				Unknown
NEWGENE512	4.15223e-14	1.21689	0.283195	1.21689	up				Unknown
NEWGENE520	1.47951e-07	-1.10267	-0.140996	1.10267	down				Unknown
NEWGENE522	0	1.36799	0.452057	1.36799	up				Unknown
NEWGENE3108	4.25237e-10	1.08363	0.115866	1.08363	up				miRNA
NEWGENE525	1.17273e-05	1.31842	0.398809	1.31842	up				Unknown
NEWGENE3109	0	1.54094	0.62381	1.54094	up				miRNA
NEWGENE535	2.90253e-09	1.35308	0.43625	1.35308	up				Unknown
NEWGENE536	0	1.8663	0.900184	1.8663	up				Unknown
MI0014159	0.0315717	-1	0	1	down	hsa-mir-544b	100422864		miRNA	miRBase:MI0014159
ENSG00000201800	1.97636e-09	1.44592	0.531992	1.44592	up	Y_RNA		ENSG00000201800	scRNA	RFAM:RF00019
NEWGENE542	7.88395e-10	-1.18961	-0.25049	1.18961	down				Unknown
NEWGENE543	0	-1.14955	-0.201071	1.14955	down				Unknown
NEWGENE3110	1.53151e-06	1.07441	0.103549	1.07441	up				miRNA
ENSG00000222627	0.011597	1.45397	0.540002	1.45397	up	RNU2-37P		ENSG00000222627	snRNA	RFAM:RF00004
ENSG00000207088	0	1.57625	0.656501	1.57625	up	SNORA7B	677797	ENSG00000207088	snoRNA	RFAM:RF00409
NEWGENE556	0	1.17601	0.2339	1.17601	up				Unknown
ENSG00000249020	0.00175594	1.22629	0.294298	1.22629	up	SNORA58	677836	ENSG00000249020	snoRNA	RFAM:RF00418
NEWGENE560	0	1.07825	0.108686	1.07825	up				Unknown
NEWGENE561	0.0172115	1.12159	0.165539	1.12159	up				Unknown
chr3.trna7	0	1.08635	0.119487	1.08635	up	trna7			tRNA
NEWGENE3111	4.13686e-09	1.36367	0.447493	1.36367	up				tRNA
NEWGENE567	0	1.16997	0.226467	1.16997	up				Unknown
NEWGENE570	0.0103868	-1.10465	-0.143593	1.10465	down				Unknown
NEWGENE3114	2.17868e-08	-1.10993	-0.150469	1.10993	down				miRNA
NEWGENE572	1.66533e-13	1.32316	0.403987	1.32316	up				Unknown
NEWGENE573	0	-1.12868	-0.174643	1.12868	down				Unknown
ENSG00000202125	0.00236371	1.00893	0.0128205	1.00893	up	RNU1-100P		ENSG00000202125	snRNA	RFAM:RF00003
NEWGENE575	0.00614644	-1.08467	-0.11725	1.08467	down				Unknown
NEWGENE576	1.97842e-13	1.4177	0.503548	1.4177	up				Unknown
NEWGENE3115	0.0357716	1.21522	0.281221	1.21522	up				miRNA
NEWGENE577	0	-1.26917	-0.343881	1.26917	down				Unknown
NEWGENE3116	9.26786e-05	-1.29967	-0.378142	1.29967	down				miRNA
ENSG00000201031	4.66623e-10	1.21535	0.281377	1.21535	up	Y_RNA		ENSG00000201031	scRNA	RFAM:RF00019
NEWGENE583	7.28129e-08	-1.39585	-0.481141	1.39585	down				Unknown
NEWGENE595	3.87697e-07	1.27218	0.3473	1.27218	up				Unknown
NEWGENE596	0	1.11704	0.159684	1.11704	up				Unknown
NEWGENE3119	0	1.87796	0.909166	1.87796	up				miRNA
NEWGENE603	6.29755e-05	1.20474	0.268725	1.20474	up				Unknown
NEWGENE821	0.0067474	-1.05111	-0.0719143	1.05111	down				Unknown
ENSG00000201778	0	-1.42363	-0.509574	1.42363	down	Y_RNA		ENSG00000201778	scRNA	RFAM:RF00019
NEWGENE823	0	1.50016	0.585118	1.50016	up				Unknown
NEWGENE824	0.0351766	-1.08072	-0.111992	1.08072	down				Unknown
NEWGENE825	0.000157795	-1.0886	-0.122476	1.0886	down				Unknown
NEWGENE826	1.90463e-05	1.26059	0.334104	1.26059	up				Unknown
NEWGENE852	0.00114272	-1.10425	-0.143062	1.10425	down				Unknown
NEWGENE3120	0.000906855	1.18585	0.245917	1.18585	up				miRNA
MI0000438	0	-1.50139	-0.586296	1.50139	down	hsa-mir-15b	406949		miRNA	miRBase:MI0000438
MI0000115	0	-1.18344	-0.242985	1.18344	down	hsa-mir-16-2	406951		miRNA	miRBase:MI0000115
ENSG00000238741	0.000742982	1.38085	0.465554	1.38085	up	SCARNA7	677767	ENSG00000238741	snoRNA	RFAM:RF01295
NEWGENE3121	6.86552e-05	-1.10338	-0.141936	1.10338	down				miRNA
NEWGENE876	0	1.94919	0.962875	1.94919	up				Unknown
NEWGENE877	0.0265121	-1.14715	-0.198052	1.14715	down				Unknown
NEWGENE878	0.00736559	1.32865	0.40996	1.32865	up				Unknown
NEWGENE879	0	2.68534	1.42511	2.68534	up				Unknown
ENSG00000200052	0.0039235	1.01793	0.025641	1.01793	up	Y_RNA		ENSG00000200052	scRNA	RFAM:RF00019
NEWGENE881	0	1.50291	0.587761	1.50291	up				Unknown
chr3.trna2	0	1.04112	0.0581421	1.04112	up	trna2			tRNA
NEWGENE883	5.44009e-15	-1.12505	-0.169995	1.12505	down				Unknown
NEWGENE884	0.00883138	1.07051	0.0982935	1.07051	up				Unknown
ENSG00000201458	0.00323631	1.08823	0.121986	1.08823	up	RNU4-4P		ENSG00000201458	snRNA	RFAM:RF00015
NEWGENE886	5.88412e-08	1.13126	0.177936	1.13126	up				Unknown
NEWGENE887	0	-1.24101	-0.311516	1.24101	down				Unknown
NEWGENE888	0.00188626	-1.03973	-0.0562109	1.03973	down				Unknown
ENSG00000201343	0.0332489	-1.1175	-0.160277	1.1175	down	Y_RNA		ENSG00000201343	scRNA	RFAM:RF00019
ENSG00000200616	0.0109696	-1	0	1	down	Y_RNA		ENSG00000200616	scRNA	RFAM:RF00019
NEWGENE3124	2.75715e-10	1.57833	0.658396	1.57833	up				miRNA
NEWGENE3125	2.20389e-05	-1.09795	-0.134818	1.09795	down				tRNA
ENSG00000206932	1.60205e-13	-1.22057	-0.287551	1.22057	down	RNU6-4P	101954271|26826|26827	ENSG00000206932	snRNA	RFAM:RF00026
NEWGENE889	0	-1.28213	-0.358547	1.28213	down				Unknown
NEWGENE890	0	1.18029	0.239138	1.18029	up				Unknown
NEWGENE3126	4.41102e-07	-1.09779	-0.134596	1.09779	down				snoRNA
NEWGENE891	0.000639557	-1.17956	-0.238247	1.17956	down				Unknown
NEWGENE892	2.23267e-05	1.29421	0.372069	1.29421	up				Unknown
ENSG00000199363	0.000262639	1.16484	0.220136	1.16484	up	SNORA63		ENSG00000199363	snoRNA	RFAM:RF00092
ENSG00000212158	0	1.45956	0.545537	1.45956	up	SNORD66	692107	ENSG00000212158	snoRNA	RFAM:RF00572
NEWGENE894	0.00908774	1.22426	0.291908	1.22426	up				Unknown
NEWGENE908	0.00575942	1.28122	0.357518	1.28122	up				Unknown
ENSG00000238942	0	1.4784	0.56404	1.4784	up	SNORD2		ENSG00000238942	snoRNA	RFAM:RF01299
MI0006383	0	1.92367	0.943865	1.92367	up	hsa-mir-1248	100302143		miRNA	miRBase:MI0006383
ENSG00000221420	0	1.58752	0.666775	1.58752	up	SNORA81	677847	ENSG00000221420	snoRNA	RFAM:RF01241
ENSG00000200320	0	1.33921	0.421377	1.33921	up	SNORA63		ENSG00000200320	snoRNA	RFAM:RF00092
ENSG00000263776	0	1.66097	0.732024	1.66097	up	SNORA4	619568	ENSG00000263776	snoRNA	RFAM:RF00394
NEWGENE3127	0.00642544	1.16423	0.219378	1.16423	up				miRNA
NEWGENE910	0.00785257	-1.14351	-0.193475	1.14351	down				Unknown
MI0000086	0.046599	-1.1825	-0.241836	1.1825	down	hsa-mir-28	407020		miRNA	miRBase:MI0000086
MI0005769	0.0185238	1.00893	0.0128205	1.00893	up	hsa-mir-944	100126340		miRNA	miRBase:MI0005769
NEWGENE911	0.000108379	1.29958	0.378045	1.29958	up				Unknown
NEWGENE913	0.0194829	1.1936	0.25532	1.1936	up				Unknown
ENSG00000238902	0.0131311	-1.02811	-0.04	1.02811	down	snoU13		ENSG00000238902	snoRNA	RFAM:RF01210
ENSG00000200184	0.0185238	-1	0	1	down	RNU1-20P		ENSG00000200184	snRNA	RFAM:RF00003
NEWGENE914	8.23712e-11	1.45344	0.539468	1.45344	up				Unknown
NEWGENE915	0.00366203	1.25244	0.324747	1.25244	up				Unknown
ENSG00000239122	0.0315717	1.00893	0.0128205	1.00893	up	RNU2-11P		ENSG00000239122	snRNA	RFAM:RF00004
NEWGENE916	0.00291768	1.18301	0.242462	1.18301	up				Unknown
NEWGENE917	0.000440154	1.17995	0.23873	1.17995	up				Unknown
NEWGENE302	1.74205e-07	-1.33641	-0.418359	1.33641	down				Unknown
NEWGENE303	0.0244669	-1.12396	-0.168589	1.12396	down				Unknown
NEWGENE3129	0	1.1917	0.253016	1.1917	up				miRNA
NEWGENE306	2.33932e-06	-1.11633	-0.158769	1.11633	down				Unknown
ENSG00000249784	0.000862021	1.15003	0.201666	1.15003	up	SCARNA22	677770	ENSG00000249784	snoRNA	RFAM:RF00427
NEWGENE308	2.57065e-05	1.182	0.241231	1.182	up				Unknown
NEWGENE310	1.10726e-06	1.20019	0.263258	1.20019	up				Unknown
NEWGENE311	1.38659e-09	-1.19464	-0.256582	1.19464	down				Unknown
NEWGENE313	0.00410441	-1.0041	-0.00589633	1.0041	down				Unknown
NEWGENE315	0	1.15746	0.210966	1.15746	up				Unknown
NEWGENE3130	0.0364473	1.04543	0.0641026	1.04543	up				snoRNA
NEWGENE3131	0	-1.24419	-0.315205	1.24419	down				tRNA
NEWGENE325	6.16734e-07	1.4006	0.486044	1.4006	up				Unknown
MI0000097	0.000196443	1.03237	0.0459611	1.03237	up	hsa-mir-95	407052		miRNA	miRBase:MI0000097
NEWGENE332	0	1.16611	0.221699	1.16611	up				Unknown
NEWGENE337	7.51612e-06	1.19013	0.251123	1.19013	up				Unknown
NEWGENE341	8.03951e-10	1.18246	0.241795	1.18246	up				Unknown
NEWGENE347	0	1.52025	0.60431	1.52025	up				Unknown
NEWGENE351	3.68111e-08	1.45534	0.541359	1.45534	up				Unknown
NEWGENE3132	0.000763445	1.11579	0.158062	1.11579	up				miRNA
NEWGENE354	3.57492e-14	1.5607	0.64219	1.5607	up				Unknown
NEWGENE356	9.54792e-15	1.17017	0.226716	1.17017	up				Unknown
NEWGENE359	1.98121e-07	-1.10101	-0.138834	1.10101	down				Unknown
NEWGENE363	4.00182e-06	-1.06962	-0.0970942	1.06962	down				Unknown
NEWGENE366	3.13879e-09	1.12158	0.16553	1.12158	up				Unknown
NEWGENE367	0	1.54078	0.623657	1.54078	up				Unknown
NEWGENE372	2.62649e-07	1.13358	0.180882	1.13358	up				Unknown
NEWGENE375	0.000414606	1.01637	0.0234255	1.01637	up				Unknown
NEWGENE379	1.09565e-05	1.39922	0.484626	1.39922	up				Unknown
NEWGENE383	0.000999336	1.07807	0.108453	1.07807	up				Unknown
NEWGENE385	1.63655e-05	1.20105	0.264298	1.20105	up				Unknown
NEWGENE391	0.000219908	-1.21259	-0.278089	1.21259	down				Unknown
NEWGENE392	0	1.12098	0.164755	1.12098	up				Unknown
NEWGENE395	3.91653e-10	1.03663	0.0519075	1.03663	up				Unknown
NEWGENE396	0.000137627	-1.37509	-0.459529	1.37509	down				Unknown
NEWGENE397	2.76407e-08	1.33306	0.414741	1.33306	up				Unknown
NEWGENE3133	0	1.2581	0.331251	1.2581	up				tRNA
NEWGENE403	7.76046e-14	-1.12868	-0.174642	1.12868	down				Unknown
ENSG00000201863	0.0109696	1.01418	0.02032	1.01418	up	SNORA51		ENSG00000201863	snoRNA	RFAM:RF00432
NEWGENE415	0.0161846	1.11528	0.157402	1.11528	up				Unknown
NEWGENE3135	6.06128e-07	1.18139	0.240483	1.18139	up				miRNA
NEWGENE426	0.0141339	1.18508	0.244989	1.18508	up				Unknown
NEWGENE428	0	2.14237	1.09921	2.14237	up				Unknown
NEWGENE443	9.10055e-08	1.2847	0.361431	1.2847	up				Unknown
NEWGENE445	0.0444094	-1.35429	-0.437537	1.35429	down				Unknown
NEWGENE457	0.0148656	1.0895	0.123669	1.0895	up				Unknown
ENSG00000240177	1.46561e-08	1.26679	0.341176	1.26679	up	AC111194.1		ENSG00000240177	snRNA_pseudogene
NEWGENE3136	3.28343e-06	-1.07501	-0.104351	1.07501	down				miRNA
NEWGENE473	0	2.29154	1.19632	2.29154	up				Unknown
ENSG00000201676	0.0109696	1.00893	0.0128205	1.00893	up	Y_RNA		ENSG00000201676	scRNA	RFAM:RF00019
NEWGENE474	0.0252804	-1.11652	-0.159003	1.11652	down				Unknown
NEWGENE477	0.0432277	-1.03173	-0.0450695	1.03173	down				Unknown
NEWGENE482	0.000235715	1.14359	0.193571	1.14359	up				Unknown
NEWGENE486	0.000365095	1.13822	0.186779	1.13822	up				Unknown
NEWGENE490	0.00382455	1.18537	0.245334	1.18537	up				Unknown
NEWGENE492	0	-1.27449	-0.349916	1.27449	down				Unknown
NEWGENE3138	0	-1.25878	-0.332024	1.25878	down				snoRNA
NEWGENE519	0.000515015	1.25689	0.329854	1.25689	up				Unknown
NEWGENE521	0.000362208	-1.04652	-0.0656002	1.04652	down				Unknown
ENSG00000252955	2.51614e-06	1.08939	0.123524	1.08939	up	RNU4ATAC9P		ENSG00000252955	snRNA	RFAM:RF00618
ENSG00000221639	0.0185238	-1	0	1	down	SNORA3		ENSG00000221639	snoRNA	RFAM:RF00334
NEWGENE529	0.025856	1.22275	0.290125	1.22275	up				Unknown
ENSG00000201644	0.0163131	1.10605	0.14542	1.10605	up	Y_RNA		ENSG00000201644	scRNA	RFAM:RF00019
NEWGENE3146	0	1.65606	0.727752	1.65606	up				miRNA
ENSG00000241914	1.63781e-05	-1.01761	-0.0251911	1.01761	down	AC096743.1		ENSG00000241914	scRNA_pseudogene
NEWGENE547	0.00447974	-1.21154	-0.276841	1.21154	down				Unknown
NEWGENE549	1.31032e-08	-1.12241	-0.166601	1.12241	down				Unknown
ENSG00000200998	0.00534126	1.06579	0.0919221	1.06579	up	Y_RNA		ENSG00000200998	scRNA	RFAM:RF00019
NEWGENE552	0.00315235	-1.03388	-0.0480702	1.03388	down				Unknown
NEWGENE554	7.6125e-05	1.16822	0.224308	1.16822	up				Unknown
NEWGENE3147	0.00586409	1.41307	0.498834	1.41307	up				tRNA
NEWGENE587	1.14848e-08	1.06635	0.0926841	1.06635	up				Unknown
NEWGENE589	9.94358e-09	-1.32414	-0.405053	1.32414	down				Unknown
ENSG00000207524	9.04943e-13	-1.22881	-0.297257	1.22881	down	RNU6-33P	100873748	ENSG00000207524	snRNA	RFAM:RF00026
NEWGENE597	0	1.10134	0.139265	1.10134	up				Unknown
NEWGENE599	1.14066e-10	1.26297	0.336816	1.26297	up				Unknown
NEWGENE600	7.74493e-09	1.30244	0.381213	1.30244	up				Unknown
NEWGENE601	0.0220346	-1.04546	-0.0641392	1.04546	down				Unknown
NEWGENE3152	0.00585705	1.07906	0.109772	1.07906	up				miRNA
NEWGENE604	0.000223852	1.26482	0.338929	1.26482	up				Unknown
ENSG00000201744	0.00236371	1.02702	0.0384615	1.02702	up	RNU6-34P	100873749	ENSG00000201744	snRNA	RFAM:RF00026
NEWGENE605	0.00358386	-1.02186	-0.031199	1.02186	down				Unknown
NEWGENE608	0.00934652	1.13709	0.185349	1.13709	up				Unknown
NEWGENE609	0	-1.33506	-0.416909	1.33506	down				Unknown
NEWGENE616	0.00801807	1.18189	0.241098	1.18189	up				Unknown
NEWGENE3154	0.00137083	1.2742	0.349592	1.2742	up				tRNA
NEWGENE618	0	1.05195	0.0730671	1.05195	up				Unknown
NEWGENE619	1.05436e-09	-1.17578	-0.23362	1.17578	down				Unknown
ENSG00000207260	0.0378765	-1	0	1	down	RNU6-35P	100873750	ENSG00000207260	snRNA	RFAM:RF00026
NEWGENE626	0.00315235	-1.04159	-0.0587808	1.04159	down				Unknown
NEWGENE627	1.02927e-05	1.31841	0.398801	1.31841	up				Unknown
NEWGENE629	0	1.03462	0.0491068	1.03462	up				Unknown
NEWGENE630	0	1.09414	0.129791	1.09414	up				Unknown
ENSG00000206820	0.0200623	1.03237	0.0459611	1.03237	up	RNU1-138P		ENSG00000206820	snRNA	RFAM:RF00003
NEWGENE631	0	-1.07263	-0.101155	1.07263	down				Unknown
NEWGENE632	0	1.17938	0.238023	1.17938	up				Unknown
MI0009983	0.0315717	1.01418	0.02032	1.01418	up	hsa-mir-1973	100302290		miRNA	miRBase:MI0009983
NEWGENE633	0.000259923	1.35408	0.437313	1.35408	up				Unknown
NEWGENE3156	1.51503e-05	1.34522	0.427841	1.34522	up				miRNA
NEWGENE3158	0.000133617	1.4409	0.526966	1.4409	up				snoRNA
NEWGENE3160	8.64331e-12	1.4097	0.495393	1.4097	up				tRNA
NEWGENE635	5.38636e-12	1.05172	0.0727497	1.05172	up				Unknown
NEWGENE3161	0.00267272	1.13083	0.177386	1.13083	up				miRNA
chr4.trna3	0.000138995	-1.05158	-0.072554	1.05158	down	trna3			tRNA
NEWGENE638	0	1.49576	0.580882	1.49576	up				Unknown
NEWGENE641	0	-1.15115	-0.203077	1.15115	down				Unknown
NEWGENE644	0.00529351	1.21821	0.284763	1.21821	up				Unknown
NEWGENE645	4.64661e-05	-1.16503	-0.220372	1.16503	down				Unknown
NEWGENE3162	0.00109372	1.28137	0.357684	1.28137	up				tRNA
NEWGENE3163	5.25028e-06	1.13475	0.182381	1.13475	up				miRNA
ENSG00000239286	4.19752e-10	-1.03078	-0.0437388	1.03078	down	AC109927.1		ENSG00000239286	scRNA_pseudogene
ENSG00000241637	4.08662e-06	1.29053	0.367965	1.29053	up	AC024032.2		ENSG00000241637	tRNA_pseudogene
NEWGENE655	0	-1.52483	-0.608644	1.52483	down				Unknown
NEWGENE656	3.94049e-05	1.16387	0.218934	1.16387	up				Unknown
NEWGENE3166	0.000963962	1.13714	0.185413	1.13714	up				miRNA
NEWGENE659	3.38896e-11	-1.13883	-0.187555	1.13883	down				Unknown
NEWGENE660	4.30409e-08	1.3207	0.4013	1.3207	up				Unknown
NEWGENE662	0.041631	1.17773	0.236015	1.17773	up				Unknown
NEWGENE663	0.00330873	-1.0948	-0.130667	1.0948	down				Unknown
NEWGENE664	0.0209427	-1.03739	-0.052955	1.03739	down				Unknown
NEWGENE692	0.000163354	-1.26083	-0.334374	1.26083	down				Unknown
ENSG00000208797	0	-1.08631	-0.119434	1.08631	down	SNORD73A	8944	ENSG00000208797	snoRNA	RFAM:RF00071
NEWGENE693	0	-1.24057	-0.311005	1.24057	down				Unknown
NEWGENE694	0	1.18393	0.243585	1.18393	up				Unknown
NEWGENE696	0.00327385	-1.1367	-0.184847	1.1367	down				Unknown
ENSG00000201786	0.000773623	1.22774	0.296007	1.22774	up	Y_RNA		ENSG00000201786	scRNA	RFAM:RF00019
NEWGENE697	1.0084e-06	1.25182	0.324022	1.25182	up				Unknown
NEWGENE700	0.00203539	1.09516	0.131145	1.09516	up				Unknown
NEWGENE3168	1.32339e-13	1.1915	0.252773	1.1915	up				miRNA
NEWGENE3169	8.03559e-06	-1.13686	-0.185051	1.13686	down				miRNA
NEWGENE704	4.12381e-12	1.11475	0.156718	1.11475	up				Unknown
NEWGENE706	0.00150313	-1.2164	-0.282614	1.2164	down				Unknown
NEWGENE707	3.17424e-10	1.24957	0.321436	1.24957	up				Unknown
NEWGENE3171	0.000612638	-1.13032	-0.176733	1.13032	down				snoRNA
NEWGENE710	0.0355618	1.16854	0.22471	1.16854	up				Unknown
NEWGENE3172	1.03192e-10	1.19394	0.255736	1.19394	up				miRNA
NEWGENE3173	0.000411548	1.19166	0.252971	1.19166	up				miRNA
NEWGENE718	0.0483445	1.00257	0.00370538	1.00257	up				Unknown
NEWGENE719	1.4877e-14	-1.01071	-0.015375	1.01071	down				Unknown
NEWGENE3175	0	-1.00675	-0.00971186	1.00675	down				miRNA
NEWGENE720	0	1.1038	0.142477	1.1038	up				Unknown
NEWGENE721	1.39333e-13	-1.12484	-0.169718	1.12484	down				Unknown
NEWGENE722	0	1.56345	0.644729	1.56345	up				Unknown
NEWGENE726	4.23031e-05	1.13245	0.17945	1.13245	up				Unknown
NEWGENE727	6.06483e-05	1.16703	0.222838	1.16703	up				Unknown
NEWGENE728	0.0392608	1.17113	0.227903	1.17113	up				Unknown
NEWGENE732	3.33067e-16	-1.12665	-0.172037	1.12665	down				Unknown
NEWGENE734	1.67538e-08	1.23834	0.308402	1.23834	up				Unknown
NEWGENE735	5.65346e-05	-1.19836	-0.261058	1.19836	down				Unknown
NEWGENE739	0.00118357	1.18059	0.239512	1.18059	up				Unknown
NEWGENE742	0	1.40338	0.488901	1.40338	up				Unknown
MI0020352	0.0131311	-1.02811	-0.04	1.02811	down	hsa-mir-6075			miRNA	miRBase:MI0020352
ENSG00000201026	0.0185238	-1	0	1	down	Y_RNA		ENSG00000201026	scRNA	RFAM:RF00019
NEWGENE793	0	1.44859	0.534647	1.44859	up				Unknown
NEWGENE794	1.4381e-06	-1.10312	-0.14159	1.10312	down				Unknown
NEWGENE795	6.88191e-08	1.03946	0.0558397	1.03946	up				Unknown
NEWGENE3182	9.6173e-06	1.25471	0.327351	1.25471	up				miRNA
NEWGENE3183	0	-1.17094	-0.227663	1.17094	down				miRNA
NEWGENE797	0.000982417	1.15092	0.202785	1.15092	up				Unknown
NEWGENE798	9.80043e-08	1.10814	0.148136	1.10814	up				Unknown
NEWGENE799	5.14376e-05	1.23764	0.30759	1.23764	up				Unknown
NEWGENE800	0	1.33916	0.421333	1.33916	up				Unknown
NEWGENE803	1.65068e-12	1.12054	0.1642	1.12054	up				Unknown
NEWGENE3185	0.000384028	1.01411	0.0202123	1.01411	up				miRNA
ENSG00000207312	0.0185238	1.01793	0.025641	1.01793	up	RNU6-429P		ENSG00000207312	snRNA	RFAM:RF00026
ENSG00000202269	2.56514e-05	1.46112	0.547074	1.46112	up	U8		ENSG00000202269	snoRNA	RFAM:RF00096
NEWGENE805	0.000235076	1.07449	0.10365	1.07449	up				Unknown
NEWGENE3186	3.00874e-05	1.11642	0.158876	1.11642	up				miRNA
NEWGENE807	6.01161e-09	1.1496	0.201131	1.1496	up				Unknown
NEWGENE808	0.000627314	1.20196	0.26539	1.20196	up				Unknown
NEWGENE809	0.00401849	1.12253	0.166753	1.12253	up				Unknown
NEWGENE812	4.88971e-06	1.06651	0.0929016	1.06651	up				Unknown
NEWGENE3187	1.34593e-05	1.02594	0.0369442	1.02594	up				miRNA
ENSG00000206912	0.0315717	1.00893	0.0128205	1.00893	up	Y_RNA		ENSG00000206912	scRNA	RFAM:RF00019
NEWGENE816	0.00632377	-1.25006	-0.321993	1.25006	down				Unknown
ENSG00000207261	0.00226326	1.06068	0.0849917	1.06068	up	RNU6-738P		ENSG00000207261	snRNA	RFAM:RF00026
NEWGENE822	0.000664639	1.10749	0.147296	1.10749	up				Unknown
NEWGENE827	2.25585e-09	-1.0025	-0.00360338	1.0025	down				Unknown
NEWGENE828	0.000578304	1.2469	0.318351	1.2469	up				Unknown
MI0003586	0.0078233	1.17585	0.23371	1.17585	up	hsa-mir-579	693164		miRNA	miRBase:MI0003586
NEWGENE830	3.25995e-06	1.13252	0.17954	1.13252	up				Unknown
NEWGENE831	0.0273063	1.13721	0.185499	1.13721	up				Unknown
NEWGENE832	1.22678e-06	1.30544	0.384538	1.30544	up				Unknown
NEWGENE3188	9.72068e-07	-1.15971	-0.213768	1.15971	down				miRNA
NEWGENE834	0.0260232	1.00105	0.00150708	1.00105	up				Unknown
NEWGENE3189	5.9513e-05	1.10019	0.137754	1.10019	up				miRNA
NEWGENE835	3.83361e-09	1.11431	0.156156	1.11431	up				Unknown
NEWGENE837	0.0235312	1.06553	0.0915775	1.06553	up				Unknown
NEWGENE839	2.07632e-11	-1.28508	-0.361861	1.28508	down				Unknown
NEWGENE840	0.000977998	-1.00985	-0.0141366	1.00985	down				Unknown
NEWGENE844	0.00283572	1.0567	0.0795666	1.0567	up				Unknown
NEWGENE845	0.00193433	1.19583	0.258011	1.19583	up				Unknown
NEWGENE846	0.0166432	-1.13248	-0.179485	1.13248	down				Unknown
NEWGENE848	0.00797701	-1.18625	-0.246407	1.18625	down				Unknown
NEWGENE850	0.00836312	1.10585	0.145157	1.10585	up				Unknown
ENSG00000210678	0.0131796	1.19317	0.254794	1.19317	up	RNU6ATAC2P		ENSG00000210678	snRNA	RFAM:RF00619
NEWGENE851	0	1.77332	0.826455	1.77332	up				Unknown
NEWGENE3191	0.0067145	-1.14955	-0.201068	1.14955	down				miRNA
NEWGENE854	0.0346206	-1.07158	-0.0997379	1.07158	down				Unknown
NEWGENE3193	0	1.79885	0.847074	1.79885	up				miRNA
NEWGENE857	0.0386198	-1.08829	-0.122062	1.08829	down				Unknown
MI0003589	6.82767e-09	1.22999	0.298642	1.22999	up	hsa-mir-582	693167		miRNA	miRBase:MI0003589
NEWGENE3194	0.0066183	-1.10401	-0.142758	1.10401	down				miRNA
NEWGENE3195	0	-1.15494	-0.207812	1.15494	down				miRNA
NEWGENE859	0	1.37956	0.464208	1.37956	up				Unknown
NEWGENE862	0	1.05865	0.0822266	1.05865	up				Unknown
NEWGENE864	5.81769e-05	1.30951	0.389031	1.30951	up				Unknown
ENSG00000212249	0.00460916	-1.15602	-0.209163	1.15602	down	U8		ENSG00000212249	snoRNA	RFAM:RF00096
NEWGENE866	6.29943e-05	1.14393	0.193997	1.14393	up				Unknown
NEWGENE868	0.0461288	1.04155	0.0587291	1.04155	up				Unknown
NEWGENE3196	6.1102e-06	1.05665	0.0794941	1.05665	up				snoRNA
MI0017452	0.0185238	1.00893	0.0128205	1.00893	up	hsa-mir-4804	100616152		miRNA	miRBase:MI0017452
NEWGENE869	0.0432935	1.10209	0.140246	1.10209	up				Unknown
NEWGENE870	0.0111879	1.27647	0.352155	1.27647	up				Unknown
NEWGENE871	0	1.46737	0.553235	1.46737	up				Unknown
NEWGENE873	7.72465e-06	1.13571	0.183598	1.13571	up				Unknown
NEWGENE3197	0	1.90129	0.926981	1.90129	up				miRNA
NEWGENE897	1.66459e-05	1.25881	0.332056	1.25881	up				Unknown
NEWGENE898	8.3024e-07	-1.12261	-0.166852	1.12261	down				Unknown
NEWGENE900	3.18562e-07	1.10355	0.142147	1.10355	up				Unknown
NEWGENE3198	2.3143e-08	1.22976	0.298379	1.22976	up				tRNA
NEWGENE3199	0.0039034	1.19575	0.257918	1.19575	up				miRNA
NEWGENE3201	0.00427941	1.18192	0.241133	1.18192	up				tRNA
NEWGENE906	0.0171838	1.02006	0.028659	1.02006	up				Unknown
NEWGENE3203	6.87515e-11	1.47865	0.564283	1.47865	up				miRNA
NEWGENE909	0.00968211	1.13474	0.182358	1.13474	up				Unknown
MI0015997	0	1.151	0.202886	1.151	up	hsa-mir-3607	100500805		miRNA	miRBase:MI0015997
ENSG00000199262	0	1.15104	0.202936	1.15104	up	MIR3607	100500805	ENSG00000199262	snoRNA	RFAM:RF00341
MI0000467	3.46405e-06	1.05566	0.0781393	1.05566	up	hsa-mir-9-2	407047	ENSG00000245526	miRNA	miRBase:MI0000467
NEWGENE920	7.97841e-08	-1.40359	-0.489119	1.40359	down				Unknown
NEWGENE921	2.22045e-15	1.33671	0.418682	1.33671	up				Unknown
NEWGENE922	0.0432935	1.10287	0.14126	1.10287	up				Unknown
NEWGENE923	0.00170802	1.11318	0.154692	1.11318	up				Unknown
NEWGENE924	6.52995e-06	1.03851	0.054508	1.03851	up				Unknown
NEWGENE3205	0.0372959	1.0431	0.060877	1.0431	up				miRNA
uc021ybm.1	0	-1.0326	-0.0462763	1.0326	down	piR-57125			piRNA	DQ590013
NEWGENE3206	0.0027925	1.40282	0.488334	1.40282	up				miRNA
NEWGENE955	0.00531523	-1.04369	-0.0616922	1.04369	down				Unknown
NEWGENE956	2.35655e-07	1.29484	0.372775	1.29484	up				Unknown
NEWGENE958	0	-1.17533	-0.233071	1.17533	down				Unknown
NEWGENE3209	1.64359e-05	1.27458	0.350022	1.27458	up				snoRNA
NEWGENE3210	1.12799e-13	1.15192	0.204039	1.15192	up				miRNA
NEWGENE3213	0.0363844	1.29576	0.373796	1.29576	up				miRNA
ENSG00000201910	0.0039235	1.01793	0.025641	1.01793	up	RNU1-140P		ENSG00000201910	snRNA	RFAM:RF00003
NEWGENE964	0.000128324	1.06198	0.0867515	1.06198	up				Unknown
NEWGENE965	4.53132e-07	1.29898	0.377381	1.29898	up				Unknown
NEWGENE966	0.0397422	1.06255	0.0875256	1.06255	up				Unknown
ENSG00000252337	0.0093466	1.14563	0.196144	1.14563	up	SNORA31		ENSG00000252337	snoRNA	RFAM:RF00322
NEWGENE3216	0	1.15775	0.211323	1.15775	up				tRNA
NEWGENE968	1.64313e-14	1.25282	0.325183	1.25282	up				Unknown
ENSG00000206593	0.00654213	1.00893	0.0128205	1.00893	up	RNU6-47P		ENSG00000206593	snRNA	RFAM:RF00026
NEWGENE3217	4.17666e-13	1.16179	0.216349	1.16179	up				miRNA
NEWGENE971	0.00405023	-1.18567	-0.245698	1.18567	down				Unknown
NEWGENE973	0	-1.61815	-0.694344	1.61815	down				Unknown
ENSG00000251741	0.000617927	1.07906	0.109772	1.07906	up	RNU4ATAC13P		ENSG00000251741	snRNA	RFAM:RF00618
NEWGENE975	0	1.3133	0.393195	1.3133	up				Unknown
NEWGENE976	0	1.45564	0.541652	1.45564	up				Unknown
NEWGENE977	5.04321e-07	1.50113	0.586051	1.50113	up				Unknown
NEWGENE978	0.00153875	1.31957	0.400068	1.31957	up				Unknown
NEWGENE979	1.08922e-07	1.05143	0.0723571	1.05143	up				Unknown
NEWGENE980	0.00166995	1.18217	0.241432	1.18217	up				Unknown
NEWGENE981	0.00240839	-1.12294	-0.167279	1.12294	down				Unknown
NEWGENE982	0.000374527	1.13854	0.187188	1.13854	up				Unknown
NEWGENE3218	3.53336e-06	1.24856	0.320268	1.24856	up				miRNA
NEWGENE983	9.03258e-08	-1.08007	-0.111126	1.08007	down				Unknown
ENSG00000202105	2.09846e-10	1.35222	0.43533	1.35222	up	Y_RNA		ENSG00000202105	scRNA	RFAM:RF00019
NEWGENE3219	0.000179943	-1.01373	-0.0196694	1.01373	down				tRNA
NEWGENE3220	0.00296756	1.2919	0.369499	1.2919	up				miRNA
NEWGENE984	8.19983e-06	1.1527	0.205021	1.1527	up				Unknown
NEWGENE986	0	1.02909	0.0413642	1.02909	up				Unknown
NEWGENE987	2.34794e-09	-1.31478	-0.394823	1.31478	down				Unknown
NEWGENE988	1.91638e-07	1.13874	0.187434	1.13874	up				Unknown
NEWGENE3222	0.032425	1.1614	0.215861	1.1614	up				miRNA
NEWGENE989	4.23803e-07	-1.1201	-0.163622	1.1201	down				Unknown
NEWGENE990	2.22045e-16	-1.2392	-0.309412	1.2392	down				Unknown
NEWGENE991	8.49467e-08	1.15149	0.2035	1.15149	up				Unknown
ENSG00000202533	0	1.18353	0.243098	1.18353	up	Y_RNA		ENSG00000202533	scRNA	RFAM:RF00019
ENSG00000199677	0	1.63355	0.708009	1.63355	up	Y_RNA		ENSG00000199677	scRNA	RFAM:RF00019
NEWGENE3224	0	1.24892	0.320681	1.24892	up				tRNA
NEWGENE993	3.12412e-11	1.23978	0.31008	1.23978	up				Unknown
NEWGENE994	0	-1.13354	-0.180831	1.13354	down				Unknown
NEWGENE3225	0.0424332	1.03237	0.0459611	1.03237	up				miRNA
NEWGENE3231	0	-1.03253	-0.046188	1.03253	down				miRNA
NEWGENE3233	0.0426069	1.19371	0.255452	1.19371	up				miRNA
NEWGENE3238	0.00685301	1.13558	0.183434	1.13558	up				miRNA
NEWGENE995	8.43128e-07	-1.10117	-0.13904	1.10117	down				Unknown
NEWGENE3240	0.0183509	1.12033	0.163929	1.12033	up				miRNA
NEWGENE996	0.00136662	-1.02723	-0.0387577	1.02723	down				Unknown
ENSG00000206989	0.0177441	1.3166	0.396816	1.3166	up	SNORD63	26785	ENSG00000206989	snoRNA	RFAM:RF00154
NEWGENE998	0.0146776	1.10732	0.147073	1.10732	up				Unknown
ENSG00000252213	0.010782	1.52996	0.613495	1.52996	up	SNORA74		ENSG00000252213	snoRNA	RFAM:RF00090
ENSG00000200959	0	1.79547	0.844363	1.79547	up	SNORA74A	26821	ENSG00000200959	snoRNA	RFAM:RF00090
NEWGENE1000	1.50374e-07	1.05145	0.0723774	1.05145	up				Unknown
NEWGENE1001	8.98562e-05	-1.09534	-0.13138	1.09534	down				Unknown
ENSG00000200235	0.00161402	1.16484	0.220127	1.16484	up	SNORA27		ENSG00000200235	snoRNA	RFAM:RF00443
MI0016055	0.0315717	-1	0	1	down	hsa-mir-3655	100500820		miRNA	miRBase:MI0016055
NEWGENE3243	0.00276055	1.46641	0.552289	1.46641	up				snoRNA
NEWGENE3244	0.0347911	1.37236	0.456664	1.37236	up				tRNA
NEWGENE3245	0.0261395	1.18212	0.241379	1.18212	up				tRNA
chr5.trna22	3.99715e-07	1.28678	0.363771	1.28678	up	trna22			tRNA
NEWGENE1008	0.00135961	-1.18594	-0.246032	1.18594	down				Unknown
NEWGENE1009	0.0156028	-1.2076	-0.272147	1.2076	down				Unknown
NEWGENE1010	0	1.85319	0.890013	1.85319	up				Unknown
NEWGENE1012	0.000492645	1.21212	0.277535	1.21212	up				Unknown
NEWGENE3246	0.0323727	1.07928	0.110064	1.07928	up				miRNA
MI0000459	3.47019e-05	-1.0035	-0.00503921	1.0035	down	hsa-mir-143	406935	ENSG00000208035	miRNA	miRBase:MI0000459
MI0000461	0	-1.16685	-0.222625	1.16685	down	hsa-mir-145	406937	ENSG00000269936	miRNA	miRBase:MI0000461
MI0000786	4.14628e-09	-1.06338	-0.0886578	1.06338	down	hsa-mir-378a	494327		miRNA	miRBase:MI0000786
NEWGENE1013	6.64276e-09	1.17467	0.232252	1.17467	up				Unknown
NEWGENE3247	0.0369531	1.10811	0.148095	1.10811	up				miRNA
NEWGENE1014	5.12233e-09	1.0759	0.105548	1.0759	up				Unknown
NEWGENE1016	0.0214876	-1.12114	-0.164963	1.12114	down				Unknown
MI0006370	0.0185238	1.00893	0.0128205	1.00893	up	hsa-mir-1303	100302284	ENSG00000221552	miRNA	miRBase:MI0006370
NEWGENE1019	2.7557e-07	1.31979	0.400304	1.31979	up				Unknown
NEWGENE1020	0.0246009	1.12077	0.164494	1.12077	up				Unknown
NEWGENE1024	1.80826e-05	1.37163	0.455894	1.37163	up				Unknown
ENSG00000222626	0.00566664	1.22016	0.287074	1.22016	up	RNU2-48P		ENSG00000222626	snRNA	RFAM:RF00004
NEWGENE1026	0.0416765	1.07204	0.100358	1.07204	up				Unknown
NEWGENE1027	1.98256e-05	1.04074	0.0576123	1.04074	up				Unknown
MI0000477	0	-1.09804	-0.134929	1.09804	down	hsa-mir-146a	406938	ENSG00000253522	miRNA	miRBase:MI0000477
NEWGENE1029	3.63662e-08	1.10594	0.145272	1.10594	up				Unknown
NEWGENE1030	0.0327098	-1.01889	-0.0269969	1.01889	down				Unknown
ENSG00000239391	2.4777e-06	1.05518	0.0774922	1.05518	up	AC008415.1		ENSG00000239391	snRNA_pseudogene	RFAM:RF00100
NEWGENE3254	8.75856e-08	1.05669	0.0795571	1.05669	up				tRNA
MI0000109	0	-1.12783	-0.173549	1.12783	down	hsa-mir-103a-1	406895		miRNA	miRBase:MI0000109
NEWGENE1032	0	1.17245	0.229531	1.17245	up				Unknown
NEWGENE1034	6.66134e-16	1.1556	0.20864	1.1556	up				Unknown
NEWGENE1035	0	1.44901	0.535071	1.44901	up				Unknown
NEWGENE1037	0	1.46768	0.55354	1.46768	up				Unknown
NEWGENE3256	0.0483571	1.29659	0.374722	1.29659	up				miRNA
NEWGENE3260	0.0254479	1.08685	0.120152	1.08685	up				tRNA
ENSG00000212402	0.000801576	1.40201	0.487498	1.40201	up	SNORA74B	677841	ENSG00000212402	snoRNA	RFAM:RF00090
NEWGENE1038	0.00286986	1.03742	0.0530036	1.03742	up				Unknown
NEWGENE1039	0.0485056	-1.03564	-0.0505168	1.03564	down				Unknown
NEWGENE3261	7.65847e-10	1.39068	0.475788	1.39068	up				miRNA
NEWGENE3262	0.00239566	1.27954	0.355628	1.27954	up				tRNA
NEWGENE3263	0	1.07459	0.10378	1.07459	up				miRNA
NEWGENE1041	0	1.47531	0.561023	1.47531	up				Unknown
NEWGENE1042	0.0214203	1.13201	0.178886	1.13201	up				Unknown
NEWGENE1044	0	-1.16708	-0.222909	1.16708	down				Unknown
NEWGENE1045	2.84062e-05	-1.09209	-0.127087	1.09209	down				Unknown
NEWGENE1047	0.00147305	-1.114	-0.15575	1.114	down				Unknown
NEWGENE1049	0.00544577	1.10454	0.14345	1.10454	up				Unknown
NEWGENE3264	0.00329298	-1.18231	-0.24161	1.18231	down				miRNA
NEWGENE1051	1.35691e-07	1.2023	0.265797	1.2023	up				Unknown
MI0000802	1.74527e-12	1.03628	0.0514152	1.03628	up	hsa-mir-340	442908		miRNA	miRBase:MI0000802
NEWGENE3265	0	2.24117	1.16425	2.24117	up				miRNA
chr5.trna2	0.00060136	1.2235	0.291016	1.2235	up	trna2			tRNA
chr5.trna19	0	-1.01134	-0.016272	1.01134	down	trna19			tRNA
chr5.trna3	0	-1.00383	-0.00552005	1.00383	down	trna3			tRNA
chr5.trna18	0	1.00311	0.00448236	1.00311	up	trna18			tRNA
chr5.trna4	0.00119334	-1.1922	-0.253632	1.1922	down	trna4			tRNA
chr5.trna5	0.00316741	-1.15599	-0.209132	1.15599	down	trna5			tRNA
chr5.trna6	0	1.33273	0.414381	1.33273	up	trna6			tRNA
chr5.trna16	8.22675e-06	-1.10024	-0.137816	1.10024	down	trna16			tRNA
chr5.trna7	0.000723338	1.15725	0.210695	1.15725	up	trna7			tRNA
chr5.trna15	0.0235434	-1.23326	-0.302479	1.23326	down	trna15			tRNA
chr5.trna14	0.00320443	1.03262	0.0463064	1.03262	up	trna14			tRNA
chr5.trna13	0.0105756	1.42705	0.513033	1.42705	up	trna13			tRNA
chr5.trna8	0.018405	-1.21515	-0.281132	1.21515	down	trna8			tRNA
chr5.trna10	0	1.08409	0.116486	1.08409	up	trna10			tRNA
ENSG00000272296	0	1.37786	0.462434	1.37786	up	SNORD96A	619571	ENSG00000272296	snoRNA	RFAM:RF00055
ENSG00000264549	0	1.06516	0.0910694	1.06516	up	SNORD95	619570	ENSG00000264549	snoRNA	RFAM:RF00189
NEWGENE3267	0.0160759	-1.11694	-0.15955	1.11694	down				miRNA
NEWGENE925	0.00499931	1.14233	0.191975	1.14233	up				Unknown
NEWGENE927	0.000874744	-1.26865	-0.343293	1.26865	down				Unknown
ENSG00000240923	4.24554e-07	-1.26559	-0.339807	1.26559	down	AL034344.1		ENSG00000240923	scRNA_pseudogene
NEWGENE928	0.0309108	1.11964	0.163035	1.11964	up				Unknown
NEWGENE929	0	1.25439	0.326985	1.25439	up				Unknown
NEWGENE3269	0	1.16385	0.21891	1.16385	up				snoRNA
MI0016092	0.0315717	-1	0	1	down	hsa-mir-3691	100500900		miRNA	miRBase:MI0016092
NEWGENE3270	0.0375763	-1.11555	-0.157757	1.11555	down				miRNA
NEWGENE931	0	1.19955	0.262492	1.19955	up				Unknown
NEWGENE934	0.0256206	1.19108	0.252269	1.19108	up				Unknown
NEWGENE935	0.0367438	1.19402	0.255825	1.19402	up				Unknown
NEWGENE936	6.83897e-06	-1.09584	-0.132037	1.09584	down				Unknown
NEWGENE938	0	1.44326	0.52933	1.44326	up				Unknown
NEWGENE939	7.87373e-06	1.09629	0.132625	1.09629	up				Unknown
ENSG00000206702	0	1.64451	0.717654	1.64451	up	RNU1-11P		ENSG00000206702	snRNA	RFAM:RF00003
NEWGENE940	3.19103e-11	-1.11529	-0.157417	1.11529	down				Unknown
NEWGENE3275	0.0246536	1.05381	0.0756085	1.05381	up				miRNA
NEWGENE942	1.05991e-05	1.20682	0.271206	1.20682	up				Unknown
MI0017266	0.0315717	1.00893	0.0128205	1.00893	up	hsa-mir-4639	100616269		miRNA	miRBase:MI0017266
chr6.trna1	6.13287e-13	1.61573	0.692185	1.61573	up	trna1			tRNA
NEWGENE3277	0	-1.47526	-0.560973	1.47526	down				miRNA
ENSG00000240869	0.00177336	1.09056	0.125063	1.09056	up	AL136303.1		ENSG00000240869	scRNA_pseudogene	RFAM:RF00017
NEWGENE944	0.0035994	-1.31022	-0.389806	1.31022	down				Unknown
NEWGENE3278	3.00874e-05	1.07279	0.10137	1.07279	up				miRNA
NEWGENE947	4.06691e-07	1.32683	0.407986	1.32683	up				Unknown
NEWGENE3280	3.19335e-07	-1.03354	-0.0475907	1.03354	down				miRNA
chr6.trna2	2.22045e-16	1.15753	0.211052	1.15753	up	trna2			tRNA
NEWGENE951	1.83298e-05	1.23011	0.29879	1.23011	up				Unknown
chr6.trna172	0.00837242	1.27477	0.350237	1.27477	up	trna172			tRNA
chr6.trna171	0.0139804	1.2027	0.266274	1.2027	up	trna171			tRNA
chr6.trna170	2.13916e-06	1.11522	0.157333	1.11522	up	trna170			tRNA
chr6.trna6	4.51171e-10	1.27727	0.353063	1.27727	up	trna6			tRNA
chr6.trna169	0.0141904	-1.03198	-0.0454099	1.03198	down	trna169			tRNA
chr6.trna168	1.76838e-06	1.11778	0.160637	1.11778	up	trna168			tRNA
NEWGENE952	0.000692532	-1.14095	-0.19024	1.14095	down				Unknown
chr6.trna167	1.70554e-08	1.65428	0.726205	1.65428	up	trna167			tRNA
chr6.trna8	5.90509e-10	1.26837	0.342977	1.26837	up	trna8			tRNA
chr6.trna9	0	1.13837	0.186974	1.13837	up	trna9			tRNA
chr6.trna13	0.0443034	-1.16981	-0.22628	1.16981	down	trna13			tRNA
chr6.trna166	0.00199412	-1.10807	-0.148051	1.10807	down	trna166			tRNA
chr6.trna15	0.01177	1.04481	0.0632411	1.04481	up	trna15			tRNA
chr6.trna19	2.98975e-07	1.12351	0.168015	1.12351	up	trna19			tRNA
chr6.trna165	0.00734925	1.16867	0.224871	1.16867	up	trna165			tRNA
chr6.trna25	0.0315717	1.00893	0.0128205	1.00893	up	trna25			tRNA
chr6.trna28	0.00563395	1.17789	0.236203	1.17789	up	trna28			tRNA
chr6.trna159	0.0185238	1.01793	0.025641	1.01793	up	trna159			tRNA
chr6.trna33	0.0251711	1.16466	0.219911	1.16466	up	trna33			tRNA
chr6.trna34	5.70914e-09	1.71655	0.779514	1.71655	up	trna34			tRNA
chr6.trna158	0.00907621	1.25411	0.326663	1.25411	up	trna158			tRNA
chr6.trna35	4.42946e-11	-1.42002	-0.505908	1.42002	down	trna35			tRNA
chr6.trna36	0.0364887	1.18085	0.239823	1.18085	up	trna36			tRNA
chr6.trna37	0	-1.13887	-0.187598	1.13887	down	trna37			tRNA
ENSG00000244396	0.0131311	-1	0	1	down	AL021808.1		ENSG00000244396	tRNA_pseudogene	RFAM:RF00005
chr6.trna153	0.000795992	1.23356	0.302833	1.23356	up	trna153			tRNA
chr6.trna42	0.0240936	-1.10025	-0.137826	1.10025	down	trna42			tRNA
chr6.trna43	2.44249e-14	1.16984	0.226308	1.16984	up	trna43			tRNA
chr6.trna44	0.00883138	1.09816	0.135093	1.09816	up	trna44			tRNA
chr6.trna45	0.00150489	1.03962	0.0560548	1.03962	up	trna45			tRNA
chr6.trna47	0.0485547	1.08074	0.112016	1.08074	up	trna47			tRNA
chr6.trna48	0.00064775	1.04579	0.0645923	1.04579	up	trna48			tRNA
chr6.trna148	0.0146604	1.14113	0.19046	1.14113	up	trna148			tRNA
chr6.trna49	5.92312e-06	1.50374	0.588551	1.50374	up	trna49			tRNA
chr6.trna147	0.0223327	1.63746	0.711463	1.63746	up	trna147			tRNA
chr6.trna51	0	1.84116	0.880611	1.84116	up	trna51			tRNA
chr6.trna141	0.000209873	1.10823	0.148255	1.10823	up	trna141			tRNA
chr6.trna140	0.00024783	1.07226	0.100654	1.07226	up	trna140			tRNA
chr6.trna57	0.012044	1.27077	0.3457	1.27077	up	trna57			tRNA
chr6.trna138	2.42115e-08	1.23429	0.303685	1.23429	up	trna138			tRNA
chr6.trna137	0	1.06635	0.0926793	1.06635	up	trna137			tRNA
NEWGENE967	1.15979e-05	1.30996	0.389525	1.30996	up				Unknown
chr6.trna136	0	-1.47282	-0.558577	1.47282	down	trna136			tRNA
chr6.trna135	1.45606e-08	1.66391	0.734578	1.66391	up	trna135			tRNA
chr6.trna61	0	1.11527	0.157391	1.11527	up	trna61			tRNA
chr6.trna129	0	1.48687	0.572282	1.48687	up	trna129			tRNA
chr6.trna128	2.65363e-10	1.24976	0.321646	1.24976	up	trna128			tRNA
chr6.trna126	0.000600724	1.04637	0.0653936	1.04637	up	trna126			tRNA
chr6.trna65	1.04426e-10	1.18335	0.242879	1.18335	up	trna65			tRNA
chr6.trna66	0.038733	-1.28717	-0.364201	1.28717	down	trna66			tRNA
chr6.trna121	1.7618e-07	1.66024	0.731395	1.66024	up	trna121			tRNA
chr6.trna119	0.00782356	-1.23355	-0.302821	1.23355	down	trna119			tRNA
chr6.trna70	0.00940583	1.21112	0.276343	1.21112	up	trna70			tRNA
chr6.trna114	0.0318734	1.3248	0.405774	1.3248	up	trna114			tRNA
chr6.trna113	0.0314704	-1.11367	-0.15532	1.11367	down	trna113			tRNA
chr6.trna108	0.00217739	1.24715	0.318641	1.24715	up	trna108			tRNA
chr6.trna107	0.0273063	1.11744	0.160199	1.11744	up	trna107			tRNA
chr6.trna101	1.39462e-05	-1.08101	-0.112374	1.08101	down	trna101			tRNA
chr6.trna73	0.0167567	1.32129	0.401948	1.32129	up	trna73			tRNA
chr6.trna100	1.39211e-05	1.13123	0.177895	1.13123	up	trna100			tRNA
chr6.trna74	6.44606e-05	1.3228	0.403593	1.3228	up	trna74			tRNA
chr6.trna99	4.66294e-15	1.76468	0.819406	1.76468	up	trna99			tRNA
chr6.trna96	0.000196443	1.02702	0.0384615	1.02702	up	trna96			tRNA
chr6.trna77	0	-1.76673	-0.821082	1.76673	down	trna77			tRNA
chr6.trna78	0.0401219	-1.00221	-0.00318129	1.00221	down	trna78			tRNA
ENSG00000201330	3.0996e-07	1.21103	0.276236	1.21103	up	SNORD32B	692092	ENSG00000201330	snoRNA	RFAM:RF00133
ENSG00000199290	2.26087e-09	-1.20269	-0.266271	1.20269	down	Y_RNA		ENSG00000199290	scRNA	RFAM:RF00019
NEWGENE1004	0.000612638	-1.08483	-0.117468	1.08483	down				Unknown
ENSG00000201988	0.0185238	1.01793	0.025641	1.01793	up	Y_RNA		ENSG00000201988	scRNA	RFAM:RF00019
NEWGENE1007	7.52864e-12	1.18759	0.248038	1.18759	up				Unknown
ENSG00000201785	0.0114935	1.29264	0.370321	1.29264	up	SNORD117	692233	ENSG00000201785	snoRNA	RFAM:RF00137
ENSG00000201555	8.08798e-10	1.04263	0.0602275	1.04263	up	Y_RNA		ENSG00000201555	scRNA	RFAM:RF00019
ENSG00000201823	0	1.60155	0.679466	1.60155	up	SNORD48		ENSG00000201823	snoRNA	RFAM:RF00282
ENSG00000201754	2.37123e-07	1.54178	0.624595	1.54178	up	SNORD52	26797	ENSG00000201754	snoRNA	RFAM:RF00276
NEWGENE1142	0	1.47327	0.559025	1.47327	up				Unknown
NEWGENE1187	0	1.45963	0.545598	1.45963	up				Unknown
ENSG00000200706	3.23718e-07	1.47069	0.556492	1.47069	up	SNORD45		ENSG00000200706	snoRNA	RFAM:RF00279
NEWGENE1189	0.00696261	1.14401	0.194098	1.14401	up				Unknown
NEWGENE1191	5.91762e-07	-1.5542	-0.636168	1.5542	down				Unknown
NEWGENE1192	2.21454e-11	1.08662	0.119841	1.08662	up				Unknown
NEWGENE1195	0	1.43261	0.518644	1.43261	up				Unknown
NEWGENE1197	5.14585e-07	1.14345	0.193389	1.14345	up				Unknown
NEWGENE1198	5.86198e-14	1.12178	0.165788	1.12178	up				Unknown
NEWGENE1199	1.96503e-08	-1.17946	-0.238126	1.17946	down				Unknown
NEWGENE3297	1.085e-10	1.56614	0.647212	1.56614	up				snoRNA
NEWGENE3298	1.97531e-12	1.62563	0.701	1.62563	up				snoRNA
NEWGENE1200	3.42616e-10	-1.22025	-0.287175	1.22025	down				Unknown
NEWGENE3300	2.67683e-09	1.61473	0.691295	1.61473	up				miRNA
chr6.trna94	0.00585705	1.06884	0.0960494	1.06884	up	trna94			tRNA
chr6.trna80	0.00232944	1.20696	0.271374	1.20696	up	trna80			tRNA
chr6.trna91	0.000196443	1.04843	0.0682298	1.04843	up	trna91			tRNA
NEWGENE3302	0.0404756	1.20686	0.271258	1.20686	up				miRNA
NEWGENE1202	0.00144131	-1.23842	-0.308498	1.23842	down				Unknown
NEWGENE1205	3.65062e-05	-1.24298	-0.313801	1.24298	down				Unknown
NEWGENE3304	3.61505e-05	-1.14097	-0.190258	1.14097	down				miRNA
NEWGENE1206	2.15357e-09	-1.08733	-0.120794	1.08733	down				Unknown
MI0000254	0	1.15938	0.213352	1.15938	up	hsa-mir-30c-2	407032	ENSG00000199094	miRNA	miRBase:MI0000254
NEWGENE1207	2.52733e-06	1.0882	0.12194	1.0882	up				Unknown
NEWGENE1209	7.36478e-07	1.34539	0.428029	1.34539	up				Unknown
NEWGENE3305	0.00426404	1.03973	0.0562039	1.03973	up				miRNA
NEWGENE1212	4.94183e-08	1.13111	0.17774	1.13111	up				Unknown
NEWGENE3306	1.08136e-13	1.52438	0.608224	1.52438	up				miRNA
NEWGENE1213	9.99201e-16	-1.30306	-0.381899	1.30306	down				Unknown
NEWGENE1214	1.91477e-06	-1.04408	-0.0622292	1.04408	down				Unknown
NEWGENE3307	0.0463473	1.18425	0.243969	1.18425	up				tRNA
NEWGENE3308	1.95066e-13	1.14622	0.196879	1.14622	up				snoRNA
NEWGENE1215	0	1.12249	0.1667	1.12249	up				Unknown
ENSG00000222145	0.0109696	-1	0	1	down	SNORA73		ENSG00000222145	snoRNA	RFAM:RF00045
ENSG00000223001	0	2.28175	1.19014	2.28175	up	RNU2-61P		ENSG00000223001	snRNA	RFAM:RF00004
ENSG00000252891	0.00654213	1.01793	0.025641	1.01793	up	Y_RNA		ENSG00000252891	scRNA	RFAM:RF00019
NEWGENE1219	2.23183e-06	1.24064	0.311084	1.24064	up				Unknown
NEWGENE3309	0	-1.3812	-0.465923	1.3812	down				tRNA
NEWGENE1221	0.0078233	1.2195	0.286284	1.2195	up				Unknown
NEWGENE1223	0.000176616	1.23909	0.309282	1.23909	up				Unknown
NEWGENE3311	2.42603e-09	1.14897	0.200341	1.14897	up				tRNA
NEWGENE1224	0.0149978	-1.11435	-0.156201	1.11435	down				Unknown
NEWGENE3313	0	1.02019	0.0288341	1.02019	up				miRNA
NEWGENE1225	0.000159129	1.17873	0.23723	1.17873	up				Unknown
ENSG00000199303	6.58056e-07	1.50211	0.586989	1.50211	up	Y_RNA		ENSG00000199303	scRNA	RFAM:RF00019
NEWGENE1228	0.000117261	1.19351	0.255206	1.19351	up				Unknown
NEWGENE1229	0	1.3276	0.408821	1.3276	up				Unknown
NEWGENE1230	0.00377231	1.18406	0.24374	1.18406	up				Unknown
NEWGENE1234	9.92158e-10	1.29803	0.376329	1.29803	up				Unknown
NEWGENE3315	2.92849e-09	1.30653	0.385744	1.30653	up				miRNA
ENSG00000200314	0.0040497	1.06287	0.0879717	1.06287	up	Y_RNA		ENSG00000200314	scRNA	RFAM:RF00019
ENSG00000238490	1.36315e-07	1.17724	0.235413	1.17724	up	Y_RNA		ENSG00000238490	scRNA	RFAM:RF00019
NEWGENE1236	0.000614019	1.13559	0.183442	1.13559	up				Unknown
NEWGENE3318	0	1.08506	0.117769	1.08506	up				miRNA
NEWGENE1237	0.000823161	-1.08261	-0.114508	1.08261	down				Unknown
NEWGENE1238	3.49257e-08	-1.1643	-0.219465	1.1643	down				Unknown
NEWGENE3320	0.000581166	-1.09169	-0.126558	1.09169	down				miRNA
NEWGENE1242	3.73035e-14	1.06307	0.088239	1.06307	up				Unknown
NEWGENE1243	0.00138626	1.07134	0.0994148	1.07134	up				Unknown
NEWGENE1244	0	1.22983	0.298462	1.22983	up				Unknown
ENSG00000222649	3.64042e-13	1.04158	0.0587773	1.04158	up	Y_RNA		ENSG00000222649	scRNA	RFAM:RF00019
NEWGENE3321	3.0201e-07	1.37374	0.458108	1.37374	up				tRNA
NEWGENE1246	5.00774e-05	-1.12899	-0.175028	1.12899	down				Unknown
ENSG00000201379	4.8117e-05	1.21186	0.277225	1.21186	up	RNU4-76P		ENSG00000201379	snRNA	RFAM:RF00015
NEWGENE1247	0.000941279	1.37522	0.459666	1.37522	up				Unknown
NEWGENE3322	0.0120244	-1.18706	-0.247394	1.18706	down				tRNA
chr6.trna87	0	-1.67406	-0.743351	1.67406	down	trna87			tRNA
NEWGENE1253	0.0296151	1.08306	0.115113	1.08306	up				Unknown
NEWGENE1254	0.00866353	1.01916	0.0273863	1.01916	up				Unknown
ENSG00000202438	0.023761	1.09772	0.134511	1.09772	up	Y_RNA		ENSG00000202438	scRNA	RFAM:RF00019
NEWGENE1256	0.0116542	-1.13255	-0.179575	1.13255	down				Unknown
NEWGENE1276	0.0472634	1.12814	0.173945	1.12814	up				Unknown
ENSG00000221500	0	1.192	0.25339	1.192	up	SNORD100	594838	ENSG00000221500	snoRNA	RFAM:RF00609
ENSG00000200534	2.66435e-07	1.10273	0.141079	1.10273	up	SNORA33	594839	ENSG00000200534	snoRNA	RFAM:RF00438
ENSG00000201309	0.0104106	-1.05702	-0.08	1.05702	down	Y_RNA		ENSG00000201309	scRNA	RFAM:RF00019
NEWGENE1313	2.50429e-05	1.38002	0.464693	1.38002	up				Unknown
NEWGENE1314	0.021098	1.1947	0.256647	1.1947	up				Unknown
NEWGENE1315	0	1.2816	0.357942	1.2816	up				Unknown
chr6.trna82	0.0445791	1.09912	0.136345	1.09912	up	trna82			tRNA
NEWGENE3327	0.0350376	-1.0008	-0.00114934	1.0008	down				miRNA
NEWGENE1318	3.41058e-06	1.2694	0.344147	1.2694	up				Unknown
NEWGENE1319	0.00225729	1.20608	0.270321	1.20608	up				Unknown
chr6.trna83	0	1.36276	0.446533	1.36276	up	trna83			tRNA
NEWGENE1320	5.23388e-11	1.40352	0.489045	1.40352	up				Unknown
NEWGENE1321	0	1.36293	0.446714	1.36293	up				Unknown
NEWGENE1323	6.48651e-10	-1.11821	-0.161194	1.11821	down				Unknown
ENSG00000252244	0.000166495	-1.15361	-0.206155	1.15361	down	RNU7-3P		ENSG00000252244	snRNA	RFAM:RF00066
NEWGENE3328	0.00127127	1.11226	0.153497	1.11226	up				miRNA
ENSG00000201628	0.0358657	1.07886	0.10951	1.07886	up	RNU4-7P		ENSG00000201628	snRNA	RFAM:RF00015
NEWGENE1325	0.00225142	-1.13726	-0.185559	1.13726	down				Unknown
NEWGENE3329	0	-1.38601	-0.470941	1.38601	down				miRNA
NEWGENE1328	0.0406906	1.05233	0.0735835	1.05233	up				Unknown
NEWGENE1331	3.65017e-06	1.17689	0.234978	1.17689	up				Unknown
NEWGENE1332	2.9599e-07	1.17465	0.232231	1.17465	up				Unknown
ENSG00000207392	9.77668e-07	1.36527	0.449182	1.36527	up	SNORA20	677806	ENSG00000207392	snoRNA	RFAM:RF00401
NEWGENE1334	8.39515e-07	1.28865	0.365859	1.28865	up				Unknown
NEWGENE1335	1.55431e-15	1.35496	0.43825	1.35496	up				Unknown
NEWGENE3333	0.0483571	1.19364	0.255365	1.19364	up				miRNA
NEWGENE1337	1.88871e-12	-1.01694	-0.0242358	1.01694	down				Unknown
NEWGENE3334	0.000145395	-1.1572	-0.210635	1.1572	down				miRNA
NEWGENE1338	0.0171856	1.12866	0.174607	1.12866	up				Unknown
MI0016596	0.0185238	-1	0	1	down	hsa-mir-3939	100500857	ENSG00000265828	miRNA	miRBase:MI0016596
NEWGENE1339	0	1.16761	0.223555	1.16761	up				Unknown
NEWGENE1340	0.00217293	-1.17603	-0.233927	1.17603	down				Unknown
NEWGENE1342	0	-1.28298	-0.359502	1.28298	down				Unknown
NEWGENE1345	0.000137778	1.13162	0.178394	1.13162	up				Unknown
NEWGENE1054	0.000223991	1.06939	0.0967911	1.06939	up				Unknown
NEWGENE1055	0.0201444	1.12584	0.170999	1.12584	up				Unknown
NEWGENE1056	0.0353307	-1.00058	-0.000836	1.00058	down				Unknown
MI0000815	0.000207094	-1.08851	-0.122353	1.08851	down	hsa-mir-339	442907		miRNA	miRBase:MI0000815
NEWGENE3336	0	1.43799	0.524052	1.43799	up				miRNA
NEWGENE3337	0.000145558	1.15561	0.208651	1.15561	up				miRNA
NEWGENE1057	0.0124171	1.13151	0.178243	1.13151	up				Unknown
NEWGENE1058	0	-1.1472	-0.198114	1.1472	down				Unknown
NEWGENE3338	0	1.62772	0.70285	1.62772	up				tRNA
NEWGENE1059	8.69156e-08	1.22328	0.29076	1.22328	up				Unknown
ENSG00000206895	0.00804421	1.09203	0.127011	1.09203	up	Y_RNA		ENSG00000206895	scRNA	RFAM:RF00019
NEWGENE3341	0.0412892	1.11294	0.154378	1.11294	up				miRNA
NEWGENE3342	0.000350088	1.13003	0.176362	1.13003	up				snoRNA
NEWGENE3345	0.018027	1.12052	0.164164	1.12052	up				tRNA
ENSG00000201990	0.0131311	-1	0	1	down	Y_RNA		ENSG00000201990	scRNA	RFAM:RF00019
ENSG00000202273	0.00468312	1.17839	0.236814	1.17839	up	Y_RNA		ENSG00000202273	scRNA	RFAM:RF00019
NEWGENE1062	8.28898e-10	1.22143	0.288567	1.22143	up				Unknown
NEWGENE3347	1.12313e-10	1.10919	0.14951	1.10919	up				miRNA
NEWGENE1063	0	-1.14611	-0.19674	1.14611	down				Unknown
NEWGENE3348	7.06322e-05	-1.08625	-0.119355	1.08625	down				miRNA
NEWGENE3349	0.0305517	-1.27769	-0.353535	1.27769	down				miRNA
ENSG00000252374	0	1.04758	0.0670581	1.04758	up	Y_RNA		ENSG00000252374	scRNA	RFAM:RF00019
NEWGENE1068	0.000263606	1.12548	0.170534	1.12548	up				Unknown
NEWGENE1071	4.44706e-07	1.13512	0.182847	1.13512	up				Unknown
NEWGENE1072	0.00586704	1.10382	0.142505	1.10382	up				Unknown
NEWGENE3351	0	2.0151	1.01085	2.0151	up				miRNA
NEWGENE1073	0.000162089	1.14153	0.190969	1.14153	up				Unknown
ENSG00000242789	0.0270873	1.04316	0.0609601	1.04316	up	AC005251.2		ENSG00000242789	scRNA_pseudogene
NEWGENE1076	3.01981e-14	1.41053	0.496241	1.41053	up				Unknown
NEWGENE1078	0.0248361	1.17597	0.233856	1.17597	up				Unknown
MI0000253	0	1.17555	0.233341	1.17555	up	hsa-mir-148a	406940	ENSG00000199085	miRNA	miRBase:MI0000253
NEWGENE1080	0.000257664	1.18335	0.242879	1.18335	up				Unknown
NEWGENE1082	0.0445791	1.06618	0.0924514	1.06618	up				Unknown
NEWGENE1084	0.0209485	1.06937	0.0967575	1.06937	up				Unknown
NEWGENE1085	6.33587e-06	1.21499	0.280944	1.21499	up				Unknown
NEWGENE1086	0.00731178	1.26446	0.338524	1.26446	up				Unknown
ENSG00000201432	0.0109696	1.00893	0.0128205	1.00893	up	Y_RNA		ENSG00000201432	scRNA	RFAM:RF00019
NEWGENE1088	0.00127127	1.08453	0.117073	1.08453	up				Unknown
ENSG00000200113	0.0315717	-1	0	1	down	SNORA51		ENSG00000200113	snoRNA	RFAM:RF00432
NEWGENE1089	0	-1.34299	-0.425451	1.34299	down				Unknown
ENSG00000206947	0.000952402	1.2569	0.329875	1.2569	up	SNORA20		ENSG00000206947	snoRNA	RFAM:RF00401
NEWGENE1090	1.68239e-05	1.18179	0.240977	1.18179	up				Unknown
NEWGENE1091	0.0434893	-1.08301	-0.115046	1.08301	down				Unknown
NEWGENE1092	0	1.58738	0.666647	1.58738	up				Unknown
NEWGENE1093	0.0156028	-1.10753	-0.147348	1.10753	down				Unknown
NEWGENE1095	0.00270539	1.13584	0.183762	1.13584	up				Unknown
NEWGENE3354	0.0262756	1.07618	0.105917	1.07618	up				snoRNA
ENSG00000206838	0.00435467	1.29828	0.3766	1.29828	up	SNORA5A	654319	ENSG00000206838	snoRNA	RFAM:RF00392
NEWGENE1096	0.000514135	1.29973	0.378213	1.29973	up				Unknown
NEWGENE1097	0	-1.30387	-0.382797	1.30387	down				Unknown
NEWGENE1098	1.96018e-07	1.37753	0.462083	1.37753	up				Unknown
NEWGENE1102	0.000255126	1.28088	0.357133	1.28088	up				Unknown
NEWGENE1103	0.0325628	-1.10801	-0.147973	1.10801	down				Unknown
NEWGENE1105	9.42497e-06	1.14478	0.195068	1.14478	up				Unknown
NEWGENE1107	0.00732036	1.12524	0.170237	1.12524	up				Unknown
NEWGENE3355	0	1.70513	0.769882	1.70513	up				miRNA
ENSG00000206603	0.0039235	1.00893	0.0128205	1.00893	up	SNORA22		ENSG00000206603	snoRNA	RFAM:RF00414
NEWGENE1109	6.32558e-07	-1.14892	-0.200284	1.14892	down				Unknown
NEWGENE3357	1.16352e-06	1.22238	0.289696	1.22238	up				tRNA
ENSG00000207062	0.00772646	1.36329	0.447096	1.36329	up	SNORA15		ENSG00000207062	snoRNA	RFAM:RF00398
ENSG00000206785	0.00772646	1.36329	0.447096	1.36329	up	SNORA15		ENSG00000206785	snoRNA	RFAM:RF00398
NEWGENE1112	8.98562e-05	-1.06589	-0.092054	1.06589	down				Unknown
ENSG00000201565	0.000867082	1.01793	0.025641	1.01793	up	Y_RNA		ENSG00000201565	scRNA	RFAM:RF00019
NEWGENE1113	2.79899e-11	-1.11811	-0.161063	1.11811	down				Unknown
NEWGENE3359	0	1.60995	0.687017	1.60995	up				miRNA
ENSG00000200857	0.00236371	1.00893	0.0128205	1.00893	up	Y_RNA		ENSG00000200857	scRNA	RFAM:RF00019
NEWGENE1117	0.0178017	1.18848	0.249115	1.18848	up				Unknown
ENSG00000202035	0.00142936	1.02324	0.0331405	1.02324	up	Y_RNA		ENSG00000202035	scRNA	RFAM:RF00019
NEWGENE1118	2.27732e-10	1.34153	0.423875	1.34153	up				Unknown
ENSG00000202021	0.0378765	-1.02811	-0.04	1.02811	down	Y_RNA		ENSG00000202021	scRNA	RFAM:RF00019
ENSG00000199641	0.0378765	-1.02811	-0.04	1.02811	down	Y_RNA		ENSG00000199641	scRNA	RFAM:RF00019
ENSG00000202178	0.0378765	-1.02811	-0.04	1.02811	down	Y_RNA		ENSG00000202178	scRNA	RFAM:RF00019
ENSG00000199870	0.0378765	-1.02811	-0.04	1.02811	down	Y_RNA		ENSG00000199870	scRNA	RFAM:RF00019
ENSG00000201138	0.0488629	1.02996	0.0425888	1.02996	up	Y_RNA		ENSG00000201138	scRNA	RFAM:RF00019
ENSG00000200874	0.000867082	1.01793	0.025641	1.01793	up	Y_RNA		ENSG00000200874	scRNA	RFAM:RF00019
NEWGENE1120	1.31196e-05	1.32539	0.406417	1.32539	up				Unknown
NEWGENE1121	0.000444068	-1.09951	-0.136859	1.09951	down				Unknown
ENSG00000238560	0.000120227	1.04701	0.0662811	1.04701	up	Y_RNA		ENSG00000238560	scRNA	RFAM:RF00019
NEWGENE1122	7.18949e-11	1.14183	0.191344	1.14183	up				Unknown
NEWGENE1124	4.94183e-08	1.0821	0.113828	1.0821	up				Unknown
NEWGENE1126	0.0265334	1.08575	0.118696	1.08575	up				Unknown
NEWGENE1129	0.000717018	1.21034	0.275413	1.21034	up				Unknown
NEWGENE1130	2.93284e-11	-1.29578	-0.373819	1.29578	down				Unknown
NEWGENE1131	1.03614e-05	1.0993	0.136579	1.0993	up				Unknown
NEWGENE3361	0.0403566	1.29997	0.378474	1.29997	up				tRNA
ENSG00000207094	0.0186898	-1.06304	-0.0881916	1.06304	down	SNORA67		ENSG00000207094	snoRNA	RFAM:RF00272
NEWGENE1133	5.34905e-13	-1.0041	-0.00589725	1.0041	down				Unknown
NEWGENE1134	0.0013633	1.1591	0.213009	1.1591	up				Unknown
ENSG00000238739	0.0056209	1.1481	0.199254	1.1481	up	snoU13		ENSG00000238739	snoRNA	RFAM:RF01210
NEWGENE3364	0	3.4201	1.77404	3.4201	up				miRNA
NEWGENE1139	0.00136662	-1.28727	-0.364316	1.28727	down				Unknown
MI0015999	0	1.29371	0.371513	1.29371	up	hsa-mir-3609	100500819		miRNA	miRBase:MI0015999
NEWGENE3365	0.00910083	1.20456	0.268505	1.20456	up				tRNA
chr7.trna1	0.00267272	1.22918	0.297701	1.22918	up	trna1			tRNA
MI0000082	1.33914e-05	1.0405	0.0572787	1.0405	up	hsa-mir-25	407014		miRNA	miRBase:MI0000082
MI0000095	0	-1.04616	-0.065105	1.04616	down	hsa-mir-93	407050		miRNA	miRBase:MI0000095
MI0000734	0	1.05449	0.0765406	1.05449	up	hsa-mir-106b	406900		miRNA	miRBase:MI0000734
NEWGENE1141	0	1.07098	0.0989325	1.07098	up				Unknown
NEWGENE3367	0.0487347	-1.05819	-0.0815951	1.05819	down				miRNA
NEWGENE1143	7.62176e-08	1.31009	0.389661	1.31009	up				Unknown
NEWGENE1144	0.0185849	-1.01856	-0.0265269	1.01856	down				Unknown
ENSG00000200552	0.000120227	1.04701	0.0662811	1.04701	up	Y_RNA		ENSG00000200552	scRNA	RFAM:RF00019
ENSG00000252047	0	1.79053	0.840388	1.79053	up	Y_RNA		ENSG00000252047	scRNA	RFAM:RF00019
NEWGENE1148	2.24473e-06	1.19806	0.260703	1.19806	up				Unknown
NEWGENE3368	0.000331496	-1.03788	-0.0536445	1.03788	down				miRNA
NEWGENE1151	9.99391e-09	1.2376	0.307541	1.2376	up				Unknown
NEWGENE1152	4.58407e-09	1.51656	0.600804	1.51656	up				Unknown
NEWGENE1153	0.000119662	-1.09129	-0.126035	1.09129	down				Unknown
NEWGENE1154	0.0159088	1.18213	0.241383	1.18213	up				Unknown
NEWGENE1155	3.40621e-05	-1.43137	-0.517396	1.43137	down				Unknown
NEWGENE3370	1.15514e-05	1.31608	0.396242	1.31608	up				miRNA
NEWGENE1156	0.0013633	1.17262	0.229734	1.17262	up				Unknown
NEWGENE3371	0.000252197	1.25691	0.329882	1.25691	up				miRNA
NEWGENE3383	9.42497e-06	-1.01768	-0.0252833	1.01768	down				snoRNA
NEWGENE3391	0.0424332	1.02417	0.0344533	1.02417	up				snoRNA
NEWGENE3398	5.41789e-14	1.11515	0.157241	1.11515	up				miRNA
NEWGENE3414	0.000622518	1.2383	0.308359	1.2383	up				miRNA
NEWGENE3416	0.00325736	1.14977	0.201351	1.14977	up				miRNA
NEWGENE3418	0.0331225	1.0633	0.0885499	1.0633	up				snoRNA
NEWGENE3419	0.0445791	1.07609	0.105795	1.07609	up				miRNA
NEWGENE1157	0.0346148	1.05608	0.0787129	1.05608	up				Unknown
NEWGENE1158	0	1.05877	0.082388	1.05877	up				Unknown
NEWGENE1159	0	1.32423	0.405152	1.32423	up				Unknown
NEWGENE1161	1.96809e-12	-1.31826	-0.398639	1.31826	down				Unknown
NEWGENE3421	0.000283078	-1.1151	-0.157167	1.1151	down				miRNA
ENSG00000200629	0.0185238	1.00893	0.0128205	1.00893	up	Y_RNA		ENSG00000200629	scRNA	RFAM:RF00019
ENSG00000207184	0.0460228	-1.11689	-0.159492	1.11689	down	Y_RNA		ENSG00000207184	scRNA	RFAM:RF00019
NEWGENE1164	0.000171554	1.15517	0.208108	1.15517	up				Unknown
MI0000816	0.000313333	1.1865	0.246718	1.1865	up	hsa-mir-335	442904		miRNA	miRBase:MI0000816
MI0000087	0	-1.14934	-0.200806	1.14934	down	hsa-mir-29a	407021		miRNA	miRBase:MI0000087|RFAM:RF00074
MI0000105	0	-1.01803	-0.0257863	1.01803	down	hsa-mir-29b-1	407024	ENSG00000207748	miRNA	miRBase:MI0000105|RFAM:RF00074
NEWGENE1165	8.07845e-06	1.09412	0.129765	1.09412	up				Unknown
NEWGENE1166	0.00226986	-1.31021	-0.389793	1.31021	down				Unknown
NEWGENE3426	0	1.62981	0.704704	1.62981	up				miRNA
ENSG00000201009	0.000805355	1.01414	0.0202588	1.01414	up	SNORD46		ENSG00000201009	snoRNA	RFAM:RF00218
NEWGENE3427	1.05731e-08	1.53267	0.61605	1.53267	up				miRNA
NEWGENE1169	1.25098e-08	1.35282	0.435975	1.35282	up				Unknown
NEWGENE1170	0.0185521	-1.24241	-0.313136	1.24241	down				Unknown
NEWGENE1171	9.71466e-07	-1.11013	-0.150728	1.11013	down				Unknown
ENSG00000206705	0.0127662	-1.02811	-0.04	1.02811	down	Y_RNA		ENSG00000206705	scRNA	RFAM:RF00019
NEWGENE3428	0.00108762	1.12165	0.165626	1.12165	up				miRNA
NEWGENE1172	0.000852078	-1.13824	-0.186805	1.13824	down				Unknown
ENSG00000202072	0	-1.2617	-0.335372	1.2617	down	Y_RNA		ENSG00000202072	scRNA	RFAM:RF00019
chr7.trna3	0	1.552	0.634132	1.552	up	trna3			tRNA
NEWGENE1175	0	-1.42256	-0.508488	1.42256	down				Unknown
NEWGENE1177	1.38841e-09	1.15358	0.206113	1.15358	up				Unknown
ENSG00000212153	0.0146327	1.56422	0.645443	1.56422	up	RNU1-82P		ENSG00000212153	snRNA	RFAM:RF00003
NEWGENE3434	0.00377231	1.22606	0.294027	1.22606	up				miRNA
NEWGENE1179	4.01013e-13	-1.07083	-0.0987313	1.07083	down				Unknown
uc022aol.1	0.000242284	-1.21784	-0.284327	1.21784	down	piR-35549			piRNA	DQ597485
NEWGENE3436	4.87001e-06	-1.07946	-0.110315	1.07946	down				miRNA
NEWGENE3437	0	-1.05648	-0.0792599	1.05648	down				miRNA
NEWGENE3438	0	-1.32656	-0.407693	1.32656	down				snoRNA
NEWGENE3439	0	1.14911	0.200522	1.14911	up				snoRNA
NEWGENE3440	0	1.04932	0.0694576	1.04932	up				miRNA
chr7.trna10	0.0185238	1.00893	0.0128205	1.00893	up	trna10			tRNA
chr7.trna19	0.00142936	-1	0	1	down	trna19			tRNA
chr7.trna14	6.59668e-08	-1.10675	-0.146326	1.10675	down	trna14			tRNA
chr7.trna15	0.0315717	1.01793	0.025641	1.01793	up	trna15			tRNA
NEWGENE1349	1.69198e-12	1.1479	0.198995	1.1479	up				Unknown
NEWGENE1351	0.0033772	-1.07895	-0.109625	1.07895	down				Unknown
NEWGENE1352	0.00124002	1.16034	0.214548	1.16034	up				Unknown
MI0003760	2.08069e-05	1.03945	0.0558187	1.03945	up	hsa-mir-671	768213		miRNA	miRBase:MI0003760
NEWGENE1354	0.00127127	1.13052	0.176985	1.13052	up				Unknown
NEWGENE1356	0	-1.21917	-0.285901	1.21917	down				Unknown
NEWGENE1358	1.83977e-06	-1.23382	-0.303132	1.23382	down				Unknown
NEWGENE1361	0.00811941	1.15291	0.205282	1.15291	up				Unknown
NEWGENE3441	0.034732	1.10938	0.149757	1.10938	up				miRNA
NEWGENE3442	1.19904e-14	-1.10995	-0.150491	1.10995	down				miRNA
NEWGENE1370	2.14421e-05	1.06409	0.0896151	1.06409	up				Unknown
NEWGENE1373	0.0236235	-1.09833	-0.135314	1.09833	down				Unknown
NEWGENE1374	1.193e-05	1.17403	0.231469	1.17403	up				Unknown
NEWGENE1376	2.24427e-07	1.18222	0.241498	1.18222	up				Unknown
NEWGENE1377	1.42911e-05	1.10558	0.144799	1.10558	up				Unknown
NEWGENE3443	0.0018635	1.21999	0.286872	1.21999	up				miRNA
NEWGENE1258	0.00248031	1.19676	0.259132	1.19676	up				Unknown
ENSG00000244566	0	-1.55878	-0.640413	1.55878	down	AF238378.1		ENSG00000244566	tRNA_pseudogene
NEWGENE1259	0.0484319	-1.04902	-0.0690368	1.04902	down				Unknown
NEWGENE1260	0.0129205	1.09305	0.128356	1.09305	up				Unknown
NEWGENE1261	0.0045606	1.2479	0.319498	1.2479	up				Unknown
NEWGENE3444	7.19305e-05	1.21775	0.284216	1.21775	up				miRNA
MI0003609	0.000196443	1.03237	0.0459611	1.03237	up	hsa-mir-597	693182		miRNA	miRBase:MI0003609
MI0003610	0.00877641	1.12625	0.171523	1.12625	up	hsa-mir-598	693183		miRNA	miRBase:MI0003610
ENSG00000239834	0	-1.60136	-0.679297	1.60136	down	AC123777.1		ENSG00000239834	tRNA_pseudogene
NEWGENE3446	3.41368e-10	1.1845	0.244283	1.1845	up				miRNA
NEWGENE1267	1.12843e-07	1.35583	0.439175	1.35583	up				Unknown
NEWGENE1268	1.0745e-10	1.24351	0.314419	1.24351	up				Unknown
NEWGENE1269	1.02612e-05	-1.17037	-0.226959	1.17037	down				Unknown
MI0000542	0	-1.04259	-0.0601779	1.04259	down	hsa-mir-320a	407037	ENSG00000208037	miRNA	miRBase:MI0000542
NEWGENE3447	0	1.49554	0.580662	1.49554	up				miRNA
ENSG00000207201	3.25189e-08	1.07846	0.108967	1.07846	up	RNU1-148P		ENSG00000207201	snRNA	RFAM:RF00003
NEWGENE1270	0.000115846	-1.13315	-0.180338	1.13315	down				Unknown
NEWGENE1272	0.0242017	1.08801	0.121696	1.08801	up				Unknown
NEWGENE3449	3.48949e-10	-1.21753	-0.283956	1.21753	down				miRNA
NEWGENE1274	1.52767e-13	1.11888	0.162054	1.11888	up				Unknown
ENSG00000254172	0.000576741	1.17517	0.232869	1.17517	up	RNU5A-3P		ENSG00000254172	snRNA	RFAM:RF00020
NEWGENE1277	1.56972e-07	1.11189	0.153016	1.11189	up				Unknown
NEWGENE3450	0	-1.57252	-0.653076	1.57252	down				miRNA
NEWGENE1278	4.79113e-10	1.175	0.232656	1.175	up				Unknown
NEWGENE1279	0.00761999	1.0983	0.135272	1.0983	up				Unknown
NEWGENE3452	0	1.14697	0.197823	1.14697	up				miRNA
NEWGENE1283	2.12968e-08	-1.30515	-0.384214	1.30515	down				Unknown
NEWGENE1284	0.000651574	-1.145	-0.195349	1.145	down				Unknown
ENSG00000207258	0.0308503	1.13419	0.181666	1.13419	up	Y_RNA		ENSG00000207258	scRNA	RFAM:RF00019
NEWGENE1286	0.03572	1.37804	0.46262	1.37804	up				Unknown
NEWGENE1287	1.35012e-07	-1.01869	-0.0267192	1.01869	down				Unknown
NEWGENE3455	0.00172968	-1.06682	-0.0933146	1.06682	down				miRNA
NEWGENE1288	4.8117e-05	1.23832	0.308386	1.23832	up				Unknown
MI0002470	4.44089e-15	-1.10006	-0.137577	1.10006	down	hsa-mir-486	619554		miRNA	miRBase:MI0002470
MI0023622	1.25455e-14	-1.03531	-0.0500591	1.03531	down	hsa-mir-486-2			miRNA	miRBase:MI0023622
NEWGENE1291	1.86517e-14	1.12939	0.175539	1.12939	up				Unknown
NEWGENE1292	1.5022e-10	-1.11235	-0.153605	1.11235	down				Unknown
NEWGENE1294	0	1.17582	0.233673	1.17582	up				Unknown
NEWGENE3456	0.00614644	-1.0843	-0.116759	1.0843	down				miRNA
NEWGENE3457	0.000838668	1.10866	0.148812	1.10866	up				miRNA
NEWGENE1298	0.0160884	1.10097	0.138774	1.10097	up				Unknown
NEWGENE1299	1.57205e-11	1.31941	0.399892	1.31941	up				Unknown
NEWGENE1301	6.92497e-08	-1.23394	-0.303266	1.23394	down				Unknown
NEWGENE1302	1.60694e-12	1.10549	0.144685	1.10549	up				Unknown
NEWGENE3459	0	1.75834	0.814217	1.75834	up				tRNA
ENSG00000238650	0	1.29697	0.375147	1.29697	up	SNORD54	26795	ENSG00000238650	snoRNA	RFAM:RF01277
NEWGENE1304	0.0253281	1.25478	0.327437	1.25478	up				Unknown
NEWGENE3461	0.042221	-1.02689	-0.0382776	1.02689	down				miRNA
NEWGENE3462	9.21465e-11	1.12582	0.170974	1.12582	up				miRNA
NEWGENE1307	0.00203478	-1.2046	-0.26856	1.2046	down				Unknown
NEWGENE1309	0.00255733	-1.1355	-0.183326	1.1355	down				Unknown
NEWGENE1310	2.62856e-11	1.21879	0.285453	1.21879	up				Unknown
ENSG00000200714	8.48961e-11	1.28638	0.363317	1.28638	up	Y_RNA		ENSG00000200714	scRNA	RFAM:RF00019
chr8.trna6	0.00982038	-1.3108	-0.39045	1.3108	down	trna6			tRNA
ENSG00000201365	0.00480899	1.25079	0.322842	1.25079	up	Y_RNA		ENSG00000201365	scRNA	RFAM:RF00019
NEWGENE3463	0	1.65253	0.72468	1.65253	up				snoRNA
NEWGENE1346	0.000742535	1.20521	0.269285	1.20521	up				Unknown
ENSG00000240447	0	-1.11429	-0.156125	1.11429	down	AC011884.1		ENSG00000240447	tRNA_pseudogene
NEWGENE3465	2.13505e-05	1.09084	0.125444	1.09084	up				miRNA
NEWGENE3466	0	1.39938	0.484788	1.39938	up				miRNA
NEWGENE1348	6.54956e-11	1.20784	0.272431	1.20784	up				Unknown
NEWGENE1355	0	1.38353	0.468358	1.38353	up				Unknown
ENSG00000223220	0.0178441	-1.1218	-0.165812	1.1218	down	Y_RNA		ENSG00000223220	scRNA	RFAM:RF00019
NEWGENE1357	0	1.29682	0.374974	1.29682	up				Unknown
NEWGENE1360	0	1.36137	0.445057	1.36137	up				Unknown
NEWGENE1363	0.000848688	1.28766	0.364753	1.28766	up				Unknown
NEWGENE1366	8.61618e-05	-1.03569	-0.0505885	1.03569	down				Unknown
NEWGENE1369	0	1.17886	0.23739	1.17886	up				Unknown
NEWGENE3467	3.46342e-07	-1.09776	-0.134557	1.09776	down				miRNA
ENSG00000206649	1.05413e-05	1.03619	0.0512821	1.03619	up	SNORA20		ENSG00000206649	snoRNA	RFAM:RF00401
ENSG00000223327	9.33698e-13	1.20037	0.263478	1.20037	up	RNU2-71P		ENSG00000223327	snRNA	RFAM:RF00004
ENSG00000240690	0.000500948	-1.19226	-0.253697	1.19226	down	AC103817.1		ENSG00000240690	scRNA_pseudogene
NEWGENE1383	5.79758e-13	-1.13719	-0.185472	1.13719	down				Unknown
NEWGENE1385	0.0204069	1.04214	0.0595559	1.04214	up				Unknown
NEWGENE1386	1.08922e-07	1.1786	0.237075	1.1786	up				Unknown
MI0014177	0.0315717	-1	0	1	down	hsa-mir-3150a	100422964		miRNA	miRBase:MI0014177
chr8.trna11	0.00392755	1.27092	0.345868	1.27092	up	trna11			tRNA
NEWGENE3468	7.71355e-08	1.01931	0.0275895	1.01931	up				miRNA
NEWGENE1391	0.0479585	-1.00135	-0.00194377	1.00135	down				Unknown
ENSG00000207067	1.95481e-07	1.32117	0.401821	1.32117	up	SNORA72	26775	ENSG00000207067	snoRNA	RFAM:RF00139
NEWGENE1394	0.0015273	1.2826	0.359074	1.2826	up				Unknown
NEWGENE1395	0	1.39015	0.47524	1.39015	up				Unknown
ENSG00000212414	8.91615e-09	1.16583	0.22136	1.16583	up	SNORD77		ENSG00000212414	snoRNA	RFAM:RF00591
ENSG00000199667	0.00256488	1.24644	0.317812	1.24644	up	Y_RNA		ENSG00000199667	scRNA	RFAM:RF00019
NEWGENE1397	3.43756e-06	-1.34942	-0.432342	1.34942	down				Unknown
ENSG00000201216	0.0263496	-1.11263	-0.153976	1.11263	down	Y_RNA		ENSG00000201216	scRNA	RFAM:RF00019
NEWGENE3471	0.0221881	1.12069	0.164386	1.12069	up				tRNA
NEWGENE1398	0.0328813	-1.16976	-0.226207	1.16976	down				Unknown
NEWGENE1400	1.72726e-07	1.25507	0.327773	1.25507	up				Unknown
NEWGENE1401	1.5099e-14	-1.12715	-0.172677	1.12715	down				Unknown
NEWGENE1406	0.0227851	1.1095	0.149912	1.1095	up				Unknown
NEWGENE1407	0.00208006	-1.2567	-0.329639	1.2567	down				Unknown
NEWGENE1408	3.9968e-15	1.37733	0.461879	1.37733	up				Unknown
NEWGENE3473	1.08502e-10	1.64855	0.721199	1.64855	up				miRNA
NEWGENE1409	0.00114605	-1.31367	-0.393608	1.31367	down				Unknown
NEWGENE1410	1.65383e-07	1.25457	0.327194	1.25457	up				Unknown
NEWGENE3474	0.0319254	-1.06906	-0.0963399	1.06906	down				miRNA
NEWGENE1411	3.47199e-09	-1.29806	-0.376354	1.29806	down				Unknown
NEWGENE1412	8.07845e-06	1.08951	0.12368	1.08951	up				Unknown
NEWGENE1413	0.00758316	1.54368	0.626377	1.54368	up				Unknown
ENSG00000206776	0.0109696	-1	0	1	down	SNORA32		ENSG00000206776	snoRNA	RFAM:RF00421
NEWGENE1414	0.00769898	-1.18993	-0.250874	1.18993	down				Unknown
NEWGENE3475	0	1.22207	0.289323	1.22207	up				tRNA
chr8.trna10	0	1.60057	0.678589	1.60057	up	trna10			tRNA
NEWGENE3476	4.17553e-08	1.09166	0.126517	1.09166	up				miRNA
ENSG00000207110	0.0185238	-1	0	1	down	RNU1-106P		ENSG00000207110	snRNA	RFAM:RF00003
ENSG00000222501	0.000999336	1.13275	0.179836	1.13275	up	RNU4-25P		ENSG00000222501	snRNA	RFAM:RF00015
MI0006341	0.0185238	-1	0	1	down	hsa-mir-1208	100302281	ENSG00000221261	miRNA	miRBase:MI0006341
NEWGENE1420	5.33496e-05	1.14586	0.196435	1.14586	up				Unknown
NEWGENE1422	1.02141e-14	1.43149	0.517519	1.43149	up				Unknown
NEWGENE1423	0.0321719	-1.07625	-0.106008	1.07625	down				Unknown
NEWGENE3479	0	1.18164	0.240788	1.18164	up				snoRNA
MI0000441	0	1.01509	0.0216012	1.01509	up	hsa-mir-30b	407030	ENSG00000207582	miRNA	miRBase:MI0000441
NEWGENE1428	1.89341e-08	-1.17403	-0.231464	1.17403	down				Unknown
NEWGENE1429	0.00339053	1.05695	0.0799067	1.05695	up				Unknown
NEWGENE3482	0.0232395	1.13905	0.187826	1.13905	up				miRNA
NEWGENE1432	4.9021e-07	1.33897	0.421122	1.33897	up				Unknown
NEWGENE1435	0.00315065	1.10781	0.147715	1.10781	up				Unknown
NEWGENE1436	0.0294658	-1.22152	-0.288674	1.22152	down				Unknown
MI0000809	0	-1.07948	-0.110343	1.07948	down	hsa-mir-151a	442893		miRNA	miRBase:MI0000809
NEWGENE3484	7.85994e-12	1.23205	0.301058	1.23205	up				miRNA
NEWGENE1438	0.00851885	1.23225	0.301301	1.23225	up				Unknown
NEWGENE1439	0.0427826	1.09653	0.132951	1.09653	up				Unknown
NEWGENE1440	0.00605541	-1.06987	-0.0974374	1.06987	down				Unknown
NEWGENE1442	1.15041e-05	-1.09887	-0.136016	1.09887	down				Unknown
NEWGENE1443	0.000302054	1.09413	0.12979	1.09413	up				Unknown
NEWGENE1444	1.91633e-07	1.35475	0.438026	1.35475	up				Unknown
NEWGENE3485	0.000444531	1.06418	0.0897436	1.06418	up				miRNA
NEWGENE3487	0	1.32348	0.404338	1.32348	up				miRNA
NEWGENE1445	0.00482511	1.18181	0.241004	1.18181	up				Unknown
NEWGENE3488	5.11931e-07	1.18817	0.248742	1.18817	up				miRNA
NEWGENE1449	0.00546648	-1.13743	-0.185776	1.13743	down				Unknown
ENSG00000222973	0.00543213	1.18542	0.245398	1.18542	up	RNU2-25P		ENSG00000222973	snRNA	RFAM:RF00004
NEWGENE1450	0.00181106	-1.18198	-0.241209	1.18198	down				Unknown
NEWGENE1451	4.54549e-06	1.19375	0.255503	1.19375	up				Unknown
NEWGENE1452	0.00282956	-1.08536	-0.118175	1.08536	down				Unknown
MI0000739	0	-1.07928	-0.110069	1.07928	down	hsa-mir-101-2	406894		miRNA	miRBase:MI0000739
NEWGENE1453	0	1.16323	0.21814	1.16323	up				Unknown
NEWGENE1455	0.017416	-1.10352	-0.142109	1.10352	down				Unknown
NEWGENE3489	0.0353756	1.42462	0.510576	1.42462	up				tRNA
NEWGENE1458	0.00178519	1.13222	0.17915	1.13222	up				Unknown
NEWGENE1460	0.000191432	1.16328	0.218197	1.16328	up				Unknown
NEWGENE1461	0.00107901	1.36989	0.45406	1.36989	up				Unknown
ENSG00000207360	3.74567e-12	1.35437	0.437625	1.35437	up	RNU6-14P	100873746	ENSG00000207360	snRNA	RFAM:RF00026
NEWGENE1462	0.00757124	1.04369	0.0616924	1.04369	up				Unknown
NEWGENE1463	0.00138626	1.07115	0.0991633	1.07115	up				Unknown
NEWGENE1465	0.0236717	-1.0548	-0.0769686	1.0548	down				Unknown
NEWGENE1466	0	-1.44649	-0.532559	1.44649	down				Unknown
NEWGENE1468	1.08058e-07	1.30505	0.384104	1.30505	up				Unknown
NEWGENE1469	0.00146596	1.18717	0.247531	1.18717	up				Unknown
NEWGENE1470	0.0402864	1.19392	0.255707	1.19392	up				Unknown
ENSG00000202189	0.0109021	1.02324	0.0331405	1.02324	up	SNORA30		ENSG00000202189	snoRNA	RFAM:RF00415
ENSG00000199635	0.0167142	1.34177	0.424133	1.34177	up	Y_RNA		ENSG00000199635	scRNA	RFAM:RF00019
NEWGENE1472	0.00100819	-1.16592	-0.221471	1.16592	down				Unknown
NEWGENE1473	0.000657865	-1.0711	-0.0990995	1.0711	down				Unknown
NEWGENE1474	0.000499025	1.06623	0.0925122	1.06623	up				Unknown
NEWGENE1476	0.0362601	-1.05039	-0.0709294	1.05039	down				Unknown
NEWGENE1478	0.0259942	-1.07798	-0.108325	1.07798	down				Unknown
NEWGENE3492	2.89265e-10	1.09081	0.125402	1.09081	up				miRNA
NEWGENE1479	0.000614019	1.14966	0.201202	1.14966	up				Unknown
NEWGENE1480	2.13395e-08	1.16723	0.223085	1.16723	up				Unknown
NEWGENE3493	2.79072e-05	1.26455	0.338627	1.26455	up				miRNA
MI0005564	0.00654213	1.02702	0.0384615	1.02702	up	hsa-mir-873	100126316	ENSG00000215939	miRNA	miRBase:MI0005564
NEWGENE1481	0.0045606	1.18856	0.249218	1.18856	up				Unknown
NEWGENE1482	1.61567e-09	1.09303	0.128327	1.09303	up				Unknown
NEWGENE3494	1.31006e-14	-1.26675	-0.341136	1.26675	down				miRNA
NEWGENE1483	0.0383611	1.11744	0.1602	1.11744	up				Unknown
NEWGENE3496	0	1.09702	0.133589	1.09702	up				tRNA
NEWGENE1484	0.0344955	1.12576	0.1709	1.12576	up				Unknown
ENSG00000238300	5.82645e-13	1.36924	0.45338	1.36924	up	SNORD121B	101340252	ENSG00000238300	snoRNA	RFAM:RF01191
NEWGENE1485	1.13657e-10	1.25279	0.32515	1.25279	up				Unknown
NEWGENE3497	1.04794e-07	1.1802	0.239025	1.1802	up				snoRNA
NEWGENE1486	0	-1.16224	-0.21691	1.16224	down				Unknown
NEWGENE3498	1.10529e-10	1.11566	0.157899	1.11566	up				miRNA
ENSG00000200026	0	1.57119	0.651853	1.57119	up	U8		ENSG00000200026	snoRNA	RFAM:RF00096
NEWGENE1488	1.55531e-12	-1.12634	-0.171641	1.12634	down				Unknown
NEWGENE1490	7.21645e-14	1.35622	0.439593	1.35622	up				Unknown
NEWGENE1491	5.22515e-12	1.39246	0.477633	1.39246	up				Unknown
NEWGENE1492	2.44249e-15	1.21091	0.276093	1.21091	up				Unknown
ENSG00000239180	0	1.12831	0.174161	1.12831	up	Y_RNA		ENSG00000239180	scRNA	RFAM:RF00019
NEWGENE1493	4.09946e-05	1.01584	0.0226771	1.01584	up				Unknown
NEWGENE3499	0	-1.20413	-0.267991	1.20413	down				miRNA
NEWGENE1494	0	1.15148	0.203493	1.15148	up				Unknown
NEWGENE1495	0.000336536	-1.50376	-0.588574	1.50376	down				Unknown
NEWGENE1497	2.7532e-05	1.38206	0.466816	1.38206	up				Unknown
NEWGENE3500	0	1.15681	0.21015	1.15681	up				tRNA
chr9.trna6	3.41502e-05	1.28658	0.363536	1.28658	up	trna6			tRNA
NEWGENE1498	1.99264e-09	1.11231	0.153556	1.11231	up				Unknown
NEWGENE3501	0	-1.06543	-0.0914355	1.06543	down				snoRNA
NEWGENE1499	5.64137e-05	1.09203	0.127011	1.09203	up				Unknown
NEWGENE1500	1.18572e-13	1.31057	0.390191	1.31057	up				Unknown
NEWGENE3502	0	1.14447	0.194684	1.14447	up				miRNA
NEWGENE1501	0.00214363	1.03605	0.0510948	1.03605	up				Unknown
NEWGENE1502	0	-1.22776	-0.296025	1.22776	down				Unknown
NEWGENE1505	3.5445e-12	1.38907	0.474122	1.38907	up				Unknown
NEWGENE1507	0.00881062	1.03142	0.0446268	1.03142	up				Unknown
NEWGENE1508	0.00311357	1.16289	0.217718	1.16289	up				Unknown
NEWGENE1509	0.0429377	1.07868	0.109264	1.07868	up				Unknown
MI0000263	1.84519e-13	1.20734	0.271829	1.20734	up	hsa-mir-7-1	407043		miRNA	miRBase:MI0000263|RFAM:RF00053
ENSG00000202523	0.0108932	-1.04492	-0.0633985	1.04492	down	Y_RNA		ENSG00000202523	scRNA	RFAM:RF00019
NEWGENE1510	0	1.46628	0.552159	1.46628	up				Unknown
NEWGENE1511	0.0246259	-1.10546	-0.144646	1.10546	down				Unknown
ENSG00000222293	8.50622e-11	1.67668	0.745611	1.67668	up	RNU2-36P		ENSG00000222293	snRNA	RFAM:RF00004
NEWGENE1512	0.000210388	1.23741	0.307322	1.23741	up				Unknown
NEWGENE1513	2.78119e-05	-1.08742	-0.12091	1.08742	down				Unknown
NEWGENE1514	0.0291637	1.29295	0.370665	1.29295	up				Unknown
NEWGENE3504	0.0154317	1.05477	0.0769231	1.05477	up				miRNA
NEWGENE1516	0.0198854	1.07765	0.107889	1.07765	up				Unknown
NEWGENE3505	0	-1.23469	-0.304147	1.23469	down				miRNA
NEWGENE1517	1.70351e-06	1.32886	0.410188	1.32886	up				Unknown
NEWGENE1518	0.000139611	-1.17604	-0.233943	1.17604	down				Unknown
MI0000060	0	1.13049	0.176945	1.13049	up	hsa-let-7a-1	406881	ENSG00000199165	miRNA	miRBase:MI0000060|RFAM:RF00027
MI0000067	0	1.06856	0.0956617	1.06856	up	hsa-let-7f-1	406888	ENSG00000199072	miRNA	miRBase:MI0000067|RFAM:RF00027
MI0000065	1.48087e-10	-1.02055	-0.0293536	1.02055	down	hsa-let-7d	406886	ENSG00000199133	miRNA	miRBase:MI0000065|RFAM:RF00027
NEWGENE1521	4.38203e-05	-1.10091	-0.138693	1.10091	down				Unknown
MI0000439	1.14567e-05	-1.10124	-0.139132	1.10124	down	hsa-mir-23b	407011		miRNA	miRBase:MI0000439
MI0000440	0	-1.02205	-0.0314637	1.02205	down	hsa-mir-27b	407019		miRNA	miRBase:MI0000440
MI0000080	1.30364e-08	-1.16443	-0.219627	1.16443	down	hsa-mir-24-1	407012		miRNA	miRBase:MI0000080
ENSG00000238746	0.00805277	1.19841	0.261119	1.19841	up	snoU13		ENSG00000238746	snoRNA	RFAM:RF01210
NEWGENE1522	8.19983e-06	1.0868	0.120081	1.0868	up				Unknown
ENSG00000201938	0	-1.10072	-0.138442	1.10072	down	Y_RNA		ENSG00000201938	scRNA	RFAM:RF00019
NEWGENE1524	2.44471e-13	1.0674	0.0941006	1.0674	up				Unknown
NEWGENE3506	0.00585621	-1.18249	-0.241822	1.18249	down				miRNA
NEWGENE1527	0.009472	-1.10382	-0.142508	1.10382	down				Unknown
NEWGENE1530	0	1.78301	0.834317	1.78301	up				Unknown
NEWGENE1531	0.00664595	1.23717	0.307044	1.23717	up				Unknown
NEWGENE1536	3.64492e-06	1.10558	0.144805	1.10558	up				Unknown
NEWGENE1537	0.0300409	1.09518	0.131169	1.09518	up				Unknown
NEWGENE3508	2.02417e-05	1.77247	0.825759	1.77247	up				tRNA
MI0000090	0.00207022	1.15443	0.207178	1.15443	up	hsa-mir-32	407036		miRNA	miRBase:MI0000090
NEWGENE3509	0.00703013	1.26074	0.334273	1.26074	up				tRNA
MI0017298	0.0131311	-1	0	1	down	hsa-mir-4668	100616114		miRNA	miRBase:MI0017298
ENSG00000200261	0.0224393	-1.06593	-0.0921164	1.06593	down	Y_RNA		ENSG00000200261	scRNA	RFAM:RF00019
NEWGENE3510	0	1.99801	0.998561	1.99801	up				miRNA
ENSG00000201749	0.00631634	1.05732	0.0804143	1.05732	up	Y_RNA		ENSG00000201749	scRNA	RFAM:RF00019
NEWGENE1553	0.00369881	-1.05524	-0.0775746	1.05524	down				Unknown
NEWGENE1555	0.00100328	-1.00634	-0.00912415	1.00634	down				Unknown
NEWGENE1557	1.9318e-05	1.20745	0.271967	1.20745	up				Unknown
NEWGENE1562	0.0076432	1.21309	0.278686	1.21309	up				Unknown
ENSG00000212447	0.0010345	1.52833	0.611953	1.52833	up	SNORD90	692206	ENSG00000212447	snoRNA	RFAM:RF00579
NEWGENE1563	6.3249e-06	1.08383	0.116132	1.08383	up				Unknown
NEWGENE3512	2.35367e-14	1.01769	0.0253	1.01769	up				miRNA
NEWGENE1564	0.0277515	1.25432	0.326908	1.25432	up				Unknown
MI0000269	0	-1.05072	-0.0713748	1.05072	down	hsa-mir-181a-2	406954	ENSG00000207595	miRNA	miRBase:MI0000269|RFAM:RF00076
MI0000683	4.36631e-11	1.16241	0.217123	1.16241	up	hsa-mir-181b-2	406956	ENSG00000207737	miRNA	miRBase:MI0000683|RFAM:RF00076
ENSG00000199313	6.66134e-15	1.71648	0.779451	1.71648	up	RNU4-82P		ENSG00000199313	snRNA	RFAM:RF00015
NEWGENE1567	0.0282805	-1.03425	-0.0485886	1.03425	down				Unknown
ENSG00000201302	0.0473225	1.21963	0.286441	1.21963	up	SNORA65	26783	ENSG00000201302	snoRNA	RFAM:RF00302
MI0000282	0	-1.05491	-0.0771157	1.05491	down	hsa-mir-199b	406978	ENSG00000207581	miRNA	miRBase:MI0000282
chr9.trna4	0.00744983	1.132	0.178876	1.132	up	trna4			tRNA
NEWGENE3515	0.0212079	1.09316	0.128504	1.09316	up				miRNA
NEWGENE1575	0.00713196	1.49174	0.576998	1.49174	up				Unknown
ENSG00000235284	0.0161834	1.50452	0.589299	1.50452	up	SNORD62A	26786|692093	ENSG00000235284	snoRNA	RFAM:RF00153
ENSG00000231587	0.0171041	1.50395	0.588757	1.50395	up	SNORD62B	26786|692093	ENSG00000231587	snoRNA	RFAM:RF00153
NEWGENE1585	1.61667e-06	-1.04179	-0.0590674	1.04179	down				Unknown
NEWGENE3517	0	-1.1371	-0.185363	1.1371	down				miRNA
ENSG00000206611	0	1.70791	0.772232	1.70791	up	SNORD24	26820	ENSG00000206611	snoRNA	RFAM:RF00069
ENSG00000200831	2.96503e-09	1.64826	0.720947	1.64826	up	SNORD36B		ENSG00000200831	snoRNA	RFAM:RF00049
NEWGENE3518	2.50201e-09	1.26103	0.334605	1.26103	up				miRNA
NEWGENE3519	0	1.22436	0.292023	1.22436	up				miRNA
NEWGENE1600	0.000481651	1.22814	0.296477	1.22814	up				Unknown
NEWGENE1603	0	1.54016	0.623082	1.54016	up				Unknown
NEWGENE1606	4.56697e-05	1.08446	0.116983	1.08446	up				Unknown
NEWGENE3522	0.0254705	1.02685	0.0382313	1.02685	up				miRNA
MI0000471	0	-1.17396	-0.231387	1.17396	down	hsa-mir-126	406913		miRNA	miRBase:MI0000471
NEWGENE3523	0.00045419	1.27414	0.349522	1.27414	up				snoRNA
MI0016838	0.0131311	-1	0	1	down	hsa-mir-4479	100616480		miRNA	miRBase:MI0016838
NEWGENE1653	1.61431e-11	1.1294	0.175558	1.1294	up				Unknown
NEWGENE1654	0	-1.17653	-0.234532	1.17653	down				Unknown
NEWGENE1538	0	1.00806	0.0115828	1.00806	up				Unknown
NEWGENE3526	0.00854638	1.13279	0.17988	1.13279	up				miRNA
NEWGENE3527	3.97549e-12	1.18987	0.250809	1.18987	up				miRNA
NEWGENE1541	0.000128324	1.17783	0.236126	1.17783	up				Unknown
NEWGENE3529	3.62098e-05	1.36746	0.451498	1.36746	up				miRNA
NEWGENE1542	6.03772e-08	1.22378	0.291345	1.22378	up				Unknown
NEWGENE1543	1.76426e-05	1.12423	0.168932	1.12423	up				Unknown
NEWGENE3531	3.49857e-06	-1.09176	-0.126653	1.09176	down				miRNA
NEWGENE1547	0.000474373	1.33988	0.4221	1.33988	up				Unknown
NEWGENE1548	0.028149	1.1416	0.191062	1.1416	up				Unknown
NEWGENE3532	8.68777e-06	-1.10589	-0.145213	1.10589	down				miRNA
chr10.trna6	0	-1.00778	-0.0111855	1.00778	down	trna6			tRNA
NEWGENE1556	0	1.10064	0.138338	1.10064	up				Unknown
NEWGENE1561	9.02633e-07	-1.00374	-0.00538707	1.00374	down				Unknown
ENSG00000223156	0.0315717	1.00893	0.0128205	1.00893	up	RNU2-18P		ENSG00000223156	snRNA	RFAM:RF00004
ENSG00000251803	0.0364473	1.01793	0.025641	1.01793	up	Y_RNA		ENSG00000251803	scRNA	RFAM:RF00019
MI0003127_1chr10	0.0109696	1.02702	0.0384615	1.02702	up	hsa-mir-511	574445		miRNA	miRBase:MI0003127
MI0003127_2chr10	0.0109696	1.02702	0.0384615	1.02702	up	hsa-mir-511	574445		miRNA	miRBase:MI0003127
NEWGENE1569	0	-1.28311	-0.359647	1.28311	down				Unknown
NEWGENE1571	2.03006e-07	1.48061	0.566194	1.48061	up				Unknown
NEWGENE1572	0.00597361	1.11923	0.162513	1.11923	up				Unknown
ENSG00000199222	0.00822082	-1.02677	-0.0381132	1.02677	down	Y_RNA		ENSG00000199222	scRNA	RFAM:RF00019
NEWGENE3539	0.000330806	-1.08353	-0.115742	1.08353	down				miRNA
chr10.trna4	0	1.76311	0.818124	1.76311	up	trna4			tRNA
ENSG00000242213	0.00654213	1.00893	0.0128205	1.00893	up	AL391499.1		ENSG00000242213	snRNA_pseudogene
NEWGENE3541	0.0187666	-1.08673	-0.12	1.08673	down				miRNA
NEWGENE1584	4.03371e-06	1.21689	0.283196	1.21689	up				Unknown
ENSG00000199200	0	-1.14489	-0.195203	1.14489	down	Y_RNA		ENSG00000199200	scRNA	RFAM:RF00019
NEWGENE3543	2.39993e-08	-1.13746	-0.185812	1.13746	down				miRNA
MI0016001	0.00142936	1.03619	0.0512821	1.03619	up	hsa-mir-3611	100500890	ENSG00000266228	miRNA	miRBase:MI0016001
NEWGENE1587	4.0129e-09	1.07175	0.0999725	1.07175	up				Unknown
ENSG00000207271	0.00265265	1.23503	0.304542	1.23503	up	Y_RNA		ENSG00000207271	scRNA	RFAM:RF00019
NEWGENE1589	0.00837242	1.45466	0.540685	1.45466	up				Unknown
NEWGENE1591	3.96623e-05	1.29136	0.368897	1.29136	up				Unknown
NEWGENE1590	6.70934e-08	1.22351	0.291031	1.22351	up				Unknown
NEWGENE1595	0	-1.17915	-0.237741	1.17915	down				Unknown
NEWGENE1596	0.010288	1.0973	0.133957	1.0973	up				Unknown
NEWGENE3544	0.00234292	1.03466	0.0491564	1.03466	up				miRNA
NEWGENE3545	1.19413e-05	1.01337	0.0191628	1.01337	up				miRNA
NEWGENE1598	0.00161783	1.28892	0.366161	1.28892	up				Unknown
ENSG00000238707	1.11022e-16	-1.6412	-0.714751	1.6412	down	SNORD2		ENSG00000238707	snoRNA	RFAM:RF01299
NEWGENE3548	0.000950911	1.30933	0.388826	1.30933	up				miRNA
NEWGENE1607	0.00103743	-1.13948	-0.188373	1.13948	down				Unknown
NEWGENE3549	4.40822e-10	-1.04061	-0.0574287	1.04061	down				miRNA
NEWGENE1610	0.000458441	1.00264	0.00379996	1.00264	up				Unknown
NEWGENE1611	0.0165162	-1.03105	-0.0441133	1.03105	down				Unknown
NEWGENE1612	0	1.32195	0.402665	1.32195	up				Unknown
NEWGENE1613	0	1.51907	0.603186	1.51907	up				Unknown
NEWGENE1615	7.82296e-12	-1.15624	-0.209442	1.15624	down				Unknown
NEWGENE1616	2.70123e-10	1.49377	0.578953	1.49377	up				Unknown
MI0023611	0.0378765	-1	0	1	down	hsa-mir-7151			miRNA	miRBase:MI0023611
chr10.trna2	2.54339e-06	1.0636	0.0889594	1.0636	up	trna2			tRNA
NEWGENE1618	0.000627498	1.26577	0.340019	1.26577	up				Unknown
NEWGENE1619	0	1.39744	0.482784	1.39744	up				Unknown
ENSG00000221182	2.20626e-07	1.37775	0.46231	1.37775	up	SNORD98	692211	ENSG00000221182	snoRNA	RFAM:RF00607
NEWGENE1620	7.70196e-09	-1.22585	-0.293788	1.22585	down				Unknown
NEWGENE1621	0.0386612	-1.02289	-0.0326449	1.02289	down				Unknown
NEWGENE3555	0	1.42749	0.513481	1.42749	up				miRNA
NEWGENE1624	9.76996e-15	1.71628	0.779284	1.71628	up				Unknown
NEWGENE1626	3.76925e-11	1.31928	0.399751	1.31928	up				Unknown
NEWGENE3556	0.0372959	1.0596	0.0835242	1.0596	up				miRNA
NEWGENE3560	0.0260934	1.09826	0.135215	1.09826	up				tRNA
NEWGENE3569	0.0438637	1.04367	0.0616642	1.04367	up				tRNA
NEWGENE3570	0.00514975	1.26911	0.343819	1.26911	up				tRNA
NEWGENE3572	0.00915307	1.0352	0.0499164	1.0352	up				tRNA
ENSG00000241117	0.0363472	-1.08715	-0.120546	1.08715	down	AL359074.1		ENSG00000241117	tRNA_pseudogene
NEWGENE3574	0.0414603	-1.12185	-0.165886	1.12185	down				miRNA
NEWGENE1629	5.266e-06	1.25194	0.324161	1.25194	up				Unknown
NEWGENE1630	0.0389297	-1.03895	-0.0551236	1.03895	down				Unknown
NEWGENE1632	0	1.13927	0.188105	1.13927	up				Unknown
NEWGENE1637	0.00801807	1.11263	0.153974	1.11263	up				Unknown
NEWGENE1638	1.25011e-13	-1.20683	-0.27122	1.20683	down				Unknown
NEWGENE1639	0.00563699	1.06385	0.0892954	1.06385	up				Unknown
NEWGENE1641	0.000655019	-1.08623	-0.119335	1.08623	down				Unknown
NEWGENE3576	3.79567e-07	-1.10253	-0.140816	1.10253	down				miRNA
NEWGENE1644	0	-1.47473	-0.560449	1.47473	down				Unknown
NEWGENE1646	0.0136259	1.11104	0.151917	1.11104	up				Unknown
NEWGENE1647	0.00735561	-1.17603	-0.233921	1.17603	down				Unknown
ENSG00000201548	4.87444e-06	-1.12013	-0.163671	1.12013	down	Y_RNA		ENSG00000201548	scRNA	RFAM:RF00019
MI0000114	0	-1.03673	-0.0520379	1.03673	down	hsa-mir-107	406901		miRNA	miRBase:MI0000114
NEWGENE1650	0.000430744	1.36902	0.453142	1.36902	up				Unknown
ENSG00000201412	1.05257e-05	1.02364	0.0337032	1.02364	up	Y_RNA		ENSG00000201412	scRNA	RFAM:RF00019
NEWGENE1651	0.00765878	1.10336	0.141904	1.10336	up				Unknown
NEWGENE1652	0.00138626	1.1697	0.226135	1.1697	up				Unknown
ENSG00000206631	0.0185238	-1	0	1	down	RNU6-657P		ENSG00000206631	snRNA	RFAM:RF00026
NEWGENE1656	0.00773465	-1.20585	-0.270045	1.20585	down				Unknown
NEWGENE1657	0.000467054	1.15976	0.213826	1.15976	up				Unknown
NEWGENE1658	1.86073e-13	-1.14001	-0.189048	1.14001	down				Unknown
NEWGENE1661	0	-1.27996	-0.356094	1.27996	down				Unknown
ENSG00000200737	0.000568168	1.09271	0.127914	1.09271	up	Y_RNA		ENSG00000200737	scRNA	RFAM:RF00019
NEWGENE3579	3.88578e-14	-1.34703	-0.429777	1.34703	down				miRNA
MI0017317	0.00654213	1.02702	0.0384615	1.02702	up	hsa-mir-4685	100616482		miRNA	miRBase:MI0017317
NEWGENE3580	1.11022e-16	-1.27467	-0.350123	1.27467	down				miRNA
ENSG00000238588	0.00654213	1.01793	0.025641	1.01793	up	snoU13		ENSG00000238588	snoRNA	RFAM:RF01210
ENSG00000212325	0.00344569	-1.17179	-0.228711	1.17179	down	Y_RNA		ENSG00000212325	scRNA	RFAM:RF00019
ENSG00000222238	0.0039235	1.00893	0.0128205	1.00893	up	RNU2-43P		ENSG00000222238	snRNA	RFAM:RF00004
ENSG00000222414	0	1.49616	0.581262	1.49616	up	RNU2-59P		ENSG00000222414	snRNA	RFAM:RF00004
MI0014187	0.0223106	-1.04492	-0.0633985	1.04492	down	hsa-mir-3158-2	100423033		miRNA	miRBase:MI0014187
NEWGENE1663	8.88178e-16	1.57882	0.658843	1.57882	up				Unknown
MI0003129	0.000183333	-1.07071	-0.0985665	1.07071	down	hsa-mir-146b	574447	ENSG00000202569	miRNA	miRBase:MI0003129
NEWGENE1664	0.000337254	-1.00095	-0.00137608	1.00095	down				Unknown
NEWGENE1665	1.62929e-06	-1.07259	-0.101105	1.07259	down				Unknown
NEWGENE1667	0	-1.32563	-0.406683	1.32563	down				Unknown
NEWGENE1668	0	1.11412	0.155901	1.11412	up				Unknown
ENSG00000272160	0.0315717	-1	0	1	down	U4		ENSG00000272160	snRNA	RFAM:RF00015
NEWGENE1671	0.0063154	1.07752	0.107717	1.07752	up				Unknown
NEWGENE1674	0.000614019	1.05453	0.0765938	1.05453	up				Unknown
NEWGENE1675	1.68059e-10	-1.07678	-0.10672	1.07678	down				Unknown
NEWGENE3583	0.000645427	1.11262	0.153965	1.11262	up				miRNA
NEWGENE1677	0	1.39113	0.476253	1.39113	up				Unknown
NEWGENE1679	5.36783e-07	1.21336	0.279005	1.21336	up				Unknown
NEWGENE1680	1.5316e-05	1.27518	0.350706	1.27518	up				Unknown
NEWGENE1681	0.0352798	1.03814	0.054002	1.03814	up				Unknown
NEWGENE3584	7.60366e-08	1.15673	0.210054	1.15673	up				miRNA
ENSG00000207468	0	2.10192	1.07171	2.10192	up	SNORA19	641451	ENSG00000207468	snoRNA	RFAM:RF00413
NEWGENE1682	6.28279e-05	-1.1511	-0.203008	1.1511	down				Unknown
ENSG00000201884	0.00236371	1.01418	0.02032	1.01418	up	Y_RNA		ENSG00000201884	scRNA	RFAM:RF00019
NEWGENE3585	0	-1.14663	-0.197403	1.14663	down				miRNA
NEWGENE1687	1.39262e-06	-1.33489	-0.416716	1.33489	down				Unknown
NEWGENE3587	0.0257632	1.06439	0.0900303	1.06439	up				miRNA
NEWGENE1690	5.25533e-10	-1.07029	-0.0979974	1.07029	down				Unknown
NEWGENE1691	3.39307e-05	1.13897	0.187731	1.13897	up				Unknown
NEWGENE1692	3.93672e-05	-1.06848	-0.095564	1.06848	down				Unknown
NEWGENE1693	5.27978e-12	1.07562	0.105174	1.07562	up				Unknown
ENSG00000202487	5.43069e-06	1.24547	0.316694	1.24547	up	Y_RNA		ENSG00000202487	scRNA	RFAM:RF00019
ENSG00000222997	0.0364473	1.05296	0.0744533	1.05296	up	Y_RNA		ENSG00000222997	scRNA	RFAM:RF00019
NEWGENE1694	0	-1.17376	-0.231132	1.17376	down				Unknown
NEWGENE1695	3.03001e-06	-1.11256	-0.153888	1.11256	down				Unknown
NEWGENE3589	0	-1.24603	-0.317336	1.24603	down				miRNA
NEWGENE1698	0	-1.13953	-0.188435	1.13953	down				Unknown
NEWGENE1699	8.45138e-05	-1.11717	-0.159848	1.11717	down				Unknown
NEWGENE3590	3.49081e-11	2.08527	1.06023	2.08527	up				miRNA
NEWGENE1702	2.31881e-12	-1.00134	-0.00192985	1.00134	down				Unknown
NEWGENE3591	1.31566e-06	1.09675	0.133235	1.09675	up				miRNA
NEWGENE3592	2.72375e-05	1.23098	0.299811	1.23098	up				miRNA
NEWGENE3594	0.00219114	1.11272	0.154091	1.11272	up				snoRNA
ENSG00000199550	0.000558474	1.14149	0.19092	1.14149	up	Y_RNA		ENSG00000199550	scRNA	RFAM:RF00019
ENSG00000207008	0.0120895	1.39852	0.483905	1.39852	up	SNORA54	677833	ENSG00000207008	snoRNA	RFAM:RF00430
NEWGENE1705	2.58787e-05	-1.08288	-0.114877	1.08288	down				Unknown
ENSG00000201279	0	1.19376	0.255511	1.19376	up	Y_RNA		ENSG00000201279	scRNA	RFAM:RF00019
ENSG00000200201	0	-1.29514	-0.373106	1.29514	down	Y_RNA		ENSG00000200201	scRNA	RFAM:RF00019
ENSG00000200983	2.22045e-16	1.64134	0.714871	1.64134	up	SNORA3	619562	ENSG00000200983	snoRNA	RFAM:RF00334
ENSG00000212607	0	1.76079	0.816224	1.76079	up	SNORA45	677826	ENSG00000212607	snoRNA	RFAM:RF00334
NEWGENE1708	0.0378061	1.13673	0.184883	1.13673	up				Unknown
MI0016846	2.03006e-07	1.56168	0.643097	1.56168	up	hsa-mir-4485	100616263		miRNA	miRBase:MI0016846
uc001mir.1	0	-1.26595	-0.340223	1.26595	down	piR-32376			piRNA	DQ582265
NEWGENE1709	0.0114545	-1.06735	-0.0940392	1.06735	down				Unknown
uc021qdr.1	0.00772535	1.39181	0.476958	1.39181	up	piR-31637			piRNA	JB137816
NEWGENE1710	0	-1.14979	-0.201369	1.14979	down				Unknown
ENSG00000238622	0.0215477	1.68389	0.751799	1.68389	up	SNORD97	692223	ENSG00000238622	snoRNA	RFAM:RF01291
NEWGENE1712	0.00173894	-1.03619	-0.0512916	1.03619	down				Unknown
NEWGENE1713	0.00175441	1.2913	0.368828	1.2913	up				Unknown
NEWGENE1715	1.38558e-07	1.26651	0.340861	1.26651	up				Unknown
NEWGENE1716	0.0164824	1.18991	0.250852	1.18991	up				Unknown
NEWGENE1717	0	1.14586	0.19643	1.14586	up				Unknown
ENSG00000201403	1.02329e-05	1.2777	0.353547	1.2777	up	SNORD14B		ENSG00000201403	snoRNA	RFAM:RF00016
NEWGENE3597	0.0312753	1.10153	0.139503	1.10153	up				miRNA
NEWGENE1720	0	1.0563	0.0790206	1.0563	up				Unknown
ENSG00000207407	0.0315717	1.00893	0.0128205	1.00893	up	SNORA1		ENSG00000207407	snoRNA	RFAM:RF00408
NEWGENE1722	0.00247156	1.16674	0.222486	1.16674	up				Unknown
NEWGENE1723	0.0217257	1.07311	0.101792	1.07311	up				Unknown
NEWGENE1724	0.0309581	1.1735	0.230817	1.1735	up				Unknown
NEWGENE1727	8.65719e-09	1.15358	0.206113	1.15358	up				Unknown
NEWGENE1728	0.0142265	1.13155	0.178304	1.13155	up				Unknown
NEWGENE1729	0.0460367	1.06321	0.0884202	1.06321	up				Unknown
NEWGENE1730	4.88971e-06	1.25757	0.330637	1.25757	up				Unknown
NEWGENE1731	0.001793	-1.19638	-0.258678	1.19638	down				Unknown
NEWGENE1732	0.0334216	-1.23395	-0.303281	1.23395	down				Unknown
NEWGENE3600	0.0140579	1.05579	0.0783182	1.05579	up				miRNA
ENSG00000200615	0	1.00145	0.00209141	1.00145	up	Y_RNA		ENSG00000200615	scRNA	RFAM:RF00019
ENSG00000200485	0.00613695	1.22637	0.294389	1.22637	up	Y_RNA		ENSG00000200485	scRNA	RFAM:RF00019
ENSG00000201867	0.00900135	1.18463	0.244434	1.18463	up	Y_RNA		ENSG00000201867	scRNA	RFAM:RF00019
NEWGENE1737	8.24589e-11	1.31344	0.393349	1.31344	up				Unknown
NEWGENE1738	0.00329885	-1.08693	-0.120256	1.08693	down				Unknown
NEWGENE1739	0.00910083	1.00325	0.00468576	1.00325	up				Unknown
NEWGENE1740	0.000116168	1.24334	0.314219	1.24334	up				Unknown
NEWGENE1741	0.000379198	1.23179	0.300761	1.23179	up				Unknown
NEWGENE1742	1.3877e-09	-1.13085	-0.177403	1.13085	down				Unknown
NEWGENE1743	0.0407366	-1.32692	-0.408076	1.32692	down				Unknown
NEWGENE1744	2.62856e-11	1.02885	0.041036	1.02885	up				Unknown
NEWGENE3604	0	-1.15115	-0.20307	1.15115	down				miRNA
NEWGENE1746	0.01808	1.12213	0.166235	1.12213	up				Unknown
NEWGENE1747	0.00440784	-1.08066	-0.111917	1.08066	down				Unknown
NEWGENE1748	0.00171439	1.26646	0.340796	1.26646	up				Unknown
NEWGENE1749	6.36912e-07	-1.48888	-0.574228	1.48888	down				Unknown
NEWGENE1750	2.6242e-09	1.25471	0.327352	1.25471	up				Unknown
[truncated: 1,414 more rows]
