# Supplementary material for: MicroRNA expression changes in association with changes in interleukin-1ß/interleukin10 ratios produced by monocytes in autism spectrum disorders: their association with neuropsychiatric symptoms and comorbid conditions (observational study)
Source: J Neuroinflammation. 2017 Nov 25;14:229. doi: 10.1186/s12974-017-1003-6 (PMC5702092; doi:10.1186/s12974-017-1003-6)
Supplement: Supplementary file 6 — Results of miRNA target gene analysis of group C. (XLSX 105 kb) [file 12974_2017_1003_MOESM6_ESM.xlsx]

## Sheet: mirDIP_E_2017_10_27_14_22_35
Group C analysis
ASD cells with high IL-1ß/IL-10 ratios vs. non-ASD control cells.
Gene Symbol -
Micro RNA - hsa-mir-181a-1
hsa-mir-181a-2
hsa-mir-1248
hsa-mir-93
hsa-mir-181b-2
hsa-mir-223
hsa-mir-342
Minimum Score - High
Results (1410)	Uniprot	Pseudogene	MicroRNA	Integrated Score	Number of Sources	Score Class	Sources
Gene Symbol	Q13009		hsa-miR-1248	0.563249	14	Very High	CoMeTa|Cupid|DIANA|ElMMo3|MBStar|MirAncesTar|miRDB|MirMAP|MirTar|Mirza-G|PACCMIT|RepTar|RNAhybrid|TargetSpy
TIAM1	Q8IVL0		hsa-miR-1248	0.559489	16	Very High	BiTargeting|CoMeTa|Cupid|DIANA|ElMMo3|MBStar|MirAncesTar|miRDB|MirMAP|MirSNP|MirTar|Mirza-G|PACCMIT|RepTar|RNAhybrid|TargetSpy
NAV3	Q9Y6M4		hsa-miR-1248	0.554742	14	Very High	CoMeTa|Cupid|DIANA|ElMMo3|MBStar|MirAncesTar|miRDB|MirMAP|MirSNP|MirTar|Mirza-G|PACCMIT|RNAhybrid|TargetSpy
CSNK1G3	Q99755		hsa-miR-1248	0.518905	15	Very High	BiTargeting|CoMeTa|Cupid|DIANA|ElMMo3|MBStar|MirAncesTar|miRDB|MirMAP|MirTar|Mirza-G|PACCMIT|RepTar|RNA22|RNAhybrid
PIP5K1A	P51790		hsa-miR-1248	0.508156	13	Very High	CoMeTa|Cupid|DIANA|ElMMo3|MBStar|MirAncesTar|miRDB|MirMAP|MirTar|Mirza-G|PACCMIT|RNAhybrid|TargetSpy
CLCN3	P28370		hsa-miR-1248	0.500465	12	Very High	CoMeTa|Cupid|DIANA|ElMMo3|MirAncesTar|miRDB|MirMAP|MirTar|Mirza-G|PACCMIT|RNAhybrid|TargetSpy
SMARCA1	Q04727		hsa-miR-1248	0.494126	14	Very High	CoMeTa|Cupid|DIANA|ElMMo3|MBStar|MirAncesTar|miRDB|MirMAP|MirTar|Mirza-G|PACCMIT|RepTar|RNAhybrid|TargetSpy
TLE4	P51513		hsa-miR-1248	0.490829	13	Very High	BiTargeting|CoMeTa|Cupid|DIANA|ElMMo3|MBStar|MirAncesTar|miRDB|MirMAP|MirTar|Mirza-G|PACCMIT|RNAhybrid
NOVA1	Q86X52		hsa-miR-1248	0.488157	12	Very High	CoMeTa|DIANA|ElMMo3|MirAncesTar|miRDB|MirMAP|MirSNP|MirTar|Mirza-G|PACCMIT|RepTar|TargetSpy
CHSY1	Q9NYF8		hsa-miR-1248	0.479452	13	Very High	CoMeTa|Cupid|DIANA|ElMMo3|MBStar|MirAncesTar|miRDB|MirMAP|MirTar|Mirza-G|RepTar|RNAhybrid|TargetSpy
BCLAF1	Q96QB1		hsa-miR-1248	0.477774	14	Very High	CoMeTa|Cupid|DIANA|ElMMo3|MBStar|MirAncesTar|miRDB|MirMAP|MirSNP|MirTar|Mirza-G|PACCMIT|RepTar|RNAhybrid
DLC1	P11532		hsa-miR-1248	0.461294	13	Very High	CoMeTa|DIANA|ElMMo3|MBStar|MirAncesTar|miRDB|MirMAP|MirSNP|MirTar|Mirza-G|PACCMIT|RNAhybrid|TargetSpy
DMD	O75822		hsa-miR-1248	0.460634	13	Very High	CoMeTa|Cupid|DIANA|ElMMo3|MirAncesTar|miRDB|MirMAP|MirTar|Mirza-G|PACCMIT|RepTar|RNAhybrid|TargetSpy
EIF3J	Q13126		hsa-miR-1248	0.454177	13	Very High	BiTargeting|CoMeTa|DIANA|ElMMo3|MBStar|MirAncesTar|miRDB|MirMAP|MirSNP|MirTar|Mirza-G|RNAhybrid|TargetSpy
MTAP	P48380		hsa-miR-1248	0.453088	12	Very High	BiTargeting|CoMeTa|Cupid|DIANA|ElMMo3|MirAncesTar|miRDB|MirMAP|Mirza-G|PACCMIT|RepTar|RNAhybrid
RFX3	Q15700		hsa-miR-1248	0.451764	14	Very High	CoMeTa|Cupid|DIANA|ElMMo3|MBStar|MirAncesTar|miRDB|MirMAP|MirTar|Mirza-G|PACCMIT|RepTar|RNAhybrid|TargetSpy
DLG2	Q9H0F5		hsa-miR-1248	0.449089	13	Very High	CoMeTa|Cupid|DIANA|ElMMo3|MBStar|MirAncesTar|miRDB|MirMAP|MirTar|Mirza-G|RepTar|RNAhybrid|TargetSpy
RNF38	Q16665		hsa-miR-1248	0.445861	12	Very High	CoMeTa|Cupid|DIANA|ElMMo3|MBStar|MirAncesTar|miRDB|MirMAP|MirSNP|Mirza-G|RNAhybrid|TargetSpy
HIF1A	Q13492		hsa-miR-1248	0.444524	12	Very High	CoMeTa|Cupid|DIANA|ElMMo3|MBStar|MirAncesTar|miRDB|MirMAP|Mirza-G|PACCMIT|RepTar|RNAhybrid
PICALM	Q96PD7		hsa-miR-1248	0.442274	12	Very High	Cupid|DIANA|ElMMo3|MirAncesTar|miRDB|MirMAP|MirTar|Mirza-G|PACCMIT|RepTar|RNAhybrid|TargetSpy
DGAT2	Q15022		hsa-miR-1248	0.441738	11	Very High	CoMeTa|Cupid|DIANA|ElMMo3|MirAncesTar|MirMAP|Mirza-G|PACCMIT|RepTar|RNAhybrid|TargetSpy
SUZ12	P58417		hsa-miR-1248	0.441639	13	Very High	BiTargeting|DIANA|ElMMo3|MBStar|MirAncesTar|miRDB|MirMAP|MirSNP|MirTar|Mirza-G|PACCMIT|RNAhybrid|TargetSpy
NXPH1	Q8TDY2		hsa-miR-1248	0.440788	13	Very High	CoMeTa|Cupid|DIANA|ElMMo3|MBStar|MirAncesTar|miRDB|MirMAP|MirTar|Mirza-G|RepTar|RNAhybrid|TargetSpy
RB1CC1	Q9Y4J8		hsa-miR-1248	0.439002	15	Very High	BiTargeting|CoMeTa|DIANA|ElMMo3|MBStar|MirAncesTar|miRDB|MirMAP|MirSNP|MirTar|Mirza-G|PACCMIT|RepTar|RNAhybrid|TargetSpy
DTNA	Q13950		hsa-miR-1248	0.437471	14	Very High	CoMeTa|Cupid|DIANA|ElMMo3|MBStar|MirAncesTar|miRDB|MirMAP|MirSNP|MirTar|Mirza-G|RepTar|RNAhybrid|TargetSpy
RUNX2	Q14195		hsa-miR-1248	0.437195	13	Very High	CoMeTa|DIANA|ElMMo3|MBStar|MirAncesTar|miRDB|MirMAP|MirTar|Mirza-G|PACCMIT|RepTar|RNAhybrid|TargetSpy
DPYSL3	O60684		hsa-miR-1248	0.435782	12	Very High	CoMeTa|DIANA|ElMMo3|MBStar|MirAncesTar|miRDB|MirMAP|MirTar|Mirza-G|PACCMIT|RepTar|RNA22
KPNA6	Q9UGU0		hsa-miR-1248	0.43455	11	Very High	CoMeTa|Cupid|DIANA|ElMMo3|MirAncesTar|miRDB|MirMAP|Mirza-G|PACCMIT|RNAhybrid|TargetSpy
TCF20	Q8TF17		hsa-miR-1248	0.432807	14	Very High	BiTargeting|CoMeTa|DIANA|ElMMo3|MBStar|MirAncesTar|miRDB|MirMAP|MirSNP|MirTar|PACCMIT|RepTar|RNAhybrid|TargetSpy
SH3TC2	P30279		hsa-miR-1248	0.432639	13	Very High	CoMeTa|DIANA|ElMMo3|MBStar|MirAncesTar|miRDB|MirMAP|MirSNP|MirTar|Mirza-G|RepTar|RNAhybrid|TargetSpy
CCND2	P06753		hsa-miR-1248	0.430755	14	Very High	CoMeTa|ElMMo3|MBStar|MirAncesTar|miRDB|MirMAP|MirSNP|MirTar|Mirza-G|PACCMIT|RepTar|RNA22|RNAhybrid|TargetSpy
TPM3	P29558		hsa-miR-1248	0.429082	13	Very High	BiTargeting|Cupid|DIANA|ElMMo3|MBStar|MirAncesTar|miRDB|MirMAP|MirSNP|MirTar|Mirza-G|PACCMIT|RNAhybrid
RBMS1	P45985		hsa-miR-1248	0.427016	13	Very High	CoMeTa|Cupid|DIANA|ElMMo3|MBStar|MirAncesTar|miRDB|MirMAP|MirTar|Mirza-G|RepTar|RNAhybrid|TargetSpy
MAP2K4	Q14C86		hsa-miR-1248	0.425223	12	Very High	CoMeTa|DIANA|ElMMo3|MBStar|MirAncesTar|miRDB|MirMAP|MirSNP|MirTar|Mirza-G|PACCMIT|RNAhybrid
GAPVD1	Q9UHV7		hsa-miR-1248	0.42415	11	Very High	BiTargeting|CoMeTa|Cupid|DIANA|ElMMo3|MirAncesTar|miRDB|MirMAP|PACCMIT|RNAhybrid|TargetSpy
MED13	Q9HCK5		hsa-miR-1248	0.424137	14	Very High	CoMeTa|Cupid|DIANA|ElMMo3|MBStar|MirAncesTar|miRDB|MirMAP|MirTar|Mirza-G|PACCMIT|RepTar|RNA22|TargetSpy
AGO4	A2A3K4		hsa-miR-1248	0.423793	13	Very High	BiTargeting|DIANA|ElMMo3|MBStar|MirAncesTar|miRDB|MirMAP|MirSNP|MirTar|Mirza-G|PACCMIT|RepTar|RNAhybrid
PTPDC1	Q8WUM4		hsa-miR-1248	0.423718	13	Very High	CoMeTa|Cupid|DIANA|ElMMo3|MBStar|MirAncesTar|miRDB|MirMAP|MirTar|Mirza-G|RepTar|RNAhybrid|TargetSpy
PDCD6IP	Q86UP2		hsa-miR-1248	0.423646	12	Very High	CoMeTa|Cupid|DIANA|ElMMo3|MBStar|MirAncesTar|miRDB|MirMAP|MirSNP|MirTar|Mirza-G|RNAhybrid
KTN1	Q96PU8		hsa-miR-1248	0.423236	12	Very High	CoMeTa|Cupid|DIANA|ElMMo3|MBStar|MirAncesTar|miRDB|MirMAP|Mirza-G|RepTar|RNAhybrid|TargetSpy
QKI	O75494		hsa-miR-1248	0.42122	13	Very High	BiTargeting|CoMeTa|Cupid|DIANA|ElMMo3|MBStar|MirAncesTar|MirMAP|Mirza-G|PACCMIT|RNA22|RNAhybrid|TargetSpy
SRSF10	Q9Y3C5		hsa-miR-1248	0.419579	12	Very High	CoMeTa|Cupid|DIANA|ElMMo3|MirAncesTar|miRDB|MirMAP|MirSNP|MirTar|Mirza-G|RepTar|TargetSpy
RNF11	Q969H0		hsa-miR-1248	0.418983	12	Very High	CoMeTa|Cupid|DIANA|ElMMo3|MBStar|MirAncesTar|miRDB|MirMAP|MirTar|Mirza-G|PACCMIT|RNAhybrid
FBXW7	Q92536		hsa-miR-1248	0.417614	15	Very High	BiTargeting|CoMeTa|DIANA|ElMMo3|MBStar|MirAncesTar|miRDB|MirMAP|MirSNP|MirTar|Mirza-G|PACCMIT|RepTar|RNAhybrid|TargetSpy
SLC7A6	Q12926		hsa-miR-1248	0.417377	12	Very High	CoMeTa|Cupid|DIANA|ElMMo3|MBStar|MirAncesTar|miRDB|MirMAP|Mirza-G|PACCMIT|RNAhybrid|TargetSpy
ELAVL2	Q8TAS1		hsa-miR-1248	0.415323	10	Very High	BiTargeting|DIANA|ElMMo3|MBStar|MirAncesTar|miRDB|MirMAP|MirTar|Mirza-G|TargetSpy
UHMK1	O60229		hsa-miR-1248	0.412547	13	Very High	CoMeTa|Cupid|DIANA|ElMMo3|MBStar|MirAncesTar|miRDB|MirMAP|MirTar|Mirza-G|RepTar|RNAhybrid|TargetSpy
KALRN	Q9Y2I2		hsa-miR-1248	0.41094	13	Very High	CoMeTa|Cupid|DIANA|ElMMo3|MirAncesTar|miRDB|MirMAP|MirSNP|Mirza-G|RepTar|RNA22|RNAhybrid|TargetSpy
NTNG1	O75592		hsa-miR-1248	0.410273	12	Very High	CoMeTa|Cupid|DIANA|ElMMo3|MBStar|MirAncesTar|miRDB|MirMAP|MirTar|Mirza-G|RepTar|RNAhybrid
MYCBP2	Q6T4R5		hsa-miR-1248	0.409304	11	Very High	Cupid|DIANA|ElMMo3|MBStar|MirAncesTar|miRDB|MirMAP|MirTar|Mirza-G|RepTar|TargetSpy
NHS	Q16612		hsa-miR-1248	0.407537	10	Very High	CoMeTa|Cupid|ElMMo3|MBStar|MirAncesTar|miRDB|MirMAP|Mirza-G|PACCMIT|RNAhybrid
NREP	Q13443		hsa-miR-1248	0.407057	11	Very High	CoMeTa|ElMMo3|MirAncesTar|miRDB|MirMAP|MirTar|Mirza-G|PACCMIT|RepTar|RNAhybrid|TargetSpy
ADAM9	P43034		hsa-miR-1248	0.40684	11	Very High	CoMeTa|Cupid|DIANA|ElMMo3|MBStar|MirAncesTar|miRDB|MirMAP|RepTar|RNAhybrid|TargetSpy
PAFAH1B1	Q86VW0		hsa-miR-1248	0.406456	12	Very High	Cupid|DIANA|ElMMo3|MBStar|MirAncesTar|miRDB|MirMAP|MirTar|Mirza-G|RepTar|RNAhybrid|TargetSpy
SESTD1	Q9C0D3		hsa-miR-1248	0.405493	13	Very High	Cupid|DIANA|ElMMo3|MBStar|MirAncesTar|miRDB|MirMAP|MirTar|Mirza-G|RepTar|RNA22|RNAhybrid|TargetSpy
ZYG11B	Q6KC79		hsa-miR-1248	0.400405	11	Very High	CoMeTa|Cupid|DIANA|ElMMo3|MirAncesTar|miRDB|MirMAP|MirSNP|Mirza-G|RepTar|RNAhybrid
NIPBL	O60907		hsa-miR-1248	0.399847	13	Very High	BiTargeting|CoMeTa|DIANA|ElMMo3|MBStar|MirAncesTar|miRDB|MirMAP|MirSNP|Mirza-G|PACCMIT|RepTar|TargetSpy
TBL1X	P35226		hsa-miR-1248	0.399247	12	Very High	CoMeTa|Cupid|DIANA|ElMMo3|MBStar|MirAncesTar|miRDB|MirMAP|Mirza-G|RepTar|RNAhybrid|TargetSpy
BMI1	Q04900		hsa-miR-1248	0.399107	13	Very High	CoMeTa|DIANA|ElMMo3|MBStar|MirAncesTar|miRDB|MirMAP|MirSNP|MirTar|Mirza-G|PACCMIT|RepTar|RNAhybrid
CD164	Q2KHR2		hsa-miR-1248	0.398721	12	Very High	CoMeTa|DIANA|ElMMo3|MBStar|MirAncesTar|miRDB|MirMAP|MirTar|Mirza-G|PACCMIT|RNAhybrid|TargetSpy
RFX7	O43741		hsa-miR-1248	0.398139	13	Very High	CoMeTa|DIANA|ElMMo3|MBStar|MirAncesTar|miRDB|MirMAP|MirSNP|MirTar|Mirza-G|RepTar|RNA22|TargetSpy
PRKAB2	O15164		hsa-miR-1248	0.398031	12	Very High	CoMeTa|DIANA|ElMMo3|MBStar|MirAncesTar|miRDB|MirMAP|MirSNP|MirTar|Mirza-G|RepTar|RNAhybrid
TRIM24	O15165		hsa-miR-1248	0.397458	14	Very High	BiTargeting|CoMeTa|DIANA|ElMMo3|MBStar|MirAncesTar|miRDB|MirMAP|MirSNP|MirTar|Mirza-G|RepTar|RNAhybrid|TargetSpy
LDLRAD4	O15315		hsa-miR-1248	0.395023	12	Very High	CoMeTa|Cupid|DIANA|ElMMo3|MBStar|MirAncesTar|MirMAP|MirSNP|MirTar|Mirza-G|RepTar|RNAhybrid
RAD51B	Q86YH6		hsa-miR-1248	0.394439	13	Very High	CoMeTa|Cupid|DIANA|ElMMo3|MirAncesTar|miRDB|MirMAP|MirSNP|Mirza-G|PACCMIT|RepTar|RNAhybrid|TargetSpy
PDSS2	Q9UQ26		hsa-miR-1248	0.394144	12	Very High	BiTargeting|CoMeTa|DIANA|ElMMo3|MBStar|MirAncesTar|miRDB|MirMAP|MirSNP|Mirza-G|RepTar|RNAhybrid
RIMS2	Q8NBA8		hsa-miR-1248	0.393508	13	Very High	Cupid|DIANA|ElMMo3|MBStar|MirAncesTar|miRDB|MirMAP|MirSNP|MirTar|Mirza-G|RepTar|RNAhybrid|TargetSpy
DTWD2	Q01151		hsa-miR-1248	0.39243	12	Very High	CoMeTa|DIANA|ElMMo3|MBStar|MirAncesTar|miRDB|MirMAP|MirTar|Mirza-G|RepTar|RNAhybrid|TargetSpy
CD83	P10826		hsa-miR-1248	0.391945	11	Very High	CoMeTa|Cupid|DIANA|ElMMo3|MirAncesTar|miRDB|MirMAP|MirTar|Mirza-G|RNAhybrid|TargetSpy
RARB	Q99612		hsa-miR-1248	0.390267	11	Very High	Cupid|DIANA|ElMMo3|MBStar|MirAncesTar|miRDB|MirMAP|MirSNP|MirTar|Mirza-G|RNAhybrid
KLF6	P23760		hsa-miR-1248	0.389294	12	Very High	CoMeTa|Cupid|DIANA|ElMMo3|MBStar|MirAncesTar|miRDB|MirMAP|MirSNP|Mirza-G|RNAhybrid|TargetSpy
PAX3	Q9UQ16		hsa-miR-1248	0.387706	13	Very High	BiTargeting|CoMeTa|DIANA|ElMMo3|MBStar|MirAncesTar|miRDB|MirMAP|MirTar|Mirza-G|RepTar|RNAhybrid|TargetSpy
DNM3	Q15233		hsa-miR-1248	0.387095	11	Very High	CoMeTa|DIANA|ElMMo3|MBStar|MirAncesTar|miRDB|MirMAP|MirTar|PACCMIT|RNAhybrid|TargetSpy
NONO	Q92843		hsa-miR-1248	0.385911	12	Very High	CoMeTa|Cupid|DIANA|ElMMo3|MBStar|MirAncesTar|miRDB|MirMAP|Mirza-G|PACCMIT|RepTar|RNAhybrid
BCL2L2	Q99075		hsa-miR-1248	0.385804	12	Very High	CoMeTa|DIANA|ElMMo3|MirAncesTar|miRDB|MirMAP|MirSNP|MirTar|Mirza-G|RepTar|RNAhybrid|TargetSpy
HBEGF	Q6P1J9		hsa-miR-1248	0.384974	12	Very High	BiTargeting|CoMeTa|DIANA|ElMMo3|MBStar|MirAncesTar|miRDB|MirMAP|MirTar|Mirza-G|PACCMIT|RNA22
CDC73	Q7Z3G6		hsa-miR-1248	0.384857	11	Very High	DIANA|ElMMo3|MBStar|MirAncesTar|miRDB|MirMAP|MirTar|Mirza-G|RepTar|RNAhybrid|TargetSpy
PRICKLE2	Q13042		hsa-miR-1248	0.383145	12	Very High	CoMeTa|DIANA|ElMMo3|MBStar|MirAncesTar|miRDB|MirMAP|MirTar|PACCMIT|RepTar|RNAhybrid|TargetSpy
CDC16	Q05BQ5		hsa-miR-1248	0.382849	12	Very High	Cupid|DIANA|ElMMo3|MBStar|MirAncesTar|miRDB|MirMAP|MirTar|Mirza-G|PACCMIT|RNAhybrid|TargetSpy
MBTD1	Q04771		hsa-miR-1248	0.38224	10	High	CoMeTa|Cupid|ElMMo3|MBStar|MirAncesTar|miRDB|PACCMIT|RepTar|RNAhybrid|TargetSpy
ACVR1	P24941		hsa-miR-1248	0.381909	10	High	CoMeTa|Cupid|ElMMo3|MirAncesTar|miRDB|MirMAP|MirTar|Mirza-G|RNAhybrid|TargetSpy
CDK2	A0AVT1		hsa-miR-1248	0.380497	12	High	CoMeTa|DIANA|ElMMo3|MBStar|MirAncesTar|miRDB|MirMAP|MirSNP|MirTar|Mirza-G|RepTar|RNAhybrid
UBA6	O14639		hsa-miR-1248	0.379236	14	High	BiTargeting|CoMeTa|DIANA|ElMMo3|MBStar|MirAncesTar|miRDB|MirMAP|MirSNP|MirTar|Mirza-G|RepTar|RNAhybrid|TargetSpy
ABLIM1	Q8N8S7		hsa-miR-1248	0.379016	13	High	CoMeTa|DIANA|ElMMo3|MBStar|MirAncesTar|miRDB|MirMAP|MirTar|Mirza-G|RepTar|RNA22|RNAhybrid|TargetSpy
ENAH	P47755		hsa-miR-1248	0.378082	12	High	CoMeTa|Cupid|DIANA|ElMMo3|MBStar|MirAncesTar|miRDB|MirMAP|MirTar|Mirza-G|RNAhybrid|TargetSpy
CAPZA2	O75626		hsa-miR-1248	0.376808	11	High	BiTargeting|CoMeTa|Cupid|DIANA|ElMMo3|MBStar|MirAncesTar|miRDB|MirMAP|MirTar|Mirza-G
PRDM1	Q01082		hsa-miR-1248	0.376558	11	High	BiTargeting|CoMeTa|Cupid|ElMMo3|MBStar|MirAncesTar|miRDB|MirMAP|Mirza-G|RNAhybrid|TargetSpy
SPTBN1	Q9NZC4		hsa-miR-1248	0.376499	12	High	CoMeTa|DIANA|ElMMo3|MBStar|MirAncesTar|miRDB|MirMAP|MirSNP|MirTar|Mirza-G|RepTar|RNAhybrid
EHF	Q86Z02		hsa-miR-1248	0.375951	12	High	BiTargeting|CoMeTa|Cupid|DIANA|ElMMo3|MBStar|MirAncesTar|MirMAP|Mirza-G|RepTar|RNA22|RNAhybrid
HIPK1	P32780		hsa-miR-1248	0.375777	12	High	CoMeTa|Cupid|DIANA|ElMMo3|MBStar|MirAncesTar|miRDB|MirMAP|MirTar|Mirza-G|RNAhybrid|TargetSpy
GTF2H1	P82970		hsa-miR-1248	0.374427	11	High	CoMeTa|DIANA|ElMMo3|MirAncesTar|miRDB|MirMAP|MirTar|Mirza-G|PACCMIT|RepTar|RNAhybrid
HMGN5	P52564		hsa-miR-1248	0.374103	13	High	BiTargeting|CoMeTa|DIANA|ElMMo3|MBStar|MirAncesTar|miRDB|MirMAP|MirTar|Mirza-G|PACCMIT|RNAhybrid|TargetSpy
MAP2K6	Q96I25		hsa-miR-1248	0.373764	13	High	CoMeTa|Cupid|DIANA|ElMMo3|MBStar|MirAncesTar|miRDB|MirMAP|MirTar|Mirza-G|RepTar|RNAhybrid|TargetSpy
RBM17	A0AV96		hsa-miR-1248	0.373542	12	High	CoMeTa|Cupid|DIANA|ElMMo3|MBStar|MirAncesTar|miRDB|MirMAP|MirTar|Mirza-G|RNAhybrid|TargetSpy
RBM47	P08123		hsa-miR-1248	0.371678	12	High	CoMeTa|Cupid|DIANA|ElMMo3|MBStar|MirAncesTar|miRDB|MirMAP|MirTar|Mirza-G|RNAhybrid|TargetSpy
COL1A2	P35573		hsa-miR-1248	0.367606	11	High	CoMeTa|DIANA|ElMMo3|MBStar|MirAncesTar|miRDB|MirMAP|MirSNP|MirTar|Mirza-G|TargetSpy
AGL	O43639		hsa-miR-1248	0.366717	13	High	CoMeTa|DIANA|ElMMo3|MBStar|MirAncesTar|miRDB|MirMAP|MirSNP|Mirza-G|PACCMIT|RepTar|RNAhybrid|TargetSpy
NCK2	P14921		hsa-miR-1248	0.364624	13	High	BiTargeting|CoMeTa|Cupid|DIANA|ElMMo3|MBStar|MirAncesTar|miRDB|MirMAP|MirSNP|Mirza-G|RepTar|RNAhybrid
ETS1	O00161		hsa-miR-1248	0.362224	11	High	CoMeTa|DIANA|ElMMo3|MBStar|MirAncesTar|miRDB|MirMAP|MirTar|Mirza-G|RNAhybrid|TargetSpy
SNAP23	Q06413		hsa-miR-1248	0.362161	12	High	BiTargeting|CoMeTa|Cupid|DIANA|ElMMo3|MBStar|MirAncesTar|miRDB|MirMAP|Mirza-G|RepTar|RNAhybrid
MEF2C	P10155		hsa-miR-1248	0.36154	12	High	CoMeTa|DIANA|ElMMo3|MBStar|MirAncesTar|miRDB|MirMAP|MirTar|Mirza-G|RNA22|RNAhybrid|TargetSpy
TROVE2	Q68CQ4		hsa-miR-1248	0.360862	13	High	BiTargeting|CoMeTa|DIANA|ElMMo3|MBStar|MirAncesTar|miRDB|MirMAP|MirTar|Mirza-G|RepTar|RNA22|TargetSpy
DIEXF	Q01362		hsa-miR-1248	0.360657	12	High	CoMeTa|DIANA|ElMMo3|MBStar|MirAncesTar|miRDB|MirMAP|MirSNP|MirTar|Mirza-G|RepTar|TargetSpy
MS4A2	O95980		hsa-miR-1248	0.359488	10	High	CoMeTa|Cupid|DIANA|ElMMo3|MirAncesTar|miRDB|MirMAP|Mirza-G|RNAhybrid|TargetSpy
RECK	Q16595		hsa-miR-1248	0.358746	11	High	CoMeTa|DIANA|ElMMo3|MBStar|MirAncesTar|miRDB|MirMAP|MirSNP|MirTar|Mirza-G|RNAhybrid
FXN	P58400		hsa-miR-1248	0.35828	11	High	CoMeTa|DIANA|ElMMo3|MBStar|MirAncesTar|miRDB|MirMAP|MirTar|Mirza-G|RepTar|RNAhybrid
NRXN1	Q86X10		hsa-miR-1248	0.356224	12	High	CoMeTa|DIANA|ElMMo3|MBStar|MirAncesTar|miRDB|MirMAP|MirSNP|Mirza-G|PACCMIT|RepTar|RNAhybrid
RALGAPB	O94915		hsa-miR-1248	0.355146	12	High	CoMeTa|DIANA|ElMMo3|MBStar|MirAncesTar|miRDB|MirMAP|MirSNP|Mirza-G|PACCMIT|RNAhybrid|TargetSpy
FRYL	O43768		hsa-miR-1248	0.354917	14	High	BiTargeting|CoMeTa|DIANA|ElMMo3|MBStar|MirAncesTar|miRDB|MirMAP|Mirza-G|PACCMIT|RepTar|RNA22|RNAhybrid|TargetSpy
ENSA	P08172		hsa-miR-1248	0.354759	10	High	CoMeTa|DIANA|ElMMo3|MBStar|MirAncesTar|miRDB|MirMAP|MirTar|Mirza-G|RNAhybrid
CHRM2	P18583		hsa-miR-1248	0.354586	9	High	CoMeTa|Cupid|DIANA|ElMMo3|MirAncesTar|MirMAP|Mirza-G|RNAhybrid|TargetSpy
SON	Q9UL26		hsa-miR-1248	0.353726	12	High	CoMeTa|DIANA|ElMMo3|MBStar|MirAncesTar|miRDB|MirMAP|MirSNP|MirTar|Mirza-G|RepTar|TargetSpy
RAB22A	Q6IE81		hsa-miR-1248	0.352169	13	High	CoMeTa|DIANA|ElMMo3|MBStar|MirAncesTar|miRDB|MirMAP|MirSNP|MirTar|Mirza-G|RepTar|RNAhybrid|TargetSpy
JADE1	Q14527		hsa-miR-1248	0.351829	12	High	CoMeTa|DIANA|ElMMo3|MBStar|MirAncesTar|miRDB|MirMAP|MirTar|Mirza-G|RepTar|RNAhybrid|TargetSpy
HLTF	Q92519		hsa-miR-1248	0.351663	12	High	BiTargeting|CoMeTa|DIANA|ElMMo3|MBStar|MirAncesTar|miRDB|MirMAP|Mirza-G|PACCMIT|RepTar|RNAhybrid
TRIB2	Q53F19		hsa-miR-1248	0.350529	10	High	CoMeTa|DIANA|ElMMo3|MirAncesTar|miRDB|MirMAP|MirSNP|Mirza-G|PACCMIT|TargetSpy
NCBP3	Q96RU2		hsa-miR-1248	0.3502	11	High	Cupid|DIANA|ElMMo3|MirAncesTar|miRDB|MirMAP|MirTar|Mirza-G|RepTar|RNAhybrid|TargetSpy
USP28	Q9UKQ2		hsa-miR-1248	0.350184	13	High	BiTargeting|DIANA|ElMMo3|MBStar|MirAncesTar|miRDB|MirMAP|MirSNP|MirTar|Mirza-G|RepTar|RNAhybrid|TargetSpy
ADAM28	P60842		hsa-miR-1248	0.350114	10	High	CoMeTa|DIANA|ElMMo3|MirAncesTar|miRDB|MirMAP|MirTar|Mirza-G|PACCMIT|RNAhybrid
EIF4A1	P18847		hsa-miR-1248	0.350091	12	High	CoMeTa|DIANA|ElMMo3|MirAncesTar|miRDB|MirMAP|MirTar|Mirza-G|PACCMIT|RNA22|RNAhybrid|TargetSpy
ATF3	Q99502		hsa-miR-1248	0.349292	12	High	CoMeTa|Cupid|DIANA|ElMMo3|MBStar|MirAncesTar|miRDB|MirMAP|Mirza-G|RepTar|RNAhybrid|TargetSpy
EYA1	P60893		hsa-miR-1248	0.349279	13	High	BiTargeting|CoMeTa|Cupid|DIANA|ElMMo3|MBStar|MirAncesTar|miRDB|MirMAP|Mirza-G|RepTar|RNAhybrid|TargetSpy
GPR85	P49619		hsa-miR-1248	0.348618	12	High	CoMeTa|DIANA|ElMMo3|MBStar|MirAncesTar|miRDB|MirMAP|MirTar|Mirza-G|RepTar|RNAhybrid|TargetSpy
DGKG	Q16881		hsa-miR-1248	0.347601	11	High	CoMeTa|DIANA|ElMMo3|MBStar|MirAncesTar|miRDB|MirMAP|MirTar|Mirza-G|RepTar|RNAhybrid
TXNRD1	O75840		hsa-miR-1248	0.347254	12	High	CoMeTa|DIANA|ElMMo3|MBStar|MirAncesTar|miRDB|MirMAP|MirSNP|Mirza-G|PACCMIT|RNAhybrid|TargetSpy
KLF7	Q96RR4		hsa-miR-1248	0.346522	11	High	CoMeTa|DIANA|ElMMo3|MBStar|MirAncesTar|miRDB|MirMAP|MirTar|Mirza-G|RepTar|RNAhybrid
CAMKK2	O76041		hsa-miR-1248	0.346369	11	High	CoMeTa|Cupid|DIANA|ElMMo3|MBStar|MirAncesTar|miRDB|MirMAP|Mirza-G|RNAhybrid|TargetSpy
NEBL	O95319		hsa-miR-1248	0.346065	11	High	CoMeTa|Cupid|DIANA|ElMMo3|MBStar|MirAncesTar|miRDB|MirMAP|RepTar|RNAhybrid|TargetSpy
CELF2	Q7L804		hsa-miR-1248	0.345638	10	High	CoMeTa|Cupid|DIANA|ElMMo3|MBStar|MirAncesTar|miRDB|MirMAP|MirSNP|MirTar
RAB11FIP2	P52803		hsa-miR-1248	0.345474	12	High	CoMeTa|DIANA|ElMMo3|MBStar|MirAncesTar|miRDB|MirMAP|Mirza-G|PACCMIT|RepTar|RNAhybrid|TargetSpy
EFNA5	P02765		hsa-miR-1248	0.345387	10	High	CoMeTa|DIANA|ElMMo3|MirAncesTar|miRDB|MirMAP|MirTar|PACCMIT|RepTar|RNAhybrid
AHSG	O75112		hsa-miR-1248	0.344443	12	High	CoMeTa|DIANA|ElMMo3|MBStar|MirAncesTar|miRDB|MirMAP|MirTar|Mirza-G|RepTar|RNAhybrid|TargetSpy
LDB3	Q16828		hsa-miR-1248	0.344252	10	High	CoMeTa|Cupid|ElMMo3|MirAncesTar|miRDB|MirMAP|Mirza-G|RepTar|RNAhybrid|TargetSpy
DUSP6	P50579		hsa-miR-1248	0.343677	11	High	CoMeTa|DIANA|ElMMo3|MirAncesTar|miRDB|MirMAP|MirTar|Mirza-G|RepTar|RNAhybrid|TargetSpy
METAP2	O14786		hsa-miR-1248	0.343507	12	High	CoMeTa|Cupid|DIANA|ElMMo3|MBStar|MirAncesTar|miRDB|MirMAP|MirSNP|Mirza-G|RepTar|RNAhybrid
NRP1	Q15256		hsa-miR-1248	0.343349	12	High	CoMeTa|DIANA|ElMMo3|MBStar|MirAncesTar|miRDB|MirMAP|MirTar|Mirza-G|PACCMIT|RNAhybrid|TargetSpy
PTPRR	Q96PX1		hsa-miR-1248	0.342957	12	High	Cupid|DIANA|ElMMo3|MirAncesTar|miRDB|MirMAP|MirSNP|MirTar|Mirza-G|RepTar|RNAhybrid|TargetSpy
RNF157	O14544		hsa-miR-1248	0.342883	12	High	CoMeTa|DIANA|ElMMo3|MBStar|MirAncesTar|miRDB|MirMAP|MirSNP|MirTar|Mirza-G|RNAhybrid|TargetSpy
SOCS6	Q86U42		hsa-miR-1248	0.342397	10	High	CoMeTa|DIANA|ElMMo3|MirAncesTar|miRDB|MirMAP|MirTar|PACCMIT|RNAhybrid|TargetSpy
PABPN1	P48552		hsa-miR-1248	0.342127	10	High	CoMeTa|Cupid|DIANA|ElMMo3|MirAncesTar|miRDB|MirMAP|MirSNP|RepTar|TargetSpy
NRIP1	Q9UHI8		hsa-miR-1248	0.341813	11	High	CoMeTa|DIANA|ElMMo3|MBStar|MirAncesTar|miRDB|MirMAP|MirTar|Mirza-G|RepTar|TargetSpy
ADAMTS1	Q6XUX3		hsa-miR-1248	0.341613	13	High	CoMeTa|DIANA|ElMMo3|MBStar|MirAncesTar|miRDB|MirMAP|MirTar|Mirza-G|RepTar|RNA22|RNAhybrid|TargetSpy
DSTYK	Q8IZP9		hsa-miR-1248	0.341385	11	High	CoMeTa|DIANA|ElMMo3|MBStar|MirAncesTar|miRDB|MirMAP|MirTar|Mirza-G|RNAhybrid|TargetSpy
ADGRG2	Q14156		hsa-miR-1248	0.341224	9	High	CoMeTa|DIANA|ElMMo3|MirAncesTar|miRDB|MirMAP|MirTar|Mirza-G|PACCMIT
EFR3A	Q9BY67		hsa-miR-1248	0.340609	12	High	BiTargeting|CoMeTa|Cupid|DIANA|ElMMo3|MBStar|MirAncesTar|miRDB|MirMAP|Mirza-G|RepTar|RNAhybrid
CADM1	Q92783		hsa-miR-1248	0.339807	10	High	BiTargeting|CoMeTa|DIANA|ElMMo3|MirAncesTar|miRDB|MirMAP|Mirza-G|PACCMIT|RNAhybrid
STAM	P13473		hsa-miR-1248	0.339604	10	High	Cupid|ElMMo3|MBStar|MirAncesTar|miRDB|MirSNP|MirTar|Mirza-G|RNAhybrid|TargetSpy
LAMP2	P56177		hsa-miR-1248	0.338782	11	High	Cupid|DIANA|ElMMo3|MBStar|MirAncesTar|miRDB|MirMAP|MirTar|Mirza-G|RepTar|RNAhybrid
DLX1	Q8N143		hsa-miR-1248	0.338141	10	High	DIANA|ElMMo3|MBStar|MirAncesTar|miRDB|MirMAP|MirTar|Mirza-G|RNAhybrid|TargetSpy
BCL6B	O00409		hsa-miR-1248	0.337942	11	High	CoMeTa|DIANA|ElMMo3|MBStar|MirAncesTar|miRDB|MirMAP|Mirza-G|PACCMIT|RepTar|RNAhybrid
FOXN3	Q92913		hsa-miR-1248	0.337939	11	High	CoMeTa|Cupid|DIANA|ElMMo3|MBStar|MirAncesTar|MirMAP|Mirza-G|RepTar|RNAhybrid|TargetSpy
FGF13	Q9UKP5		hsa-miR-1248	0.337319	10	High	CoMeTa|Cupid|DIANA|ElMMo3|MBStar|MirAncesTar|miRDB|MirMAP|Mirza-G|RepTar
ADAMTS6	O43752		hsa-miR-1248	0.33711	10	High	CoMeTa|Cupid|DIANA|ElMMo3|MirAncesTar|miRDB|MirMAP|MirSNP|Mirza-G|RNA22
STX6	O00571		hsa-miR-1248	0.336325	9	High	BiTargeting|CoMeTa|Cupid|DIANA|ElMMo3|MirAncesTar|MirMAP|RepTar|RNAhybrid
DDX3X	Q9Y4X4		hsa-miR-1248	0.33565	11	High	BiTargeting|CoMeTa|DIANA|ElMMo3|MBStar|MirAncesTar|miRDB|MirMAP|MirTar|PACCMIT|RepTar
KLF12	P41236		hsa-miR-1248	0.335591	11	High	CoMeTa|Cupid|DIANA|ElMMo3|MBStar|MirAncesTar|miRDB|MirMAP|Mirza-G|RNAhybrid|TargetSpy
PPP1R2	Q8IU60		hsa-miR-1248	0.334801	12	High	BiTargeting|CoMeTa|DIANA|ElMMo3|MBStar|MirAncesTar|miRDB|MirMAP|Mirza-G|RepTar|RNAhybrid|TargetSpy
DCP2	P40337		hsa-miR-1248	0.334471	12	High	CoMeTa|DIANA|ElMMo3|MBStar|MirAncesTar|miRDB|MirMAP|MirSNP|MirTar|Mirza-G|RepTar|TargetSpy
VHL	P19086		hsa-miR-1248	0.334292	10	High	CoMeTa|DIANA|ElMMo3|MirAncesTar|miRDB|MirMAP|Mirza-G|PACCMIT|RNAhybrid|TargetSpy
GNAZ	Q92624		hsa-miR-1248	0.333912	9	High	CoMeTa|Cupid|DIANA|ElMMo3|MirAncesTar|MirMAP|Mirza-G|RNAhybrid|TargetSpy
APPBP2	P35612		hsa-miR-1248	0.333699	12	High	CoMeTa|DIANA|ElMMo3|MBStar|MirAncesTar|miRDB|MirMAP|MirSNP|MirTar|PACCMIT|RepTar|RNAhybrid
ADD2	Q92543		hsa-miR-1248	0.333633	12	High	CoMeTa|DIANA|ElMMo3|MirAncesTar|miRDB|MirMAP|MirSNP|MirTar|Mirza-G|RepTar|RNAhybrid|TargetSpy
SNX19	P24468		hsa-miR-1248	0.333403	12	High	CoMeTa|DIANA|ElMMo3|MBStar|MirAncesTar|miRDB|MirMAP|MirSNP|MirTar|Mirza-G|RepTar|RNAhybrid
NR2F2	P05204		hsa-miR-1248	0.33299	12	High	CoMeTa|DIANA|ElMMo3|MirAncesTar|miRDB|MirMAP|MirSNP|Mirza-G|PACCMIT|RepTar|RNA22|RNAhybrid
HMGN2	P10092		hsa-miR-1248	0.332778	9	High	CoMeTa|Cupid|ElMMo3|MirAncesTar|MirMAP|MirSNP|PACCMIT|RNAhybrid|TargetSpy
CALCB	O14917		hsa-miR-1248	0.332703	11	High	CoMeTa|Cupid|ElMMo3|MBStar|MirAncesTar|miRDB|MirMAP|Mirza-G|RepTar|RNAhybrid|TargetSpy
PCDH17	Q9Y4I1		hsa-miR-1248	0.33118	12	High	CoMeTa|DIANA|ElMMo3|MBStar|MirAncesTar|miRDB|MirMAP|MirTar|Mirza-G|RepTar|RNAhybrid|TargetSpy
MYO5A	Q01064		hsa-miR-1248	0.330964	11	High	CoMeTa|ElMMo3|MirAncesTar|miRDB|MirMAP|MirSNP|MirTar|PACCMIT|RepTar|RNAhybrid|TargetSpy
PDE1B	P21580		hsa-miR-1248	0.330862	12	High	CoMeTa|DIANA|ElMMo3|MBStar|MirAncesTar|miRDB|MirMAP|MirTar|Mirza-G|PACCMIT|RepTar|RNAhybrid
TNFAIP3	O15075		hsa-miR-1248	0.330523	12	High	CoMeTa|Cupid|DIANA|ElMMo3|MBStar|MirAncesTar|miRDB|MirMAP|MirTar|Mirza-G|RNAhybrid|TargetSpy
DCLK1	P26196		hsa-miR-1248	0.330427	12	High	CoMeTa|DIANA|ElMMo3|MBStar|MirAncesTar|miRDB|MirMAP|MirTar|Mirza-G|RepTar|RNAhybrid|TargetSpy
DDX6	Q13148		hsa-miR-1248	0.330417	12	High	CoMeTa|DIANA|ElMMo3|MBStar|MirAncesTar|miRDB|MirMAP|Mirza-G|PACCMIT|RepTar|RNA22|RNAhybrid
TARDBP	Q9UHC1		hsa-miR-1248	0.32969	12	High	CoMeTa|DIANA|ElMMo3|MBStar|MirAncesTar|miRDB|MirMAP|MirTar|Mirza-G|PACCMIT|RepTar|RNAhybrid
MLH3	Q9HCK1		hsa-miR-1248	0.329367	10	High	DIANA|ElMMo3|MBStar|MirAncesTar|miRDB|MirMAP|MirTar|Mirza-G|RepTar|TargetSpy
ZDBF2	Q96MU7		hsa-miR-1248	0.328963	11	High	CoMeTa|DIANA|ElMMo3|MBStar|MirAncesTar|miRDB|MirMAP|MirTar|Mirza-G|RNAhybrid|TargetSpy
YTHDC1	O94955		hsa-miR-1248	0.328691	10	High	CoMeTa|DIANA|ElMMo3|MBStar|MirAncesTar|miRDB|MirMAP|Mirza-G|RepTar|RNAhybrid
RHOBTB3	Q9Y520		hsa-miR-1248	0.328134	10	High	CoMeTa|Cupid|DIANA|ElMMo3|MirAncesTar|miRDB|MirMAP|Mirza-G|RNA22|RNAhybrid
PRRC2C	Q15648		hsa-miR-1248	0.327533	10	High	CoMeTa|Cupid|DIANA|ElMMo3|MirAncesTar|miRDB|MirMAP|Mirza-G|RepTar|RNAhybrid
MED1	Q9UHC6		hsa-miR-1248	0.32704	12	High	BiTargeting|CoMeTa|DIANA|ElMMo3|MBStar|MirAncesTar|miRDB|MirMAP|MirTar|Mirza-G|RNAhybrid|TargetSpy
CNTNAP2	Q9H4G0		hsa-miR-1248	0.32652	11	High	CoMeTa|DIANA|ElMMo3|MBStar|MirAncesTar|miRDB|MirMAP|PACCMIT|RepTar|RNAhybrid|TargetSpy
EPB41L1	Q9P2G4		hsa-miR-1248	0.326142	11	High	DIANA|ElMMo3|MirAncesTar|miRDB|MirMAP|MirTar|Mirza-G|PACCMIT|RNA22|RNAhybrid|TargetSpy
MAP10	Q13114		hsa-miR-1248	0.325954	11	High	BiTargeting|CoMeTa|DIANA|ElMMo3|MBStar|MirAncesTar|miRDB|MirMAP|Mirza-G|RepTar|RNAhybrid
TRAF3	P23443		hsa-miR-1248	0.325464	11	High	CoMeTa|DIANA|ElMMo3|MirAncesTar|miRDB|MirMAP|MirTar|Mirza-G|RepTar|RNAhybrid|TargetSpy
RPS6KB1	Q8IWD4		hsa-miR-1248	0.325075	11	High	DIANA|ElMMo3|MirAncesTar|miRDB|MirMAP|MirSNP|MirTar|Mirza-G|RepTar|RNAhybrid|TargetSpy
CCDC117	P35398		hsa-miR-1248	0.325047	9	High	Cupid|DIANA|ElMMo3|MBStar|MirAncesTar|miRDB|MirMAP|Mirza-G|RNAhybrid
RORA	P35318		hsa-miR-1248	0.324838	10	High	CoMeTa|Cupid|DIANA|ElMMo3|MBStar|MirAncesTar|miRDB|MirMAP|Mirza-G|RNAhybrid
ADM	O75116		hsa-miR-1248	0.324546	9	High	CoMeTa|Cupid|DIANA|ElMMo3|MirAncesTar|miRDB|MirMAP|Mirza-G|RNAhybrid
ROCK2	Q12965		hsa-miR-1248	0.324359	12	High	CoMeTa|DIANA|ElMMo3|MBStar|MirAncesTar|miRDB|MirMAP|MirTar|Mirza-G|RepTar|RNAhybrid|TargetSpy
MYO1E	Q7Z3U7		hsa-miR-1248	0.323659	8	High	CoMeTa|Cupid|DIANA|MBStar|MirAncesTar|MirMAP|Mirza-G|RNAhybrid
MON2	Q9Y6Y1		hsa-miR-1248	0.323544	11	High	CoMeTa|Cupid|DIANA|ElMMo3|MBStar|MirAncesTar|MirMAP|RepTar|RNA22|RNAhybrid|TargetSpy
CAMTA1	Q13118		hsa-miR-1248	0.32245	10	High	Cupid|DIANA|ElMMo3|MBStar|MirAncesTar|miRDB|MirMAP|MirTar|Mirza-G|RNAhybrid
KLF10	Q9BYG0		hsa-miR-1248	0.322101	11	High	Cupid|DIANA|ElMMo3|MBStar|MirAncesTar|miRDB|MirMAP|MirTar|Mirza-G|RNAhybrid|TargetSpy
B3GNT5	P24522		hsa-miR-1248	0.321835	12	High	CoMeTa|DIANA|ElMMo3|MirAncesTar|miRDB|MirMAP|MirTar|Mirza-G|RepTar|RNA22|RNAhybrid|TargetSpy
GADD45A	O14977		hsa-miR-1248	0.321688	10	High	CoMeTa|Cupid|DIANA|ElMMo3|MirAncesTar|miRDB|MirMAP|Mirza-G|RNAhybrid|TargetSpy
AZIN1	P51812		hsa-miR-1248	0.321532	10	High	CoMeTa|Cupid|DIANA|ElMMo3|MBStar|MirAncesTar|miRDB|MirMAP|RepTar|TargetSpy
RPS6KA3	Q71UI9		hsa-miR-1248	0.321519	7	High	CoMeTa|Cupid|ElMMo3|MirAncesTar|MirMAP|MirSNP|RNAhybrid
H2AFV	P41970		hsa-miR-1248	0.321267	8	High	CoMeTa|Cupid|DIANA|MirAncesTar|miRDB|MirMAP|Mirza-G|RNAhybrid
ELK3	O14776		hsa-miR-1248	0.321148	8	High	CoMeTa|Cupid|DIANA|MBStar|MirAncesTar|MirMAP|Mirza-G|RNAhybrid
TCERG1	Q9UMS6		hsa-miR-1248	0.32066	12	High	BiTargeting|CoMeTa|DIANA|ElMMo3|MBStar|MirAncesTar|miRDB|MirMAP|MirSNP|MirTar|Mirza-G|RNAhybrid
SYNPO2	Q969P5		hsa-miR-1248	0.320468	10	High	BiTargeting|DIANA|MBStar|MirAncesTar|miRDB|MirMAP|MirSNP|MirTar|Mirza-G|RNAhybrid
FBXO32	O75084		hsa-miR-1248	0.320408	10	High	CoMeTa|DIANA|ElMMo3|MBStar|MirAncesTar|miRDB|MirMAP|MirTar|Mirza-G|TargetSpy
FZD7	Q9H0V1		hsa-miR-1248	0.320361	11	High	CoMeTa|DIANA|ElMMo3|MBStar|MirAncesTar|miRDB|MirMAP|MirTar|Mirza-G|RNAhybrid|TargetSpy
TMEM168	Q9NVK5		hsa-miR-1248	0.319694	11	High	Cupid|DIANA|ElMMo3|MBStar|MirAncesTar|miRDB|MirMAP|MirTar|Mirza-G|RNAhybrid|TargetSpy
FGFR1OP2	Q15629		hsa-miR-1248	0.319464	11	High	BiTargeting|CoMeTa|DIANA|ElMMo3|MBStar|MirAncesTar|miRDB|MirMAP|Mirza-G|PACCMIT|RNAhybrid
TRAM1	Q5VTL8		hsa-miR-1248	0.319414	12	High	BiTargeting|CoMeTa|Cupid|DIANA|ElMMo3|MBStar|MirAncesTar|miRDB|MirMAP|Mirza-G|RNA22|RNAhybrid
PRPF38B	Q9H5Y7		hsa-miR-1248	0.319369	10	High	BiTargeting|Cupid|DIANA|ElMMo3|MirAncesTar|miRDB|MirMAP|Mirza-G|RepTar|RNAhybrid
SLITRK6	Q6GYQ0		hsa-miR-1248	0.318885	11	High	CoMeTa|DIANA|ElMMo3|MBStar|MirAncesTar|miRDB|MirMAP|MirTar|Mirza-G|RNAhybrid|TargetSpy
RALGAPA1	Q9H3N1		hsa-miR-1248	0.318764	10	High	CoMeTa|DIANA|ElMMo3|MBStar|MirAncesTar|miRDB|MirMAP|Mirza-G|RNAhybrid|TargetSpy
TMX1	P16473		hsa-miR-1248	0.318673	12	High	DIANA|ElMMo3|MirAncesTar|miRDB|MirMAP|MirSNP|MirTar|Mirza-G|PACCMIT|RepTar|RNAhybrid|TargetSpy
TSHR	P35568		hsa-miR-1248	0.318639	9	High	CoMeTa|Cupid|DIANA|ElMMo3|MBStar|MirAncesTar|miRDB|MirMAP|Mirza-G
IRS1	Q7L1I2		hsa-miR-1248	0.318594	10	High	CoMeTa|DIANA|ElMMo3|MBStar|MirAncesTar|miRDB|MirMAP|MirTar|Mirza-G|RNAhybrid
SV2B	Q9UHF7		hsa-miR-1248	0.318572	9	High	CoMeTa|DIANA|ElMMo3|MirAncesTar|miRDB|MirMAP|PACCMIT|RepTar|RNAhybrid
TRPS1	Q9P266		hsa-miR-1248	0.318429	10	High	CoMeTa|DIANA|ElMMo3|MBStar|MirAncesTar|miRDB|MirMAP|MirTar|Mirza-G|RepTar
JCAD	Q6P3S1		hsa-miR-1248	0.318421	11	High	CoMeTa|DIANA|ElMMo3|MBStar|MirAncesTar|MirMAP|MirTar|Mirza-G|RNA22|RNAhybrid|TargetSpy
DENND1B	Q8NDV2		hsa-miR-1248	0.317185	9	High	DIANA|ElMMo3|MBStar|MirAncesTar|miRDB|MirMAP|MirSNP|MirTar|RepTar
GPR26	Q8N4Q0		hsa-miR-1248	0.316269	11	High	Cupid|DIANA|ElMMo3|MirAncesTar|miRDB|MirMAP|MirSNP|Mirza-G|RepTar|RNAhybrid|TargetSpy
ZADH2	Q9Y2E4		hsa-miR-1248	0.316263	10	High	BiTargeting|Cupid|DIANA|ElMMo3|MirAncesTar|miRDB|MirMAP|Mirza-G|RepTar|RNAhybrid
DIP2C	P29966		hsa-miR-1248	0.315623	10	High	CoMeTa|DIANA|ElMMo3|MBStar|MirAncesTar|miRDB|MirMAP|Mirza-G|RepTar|TargetSpy
MARCKS	Q13322		hsa-miR-1248	0.315528	11	High	BiTargeting|CoMeTa|Cupid|DIANA|ElMMo3|MBStar|MirAncesTar|MirMAP|Mirza-G|RepTar|RNAhybrid
GRB10	Q5SVQ8		hsa-miR-1248	0.315343	9	High	ElMMo3|MBStar|MirAncesTar|miRDB|MirTar|Mirza-G|RepTar|RNA22|TargetSpy
ZBTB41	Q13873		hsa-miR-1248	0.314958	10	High	CoMeTa|DIANA|ElMMo3|MBStar|MirAncesTar|miRDB|MirMAP|Mirza-G|RepTar|TargetSpy
BMPR2	Q1L5Z9		hsa-miR-1248	0.314885	12	High	DIANA|ElMMo3|MBStar|MirAncesTar|miRDB|MirMAP|MirSNP|MirTar|Mirza-G|RepTar|RNAhybrid|TargetSpy
LONRF2	Q8WXS5		hsa-miR-1248	0.314782	8	High	DIANA|ElMMo3|MBStar|MirAncesTar|miRDB|MirMAP|MirTar|Mirza-G
CACNG8	Q5T619		hsa-miR-1248	0.314455	12	High	DIANA|ElMMo3|MBStar|MirAncesTar|miRDB|MirMAP|MirSNP|MirTar|Mirza-G|RepTar|RNAhybrid|TargetSpy
ZNF648	P50549		hsa-miR-1248	0.312908	11	High	DIANA|ElMMo3|MBStar|MirAncesTar|miRDB|MirMAP|MirTar|Mirza-G|PACCMIT|RNAhybrid|TargetSpy
ETV1	P16615		hsa-miR-1248	0.312529	11	High	CoMeTa|DIANA|ElMMo3|MBStar|MirAncesTar|miRDB|MirMAP|MirSNP|Mirza-G|RNAhybrid|TargetSpy
ATP2A2	O95948		hsa-miR-1248	0.312508	10	High	CoMeTa|DIANA|ElMMo3|MBStar|MirAncesTar|miRDB|MirMAP|PACCMIT|RepTar|TargetSpy
ONECUT2	P48444		hsa-miR-1248	0.31243	11	High	CoMeTa|DIANA|ElMMo3|MBStar|MirAncesTar|miRDB|MirMAP|Mirza-G|RepTar|RNAhybrid|TargetSpy
ARCN1	Q86VK4		hsa-miR-1248	0.312301	11	High	BiTargeting|CoMeTa|DIANA|ElMMo3|MirAncesTar|miRDB|MirMAP|PACCMIT|RepTar|RNAhybrid|TargetSpy
ZNF410	Q53TQ3		hsa-miR-1248	0.311988	10	High	CoMeTa|DIANA|ElMMo3|MBStar|MirAncesTar|miRDB|MirMAP|MirSNP|PACCMIT|RepTar
INO80D	Q12948		hsa-miR-1248	0.311658	10	High	CoMeTa|Cupid|DIANA|ElMMo3|MirAncesTar|miRDB|MirMAP|Mirza-G|RNAhybrid|TargetSpy
FOXC1	Q13239		hsa-miR-1248	0.311294	11	High	CoMeTa|DIANA|ElMMo3|MBStar|MirAncesTar|miRDB|MirMAP|Mirza-G|RepTar|RNAhybrid|TargetSpy
SLA	Q99707		hsa-miR-1248	0.311263	11	High	CoMeTa|DIANA|ElMMo3|MBStar|MirAncesTar|miRDB|MirMAP|MirSNP|MirTar|RNA22|TargetSpy
MTR	Q01484		hsa-miR-1248	0.311141	12	High	CoMeTa|DIANA|ElMMo3|MBStar|MirAncesTar|miRDB|MirMAP|MirSNP|Mirza-G|RepTar|RNAhybrid|TargetSpy
ANK2	Q8N3X6		hsa-miR-1248	0.310185	9	High	Cupid|DIANA|ElMMo3|MirAncesTar|miRDB|MirMAP|MirTar|Mirza-G|RNAhybrid
LCORL	O95379		hsa-miR-1248	0.309454	10	High	CoMeTa|DIANA|ElMMo3|MBStar|MirAncesTar|miRDB|MirMAP|Mirza-G|RNAhybrid|TargetSpy
TNFAIP8	Q7Z3B1		hsa-miR-1248	0.309178	10	High	DIANA|ElMMo3|MBStar|MirAncesTar|miRDB|MirMAP|MirTar|Mirza-G|RepTar|TargetSpy
NEGR1	P55809		hsa-miR-1248	0.309141	11	High	CoMeTa|DIANA|ElMMo3|MBStar|MirAncesTar|miRDB|MirMAP|MirSNP|Mirza-G|RepTar|RNAhybrid
OXCT1	Q9H0C5		hsa-miR-1248	0.308934	9	High	CoMeTa|DIANA|ElMMo3|MirAncesTar|miRDB|MirMAP|Mirza-G|RepTar|RNAhybrid
BTBD1	Q12947		hsa-miR-1248	0.308807	9	High	CoMeTa|Cupid|DIANA|ElMMo3|MirAncesTar|miRDB|MirMAP|Mirza-G|RepTar
FOXF2	Q12972		hsa-miR-1248	0.308256	13	High	CoMeTa|DIANA|ElMMo3|MBStar|MirAncesTar|miRDB|MirMAP|MirTar|Mirza-G|RepTar|RNA22|RNAhybrid|TargetSpy
PPP1R8	O15033		hsa-miR-1248	0.307803	11	High	Cupid|DIANA|ElMMo3|MBStar|MirAncesTar|miRDB|MirMAP|Mirza-G|RepTar|RNAhybrid|TargetSpy
AREL1	Q9UN86		hsa-miR-1248	0.307793	7	High	CoMeTa|Cupid|DIANA|MBStar|MirAncesTar|MirMAP|RNAhybrid
G3BP2	Q15303		hsa-miR-1248	0.307668	10	High	CoMeTa|DIANA|ElMMo3|MBStar|MirAncesTar|miRDB|MirMAP|Mirza-G|RepTar|TargetSpy
ERBB4	Q5VW38		hsa-miR-1248	0.307012	11	High	CoMeTa|DIANA|ElMMo3|MBStar|MirAncesTar|miRDB|MirMAP|MirTar|Mirza-G|RNAhybrid|TargetSpy
GPR107	Q9NPH5		hsa-miR-1248	0.306763	11	High	CoMeTa|DIANA|ElMMo3|MBStar|MirAncesTar|miRDB|MirMAP|MirTar|RepTar|RNAhybrid|TargetSpy
NOX4	Q8N0V5		hsa-miR-1248	0.306484	10	High	CoMeTa|DIANA|ElMMo3|MBStar|MirAncesTar|miRDB|MirMAP|MirTar|Mirza-G|RNAhybrid
GCNT2	P04150		hsa-miR-1248	0.306155	10	High	CoMeTa|DIANA|ElMMo3|MBStar|MirAncesTar|miRDB|MirMAP|MirSNP|Mirza-G|RNAhybrid
NR3C1	Q6ZNB7		hsa-miR-1248	0.305562	11	High	DIANA|ElMMo3|MBStar|MirAncesTar|miRDB|MirMAP|MirTar|Mirza-G|RepTar|RNAhybrid|TargetSpy
AGMO	Q14683		hsa-miR-1248	0.305131	9	High	CoMeTa|DIANA|ElMMo3|MBStar|MirAncesTar|MirMAP|Mirza-G|RepTar|RNAhybrid
SMC1A	Q9H1Y3		hsa-miR-1248	0.304987	12	High	CoMeTa|DIANA|ElMMo3|MBStar|MirAncesTar|miRDB|MirMAP|MirTar|Mirza-G|RepTar|RNAhybrid|TargetSpy
OPN3	P0DP23		hsa-miR-1248	0.304918	11	High	CoMeTa|DIANA|ElMMo3|MBStar|MirAncesTar|miRDB|MirMAP|Mirza-G|RepTar|RNAhybrid|TargetSpy
CALM1	Q9UBS5		hsa-miR-1248	0.304283	8	High	BiTargeting|CoMeTa|DIANA|MirAncesTar|MirMAP|PACCMIT|RepTar|RNAhybrid
GABBR1	Q7Z5Q1		hsa-miR-1248	0.304088	10	High	DIANA|ElMMo3|MBStar|MirAncesTar|miRDB|MirMAP|Mirza-G|PACCMIT|RepTar|RNAhybrid
CPEB2	Q9H0K1		hsa-miR-1248	0.303831	10	High	CoMeTa|DIANA|ElMMo3|MBStar|MirAncesTar|miRDB|MirMAP|MirTar|Mirza-G|PACCMIT
SIK2			hsa-miR-1248	0.303587	8	High	CoMeTa|ElMMo3|MBStar|MirAncesTar|miRDB|MirTar|PACCMIT|TargetSpy
HDGFL3	O60716		hsa-miR-1248	0.30265	10	High	CoMeTa|DIANA|ElMMo3|MBStar|MirAncesTar|miRDB|MirMAP|Mirza-G|PACCMIT|RNAhybrid
CTNND1	Q15800		hsa-miR-1248	0.302357	12	High	CoMeTa|DIANA|ElMMo3|MBStar|MirAncesTar|miRDB|MirMAP|MirSNP|Mirza-G|RepTar|RNAhybrid|TargetSpy
MSMO1	P11362		hsa-miR-1248	0.302288	11	High	CoMeTa|DIANA|ElMMo3|MBStar|MirAncesTar|miRDB|MirMAP|Mirza-G|RepTar|RNAhybrid|TargetSpy
FGFR1	Q92604		hsa-miR-1248	0.302021	11	High	BiTargeting|CoMeTa|DIANA|ElMMo3|MBStar|MirAncesTar|MirMAP|RepTar|RNA22|RNAhybrid|TargetSpy
LPGAT1	Q13283		hsa-miR-1248	0.301935	10	High	CoMeTa|DIANA|ElMMo3|MBStar|MirAncesTar|miRDB|MirMAP|MirTar|Mirza-G|RNAhybrid
G3BP1	P14210		hsa-miR-1248	0.301715	11	High	CoMeTa|DIANA|ElMMo3|MBStar|MirAncesTar|MirMAP|MirSNP|MirTar|Mirza-G|RNAhybrid|TargetSpy
HGF	O95429		hsa-miR-1248	0.301636	10	High	CoMeTa|DIANA|MBStar|MirAncesTar|miRDB|MirMAP|MirTar|Mirza-G|PACCMIT|RNAhybrid
BAG4	Q02446		hsa-miR-1248	0.30127	10	High	BiTargeting|Cupid|DIANA|ElMMo3|MirAncesTar|miRDB|MirMAP|MirSNP|Mirza-G|RepTar
SP4	Q9H9Z2		hsa-miR-1248	0.301157	10	High	CoMeTa|DIANA|ElMMo3|MirAncesTar|miRDB|MirMAP|MirSNP|MirTar|Mirza-G|TargetSpy
LI+A78:A284N28A	P98196		hsa-miR-1248	0.300026	11	High	CoMeTa|DIANA|ElMMo3|MBStar|MirAncesTar|miRDB|MirMAP|MirTar|Mirza-G|RNAhybrid|TargetSpy
ATP11A	Q8TE04		hsa-miR-1248	0.299989	10	High	DIANA|ElMMo3|MBStar|MirAncesTar|miRDB|MirMAP|MirTar|Mirza-G|RepTar|RNAhybrid
PANK1	O15105		hsa-miR-1248	0.299465	10	High	Cupid|DIANA|ElMMo3|MBStar|MirAncesTar|miRDB|MirMAP|Mirza-G|RNAhybrid|TargetSpy
SMAD7	Q01196		hsa-miR-1248	0.299371	11	High	CoMeTa|DIANA|ElMMo3|MBStar|MirAncesTar|miRDB|MirMAP|MirSNP|Mirza-G|RNAhybrid|TargetSpy
RUNX1	Q5BJF6		hsa-miR-1248	0.299337	10	High	DIANA|ElMMo3|MirAncesTar|miRDB|MirMAP|MirTar|Mirza-G|PACCMIT|RNAhybrid|TargetSpy
ODF2	Q9UJD0		hsa-miR-1248	0.298797	11	High	CoMeTa|DIANA|ElMMo3|MirAncesTar|miRDB|MirMAP|MirSNP|MirTar|RepTar|RNA22|RNAhybrid
RIMS3	Q96RK0		hsa-miR-1248	0.298607	10	High	BiTargeting|CoMeTa|DIANA|ElMMo3|MirAncesTar|miRDB|MirMAP|Mirza-G|PACCMIT|RNAhybrid
CIC	O14522		hsa-miR-1248	0.297851	10	High	CoMeTa|DIANA|ElMMo3|MBStar|MirAncesTar|miRDB|MirMAP|Mirza-G|RepTar|TargetSpy
PTPRT	D6RGH6		hsa-miR-1248	0.297686	10	High	DIANA|ElMMo3|MBStar|MirAncesTar|miRDB|MirMAP|MirSNP|MirTar|Mirza-G|RNAhybrid
MCIDAS	Q92903		hsa-miR-1248	0.29744	11	High	CoMeTa|DIANA|ElMMo3|MBStar|MirAncesTar|miRDB|MirMAP|MirSNP|MirTar|RepTar|RNAhybrid
CDS1	P11836		hsa-miR-1248	0.297438	11	High	CoMeTa|DIANA|ElMMo3|MBStar|MirAncesTar|miRDB|MirMAP|MirTar|Mirza-G|RepTar|RNAhybrid
MS4A1	P61962		hsa-miR-1248	0.297362	9	High	CoMeTa|DIANA|ElMMo3|MirAncesTar|miRDB|MirMAP|MirTar|RNAhybrid|TargetSpy
DCAF7	Q5T5M9		hsa-miR-1248	0.29717	10	High	CoMeTa|Cupid|DIANA|ElMMo3|MBStar|MirAncesTar|miRDB|MirMAP|Mirza-G|RNAhybrid
CCNJ	Q92698		hsa-miR-1248	0.297134	11	High	CoMeTa|DIANA|ElMMo3|MirAncesTar|miRDB|MirMAP|Mirza-G|PACCMIT|RNA22|RNAhybrid|TargetSpy
RAD54L	Q8IZF2		hsa-miR-1248	0.296995	11	High	DIANA|ElMMo3|MirAncesTar|miRDB|MirMAP|MirSNP|MirTar|Mirza-G|RepTar|RNAhybrid|TargetSpy
ADGRF5	Q9H329		hsa-miR-1248	0.296974	12	High	BiTargeting|CoMeTa|DIANA|ElMMo3|MBStar|MirAncesTar|miRDB|MirMAP|MirSNP|Mirza-G|RepTar|TargetSpy
EPB41L4B	Q9Y2V0		hsa-miR-1248	0.296843	10	High	DIANA|ElMMo3|MBStar|MirAncesTar|miRDB|MirMAP|MirTar|Mirza-G|RNAhybrid|TargetSpy
C15orf41	A8MV65		hsa-miR-1248	0.296837	12	High	CoMeTa|DIANA|ElMMo3|MBStar|MirAncesTar|miRDB|MirMAP|MirSNP|Mirza-G|RepTar|RNAhybrid|TargetSpy
VGLL3	Q9UKY1		hsa-miR-1248	0.296273	9	High	Cupid|DIANA|ElMMo3|MirAncesTar|miRDB|MirMAP|MirTar|Mirza-G|RNAhybrid
ZHX1	P29459		hsa-miR-1248	0.29563	11	High	CoMeTa|DIANA|ElMMo3|MBStar|MirAncesTar|miRDB|MirMAP|MirSNP|MirTar|Mirza-G|RNAhybrid
IL12A	Q96IY1		hsa-miR-1248	0.294537	9	High	CoMeTa|ElMMo3|MBStar|MirAncesTar|miRDB|MirMAP|RepTar|RNAhybrid|TargetSpy
NSL1	Q5TCZ1		hsa-miR-1248	0.294415	11	High	CoMeTa|DIANA|ElMMo3|MBStar|MirAncesTar|miRDB|MirMAP|Mirza-G|RepTar|RNAhybrid|TargetSpy
SH3PXD2A	Q07352		hsa-miR-1248	0.294229	7	High	CoMeTa|Cupid|DIANA|MBStar|MirAncesTar|MirMAP|RNAhybrid
ZFP36L1	O75940		hsa-miR-1248	0.29411	9	High	CoMeTa|DIANA|ElMMo3|MirAncesTar|miRDB|MirMAP|Mirza-G|RNAhybrid|TargetSpy
SMNDC1	Q01543		hsa-miR-1248	0.293854	10	High	CoMeTa|DIANA|ElMMo3|MBStar|MirAncesTar|miRDB|MirMAP|MirTar|Mirza-G|TargetSpy
FLI1	O60296		hsa-miR-1248	0.293648	10	High	CoMeTa|DIANA|ElMMo3|MBStar|MirAncesTar|miRDB|MirMAP|MirTar|Mirza-G|RNAhybrid
TRAK2	B3EWF7		hsa-miR-1248	0.293418	13	High	BiTargeting|DIANA|ElMMo3|MBStar|MirAncesTar|miRDB|MirMAP|MirSNP|MirTar|Mirza-G|RepTar|RNAhybrid|TargetSpy
EPM2A	Q9Y576		hsa-miR-1248	0.292399	11	High	DIANA|ElMMo3|MBStar|MirAncesTar|miRDB|MirMAP|MirTar|Mirza-G|RepTar|RNAhybrid|TargetSpy
ASB1	Q13886		hsa-miR-1248	0.291845	7	High	BiTargeting|CoMeTa|Cupid|MBStar|MirAncesTar|MirMAP|RepTar
KLF9	Q92186		hsa-miR-1248	0.291619	10	High	CoMeTa|DIANA|ElMMo3|MirAncesTar|miRDB|MirMAP|MirSNP|Mirza-G|PACCMIT|RepTar
ST8SIA2	O00712		hsa-miR-1248	0.291562	8	High	CoMeTa|Cupid|DIANA|MBStar|MirAncesTar|MirMAP|Mirza-G|RNAhybrid
NFIB	O94823		hsa-miR-1248	0.291299	12	High	CoMeTa|DIANA|ElMMo3|MBStar|MirAncesTar|miRDB|MirMAP|MirSNP|Mirza-G|RepTar|RNAhybrid|TargetSpy
ATP10B	P42830		hsa-miR-1248	0.291227	9	High	CoMeTa|DIANA|ElMMo3|MBStar|MirAncesTar|miRDB|MirMAP|Mirza-G|RepTar
CXCL5	O43707		hsa-miR-1248	0.290823	9	High	CoMeTa|DIANA|ElMMo3|MirAncesTar|miRDB|MirMAP|PACCMIT|RepTar|RNAhybrid
ACTN4	Q9UKI8		hsa-miR-1248	0.290589	9	High	CoMeTa|DIANA|ElMMo3|MBStar|MirAncesTar|MirMAP|RepTar|RNAhybrid|TargetSpy
TLK1	O43809		hsa-miR-1248	0.29035	10	High	CoMeTa|DIANA|ElMMo3|MirAncesTar|miRDB|MirMAP|MirSNP|Mirza-G|RepTar|TargetSpy
NUDT21	Q9NQZ5		hsa-miR-1248	0.290344	11	High	CoMeTa|DIANA|ElMMo3|MBStar|MirAncesTar|miRDB|MirMAP|Mirza-G|RepTar|RNAhybrid|TargetSpy
STARD7	Q6PIL6		hsa-miR-1248	0.290276	12	High	CoMeTa|DIANA|ElMMo3|MBStar|MirAncesTar|miRDB|MirMAP|MirSNP|Mirza-G|RepTar|RNAhybrid|TargetSpy
KCNIP4	Q02156		hsa-miR-1248	0.290256	11	High	DIANA|ElMMo3|MBStar|MirAncesTar|miRDB|MirMAP|MirTar|Mirza-G|RepTar|RNAhybrid|TargetSpy
PRKCE	P51991		hsa-miR-1248	0.290073	7	High	CoMeTa|Cupid|DIANA|MBStar|MirAncesTar|MirMAP|RNAhybrid
HNRNPA3	Q9UBX8		hsa-miR-1248	0.289867	12	High	CoMeTa|DIANA|ElMMo3|MBStar|MirAncesTar|miRDB|MirMAP|MirTar|Mirza-G|RepTar|RNAhybrid|TargetSpy
B4GALT6	P22033		hsa-miR-1248	0.289699	9	High	CoMeTa|DIANA|ElMMo3|MBStar|MirAncesTar|miRDB|MirMAP|MirTar|Mirza-G
MUT	Q96SI1		hsa-miR-1248	0.289399	10	High	DIANA|ElMMo3|MBStar|MirAncesTar|miRDB|MirMAP|MirTar|Mirza-G|RNAhybrid|TargetSpy
KCTD15	Q9ULY5		hsa-miR-1248	0.289121	10	High	CoMeTa|DIANA|ElMMo3|MirAncesTar|miRDB|MirMAP|MirSNP|MirTar|RNAhybrid|TargetSpy
CLEC4E	Q6PJG2		hsa-miR-1248	0.289118	10	High	CoMeTa|DIANA|ElMMo3|MBStar|MirAncesTar|miRDB|MirMAP|PACCMIT|RepTar|RNAhybrid
ELMSAN1	Q01518		hsa-miR-1248	0.2891	7	High	BiTargeting|CoMeTa|Cupid|MirAncesTar|PACCMIT|RNA22|RNAhybrid
CAP1	Q92879		hsa-miR-1248	0.289003	10	High	BiTargeting|CoMeTa|DIANA|ElMMo3|MBStar|MirAncesTar|miRDB|MirMAP|Mirza-G|RNAhybrid
CELF1	Q9H8N7		hsa-miR-1248	0.288736	12	High	BiTargeting|CoMeTa|DIANA|ElMMo3|MBStar|MirAncesTar|miRDB|MirMAP|Mirza-G|RepTar|RNAhybrid|TargetSpy
ZNF395	O75845		hsa-miR-1248	0.288388	10	High	CoMeTa|DIANA|ElMMo3|MBStar|MirAncesTar|miRDB|MirMAP|MirTar|RNAhybrid|TargetSpy
SC5D	Q8WWZ3		hsa-miR-1248	0.288159	13	High	BiTargeting|DIANA|ElMMo3|MBStar|MirAncesTar|miRDB|MirMAP|MirSNP|MirTar|Mirza-G|RepTar|RNA22|RNAhybrid
EDARADD	Q9NZV8		hsa-miR-1248	0.287041	10	High	CoMeTa|DIANA|ElMMo3|MBStar|MirAncesTar|miRDB|MirMAP|Mirza-G|PACCMIT|TargetSpy
KCND2	Q9H098		hsa-miR-1248	0.286943	12	High	BiTargeting|DIANA|ElMMo3|MBStar|MirAncesTar|miRDB|MirMAP|MirSNP|Mirza-G|RepTar|RNAhybrid|TargetSpy
FAM107B	Q13467		hsa-miR-1248	0.286493	10	High	CoMeTa|DIANA|ElMMo3|MBStar|MirAncesTar|miRDB|MirMAP|MirTar|PACCMIT|TargetSpy
FZD5	Q4KWH8		hsa-miR-1248	0.286435	12	High	CoMeTa|DIANA|ElMMo3|MBStar|MirAncesTar|miRDB|MirMAP|MirSNP|Mirza-G|RepTar|RNAhybrid|TargetSpy
PLCH1	Q96MW1		hsa-miR-1248	0.286365	9	High	Cupid|DIANA|ElMMo3|MBStar|MirAncesTar|miRDB|MirMAP|MirTar|RNAhybrid
CCDC43	Q13627		hsa-miR-1248	0.286205	6	High	CoMeTa|Cupid|DIANA|MBStar|MirAncesTar|RNAhybrid
DYRK1A	Q8N6S4		hsa-miR-1248	0.286014	10	High	Cupid|DIANA|ElMMo3|MBStar|MirAncesTar|miRDB|MirMAP|MirTar|Mirza-G|RNAhybrid
ANKRD13C	Q6IQ55		hsa-miR-1248	0.28599	11	High	BiTargeting|CoMeTa|DIANA|ElMMo3|MBStar|MirAncesTar|miRDB|MirMAP|Mirza-G|RepTar|RNAhybrid
TTBK2	Q9BXB1		hsa-miR-1248	0.285705	12	High	BiTargeting|CoMeTa|DIANA|ElMMo3|MBStar|MirAncesTar|miRDB|MirMAP|MirSNP|Mirza-G|RNAhybrid|TargetSpy
LGR4	P04839		hsa-miR-1248	0.285584	10	High	CoMeTa|DIANA|ElMMo3|MirAncesTar|miRDB|MirMAP|MirSNP|MirTar|Mirza-G|TargetSpy
CYBB	Q8TAL6		hsa-miR-1248	0.285331	11	High	DIANA|ElMMo3|MBStar|MirAncesTar|miRDB|MirMAP|MirSNP|MirTar|Mirza-G|RepTar|TargetSpy
FIBIN	Q16718		hsa-miR-1248	0.285076	10	High	BiTargeting|CoMeTa|DIANA|ElMMo3|MBStar|MirAncesTar|miRDB|MirMAP|Mirza-G|RNAhybrid
NDUFA5	P01213		hsa-miR-1248	0.284864	10	High	CoMeTa|DIANA|ElMMo3|MirAncesTar|miRDB|MirMAP|MirTar|Mirza-G|RepTar|RNAhybrid
PDYN	Q9BS26		hsa-miR-1248	0.284693	11	High	DIANA|ElMMo3|MBStar|MirAncesTar|miRDB|MirMAP|MirSNP|MirTar|Mirza-G|RepTar|TargetSpy
ERP44	Q6VAB6		hsa-miR-1248	0.284497	11	High	BiTargeting|DIANA|ElMMo3|MBStar|MirAncesTar|miRDB|MirMAP|MirSNP|Mirza-G|RepTar|TargetSpy
KSR2	Q7Z3C6		hsa-miR-1248	0.284424	10	High	BiTargeting|CoMeTa|DIANA|ElMMo3|MirAncesTar|miRDB|MirMAP|MirTar|Mirza-G|RNAhybrid
ATG9A	P20700		hsa-miR-1248	0.284115	10	High	CoMeTa|DIANA|ElMMo3|MirAncesTar|miRDB|MirMAP|MirSNP|Mirza-G|RNAhybrid|TargetSpy
LMNB1	Q8NCT3		hsa-miR-1248	0.283832	12	High	CoMeTa|DIANA|ElMMo3|MBStar|MirAncesTar|miRDB|MirMAP|MirSNP|Mirza-G|RepTar|RNAhybrid|TargetSpy
KIAA0895	Q5SWX8		hsa-miR-1248	0.283763	8	High	CoMeTa|DIANA|ElMMo3|MirAncesTar|miRDB|MirMAP|MirTar|RNAhybrid
C1orf27	Q8IXS8		hsa-miR-1248	0.283704	10	High	BiTargeting|DIANA|ElMMo3|MirAncesTar|miRDB|MirMAP|Mirza-G|PACCMIT|RepTar|TargetSpy
FAM126B	Q9UM44		hsa-miR-1248	0.283304	11	High	DIANA|ElMMo3|MBStar|MirAncesTar|miRDB|MirMAP|MirSNP|MirTar|Mirza-G|RNAhybrid|TargetSpy
HHLA2	Q92540		hsa-miR-1248	0.28328	8	High	CoMeTa|Cupid|DIANA|MBStar|MirAncesTar|MirMAP|RNA22|RNAhybrid
SMG7	P37840		hsa-miR-1248	0.283052	11	High	CoMeTa|DIANA|ElMMo3|MBStar|MirAncesTar|miRDB|MirMAP|Mirza-G|RepTar|RNAhybrid|TargetSpy
SNCA	P43115		hsa-miR-1248	0.282983	11	High	CoMeTa|DIANA|ElMMo3|MBStar|MirAncesTar|miRDB|MirMAP|Mirza-G|RNA22|RNAhybrid|TargetSpy
PTGER3	Q9P203		hsa-miR-1248	0.281834	11	High	BiTargeting|CoMeTa|DIANA|ElMMo3|MBStar|MirAncesTar|miRDB|MirMAP|Mirza-G|RepTar|RNAhybrid
BTBD7	Q9UHR5		hsa-miR-1248	0.281737	11	High	BiTargeting|Cupid|DIANA|ElMMo3|MBStar|MirAncesTar|miRDB|MirMAP|Mirza-G|RepTar|RNAhybrid
SAP30BP	Q8WTS6		hsa-miR-1248	0.281693	11	High	DIANA|ElMMo3|MBStar|MirAncesTar|miRDB|MirMAP|MirTar|Mirza-G|RepTar|RNAhybrid|TargetSpy
SETD7	Q9BZ29		hsa-miR-1248	0.281532	9	High	BiTargeting|CoMeTa|ElMMo3|MBStar|MirAncesTar|MirMAP|Mirza-G|PACCMIT|RNAhybrid
DOCK9	O43795		hsa-miR-1248	0.281514	11	High	BiTargeting|DIANA|ElMMo3|MBStar|MirAncesTar|miRDB|MirMAP|MirTar|Mirza-G|RepTar|RNAhybrid
MYO1B	P22694		hsa-miR-1248	0.281497	11	High	BiTargeting|CoMeTa|ElMMo3|MBStar|MirAncesTar|miRDB|MirMAP|Mirza-G|RepTar|RNAhybrid|TargetSpy
PRKACB	P12111		hsa-miR-1248	0.281448	11	High	CoMeTa|DIANA|ElMMo3|MBStar|MirAncesTar|miRDB|MirMAP|Mirza-G|RepTar|RNAhybrid|TargetSpy
COL6A3	P56557		hsa-miR-1248	0.281354	10	High	CoMeTa|DIANA|ElMMo3|MirAncesTar|miRDB|MirMAP|MirSNP|MirTar|RNAhybrid|TargetSpy
TMEM50B	Q9Y483		hsa-miR-1248	0.279999	11	High	BiTargeting|Cupid|ElMMo3|MBStar|MirAncesTar|miRDB|MirMAP|Mirza-G|RNA22|RNAhybrid|TargetSpy
MTF2	Q7Z3B3		hsa-miR-1248	0.27977	10	High	DIANA|ElMMo3|MBStar|MirAncesTar|miRDB|MirMAP|MirSNP|MirTar|RNAhybrid|TargetSpy
KANSL1	Q9BYP7		hsa-miR-1248	0.27965	9	High	DIANA|ElMMo3|MBStar|MirAncesTar|miRDB|MirMAP|MirTar|Mirza-G|RepTar
WNK3	Q9P0L0		hsa-miR-1248	0.279144	11	High	CoMeTa|DIANA|ElMMo3|MBStar|MirAncesTar|miRDB|MirMAP|MirSNP|Mirza-G|RNAhybrid|TargetSpy
VAPA	Q8IZP0		hsa-miR-1248	0.279133	10	High	CoMeTa|DIANA|ElMMo3|MBStar|MirAncesTar|miRDB|MirMAP|Mirza-G|RNAhybrid|TargetSpy
ABI1	Q8NE31		hsa-miR-1248	0.278917	12	High	BiTargeting|DIANA|ElMMo3|MBStar|MirAncesTar|miRDB|MirMAP|MirTar|Mirza-G|RepTar|RNAhybrid|TargetSpy
FAM13C	Q9UBS8		hsa-miR-1248	0.278718	10	High	CoMeTa|DIANA|ElMMo3|MBStar|MirAncesTar|miRDB|MirMAP|Mirza-G|RNAhybrid|TargetSpy
RNF14	Q9UGH3		hsa-miR-1248	0.278592	10	High	CoMeTa|DIANA|ElMMo3|MBStar|MirAncesTar|miRDB|MirMAP|MirSNP|PACCMIT|TargetSpy
SLC23A2	Q8TDY4		hsa-miR-1248	0.278492	12	High	CoMeTa|DIANA|ElMMo3|MBStar|MirAncesTar|miRDB|MirMAP|MirTar|Mirza-G|RNA22|RNAhybrid|TargetSpy
ASAP3	Q96P16		hsa-miR-1248	0.27807	11	High	CoMeTa|DIANA|ElMMo3|MBStar|MirAncesTar|miRDB|MirMAP|Mirza-G|RepTar|RNAhybrid|TargetSpy
RPRD1A	P33947		hsa-miR-1248	0.277934	9	High	CoMeTa|DIANA|ElMMo3|MirAncesTar|miRDB|MirMAP|Mirza-G|RepTar|RNAhybrid
KDELR2	Q8TDH9		hsa-miR-1248	0.277419	10	High	Cupid|DIANA|ElMMo3|MBStar|MirAncesTar|miRDB|MirMAP|MirSNP|Mirza-G|TargetSpy
BLOC1S5	Q8NEY1		hsa-miR-1248	0.277072	11	High	BiTargeting|CoMeTa|DIANA|ElMMo3|MBStar|MirAncesTar|miRDB|MirMAP|Mirza-G|RepTar|RNA22
NAV1	O95936		hsa-miR-1248	0.277048	9	High	Cupid|DIANA|ElMMo3|MirAncesTar|miRDB|MirMAP|Mirza-G|RepTar|RNAhybrid
EOMES	Q9H2D6		hsa-miR-1248	0.277005	8	High	CoMeTa|DIANA|ElMMo3|MBStar|MirAncesTar|MirMAP|PACCMIT|RNAhybrid
TRIOBP	Q92772		hsa-miR-1248	0.276091	10	High	CoMeTa|DIANA|ElMMo3|MirAncesTar|miRDB|MirMAP|Mirza-G|RepTar|RNAhybrid|TargetSpy
CDKL2	Q9UBT6		hsa-miR-1248	0.275899	9	High	DIANA|ElMMo3|MirAncesTar|MirMAP|MirSNP|MirTar|Mirza-G|RNAhybrid|TargetSpy
POLK	Q99801		hsa-miR-1248	0.27581	10	High	CoMeTa|DIANA|ElMMo3|MBStar|MirAncesTar|miRDB|MirMAP|MirSNP|RepTar|RNAhybrid
NKX3-1	Q9Y2G8		hsa-miR-1248	0.275754	12	High	CoMeTa|DIANA|ElMMo3|MBStar|MirAncesTar|miRDB|MirMAP|MirSNP|Mirza-G|RNA22|RNAhybrid|TargetSpy
DNAJC16	Q92750		hsa-miR-1248	0.2756	11	High	BiTargeting|CoMeTa|DIANA|ElMMo3|MBStar|MirAncesTar|miRDB|MirMAP|Mirza-G|RNAhybrid|TargetSpy
TAF4B	Q02246		hsa-miR-1248	0.274894	11	High	CoMeTa|DIANA|ElMMo3|MBStar|MirAncesTar|miRDB|MirMAP|MirSNP|RNA22|RNAhybrid|TargetSpy
CNTN2	Q12765		hsa-miR-1248	0.274533	10	High	CoMeTa|DIANA|ElMMo3|MBStar|MirAncesTar|miRDB|MirMAP|RepTar|RNAhybrid|TargetSpy
SCRN1	P12107		hsa-miR-1248	0.274306	12	High	BiTargeting|CoMeTa|DIANA|ElMMo3|MBStar|MirAncesTar|miRDB|MirMAP|RepTar|RNA22|RNAhybrid|TargetSpy
COL11A1	Q9BZA7		hsa-miR-1248	0.274304	11	High	CoMeTa|DIANA|ElMMo3|MBStar|MirAncesTar|miRDB|MirMAP|Mirza-G|RepTar|RNAhybrid|TargetSpy
PCDH11X	O43184		hsa-miR-1248	0.274069	12	High	BiTargeting|CoMeTa|DIANA|ElMMo3|MBStar|MirAncesTar|MirMAP|MirSNP|Mirza-G|RepTar|RNAhybrid|TargetSpy
ADAM12	Q9BW91		hsa-miR-1248	0.274019	11	High	CoMeTa|DIANA|ElMMo3|MBStar|MirAncesTar|miRDB|MirMAP|MirSNP|RepTar|RNAhybrid|TargetSpy
NUDT9	Q9BXY4		hsa-miR-1248	0.273696	9	High	Cupid|DIANA|ElMMo3|MirAncesTar|miRDB|MirMAP|Mirza-G|RNAhybrid|TargetSpy
RSPO3	Q12797		hsa-miR-1248	0.273621	10	High	BiTargeting|CoMeTa|ElMMo3|MBStar|MirAncesTar|MirMAP|MirSNP|Mirza-G|RNAhybrid|TargetSpy
ASPH	Q9UPU9		hsa-miR-1248	0.272528	10	High	CoMeTa|DIANA|ElMMo3|MBStar|MirAncesTar|miRDB|MirMAP|MirSNP|Mirza-G|RNAhybrid
SAMD4A	Q92643		hsa-miR-1248	0.27201	10	High	CoMeTa|DIANA|ElMMo3|MirAncesTar|miRDB|MirMAP|MirTar|RepTar|RNAhybrid|TargetSpy
PIGK	P28335		hsa-miR-1248	0.271813	12	High	BiTargeting|CoMeTa|DIANA|ElMMo3|MBStar|MirAncesTar|miRDB|MirMAP|Mirza-G|RepTar|RNAhybrid|TargetSpy
HTR2C	O43602		hsa-miR-1248	0.271704	10	High	CoMeTa|DIANA|ElMMo3|MBStar|MirAncesTar|miRDB|MirMAP|RepTar|RNAhybrid|TargetSpy
DCX	P21128		hsa-miR-1248	0.271628	9	High	CoMeTa|DIANA|ElMMo3|MirAncesTar|miRDB|MirMAP|Mirza-G|RNAhybrid|TargetSpy
ENDOU	Q99985		hsa-miR-1248	0.271573	10	High	DIANA|ElMMo3|MBStar|MirAncesTar|miRDB|MirMAP|MirSNP|MirTar|Mirza-G|RNAhybrid
SEMA3C	Q8N6S5		hsa-miR-1248	0.271549	10	High	Cupid|DIANA|ElMMo3|MirAncesTar|miRDB|MirMAP|MirSNP|Mirza-G|RNAhybrid|TargetSpy
ARL6IP6	P04818		hsa-miR-1248	0.271528	11	High	DIANA|ElMMo3|MirAncesTar|miRDB|MirMAP|MirSNP|MirTar|Mirza-G|RepTar|RNAhybrid|TargetSpy
TYMS	Q86TA1		hsa-miR-1248	0.271301	10	High	CoMeTa|DIANA|ElMMo3|MirAncesTar|miRDB|MirMAP|MirSNP|Mirza-G|RepTar|TargetSpy
MOB3B	Q9NX20		hsa-miR-1248	0.270963	10	High	CoMeTa|DIANA|ElMMo3|MirAncesTar|miRDB|MirMAP|MirTar|RepTar|RNAhybrid|TargetSpy
MRPL16	O75129		hsa-miR-1248	0.270848	10	High	DIANA|ElMMo3|MBStar|MirAncesTar|miRDB|MirMAP|MirSNP|Mirza-G|RepTar|RNAhybrid
ASTN2	Q5DX21		hsa-miR-1248	0.270683	12	High	BiTargeting|DIANA|ElMMo3|MBStar|MirAncesTar|miRDB|MirMAP|MirSNP|Mirza-G|RepTar|RNAhybrid|TargetSpy
IGSF11	Q8NB14		hsa-miR-1248	0.270661	9	High	Cupid|DIANA|ElMMo3|MBStar|MirAncesTar|miRDB|MirMAP|Mirza-G|RNAhybrid
USP38	Q12857		hsa-miR-1248	0.270598	11	High	BiTargeting|Cupid|DIANA|ElMMo3|MBStar|MirAncesTar|miRDB|MirMAP|Mirza-G|RNA22|RNAhybrid
NFIA	Q99643		hsa-miR-1248	0.270305	11	High	CoMeTa|ElMMo3|MBStar|MirAncesTar|miRDB|MirSNP|MirTar|Mirza-G|RNA22|RNAhybrid|TargetSpy
SDHC	Q6ZXV5		hsa-miR-1248	0.270305	9	High	Cupid|DIANA|ElMMo3|MirAncesTar|miRDB|MirMAP|Mirza-G|RNAhybrid|TargetSpy
TMTC3	Q9NR50		hsa-miR-1248	0.270254	13	High	BiTargeting|CoMeTa|DIANA|ElMMo3|MBStar|MirAncesTar|miRDB|MirMAP|MirTar|Mirza-G|RNA22|RNAhybrid|TargetSpy
EIF2B3	Q86VN1		hsa-miR-1248	0.270204	9	High	DIANA|ElMMo3|MirAncesTar|miRDB|MirMAP|MirSNP|MirTar|Mirza-G|TargetSpy
VPS36	Q8N2Q7		hsa-miR-1248	0.270165	8	High	CoMeTa|Cupid|DIANA|MBStar|MirAncesTar|MirMAP|Mirza-G|RNAhybrid
NLGN1	Q8NCC3		hsa-miR-1248	0.269829	9	High	CoMeTa|DIANA|ElMMo3|MirAncesTar|miRDB|MirMAP|PACCMIT|RepTar|RNAhybrid
PLA2G15	P31483		hsa-miR-1248	0.269564	8	High	CoMeTa|DIANA|ElMMo3|MBStar|MirAncesTar|MirMAP|RNAhybrid|TargetSpy
TIA1	Q01718		hsa-miR-1248	0.269467	11	High	DIANA|ElMMo3|MBStar|MirAncesTar|miRDB|MirMAP|MirSNP|MirTar|Mirza-G|RepTar|TargetSpy
MC2R	Q9P2K6		hsa-miR-1248	0.269341	11	High	DIANA|ElMMo3|MBStar|MirAncesTar|miRDB|MirMAP|MirTar|Mirza-G|RepTar|RNAhybrid|TargetSpy
KLHL42	P43004		hsa-miR-1248	0.269244	10	High	CoMeTa|DIANA|ElMMo3|MBStar|MirAncesTar|miRDB|MirMAP|RepTar|RNAhybrid|TargetSpy
SLC1A2	Q9Y233		hsa-miR-1248	0.269126	10	High	CoMeTa|DIANA|ElMMo3|MBStar|MirAncesTar|miRDB|MirMAP|Mirza-G|RepTar|RNAhybrid
PDE10A	P42772		hsa-miR-1248	0.268834	11	High	CoMeTa|DIANA|ElMMo3|MBStar|MirAncesTar|miRDB|MirMAP|Mirza-G|RepTar|RNAhybrid|TargetSpy
CDKN2B	Q03164		hsa-miR-1248	0.268816	10	High	BiTargeting|CoMeTa|DIANA|ElMMo3|MBStar|MirAncesTar|miRDB|MirMAP|PACCMIT|RNAhybrid
KMT2A	P42568		hsa-miR-1248	0.268794	8	High	Cupid|DIANA|MBStar|MirAncesTar|miRDB|MirMAP|Mirza-G|RNAhybrid
MLLT3	Q9Y2F9		hsa-miR-1248	0.268475	10	High	CoMeTa|DIANA|ElMMo3|MBStar|MirAncesTar|miRDB|MirMAP|Mirza-G|RNAhybrid|TargetSpy
BTBD3	P23769		hsa-miR-1248	0.26847	10	High	BiTargeting|CoMeTa|Cupid|DIANA|MBStar|MirAncesTar|MirMAP|Mirza-G|RepTar|RNAhybrid
GATA2	P10243		hsa-miR-1248	0.26846	6	High	CoMeTa|Cupid|MBStar|MirAncesTar|MirMAP|RepTar
MYBL1	O43169		hsa-miR-1248	0.268385	10	High	CoMeTa|DIANA|ElMMo3|MBStar|MirAncesTar|miRDB|MirMAP|Mirza-G|RepTar|RNAhybrid
CYB5B	P05019		hsa-miR-1248	0.268375	10	High	CoMeTa|DIANA|ElMMo3|MBStar|MirAncesTar|miRDB|MirMAP|RepTar|RNAhybrid|TargetSpy
IGF1	P16112		hsa-miR-1248	0.268286	8	High	CoMeTa|MBStar|MirAncesTar|miRDB|MirMAP|MirTar|Mirza-G|RNAhybrid
ACAN	P51825		hsa-miR-1248	0.2682	9	High	CoMeTa|DIANA|ElMMo3|MBStar|MirAncesTar|miRDB|MirMAP|Mirza-G|TargetSpy
AFF1	Q7Z4R8		hsa-miR-1248	0.267591	8	High	CoMeTa|DIANA|ElMMo3|MirAncesTar|miRDB|MirMAP|Mirza-G|PACCMIT
C6orf120	Q7Z3S9		hsa-miR-1248	0.26748	11	High	BiTargeting|CoMeTa|DIANA|ElMMo3|MBStar|MirAncesTar|miRDB|MirMAP|Mirza-G|RNA22|RNAhybrid
NOTCH2NL	Q15286		hsa-miR-1248	0.267424	10	High	CoMeTa|DIANA|ElMMo3|MirAncesTar|miRDB|MirMAP|Mirza-G|PACCMIT|RepTar|RNAhybrid
RAB35	P22413		hsa-miR-1248	0.267165	11	High	CoMeTa|DIANA|ElMMo3|MBStar|MirAncesTar|miRDB|MirMAP|MirSNP|Mirza-G|RNAhybrid|TargetSpy
ENPP1	O43865		hsa-miR-1248	0.267055	10	High	CoMeTa|DIANA|ElMMo3|MirAncesTar|miRDB|MirMAP|Mirza-G|RNA22|RNAhybrid|TargetSpy
AHCYL1	P01374		hsa-miR-1248	0.266857	11	High	BiTargeting|CoMeTa|DIANA|ElMMo3|MBStar|MirAncesTar|miRDB|MirMAP|Mirza-G|RepTar|RNAhybrid
LTA	O95402		hsa-miR-1248	0.266805	10	High	Cupid|DIANA|ElMMo3|MirAncesTar|miRDB|MirMAP|Mirza-G|PACCMIT|RNAhybrid|TargetSpy
MED26	Q92629		hsa-miR-1248	0.266566	12	High	BiTargeting|CoMeTa|DIANA|ElMMo3|MBStar|MirAncesTar|miRDB|MirMAP|Mirza-G|RepTar|RNAhybrid|TargetSpy
SGCD	Q8WXI9		hsa-miR-1248	0.26648	10	High	Cupid|DIANA|ElMMo3|MBStar|MirAncesTar|miRDB|MirMAP|Mirza-G|RNA22|RNAhybrid
GATAD2B	Q9Y4X0		hsa-miR-1248	0.266415	8	High	CoMeTa|DIANA|ElMMo3|MBStar|MirAncesTar|MirMAP|RepTar|TargetSpy
AMMECR1	Q8IXB1		hsa-miR-1248	0.26634	13	High	BiTargeting|DIANA|ElMMo3|MBStar|MirAncesTar|miRDB|MirMAP|MirSNP|MirTar|Mirza-G|RepTar|RNAhybrid|TargetSpy
DNAJC10	P21283		hsa-miR-1248	0.266274	8	High	CoMeTa|DIANA|ElMMo3|MBStar|MirAncesTar|MirMAP|RepTar|RNAhybrid
ATP6V1C1	Q9H246		hsa-miR-1248	0.266223	10	High	CoMeTa|DIANA|ElMMo3|MBStar|MirAncesTar|miRDB|MirMAP|MirTar|RepTar|RNA22
C1orf21	Q9UGM6		hsa-miR-1248	0.26574	11	High	CoMeTa|DIANA|ElMMo3|MirAncesTar|miRDB|MirMAP|MirSNP|Mirza-G|RNA22|RNAhybrid|TargetSpy
WARS2	P06401		hsa-miR-1248	0.265728	11	High	DIANA|ElMMo3|MBStar|MirAncesTar|miRDB|MirMAP|MirSNP|Mirza-G|RepTar|RNAhybrid|TargetSpy
PGR	Q8IWI9		hsa-miR-1248	0.265222	10	High	CoMeTa|Cupid|DIANA|ElMMo3|MBStar|MirAncesTar|miRDB|MirMAP|Mirza-G|RNAhybrid
MGA	Q8WX93		hsa-miR-1248	0.264954	10	High	CoMeTa|DIANA|ElMMo3|MBStar|MirAncesTar|miRDB|MirMAP|Mirza-G|RNAhybrid|TargetSpy
PALLD	Q9UPP1		hsa-miR-1248	0.264868	10	High	CoMeTa|DIANA|ElMMo3|MBStar|MirAncesTar|MirMAP|Mirza-G|PACCMIT|RepTar|RNAhybrid
PHF8	Q15777		hsa-miR-1248	0.264615	10	High	BiTargeting|DIANA|ElMMo3|MBStar|MirAncesTar|miRDB|MirMAP|MirTar|Mirza-G|RNAhybrid
MPPED2	O95628		hsa-miR-1248	0.264086	8	High	CoMeTa|Cupid|DIANA|MBStar|MirAncesTar|MirMAP|Mirza-G|RNAhybrid
CNOT4	Q96AJ1		hsa-miR-1248	0.264049	12	High	BiTargeting|DIANA|ElMMo3|MBStar|MirAncesTar|miRDB|MirMAP|MirTar|Mirza-G|RepTar|RNAhybrid|TargetSpy
CLUAP1	Q9UL17		hsa-miR-1248	0.263719	8	High	CoMeTa|DIANA|ElMMo3|MirAncesTar|miRDB|MirMAP|PACCMIT|RepTar
TBX21	Q9NX94		hsa-miR-1248	0.2635	9	High	CoMeTa|DIANA|ElMMo3|MBStar|MirAncesTar|miRDB|MirMAP|MirSNP|Mirza-G
WBP1L	Q14108		hsa-miR-1248	0.263172	8	High	CoMeTa|DIANA|ElMMo3|MirAncesTar|miRDB|MirMAP|MirTar|RNAhybrid
SCARB2	Q9H2X6		hsa-miR-1248	0.262636	11	High	BiTargeting|DIANA|ElMMo3|MBStar|MirAncesTar|miRDB|MirMAP|MirSNP|MirTar|Mirza-G|RNAhybrid
HIPK2	P35579		hsa-miR-1248	0.262475	8	High	CoMeTa|DIANA|ElMMo3|MirAncesTar|miRDB|MirMAP|Mirza-G|RNAhybrid
MYH9	Q9NVU0		hsa-miR-1248	0.262363	9	High	CoMeTa|DIANA|ElMMo3|MBStar|MirAncesTar|miRDB|MirMAP|RNAhybrid|TargetSpy
POLR3E	Q15121		hsa-miR-1248	0.26199	10	High	CoMeTa|DIANA|ElMMo3|MirAncesTar|miRDB|MirMAP|Mirza-G|RepTar|RNA22|RNAhybrid
PEA15	Q9Y316		hsa-miR-1248	0.261981	6	High	CoMeTa|Cupid|MBStar|MirAncesTar|RepTar|RNAhybrid
MEMO1	Q8TDR2		hsa-miR-1248	0.261973	11	High	BiTargeting|DIANA|ElMMo3|MBStar|MirAncesTar|miRDB|MirMAP|MirSNP|Mirza-G|RepTar|TargetSpy
STK35	Q15717		hsa-miR-1248	0.261767	9	High	CoMeTa|DIANA|ElMMo3|MBStar|MirAncesTar|MirMAP|RepTar|RNAhybrid|TargetSpy
ELAVL1	Q92581		hsa-miR-1248	0.261723	9	High	CoMeTa|DIANA|ElMMo3|MBStar|MirAncesTar|miRDB|MirMAP|Mirza-G|TargetSpy
SLC9A6	Q14739		hsa-miR-1248	0.261338	10	High	CoMeTa|ElMMo3|MBStar|MirAncesTar|miRDB|MirMAP|MirTar|Mirza-G|RNA22|RNAhybrid
LBR	Q6GQQ9		hsa-miR-1248	0.261087	11	High	BiTargeting|CoMeTa|DIANA|ElMMo3|MBStar|MirAncesTar|miRDB|MirMAP|Mirza-G|RepTar|RNA22
OTUD7B	Q8TAA1		hsa-miR-1248	0.260892	9	High	BiTargeting|DIANA|ElMMo3|MirAncesTar|miRDB|MirMAP|PACCMIT|RepTar|RNAhybrid
RNASE11	Q16552		hsa-miR-1248	0.260892	11	High	CoMeTa|DIANA|ElMMo3|MBStar|MirAncesTar|miRDB|MirMAP|MirSNP|Mirza-G|RNAhybrid|TargetSpy
IL17A	Q9ULH7		hsa-miR-1248	0.260754	9	High	BiTargeting|CoMeTa|DIANA|ElMMo3|MBStar|MirAncesTar|MirMAP|RepTar|RNAhybrid
MKL2	P41180		hsa-miR-1248	0.260373	9	High	CoMeTa|DIANA|ElMMo3|MBStar|MirAncesTar|miRDB|MirMAP|MirTar|RNAhybrid
CASR	A6NIH7		hsa-miR-1248	0.26005	9	High	CoMeTa|DIANA|ElMMo3|MirAncesTar|miRDB|MirMAP|Mirza-G|RepTar|TargetSpy
UNC119B	O75444		hsa-miR-1248	0.259903	10	High	CoMeTa|DIANA|ElMMo3|MBStar|MirAncesTar|miRDB|MirMAP|Mirza-G|RepTar|RNAhybrid
MAF	Q8TF74		hsa-miR-1248	0.259873	9	High	CoMeTa|DIANA|ElMMo3|MirAncesTar|miRDB|MirMAP|PACCMIT|RNAhybrid|TargetSpy
WIPF2	Q99487		hsa-miR-1248	0.259872	11	High	CoMeTa|DIANA|ElMMo3|MBStar|MirAncesTar|miRDB|MirMAP|MirTar|Mirza-G|RNA22|RNAhybrid
PAFAH2	Q7Z2W4		hsa-miR-1248	0.259766	10	High	CoMeTa|DIANA|ElMMo3|MBStar|MirAncesTar|miRDB|MirMAP|Mirza-G|RNAhybrid|TargetSpy
ZC3HAV1	P24723		hsa-miR-1248	0.259739	10	High	CoMeTa|DIANA|ElMMo3|MirAncesTar|miRDB|MirMAP|Mirza-G|RepTar|RNAhybrid|TargetSpy
PRKCH	Q9BZZ2		hsa-miR-1248	0.259697	10	High	CoMeTa|DIANA|ElMMo3|MBStar|MirAncesTar|miRDB|MirMAP|Mirza-G|RNAhybrid|TargetSpy
SIGLEC1	Q75T13		hsa-miR-1248	0.259668	11	High	CoMeTa|DIANA|ElMMo3|MBStar|MirAncesTar|miRDB|MirMAP|Mirza-G|RepTar|RNAhybrid|TargetSpy
PGAP1	Q92786		hsa-miR-1248	0.259551	11	High	CoMeTa|DIANA|ElMMo3|MBStar|MirAncesTar|miRDB|MirMAP|Mirza-G|RNA22|RNAhybrid|TargetSpy
PROX1	Q9ULI3		hsa-miR-1248	0.25951	10	High	CoMeTa|DIANA|ElMMo3|MBStar|MirAncesTar|miRDB|MirMAP|Mirza-G|RepTar|RNAhybrid
HEG1	O14983		hsa-miR-1248	0.259478	9	High	CoMeTa|DIANA|ElMMo3|MirAncesTar|miRDB|MirMAP|Mirza-G|PACCMIT|RNAhybrid
ATP2A1	Q9C0D5		hsa-miR-1248	0.259402	8	High	Cupid|DIANA|ElMMo3|MBStar|MirAncesTar|miRDB|MirMAP|Mirza-G
TANC1	Q92813		hsa-miR-1248	0.259402	10	High	BiTargeting|CoMeTa|DIANA|ElMMo3|MBStar|MirAncesTar|miRDB|MirMAP|RepTar|RNAhybrid
DIO2	Q15691		hsa-miR-1248	0.259388	5	High	CoMeTa|Cupid|MirAncesTar|RepTar|RNAhybrid
MAPRE1	Q9NPH9		hsa-miR-1248	0.259327	10	High	CoMeTa|DIANA|ElMMo3|MirAncesTar|miRDB|MirMAP|MirTar|Mirza-G|RNAhybrid|TargetSpy
IL26	P03956		hsa-miR-1248	0.259201	10	High	CoMeTa|DIANA|ElMMo3|MBStar|MirAncesTar|miRDB|MirMAP|MirSNP|RepTar|TargetSpy
MMP1	Q14722		hsa-miR-1248	0.25886	10	High	CoMeTa|DIANA|ElMMo3|MBStar|MirAncesTar|miRDB|MirMAP|Mirza-G|PACCMIT|RNAhybrid
KCNAB1	Q6FHJ7		hsa-miR-1248	0.258804	10	High	DIANA|ElMMo3|MirAncesTar|miRDB|MirMAP|MirSNP|MirTar|Mirza-G|RepTar|RNAhybrid
SFRP4	Q8NBI5		hsa-miR-1248	0.258716	10	High	DIANA|ElMMo3|MirAncesTar|miRDB|MirMAP|MirSNP|MirTar|Mirza-G|RepTar|RNAhybrid
SLC43A3	P41145		hsa-miR-1248	0.258303	11	High	BiTargeting|CoMeTa|DIANA|ElMMo3|MirAncesTar|miRDB|MirMAP|MirSNP|Mirza-G|RNAhybrid|TargetSpy
OPRK1	Q9NY30		hsa-miR-1248	0.258303	9	High	CoMeTa|ElMMo3|MBStar|MirAncesTar|MirMAP|MirSNP|PACCMIT|RepTar|RNAhybrid
BTG4	Q15796		hsa-miR-1248	0.257995	10	High	DIANA|ElMMo3|MBStar|MirAncesTar|miRDB|MirMAP|MirTar|RepTar|RNAhybrid|TargetSpy
SMAD2	P54803		hsa-miR-1248	0.257983	10	High	CoMeTa|DIANA|ElMMo3|MBStar|MirAncesTar|miRDB|MirMAP|MirSNP|Mirza-G|RNAhybrid
GALC	P48058		hsa-miR-1248	0.257786	11	High	CoMeTa|DIANA|ElMMo3|MBStar|MirAncesTar|miRDB|MirMAP|Mirza-G|RepTar|RNAhybrid|TargetSpy
GRIA4	Q96C34		hsa-miR-1248	0.257603	11	High	DIANA|ElMMo3|MBStar|MirAncesTar|miRDB|MirMAP|MirTar|Mirza-G|RepTar|RNAhybrid|TargetSpy
RUNDC1	Q8IZQ1		hsa-miR-1248	0.257448	7	High	CoMeTa|Cupid|DIANA|ElMMo3|MBStar|MirAncesTar|MirMAP
WDFY3	P49023		hsa-miR-1248	0.257437	10	High	CoMeTa|DIANA|ElMMo3|MBStar|MirAncesTar|miRDB|MirMAP|Mirza-G|RepTar|RNAhybrid
PXN	Q9HCM4		hsa-miR-1248	0.257163	11	High	CoMeTa|DIANA|ElMMo3|MBStar|MirAncesTar|miRDB|MirMAP|MirSNP|MirTar|Mirza-G|RNAhybrid
EPB41L5	Q9BRV8		hsa-miR-1248	0.256408	10	High	BiTargeting|CoMeTa|ElMMo3|MBStar|MirAncesTar|miRDB|MirMAP|Mirza-G|RepTar|TargetSpy
SIKE1	P58335		hsa-miR-1248	0.256116	10	High	DIANA|ElMMo3|MBStar|MirAncesTar|miRDB|MirMAP|MirTar|Mirza-G|RepTar|RNAhybrid
ANTXR2	Q9NR64		hsa-miR-1248	0.255847	11	High	CoMeTa|DIANA|ElMMo3|MBStar|MirAncesTar|miRDB|MirMAP|Mirza-G|RepTar|RNAhybrid|TargetSpy
KLHL1	P13716		hsa-miR-1248	0.255845	12	High	BiTargeting|DIANA|ElMMo3|MirAncesTar|miRDB|MirMAP|MirSNP|MirTar|Mirza-G|RepTar|RNAhybrid|TargetSpy
ALAD	Q9UKV0		hsa-miR-1248	0.255828	10	High	CoMeTa|DIANA|ElMMo3|MBStar|MirAncesTar|MirMAP|Mirza-G|RepTar|RNAhybrid|TargetSpy
HDAC9	Q92574		hsa-miR-1248	0.255783	11	High	BiTargeting|DIANA|ElMMo3|MBStar|MirAncesTar|miRDB|MirMAP|MirSNP|RepTar|RNAhybrid|TargetSpy
TSC1	Q13936		hsa-miR-1248	0.2557	11	High	BiTargeting|CoMeTa|DIANA|ElMMo3|MBStar|MirAncesTar|miRDB|MirMAP|Mirza-G|RNAhybrid|TargetSpy
CACNA1C	P40617		hsa-miR-1248	0.255692	10	High	CoMeTa|ElMMo3|MBStar|MirAncesTar|miRDB|MirMAP|Mirza-G|RepTar|RNAhybrid|TargetSpy
ARL4A	Q9NRQ2		hsa-miR-1248	0.25478	9	High	CoMeTa|DIANA|ElMMo3|MBStar|MirAncesTar|miRDB|MirMAP|Mirza-G|RNAhybrid
PLSCR4	O95239		hsa-miR-1248	0.25469	10	High	CoMeTa|DIANA|ElMMo3|MBStar|MirAncesTar|miRDB|MirMAP|Mirza-G|RepTar|RNAhybrid
KIF4A	Q96DE0		hsa-miR-1248	0.254614	10	High	DIANA|ElMMo3|MBStar|MirAncesTar|miRDB|MirMAP|MirTar|Mirza-G|RepTar|RNAhybrid
NUDT16	P61204		hsa-miR-1248	0.254476	10	High	CoMeTa|DIANA|ElMMo3|MirAncesTar|miRDB|MirMAP|Mirza-G|RepTar|RNAhybrid|TargetSpy
ARF3	A6H8Z2		hsa-miR-1248	0.254197	8	High	DIANA|ElMMo3|MirAncesTar|miRDB|MirMAP|MirTar|Mirza-G|RNAhybrid
FAM221B	Q9UPN9		hsa-miR-1248	0.253673	8	High	CoMeTa|DIANA|ElMMo3|MBStar|MirAncesTar|MirMAP|RNA22|TargetSpy
TRIM33	O43155		hsa-miR-1248	0.253622	11	High	CoMeTa|DIANA|ElMMo3|MBStar|MirAncesTar|miRDB|MirMAP|MirSNP|Mirza-G|RNAhybrid|TargetSpy
FLRT2	Q9H706		hsa-miR-1248	0.253281	10	High	BiTargeting|CoMeTa|DIANA|ElMMo3|MBStar|MirAncesTar|miRDB|MirMAP|RNAhybrid|TargetSpy
GAREM1	P0C7W6		hsa-miR-1248	0.253264	10	High	DIANA|ElMMo3|MBStar|MirAncesTar|miRDB|MirMAP|MirTar|Mirza-G|RepTar|TargetSpy
CCDC172	Q13361		hsa-miR-1248	0.253263	10	High	CoMeTa|DIANA|ElMMo3|MBStar|MirAncesTar|miRDB|MirMAP|Mirza-G|RNAhybrid|TargetSpy
MFAP5	Q8WUH6		hsa-miR-1248	0.253244	11	High	DIANA|ElMMo3|MBStar|MirAncesTar|miRDB|MirMAP|MirTar|Mirza-G|RepTar|RNAhybrid|TargetSpy
TMEM263	P54821		hsa-miR-1248	0.253203	9	High	CoMeTa|DIANA|ElMMo3|MBStar|MirAncesTar|MirMAP|RepTar|RNA22|RNAhybrid
PRRX1	Q68D85		hsa-miR-1248	0.253082	7	High	DIANA|MirAncesTar|miRDB|MirMAP|MirTar|Mirza-G|RNAhybrid
NCR3LG1	Q49AJ0		hsa-miR-1248	0.253062	12	High	BiTargeting|DIANA|ElMMo3|MBStar|MirAncesTar|miRDB|MirMAP|MirSNP|Mirza-G|PACCMIT|RepTar|RNAhybrid
FAM135B	Q96HH9		hsa-miR-1248	0.252867	9	High	CoMeTa|DIANA|ElMMo3|MBStar|MirAncesTar|miRDB|MirMAP|RNAhybrid|TargetSpy
GRAMD2B	Q53TN4		hsa-miR-1248	0.252858	9	High	CoMeTa|DIANA|ElMMo3|MBStar|MirAncesTar|miRDB|MirMAP|Mirza-G|RNAhybrid
CYBRD1	Q5SW79		hsa-miR-1248	0.252701	9	High	CoMeTa|DIANA|ElMMo3|MBStar|MirAncesTar|MirMAP|RNA22|RNAhybrid|TargetSpy
CEP170	Q8IUZ0		hsa-miR-1248	0.252674	11	High	DIANA|ElMMo3|MBStar|MirAncesTar|miRDB|MirMAP|MirTar|Mirza-G|RepTar|RNAhybrid|TargetSpy
LRRC49	O94905		hsa-miR-1248	0.252466	9	High	CoMeTa|DIANA|ElMMo3|MBStar|MirAncesTar|miRDB|MirMAP|RNAhybrid|TargetSpy
ERLIN2	O00423		hsa-miR-1248	0.252386	10	High	CoMeTa|DIANA|ElMMo3|MBStar|MirAncesTar|miRDB|MirMAP|Mirza-G|RepTar|RNAhybrid
EML1	Q9UPW8		hsa-miR-1248	0.252352	11	High	BiTargeting|DIANA|ElMMo3|MBStar|MirAncesTar|miRDB|MirMAP|Mirza-G|RepTar|RNAhybrid|TargetSpy
UNC13A	Q96K17		hsa-miR-1248	0.252338	10	High	BiTargeting|Cupid|DIANA|MBStar|MirAncesTar|MirMAP|Mirza-G|RepTar|RNA22|RNAhybrid
BTF3L4	P56748		hsa-miR-1248	0.252067	9	High	CoMeTa|DIANA|ElMMo3|MBStar|MirAncesTar|miRDB|MirMAP|Mirza-G|RepTar
CLDN8	P30040		hsa-miR-1248	0.251749	9	High	CoMeTa|DIANA|ElMMo3|MirAncesTar|miRDB|MirMAP|MirSNP|RepTar|RNAhybrid
ERP29	P26718		hsa-miR-1248	0.251725	11	High	DIANA|ElMMo3|MBStar|MirAncesTar|miRDB|MirMAP|MirSNP|MirTar|RepTar|RNAhybrid|TargetSpy
KLRK1	O75953		hsa-miR-1248	0.251704	9	High	CoMeTa|DIANA|ElMMo3|MirAncesTar|miRDB|MirMAP|MirTar|RepTar|RNAhybrid
DNAJB5	Q9NYM9		hsa-miR-1248	0.251356	11	High	BiTargeting|DIANA|ElMMo3|MirAncesTar|miRDB|MirMAP|MirSNP|Mirza-G|RepTar|RNAhybrid|TargetSpy
BET1L	Q14140		hsa-miR-1248	0.251297	4	High	CoMeTa|Cupid|MirAncesTar|MirMAP
SERTAD2	Q9Y6K5		hsa-miR-1248	0.251103	11	High	CoMeTa|DIANA|ElMMo3|MBStar|MirAncesTar|miRDB|MirMAP|MirSNP|Mirza-G|RNAhybrid|TargetSpy
OAS3	Q96T49		hsa-miR-1248	0.251043	10	High	CoMeTa|DIANA|ElMMo3|MBStar|MirAncesTar|miRDB|MirMAP|Mirza-G|RepTar|TargetSpy
PPP1R16B	Q9Y5B9		hsa-miR-1248	0.251015	10	High	CoMeTa|DIANA|ElMMo3|MBStar|MirAncesTar|miRDB|MirMAP|Mirza-G|RNAhybrid|TargetSpy
SUPT16H	Q96DX7		hsa-miR-1248	0.251009	7	High	CoMeTa|ElMMo3|MirAncesTar|miRDB|MirSNP|MirTar|RepTar
TRIM44	Q9H6K4		hsa-miR-1248	0.25088	11	High	BiTargeting|CoMeTa|DIANA|ElMMo3|MBStar|MirAncesTar|miRDB|MirMAP|MirSNP|RepTar|RNAhybrid
OPA3	Q06455		hsa-miR-1248	0.250841	6	High	BiTargeting|CoMeTa|Cupid|MBStar|MirAncesTar|RNAhybrid
RUNX1T1	Q9UEE5		hsa-miR-1248	0.250661	8	High	CoMeTa|DIANA|ElMMo3|MirAncesTar|miRDB|MirMAP|Mirza-G|TargetSpy
STK17A	Q13464		hsa-miR-1248	0.250527	8	High	CoMeTa|DIANA|ElMMo3|MBStar|MirAncesTar|MirMAP|RNAhybrid|TargetSpy
ROCK1	Q7L099		hsa-miR-1248	0.250499	9	High	DIANA|ElMMo3|MBStar|MirAncesTar|miRDB|MirMAP|Mirza-G|RNAhybrid|TargetSpy
RUFY3	Q9HAH7		hsa-miR-1248	0.250455	8	High	CoMeTa|DIANA|ElMMo3|MirAncesTar|miRDB|MirMAP|PACCMIT|RNAhybrid
FBRS	P30968		hsa-miR-1248	0.250178	10	High	CoMeTa|DIANA|ElMMo3|MBStar|MirAncesTar|miRDB|MirMAP|Mirza-G|RNAhybrid|TargetSpy
GNRHR	O15539		hsa-miR-1248	0.250052	11	High	DIANA|ElMMo3|MBStar|MirAncesTar|miRDB|MirMAP|MirTar|RepTar|RNA22|RNAhybrid|TargetSpy
RGS5	Q96EQ0		hsa-miR-1248	0.249969	10	High	DIANA|ElMMo3|MBStar|MirAncesTar|miRDB|MirMAP|MirTar|Mirza-G|RepTar|TargetSpy
SGTB	Q96QZ7		hsa-miR-1248	0.24984	10	High	CoMeTa|ElMMo3|MBStar|MirAncesTar|MirMAP|MirSNP|Mirza-G|RepTar|RNAhybrid|TargetSpy
MAGI1	Q8NFZ3		hsa-miR-1248	0.249728	11	High	BiTargeting|CoMeTa|DIANA|ElMMo3|MBStar|MirAncesTar|miRDB|MirMAP|MirTar|Mirza-G|RNAhybrid
NLGN4Y	Q12873		hsa-miR-1248	0.249584	10	High	BiTargeting|CoMeTa|DIANA|ElMMo3|MirAncesTar|miRDB|MirMAP|Mirza-G|RepTar|RNAhybrid
CHD3	Q9UIB8		hsa-miR-1248	0.249541	10	High	CoMeTa|DIANA|ElMMo3|MBStar|MirAncesTar|miRDB|MirMAP|Mirza-G|RNA22|RNAhybrid
CD84	P36897		hsa-miR-1248	0.249521	7	High	CoMeTa|Cupid|DIANA|MBStar|MirAncesTar|MirMAP|RNAhybrid
TGFBR1	Q13316		hsa-miR-1248	0.249359	11	High	CoMeTa|DIANA|ElMMo3|MBStar|MirAncesTar|miRDB|MirMAP|MirSNP|Mirza-G|RepTar|RNAhybrid
DMP1	P55287		hsa-miR-1248	0.24922	7	High	CoMeTa|DIANA|MBStar|MirAncesTar|MirMAP|PACCMIT|RNAhybrid
CDH11	Q9NNX6		hsa-miR-1248	0.249065	10	High	CoMeTa|DIANA|ElMMo3|MirAncesTar|miRDB|MirMAP|Mirza-G|RepTar|RNAhybrid|TargetSpy
CD209	P21802		hsa-miR-1248	0.248964	9	High	CoMeTa|DIANA|ElMMo3|MirAncesTar|miRDB|MirMAP|Mirza-G|RNAhybrid|TargetSpy
FGFR2	P50748		hsa-miR-1248	0.248916	8	High	CoMeTa|DIANA|ElMMo3|MirAncesTar|miRDB|MirMAP|RNAhybrid|TargetSpy
KNTC1	Q8N9I0		hsa-miR-1248	0.248493	11	High	BiTargeting|DIANA|ElMMo3|MBStar|MirAncesTar|miRDB|MirMAP|Mirza-G|RepTar|RNA22|TargetSpy
SYT2	O15270		hsa-miR-1248	0.248472	8	High	CoMeTa|DIANA|ElMMo3|MirAncesTar|miRDB|MirMAP|RepTar|RNAhybrid
SPTLC2	Q86SQ0		hsa-miR-1248	0.248324	10	High	ElMMo3|MBStar|MirAncesTar|miRDB|MirMAP|MirTar|Mirza-G|PACCMIT|RNAhybrid|TargetSpy
PHLDB2	Q6ZN79		hsa-miR-1248	0.248288	11	High	DIANA|ElMMo3|MBStar|MirAncesTar|miRDB|MirMAP|MirTar|Mirza-G|RepTar|RNAhybrid|TargetSpy
ZNF705A	P15018		hsa-miR-1248	0.248231	10	High	CoMeTa|DIANA|ElMMo3|MBStar|MirAncesTar|miRDB|MirMAP|Mirza-G|RNAhybrid|TargetSpy
LIF	P57058		hsa-miR-1248	0.248222	10	High	CoMeTa|DIANA|ElMMo3|MBStar|MirAncesTar|miRDB|MirMAP|RepTar|RNAhybrid|TargetSpy
HUNK	Q8NCP5		hsa-miR-1248	0.247887	9	High	CoMeTa|DIANA|ElMMo3|MirAncesTar|miRDB|MirMAP|MirTar|RNAhybrid|TargetSpy
ZBTB44	O75054		hsa-miR-1248	0.247865	10	High	BiTargeting|CoMeTa|DIANA|ElMMo3|MirAncesTar|miRDB|MirMAP|Mirza-G|RepTar|RNA22
IGSF3	Q08493		hsa-miR-1248	0.247797	10	High	BiTargeting|DIANA|ElMMo3|MBStar|MirAncesTar|miRDB|MirMAP|MirTar|Mirza-G|RNAhybrid
PDE4C	O75882		hsa-miR-1248	0.247793	10	High	CoMeTa|DIANA|ElMMo3|MBStar|MirAncesTar|miRDB|MirMAP|MirSNP|RepTar|RNAhybrid
ATRN	A6NI79		hsa-miR-1248	0.247781	11	High	CoMeTa|DIANA|ElMMo3|MBStar|MirAncesTar|miRDB|MirMAP|Mirza-G|RepTar|RNAhybrid|TargetSpy
CCDC69	O75915		hsa-miR-1248	0.247698	11	High	DIANA|ElMMo3|MBStar|MirAncesTar|miRDB|MirMAP|MirSNP|MirTar|Mirza-G|RNAhybrid|TargetSpy
ARL6IP5	O94929		hsa-miR-1248	0.247227	10	High	CoMeTa|DIANA|ElMMo3|MBStar|MirAncesTar|miRDB|MirMAP|Mirza-G|RepTar|RNAhybrid
ABLIM3	Q7Z2Y5		hsa-miR-1248	0.247038	10	High	DIANA|ElMMo3|MirAncesTar|miRDB|MirMAP|MirTar|Mirza-G|PACCMIT|RNAhybrid|TargetSpy
NRK	Q14738		hsa-miR-1248	0.247002	8	High	CoMeTa|DIANA|ElMMo3|MirAncesTar|miRDB|MirMAP|Mirza-G|RNAhybrid
PPP2R5D	Q6ZN30		hsa-miR-1248	0.246768	10	High	BiTargeting|CoMeTa|ElMMo3|MBStar|MirAncesTar|MirMAP|MirSNP|Mirza-G|RepTar|RNAhybrid
BNC2	Q8TD26		hsa-miR-1248	0.246738	8	High	Cupid|DIANA|ElMMo3|MBStar|MirAncesTar|MirMAP|RNAhybrid|TargetSpy
CHD6	Q9H4D0		hsa-miR-1248	0.246717	10	High	BiTargeting|CoMeTa|DIANA|ElMMo3|MBStar|MirAncesTar|miRDB|MirMAP|Mirza-G|TargetSpy
CLSTN2	Q96B96		hsa-miR-1248	0.246505	11	High	BiTargeting|CoMeTa|ElMMo3|MBStar|MirAncesTar|miRDB|MirMAP|Mirza-G|RepTar|RNAhybrid|TargetSpy
TMEM159	Q8TAC1		hsa-miR-1248	0.246482	10	High	DIANA|ElMMo3|MBStar|MirAncesTar|miRDB|MirMAP|MirTar|Mirza-G|RepTar|RNAhybrid
RFESD	Q9UBP0		hsa-miR-1248	0.246457	8	High	BiTargeting|CoMeTa|DIANA|ElMMo3|MBStar|MirAncesTar|MirMAP|RepTar
SPAST	P15586		hsa-miR-1248	0.246255	11	High	DIANA|ElMMo3|MBStar|MirAncesTar|miRDB|MirMAP|MirSNP|Mirza-G|RepTar|RNAhybrid|TargetSpy
GNS	Q9Y4E5		hsa-miR-1248	0.246201	9	High	BiTargeting|CoMeTa|DIANA|ElMMo3|MBStar|MirAncesTar|MirMAP|Mirza-G|RNAhybrid
ZNF451	Q9NR56		hsa-miR-1248	0.246124	7	High	CoMeTa|DIANA|ElMMo3|MBStar|MirAncesTar|MirMAP|RNAhybrid
MBNL1	P08559		hsa-miR-1248	0.245687	11	High	DIANA|ElMMo3|MBStar|MirAncesTar|miRDB|MirMAP|MirSNP|Mirza-G|RepTar|RNAhybrid|TargetSpy
PDHA1	Q8TEB7		hsa-miR-1248	0.245685	11	High	CoMeTa|DIANA|ElMMo3|MBStar|MirAncesTar|miRDB|MirMAP|Mirza-G|RepTar|RNAhybrid|TargetSpy
RNF128	Q86SQ4		hsa-miR-1248	0.245309	9	High	CoMeTa|DIANA|ElMMo3|MBStar|MirAncesTar|miRDB|MirMAP|Mirza-G|RNAhybrid
ADGRG6	P58166		hsa-miR-1248	0.245308	10	High	CoMeTa|DIANA|ElMMo3|MirAncesTar|miRDB|MirMAP|MirTar|Mirza-G|RepTar|RNAhybrid
INHBE	P36382		hsa-miR-1248	0.245202	12	High	CoMeTa|DIANA|ElMMo3|MBStar|MirAncesTar|miRDB|MirMAP|Mirza-G|RepTar|RNA22|RNAhybrid|TargetSpy
GJA5	Q86T75		hsa-miR-1248	0.244988	8	High	CoMeTa|DIANA|MBStar|MirAncesTar|MirMAP|RepTar|RNA22|RNAhybrid
NBPF11	P78380		hsa-miR-1248	0.244984	11	High	DIANA|ElMMo3|MBStar|MirAncesTar|miRDB|MirMAP|MirTar|Mirza-G|RepTar|RNAhybrid|TargetSpy
OLR1	P48357		hsa-miR-1248	0.244949	10	High	CoMeTa|DIANA|ElMMo3|MBStar|MirAncesTar|miRDB|MirMAP|Mirza-G|RNA22|RNAhybrid
LEPR	Q9NR81		hsa-miR-1248	0.244925	10	High	CoMeTa|DIANA|ElMMo3|MBStar|MirAncesTar|miRDB|MirMAP|Mirza-G|RepTar|RNAhybrid
ARHGEF3	O15037		hsa-miR-1248	0.244802	11	High	BiTargeting|CoMeTa|DIANA|ElMMo3|MBStar|MirAncesTar|miRDB|MirMAP|Mirza-G|RepTar|RNAhybrid
KHNYN	Q96JE9		hsa-miR-1248	0.244686	12	High	BiTargeting|Cupid|DIANA|ElMMo3|MBStar|MirAncesTar|miRDB|MirMAP|MirSNP|Mirza-G|RepTar|RNAhybrid
MAP6	Q6ZTA4		hsa-miR-1248	0.244678	11	High	BiTargeting|DIANA|ElMMo3|MBStar|MirAncesTar|miRDB|MirMAP|Mirza-G|RepTar|RNAhybrid|TargetSpy
TRIM67	Q8TAA9		hsa-miR-1248	0.244651	12	High	CoMeTa|DIANA|ElMMo3|MBStar|MirAncesTar|miRDB|MirMAP|Mirza-G|RepTar|RNA22|RNAhybrid|TargetSpy
VANGL1	Q8IVF7		hsa-miR-1248	0.244522	9	High	DIANA|ElMMo3|MBStar|MirAncesTar|miRDB|MirMAP|Mirza-G|RepTar|RNAhybrid
FMNL3	Q96D46		hsa-miR-1248	0.244464	8	High	CoMeTa|DIANA|MBStar|MirAncesTar|MirMAP|Mirza-G|RepTar|RNAhybrid
NMD3	O75396		hsa-miR-1248	0.244285	10	High	CoMeTa|ElMMo3|MBStar|MirAncesTar|miRDB|MirSNP|Mirza-G|RNA22|RNAhybrid|TargetSpy
SEC22B	O75317		hsa-miR-1248	0.244277	10	High	CoMeTa|DIANA|ElMMo3|MBStar|MirAncesTar|miRDB|MirMAP|MirSNP|Mirza-G|RNAhybrid
USP12	Q9Y2E6		hsa-miR-1248	0.244211	8	High	CoMeTa|DIANA|ElMMo3|MBStar|MirAncesTar|miRDB|MirMAP|RepTar
DTX4	Q9UBH6		hsa-miR-1248	0.244055	11	High	DIANA|ElMMo3|MBStar|MirAncesTar|miRDB|MirMAP|MirSNP|MirTar|Mirza-G|RNA22|TargetSpy
XPR1	Q8NFD5		hsa-miR-1248	0.244039	9	High	BiTargeting|ElMMo3|MirAncesTar|miRDB|MirMAP|MirTar|Mirza-G|PACCMIT|RNAhybrid
ARID1B	Q6PKG0		hsa-miR-1248	0.24399	8	High	CoMeTa|DIANA|ElMMo3|MirAncesTar|miRDB|MirMAP|RepTar|RNAhybrid
LARP1	Q13522		hsa-miR-1248	0.243984	10	High	CoMeTa|DIANA|ElMMo3|MirAncesTar|miRDB|MirMAP|MirSNP|Mirza-G|RepTar|RNAhybrid
PPP1R1A	Q8WXA9		hsa-miR-1248	0.243853	6	High	CoMeTa|DIANA|MBStar|MirAncesTar|MirMAP|RNAhybrid
SREK1	Q6J9G0		hsa-miR-1248	0.243824	10	High	CoMeTa|DIANA|ElMMo3|MBStar|MirAncesTar|miRDB|MirMAP|MirSNP|Mirza-G|TargetSpy
STYK1	Q9Y2C2		hsa-miR-1248	0.243704	9	High	CoMeTa|DIANA|ElMMo3|MBStar|MirAncesTar|miRDB|MirMAP|RepTar|TargetSpy
UST	Q9UL18		hsa-miR-1248	0.243641	9	High	CoMeTa|DIANA|ElMMo3|MBStar|MirAncesTar|MirMAP|Mirza-G|RepTar|RNA22
AGO1	Q9UQM7		hsa-miR-1248	0.243602	11	High	CoMeTa|DIANA|ElMMo3|MBStar|MirAncesTar|miRDB|MirMAP|MirSNP|Mirza-G|RepTar|RNAhybrid
CAMK2A	Q9NR30		hsa-miR-1248	0.243587	8	High	CoMeTa|DIANA|ElMMo3|MirAncesTar|miRDB|MirMAP|Mirza-G|TargetSpy
DDX21	Q9H6X2		hsa-miR-1248	0.243559	10	High	CoMeTa|DIANA|ElMMo3|MBStar|MirAncesTar|miRDB|MirMAP|Mirza-G|RepTar|RNAhybrid
ANTXR1	Q5JTZ9		hsa-miR-1248	0.243516	10	High	ElMMo3|MBStar|MirAncesTar|miRDB|MirMAP|MirSNP|MirTar|Mirza-G|RepTar|TargetSpy
AARS2	Q9NWB7		hsa-miR-1248	0.243352	9	High	CoMeTa|DIANA|ElMMo3|MirAncesTar|miRDB|MirMAP|Mirza-G|RNAhybrid|TargetSpy
IFT57	Q9P286		hsa-miR-1248	0.243306	6	High	CoMeTa|Cupid|DIANA|MirAncesTar|MirMAP|Mirza-G
PAK5	O94923		hsa-miR-1248	0.243172	10	High	CoMeTa|DIANA|ElMMo3|MBStar|MirAncesTar|miRDB|MirMAP|MirSNP|Mirza-G|TargetSpy
GLCE	Q02742		hsa-miR-1248	0.243018	10	High	BiTargeting|CoMeTa|DIANA|ElMMo3|MBStar|MirAncesTar|miRDB|MirMAP|MirSNP|MirTar
GCNT1	Q86TG7		hsa-miR-1248	0.242953	9	High	CoMeTa|DIANA|ElMMo3|MBStar|MirAncesTar|miRDB|MirMAP|Mirza-G|TargetSpy
PEG10	Q8N660		hsa-miR-1248	0.242857	9	High	CoMeTa|DIANA|ElMMo3|MBStar|MirAncesTar|MirMAP|RepTar|RNA22|RNAhybrid
NBPF15	P17010		hsa-miR-1248	0.242756	8	High	CoMeTa|Cupid|DIANA|MBStar|MirAncesTar|MirMAP|Mirza-G|RNAhybrid
ZFX	A0JLT2		hsa-miR-1248	0.242596	10	High	DIANA|ElMMo3|MBStar|MirAncesTar|miRDB|MirMAP|MirTar|Mirza-G|PACCMIT|RNAhybrid
MED19	Q7Z3K3		hsa-miR-1248	0.242524	8	High	Cupid|DIANA|MBStar|MirAncesTar|MirMAP|Mirza-G|RNA22|RNAhybrid
POGZ	Q04721		hsa-miR-1248	0.242481	12	High	BiTargeting|DIANA|ElMMo3|MBStar|MirAncesTar|miRDB|MirMAP|MirSNP|Mirza-G|RNA22|RNAhybrid|TargetSpy
NOTCH2	P16035		hsa-miR-1248	0.242445	12	High	BiTargeting|DIANA|ElMMo3|MBStar|MirAncesTar|miRDB|MirMAP|MirSNP|Mirza-G|RepTar|RNAhybrid|TargetSpy
TIMP2	Q8N4A0		hsa-miR-1248	0.242261	10	High	DIANA|ElMMo3|MBStar|MirAncesTar|miRDB|MirMAP|MirTar|Mirza-G|RepTar|TargetSpy
GALNT4	Q9Y3M8		hsa-miR-1248	0.242226	10	High	CoMeTa|DIANA|ElMMo3|MBStar|MirAncesTar|miRDB|MirMAP|MirSNP|Mirza-G|RNAhybrid
STARD13	Q13217		hsa-miR-1248	0.24195	9	High	BiTargeting|ElMMo3|MBStar|MirAncesTar|miRDB|MirSNP|MirTar|Mirza-G|RNAhybrid
DNAJC3	Q9NPG1		hsa-miR-1248	0.241894	10	High	BiTargeting|DIANA|ElMMo3|MBStar|MirAncesTar|miRDB|MirMAP|MirSNP|MirTar|Mirza-G
FZD3	Q9NR21		hsa-miR-1248	0.241797	11	High	BiTargeting|CoMeTa|DIANA|ElMMo3|MBStar|MirAncesTar|miRDB|MirMAP|Mirza-G|RepTar|RNAhybrid
PARP11	P01116		hsa-miR-1248	0.241732	10	High	DIANA|ElMMo3|MirAncesTar|miRDB|MirMAP|MirSNP|Mirza-G|RepTar|RNAhybrid|TargetSpy
KRAS	A6NHR9		hsa-miR-1248	0.241573	9	High	DIANA|ElMMo3|MirAncesTar|miRDB|MirMAP|MirTar|Mirza-G|RNAhybrid|TargetSpy
SMCHD1	Q2VIQ3		hsa-miR-1248	0.241566	10	High	DIANA|ElMMo3|MBStar|MirAncesTar|miRDB|MirMAP|MirTar|Mirza-G|RepTar|RNAhybrid
KIF4B	P40855		hsa-miR-1248	0.241443	11	High	CoMeTa|ElMMo3|MBStar|MirAncesTar|miRDB|MirMAP|Mirza-G|RepTar|RNA22|RNAhybrid|TargetSpy
PEX19	Q9P2B7		hsa-miR-1248	0.241434	11	High	DIANA|ElMMo3|MBStar|MirAncesTar|miRDB|MirMAP|MirTar|Mirza-G|RepTar|RNAhybrid|TargetSpy
CFAP97	P08493		hsa-miR-1248	0.241411	9	High	DIANA|ElMMo3|MBStar|MirAncesTar|miRDB|MirMAP|MirTar|Mirza-G|RNAhybrid
MGP	Q9BTE1		hsa-miR-1248	0.241373	11	High	DIANA|ElMMo3|MBStar|MirAncesTar|miRDB|MirMAP|MirSNP|Mirza-G|RepTar|RNAhybrid|TargetSpy
DCTN5	Q8NHQ8		hsa-miR-1248	0.241347	6	High	CoMeTa|Cupid|MBStar|MirAncesTar|MirMAP|RNAhybrid
RASSF8	P22626		hsa-miR-1248	0.241277	9	High	CoMeTa|DIANA|ElMMo3|MBStar|MirAncesTar|miRDB|MirMAP|Mirza-G|RNAhybrid
HNRNPA2B1	Q9GZZ1		hsa-miR-1248	0.241169	8	High	BiTargeting|CoMeTa|ElMMo3|MBStar|MirAncesTar|MirMAP|RepTar|RNAhybrid
NAA50	Q16676		hsa-miR-1248	0.241064	9	High	Cupid|DIANA|ElMMo3|MBStar|MirAncesTar|miRDB|MirMAP|MirSNP|RNAhybrid
FOXD1	Q6ZMG9		hsa-miR-1248	0.240903	9	High	BiTargeting|DIANA|ElMMo3|MBStar|MirAncesTar|miRDB|MirMAP|RepTar|TargetSpy
CERS6	P15036		hsa-miR-1248	0.240875	9	High	CoMeTa|DIANA|ElMMo3|MBStar|MirAncesTar|miRDB|MirMAP|Mirza-G|TargetSpy
ETS2	O95758		hsa-miR-1248	0.24083	8	High	BiTargeting|CoMeTa|ElMMo3|MBStar|MirAncesTar|MirMAP|RNAhybrid|TargetSpy
PTBP3	O60825		hsa-miR-1248	0.240706	10	High	BiTargeting|CoMeTa|ElMMo3|MBStar|MirAncesTar|MirMAP|RepTar|RNA22|RNAhybrid|TargetSpy
PFKFB2	A4D1B5		hsa-miR-1248	0.240617	9	High	CoMeTa|DIANA|ElMMo3|MBStar|MirAncesTar|MirMAP|Mirza-G|RNAhybrid|TargetSpy
GSAP	Q8TDW0		hsa-miR-1248	0.240587	11	High	BiTargeting|DIANA|ElMMo3|MBStar|MirAncesTar|miRDB|MirMAP|Mirza-G|RNA22|RNAhybrid|TargetSpy
LRRC8C	P41247		hsa-miR-1248	0.240442	10	High	DIANA|ElMMo3|MBStar|MirAncesTar|miRDB|MirMAP|MirTar|Mirza-G|RNAhybrid|TargetSpy
PNPLA4	Q63ZY3		hsa-miR-1248	0.240435	11	High	BiTargeting|DIANA|ElMMo3|MirAncesTar|miRDB|MirMAP|MirSNP|Mirza-G|RepTar|RNAhybrid|TargetSpy
KANK2	P32418		hsa-miR-1248	0.240402	11	High	CoMeTa|DIANA|ElMMo3|MBStar|MirAncesTar|miRDB|MirMAP|MirSNP|Mirza-G|RepTar|RNAhybrid
SLC8A1	O60506		hsa-miR-1248	0.240181	7	High	Cupid|DIANA|ElMMo3|MBStar|MirAncesTar|miRDB|MirMAP
SYNCRIP	Q9ULW8		hsa-miR-1248	0.240078	11	High	DIANA|ElMMo3|MirAncesTar|miRDB|MirMAP|MirSNP|MirTar|Mirza-G|RepTar|RNA22|RNAhybrid
PADI3	Q9C0K1		hsa-miR-1248	0.239906	9	High	DIANA|ElMMo3|MBStar|MirAncesTar|miRDB|MirMAP|MirSNP|MirTar|RNAhybrid
SLC39A8	Q8N6T3		hsa-miR-1248	0.239758	8	High	CoMeTa|DIANA|ElMMo3|MirAncesTar|miRDB|MirMAP|PACCMIT|RNAhybrid
ARFGAP1	Q6ZVF9		hsa-miR-1248	0.239735	9	High	DIANA|ElMMo3|MBStar|MirAncesTar|miRDB|MirMAP|MirSNP|MirTar|Mirza-G
GPRIN3	Q5T4T1		hsa-miR-1248	0.239683	9	High	DIANA|ElMMo3|MBStar|MirAncesTar|miRDB|MirMAP|MirSNP|MirTar|TargetSpy
TMEM170B	Q5H9K5		hsa-miR-1248	0.239434	9	High	DIANA|ElMMo3|MBStar|MirAncesTar|miRDB|MirMAP|MirTar|Mirza-G|RNAhybrid
ZMAT1	P58658		hsa-miR-1248	0.238854	9	High	DIANA|ElMMo3|MBStar|MirAncesTar|miRDB|MirMAP|MirSNP|PACCMIT|RNAhybrid
EVA1C	Q8WWZ4		hsa-miR-1248	0.238842	10	High	DIANA|ElMMo3|MBStar|MirAncesTar|miRDB|MirMAP|MirTar|Mirza-G|RepTar|RNAhybrid
ABCA10	Q8NG68		hsa-miR-1248	0.238752	10	High	DIANA|ElMMo3|MBStar|MirAncesTar|miRDB|MirMAP|MirSNP|Mirza-G|RepTar|TargetSpy
TTL	P49184		hsa-miR-1248	0.238649	11	High	DIANA|ElMMo3|MBStar|MirAncesTar|miRDB|MirMAP|MirTar|Mirza-G|RepTar|RNAhybrid|TargetSpy
DNASE1L1	A6NJ78		hsa-miR-1248	0.238637	10	High	DIANA|ElMMo3|MirAncesTar|miRDB|MirMAP|Mirza-G|PACCMIT|RepTar|RNAhybrid|TargetSpy
METTL15	Q7L590		hsa-miR-1248	0.238625	11	High	DIANA|ElMMo3|MBStar|MirAncesTar|miRDB|MirMAP|MirSNP|MirTar|Mirza-G|RNAhybrid|TargetSpy
MCM10	O60477		hsa-miR-1248	0.23851	10	High	CoMeTa|DIANA|ElMMo3|MBStar|MirAncesTar|miRDB|MirMAP|Mirza-G|RNAhybrid|TargetSpy
BRINP1	P47898		hsa-miR-1248	0.238503	9	High	CoMeTa|DIANA|ElMMo3|MBStar|MirAncesTar|miRDB|MirMAP|MirTar|Mirza-G
HTR5A	P01009		hsa-miR-1248	0.238493	10	High	BiTargeting|DIANA|ElMMo3|MBStar|MirAncesTar|miRDB|MirMAP|MirSNP|MirTar|RNAhybrid
SERPINA1	P56962		hsa-miR-1248	0.238368	9	High	CoMeTa|ElMMo3|MBStar|MirAncesTar|miRDB|MirMAP|Mirza-G|RNAhybrid|TargetSpy
STX17	Q9Y6W8		hsa-miR-1248	0.238246	9	High	CoMeTa|DIANA|ElMMo3|MirAncesTar|miRDB|MirMAP|MirTar|RepTar|RNAhybrid
ICOS	Q99523		hsa-miR-1248	0.237921	11	High	BiTargeting|CoMeTa|DIANA|ElMMo3|MBStar|MirAncesTar|miRDB|MirMAP|Mirza-G|RepTar|RNA22
SORT1	Q9GZP0		hsa-miR-1248	0.23775	8	High	CoMeTa|DIANA|ElMMo3|MBStar|MirAncesTar|MirMAP|RepTar|TargetSpy
PDGFD	Q8IUQ4		hsa-miR-1248	0.237643	9	High	CoMeTa|DIANA|ElMMo3|MBStar|MirAncesTar|miRDB|MirMAP|Mirza-G|RNAhybrid
SIAH1	Q96SR6		hsa-miR-1248	0.23737	11	High	DIANA|ElMMo3|MBStar|MirAncesTar|miRDB|MirMAP|MirTar|Mirza-G|RepTar|RNAhybrid|TargetSpy
ZNF382	Q86T65		hsa-miR-1248	0.237118	10	High	CoMeTa|DIANA|ElMMo3|MBStar|MirAncesTar|miRDB|MirMAP|Mirza-G|RNAhybrid|TargetSpy
DAAM2	Q15326		hsa-miR-1248	0.237043	8	High	CoMeTa|DIANA|ElMMo3|MBStar|MirAncesTar|MirMAP|RNAhybrid|TargetSpy
ZMYND11	P01589		hsa-miR-1248	0.23668	10	High	CoMeTa|DIANA|ElMMo3|MBStar|MirAncesTar|miRDB|MirMAP|MirSNP|RepTar|RNAhybrid
IL2RA	Q14574		hsa-miR-1248	0.236596	9	High	CoMeTa|DIANA|ElMMo3|MBStar|MirAncesTar|miRDB|MirMAP|RNAhybrid|TargetSpy
DSC3	Q9BX66		hsa-miR-1248	0.236462	10	High	CoMeTa|DIANA|ElMMo3|MBStar|MirAncesTar|miRDB|MirMAP|RepTar|RNAhybrid|TargetSpy
SORBS1	Q8N5X7		hsa-miR-1248	0.236378	9	High	BiTargeting|Cupid|DIANA|ElMMo3|MBStar|MirAncesTar|MirMAP|Mirza-G|RNAhybrid
EIF4E3	Q9UPU3		hsa-miR-1248	0.236356	10	High	CoMeTa|DIANA|ElMMo3|MBStar|MirAncesTar|miRDB|MirMAP|Mirza-G|RepTar|RNAhybrid
SORCS3	Q9NQZ3		hsa-miR-1248	0.236276	10	High	CoMeTa|DIANA|ElMMo3|MBStar|MirAncesTar|miRDB|MirMAP|Mirza-G|RNAhybrid|TargetSpy
DAZ1	P31641		hsa-miR-1248	0.23627	8	High	CoMeTa|DIANA|ElMMo3|MBStar|MirAncesTar|miRDB|MirMAP|RNAhybrid
SLC6A6	Q9UII2		hsa-miR-1248	0.235995	9	High	CoMeTa|DIANA|ElMMo3|MirAncesTar|miRDB|MirMAP|Mirza-G|RNAhybrid|TargetSpy
ATPIF1	Q92187		hsa-miR-1248	0.235835	10	High	CoMeTa|ElMMo3|MBStar|MirAncesTar|miRDB|MirMAP|MirSNP|Mirza-G|RNAhybrid|TargetSpy
ST8SIA4	Q96HJ3		hsa-miR-1248	0.23581	9	High	DIANA|ElMMo3|MirAncesTar|miRDB|MirMAP|MirTar|Mirza-G|RNAhybrid|TargetSpy
CCDC34	Q92565		hsa-miR-1248	0.235785	11	High	BiTargeting|CoMeTa|DIANA|ElMMo3|MBStar|MirAncesTar|miRDB|MirMAP|MirSNP|Mirza-G|RNAhybrid
RAPGEF5	Q6ZSA7		hsa-miR-1248	0.235655	9	High	DIANA|ElMMo3|MBStar|MirAncesTar|miRDB|MirMAP|MirTar|Mirza-G|RepTar
LRRC55	Q9BWW8		hsa-miR-1248	0.235629	9	High	BiTargeting|DIANA|ElMMo3|MirAncesTar|miRDB|MirMAP|MirSNP|RepTar|TargetSpy
APOL6	Q8N9L1		hsa-miR-1248	0.235508	10	High	CoMeTa|DIANA|ElMMo3|MBStar|MirAncesTar|miRDB|MirMAP|Mirza-G|RNAhybrid|TargetSpy
ZIC4	P51809		hsa-miR-1248	0.235472	9	High	CoMeTa|DIANA|ElMMo3|MBStar|MirAncesTar|miRDB|MirMAP|Mirza-G|RNAhybrid
VAMP7	O95237		hsa-miR-1248	0.235446	10	High	CoMeTa|DIANA|ElMMo3|MBStar|MirAncesTar|miRDB|MirMAP|Mirza-G|RNAhybrid|TargetSpy
LRAT	P15735		hsa-miR-1248	0.235291	9	High	CoMeTa|DIANA|ElMMo3|MirAncesTar|miRDB|MirMAP|MirTar|Mirza-G|RNAhybrid
PHKG2	P05771		hsa-miR-1248	0.235097	9	High	DIANA|ElMMo3|MBStar|MirAncesTar|miRDB|MirMAP|MirSNP|MirTar|RNAhybrid
PRKCB	O60462		hsa-miR-1248	0.235048	10	High	CoMeTa|DIANA|ElMMo3|MBStar|MirAncesTar|miRDB|MirMAP|MirSNP|Mirza-G|RNAhybrid
NRP2	O60637		hsa-miR-1248	0.234949	9	High	CoMeTa|DIANA|ElMMo3|MBStar|MirAncesTar|miRDB|MirMAP|Mirza-G|RNAhybrid
TSPAN3	P61960		hsa-miR-1248	0.23481	8	High	CoMeTa|ElMMo3|MirAncesTar|miRDB|MirMAP|RepTar|RNAhybrid|TargetSpy
UFM1	Q9NYF3		hsa-miR-1248	0.234801	9	High	CoMeTa|DIANA|ElMMo3|MBStar|MirAncesTar|miRDB|MirMAP|RepTar|RNAhybrid
FAM53C	O95490		hsa-miR-1248	0.234788	7	High	CoMeTa|DIANA|MirAncesTar|MirMAP|PACCMIT|RNA22|RNAhybrid
ADGRL2	Q86W50		hsa-miR-1248	0.234694	10	High	DIANA|ElMMo3|MBStar|MirAncesTar|miRDB|MirMAP|MirTar|RepTar|RNAhybrid|TargetSpy
METTL16	P54756		hsa-miR-1248	0.234684	9	High	DIANA|ElMMo3|MBStar|MirAncesTar|miRDB|MirMAP|MirTar|Mirza-G|RNAhybrid
EPHA5	Q9C0B7		hsa-miR-1248	0.234427	10	High	DIANA|ElMMo3|MBStar|MirAncesTar|miRDB|MirMAP|MirTar|Mirza-G|RNAhybrid|TargetSpy
TANGO6	O75078		hsa-miR-1248	0.234224	9	High	CoMeTa|DIANA|ElMMo3|MirAncesTar|miRDB|MirMAP|Mirza-G|PACCMIT|RNAhybrid
ADAM11	O60942		hsa-miR-1248	0.234221	7	High	CoMeTa|DIANA|ElMMo3|MBStar|MirAncesTar|MirMAP|TargetSpy
RNGTT	Q9UPU5		hsa-miR-1248	0.234187	10	High	CoMeTa|DIANA|ElMMo3|MBStar|MirAncesTar|MirMAP|Mirza-G|RNA22|RNAhybrid|TargetSpy
USP24	Q16587		hsa-miR-1248	0.23415	11	High	BiTargeting|DIANA|ElMMo3|MBStar|MirAncesTar|miRDB|MirMAP|MirTar|Mirza-G|RepTar|RNAhybrid
ZNF74	Q15631		hsa-miR-1248	0.233868	7	High	CoMeTa|MBStar|MirAncesTar|MirMAP|Mirza-G|RepTar|RNAhybrid
TSN	P63096		hsa-miR-1248	0.233772	8	High	CoMeTa|DIANA|ElMMo3|MirAncesTar|miRDB|MirMAP|Mirza-G|RNAhybrid
GNAI1	Q9Y3P9		hsa-miR-1248	0.233744	8	High	BiTargeting|CoMeTa|ElMMo3|MBStar|MirAncesTar|MirMAP|RNAhybrid|TargetSpy
RABGAP1	O60315		hsa-miR-1248	0.233717	10	High	BiTargeting|CoMeTa|DIANA|ElMMo3|MBStar|MirAncesTar|miRDB|MirMAP|Mirza-G|RNAhybrid
ZEB2	Q14494		hsa-miR-1248	0.233686	8	High	CoMeTa|DIANA|ElMMo3|MBStar|MirAncesTar|MirMAP|RepTar|RNAhybrid
NFE2L1	Q9Y5Q3		hsa-miR-1248	0.23343	8	High	CoMeTa|DIANA|ElMMo3|MirAncesTar|miRDB|MirMAP|MirTar|RepTar
MAFB	Q9NUJ1		hsa-miR-1248	0.233041	9	High	CoMeTa|DIANA|ElMMo3|MirAncesTar|miRDB|MirMAP|Mirza-G|RNAhybrid|TargetSpy
ABHD10	Q8N1S5		hsa-miR-1248	0.232723	10	High	DIANA|ElMMo3|MBStar|MirAncesTar|miRDB|MirMAP|Mirza-G|RepTar|RNAhybrid|TargetSpy
SLC39A11	Q14993		hsa-miR-1248	0.232712	11	High	BiTargeting|CoMeTa|DIANA|ElMMo3|MBStar|MirAncesTar|miRDB|MirMAP|Mirza-G|RepTar|RNAhybrid
COL19A1	P30559		hsa-miR-1248	0.232677	10	High	DIANA|ElMMo3|MBStar|MirAncesTar|miRDB|MirMAP|MirSNP|MirTar|Mirza-G|TargetSpy
OXTR	O14753		hsa-miR-1248	0.232604	10	High	CoMeTa|DIANA|ElMMo3|MirAncesTar|miRDB|MirMAP|MirSNP|Mirza-G|RepTar|RNAhybrid
OVOL1	P51114		hsa-miR-1248	0.232254	7	High	CoMeTa|DIANA|ElMMo3|MBStar|MirAncesTar|MirMAP|RNAhybrid
FXR1	Q9H7U1		hsa-miR-1248	0.232084	9	High	CoMeTa|DIANA|ElMMo3|MBStar|MirAncesTar|miRDB|MirMAP|Mirza-G|RNAhybrid
CCSER2	Q92851		hsa-miR-1248	0.232078	9	High	CoMeTa|DIANA|ElMMo3|MBStar|MirAncesTar|miRDB|MirMAP|RNAhybrid|TargetSpy
CASP10	Q9H0M5		hsa-miR-1248	0.232059	8	High	DIANA|ElMMo3|MirAncesTar|miRDB|MirMAP|MirTar|RNAhybrid|TargetSpy
ZNF700	Q15836		hsa-miR-1248	0.231947	7	High	CoMeTa|DIANA|ElMMo3|MirAncesTar|MirMAP|RepTar|RNA22
VAMP3	Q8N8I0		hsa-miR-1248	0.23175	11	High	DIANA|ElMMo3|MBStar|MirAncesTar|miRDB|MirMAP|MirSNP|Mirza-G|RepTar|RNAhybrid|TargetSpy
SAMD12	Q8NB78		hsa-miR-1248	0.231551	11	High	DIANA|ElMMo3|MBStar|MirAncesTar|miRDB|MirMAP|MirTar|Mirza-G|RepTar|RNAhybrid|TargetSpy
KDM1B	P22059		hsa-miR-1248	0.231418	8	High	CoMeTa|Cupid|DIANA|MBStar|MirAncesTar|MirMAP|Mirza-G|RNAhybrid
OSBP	Q70HW3		hsa-miR-1248	0.231395	11	High	BiTargeting|ElMMo3|MBStar|MirAncesTar|miRDB|MirMAP|MirSNP|Mirza-G|RepTar|RNAhybrid|TargetSpy
SLC25A26	O60861		hsa-miR-1248	0.231369	9	High	CoMeTa|DIANA|ElMMo3|MBStar|MirAncesTar|miRDB|MirMAP|RepTar|RNAhybrid
GAS7	O14524		hsa-miR-1248	0.231098	9	High	CoMeTa|DIANA|ElMMo3|MirAncesTar|miRDB|MirMAP|RepTar|RNAhybrid|TargetSpy
NEMP1	Q8WWC4		hsa-miR-1248	0.231067	9	High	DIANA|ElMMo3|MBStar|MirAncesTar|miRDB|MirMAP|MirTar|RNAhybrid|TargetSpy
MAIP1	P48200		hsa-miR-1248	0.231063	10	High	BiTargeting|CoMeTa|DIANA|ElMMo3|MBStar|MirAncesTar|miRDB|MirMAP|Mirza-G|RNAhybrid
IREB2	Q9NX76		hsa-miR-1248	0.230902	7	High	CoMeTa|DIANA|ElMMo3|MirAncesTar|miRDB|MirMAP|Mirza-G
CMTM6	P14060		hsa-miR-1248	0.230799	11	High	BiTargeting|CoMeTa|DIANA|ElMMo3|MirAncesTar|miRDB|MirMAP|Mirza-G|RepTar|RNA22|RNAhybrid
HSD3B1	O95715		hsa-miR-1248	0.230699	10	High	CoMeTa|DIANA|ElMMo3|MirAncesTar|miRDB|MirMAP|MirSNP|Mirza-G|RNAhybrid|TargetSpy
CXCL14	Q9NPI0		hsa-miR-1248	0.230471	8	High	ElMMo3|MirAncesTar|miRDB|MirMAP|Mirza-G|PACCMIT|RepTar|RNAhybrid
TMEM138	Q15788		hsa-miR-1248	0.230422	9	High	CoMeTa|DIANA|ElMMo3|MBStar|MirAncesTar|miRDB|MirMAP|RNAhybrid|TargetSpy
NCOA1	P13987		hsa-miR-1248	0.230402	9	High	BiTargeting|CoMeTa|DIANA|ElMMo3|MBStar|MirAncesTar|miRDB|MirMAP|RNAhybrid
CD59	Q5T200		hsa-miR-1248	0.230301	11	High	DIANA|ElMMo3|MBStar|MirAncesTar|miRDB|MirMAP|MirSNP|MirTar|Mirza-G|RepTar|RNAhybrid
ZC3H13	P49418		hsa-miR-1248	0.23009	9	High	BiTargeting|CoMeTa|ElMMo3|MirAncesTar|miRDB|MirMAP|MirSNP|RepTar|RNAhybrid
AMPH	Q96QE2		hsa-miR-1248	0.230036	8	High	DIANA|ElMMo3|MBStar|MirAncesTar|miRDB|MirMAP|Mirza-G|RepTar
SLC2A13	Q12906		hsa-miR-1248	0.22999	9	High	BiTargeting|CoMeTa|DIANA|ElMMo3|MBStar|MirAncesTar|miRDB|MirMAP|RNAhybrid
ILF3	Q9Y5Y7		hsa-miR-1248	0.229941	11	High	CoMeTa|DIANA|ElMMo3|MBStar|MirAncesTar|miRDB|MirMAP|MirSNP|Mirza-G|RNAhybrid|TargetSpy
LYVE1	P61601		hsa-miR-1248	0.229754	10	High	CoMeTa|DIANA|ElMMo3|MBStar|MirAncesTar|miRDB|MirMAP|Mirza-G|RepTar|RNAhybrid
NCALD	A6H8Y1		hsa-miR-1248	0.229663	9	High	Cupid|DIANA|ElMMo3|MirAncesTar|miRDB|MirMAP|Mirza-G|RNAhybrid|TargetSpy
BDP1	Q2M3T9		hsa-miR-1248	0.229481	8	High	CoMeTa|ElMMo3|MirAncesTar|miRDB|MirMAP|MirTar|RNAhybrid|TargetSpy
HYAL4	Q16647		hsa-miR-1248	0.22948	10	High	ElMMo3|MBStar|MirAncesTar|miRDB|MirMAP|MirSNP|MirTar|Mirza-G|RepTar|TargetSpy
PTGIS	Q9UPT6		hsa-miR-1248	0.229429	9	High	CoMeTa|DIANA|ElMMo3|MBStar|MirAncesTar|miRDB|MirMAP|PACCMIT|RNAhybrid
MAPK8IP3	Q8TE57		hsa-miR-1248	0.229316	10	High	DIANA|ElMMo3|MBStar|MirAncesTar|miRDB|MirMAP|MirTar|RepTar|RNAhybrid|TargetSpy
ADAMTS16	Q9BX73		hsa-miR-1248	0.229269	9	High	BiTargeting|DIANA|ElMMo3|MBStar|MirAncesTar|miRDB|MirMAP|Mirza-G|RepTar
TM2D2	Q6UWY0		hsa-miR-1248	0.228858	10	High	DIANA|ElMMo3|MBStar|MirAncesTar|miRDB|MirMAP|MirTar|Mirza-G|RNAhybrid|TargetSpy
ARSK	P49721		hsa-miR-1248	0.228627	9	High	CoMeTa|DIANA|ElMMo3|MBStar|MirAncesTar|miRDB|MirMAP|MirTar|RNAhybrid
PSMB2	P56703		hsa-miR-1248	0.228589	10	High	BiTargeting|DIANA|ElMMo3|MirAncesTar|miRDB|MirMAP|MirSNP|Mirza-G|RepTar|TargetSpy
WNT3	Q9UK61		hsa-miR-1248	0.22853	7	High	CoMeTa|MBStar|MirAncesTar|MirMAP|Mirza-G|RepTar|RNAhybrid
FAM208A	Q9BY43		hsa-miR-1248	0.228512	11	High	BiTargeting|CoMeTa|DIANA|ElMMo3|MBStar|MirAncesTar|miRDB|MirMAP|MirSNP|Mirza-G|RNAhybrid
CHMP4A	P18206		hsa-miR-1248	0.228508	9	High	DIANA|ElMMo3|MBStar|MirAncesTar|miRDB|MirMAP|MirTar|RNAhybrid|TargetSpy
VCL	Q9BW04		hsa-miR-1248	0.228495	12	High	DIANA|ElMMo3|MBStar|MirAncesTar|miRDB|MirMAP|MirSNP|Mirza-G|RepTar|RNA22|RNAhybrid|TargetSpy
C1orf116	O94916		hsa-miR-1248	0.228184	7	High	CoMeTa|Cupid|DIANA|MBStar|MirAncesTar|MirMAP|RNAhybrid
NFAT5	Q92766		hsa-miR-1248	0.228153	9	High	DIANA|ElMMo3|MBStar|MirAncesTar|miRDB|MirMAP|MirTar|Mirza-G|RNAhybrid
RREB1	P13945		hsa-miR-1248	0.228146	10	High	CoMeTa|DIANA|ElMMo3|MBStar|MirAncesTar|miRDB|MirMAP|Mirza-G|RepTar|RNAhybrid
ADRB3	O75363		hsa-miR-1248	0.227904	11	High	CoMeTa|DIANA|ElMMo3|MBStar|MirAncesTar|miRDB|MirMAP|MirSNP|Mirza-G|RepTar|RNAhybrid
BCAS1	Q69YW2		hsa-miR-1248	0.227656	10	High	DIANA|ElMMo3|MBStar|MirAncesTar|miRDB|MirMAP|MirSNP|RepTar|RNA22|TargetSpy
STUM	Q9BR77		hsa-miR-1248	0.227617	11	High	DIANA|ElMMo3|MBStar|MirAncesTar|miRDB|MirMAP|MirSNP|MirTar|Mirza-G|RNAhybrid|TargetSpy
CCDC77	Q9NUP9		hsa-miR-1248	0.22747	8	High	CoMeTa|DIANA|ElMMo3|MBStar|MirAncesTar|miRDB|MirMAP|RepTar
LIN7C	P30408		hsa-miR-1248	0.227365	10	High	DIANA|ElMMo3|MBStar|MirAncesTar|miRDB|MirMAP|MirSNP|Mirza-G|RNAhybrid|TargetSpy
TM4SF1	P55273		hsa-miR-1248	0.227341	8	High	CoMeTa|DIANA|ElMMo3|MirAncesTar|miRDB|MirMAP|Mirza-G|RNAhybrid
CDKN2D	P12259		hsa-miR-1248	0.22725	9	High	CoMeTa|ElMMo3|MBStar|MirAncesTar|miRDB|MirTar|Mirza-G|RNA22|RNAhybrid
F5	Q6ULP2		hsa-miR-1248	0.227119	7	High	Cupid|DIANA|MirAncesTar|MirMAP|Mirza-G|RepTar|RNAhybrid
AFTPH	Q14031		hsa-miR-1248	0.227043	9	High	CoMeTa|DIANA|ElMMo3|MBStar|MirAncesTar|miRDB|MirMAP|Mirza-G|RNAhybrid
COL4A6	Q5T1S8		hsa-miR-1248	0.227025	9	High	DIANA|ElMMo3|MirAncesTar|miRDB|MirMAP|MirTar|Mirza-G|RepTar|RNA22
NCMAP	P09038		hsa-miR-1248	0.227	9	High	DIANA|ElMMo3|MBStar|MirAncesTar|miRDB|MirMAP|MirSNP|MirTar|Mirza-G
FGF2	P49756		hsa-miR-1248	0.226894	6	High	CoMeTa|DIANA|ElMMo3|MirAncesTar|MirMAP|RNAhybrid
RBM25	Q13485		hsa-miR-1248	0.226476	8	High	CoMeTa|DIANA|ElMMo3|MBStar|MirAncesTar|MirMAP|Mirza-G|RNAhybrid
SMAD4	P35367		hsa-miR-1248	0.226464	11	High	DIANA|ElMMo3|MBStar|MirAncesTar|miRDB|MirMAP|MirSNP|MirTar|Mirza-G|RNAhybrid|TargetSpy
HRH1	Q9UN67		hsa-miR-1248	0.226279	10	High	DIANA|ElMMo3|MirAncesTar|miRDB|MirMAP|MirSNP|MirTar|Mirza-G|RepTar|RNAhybrid
PCDHB10	Q8NHV5		hsa-miR-1248	0.226198	7	High	Cupid|DIANA|ElMMo3|MBStar|MirAncesTar|MirMAP|RNAhybrid
C16orf52	Q13619		hsa-miR-1248	0.226128	7	High	CoMeTa|DIANA|MBStar|MirAncesTar|MirMAP|RepTar|RNAhybrid
CUL4A	Q9H2F9		hsa-miR-1248	0.226071	9	High	CoMeTa|DIANA|ElMMo3|MirAncesTar|miRDB|MirMAP|Mirza-G|RNAhybrid|TargetSpy
CCDC68	Q2TAA5		hsa-miR-1248	0.225948	11	High	DIANA|ElMMo3|MBStar|MirAncesTar|miRDB|MirMAP|MirSNP|MirTar|Mirza-G|RNAhybrid|TargetSpy
ALG11	Q96HN2		hsa-miR-1248	0.225925	10	High	CoMeTa|DIANA|ElMMo3|MBStar|MirAncesTar|miRDB|MirMAP|Mirza-G|RepTar|RNAhybrid
AHCYL2	Q9NWK9		hsa-miR-1248	0.225899	8	High	CoMeTa|DIANA|MBStar|MirAncesTar|MirMAP|Mirza-G|RNA22|RNAhybrid
ZNHIT6	Q6NYC1		hsa-miR-1248	0.225602	10	High	DIANA|ElMMo3|MBStar|MirAncesTar|miRDB|MirMAP|MirSNP|Mirza-G|RNAhybrid|TargetSpy
JMJD6	Q08345		hsa-miR-1248	0.225592	9	High	CoMeTa|DIANA|ElMMo3|MirAncesTar|miRDB|MirMAP|MirSNP|RepTar|RNAhybrid
DDR1	Q9HCP0		hsa-miR-1248	0.225405	10	High	CoMeTa|DIANA|ElMMo3|MBStar|MirAncesTar|miRDB|MirMAP|Mirza-G|RepTar|RNAhybrid
CSNK1G1	O75063		hsa-miR-1248	0.225374	10	High	DIANA|ElMMo3|MBStar|MirAncesTar|miRDB|MirMAP|MirTar|Mirza-G|RepTar|RNA22
FAM20B	Q9UJP4		hsa-miR-1248	0.225366	10	High	DIANA|ElMMo3|MirAncesTar|miRDB|MirMAP|MirSNP|Mirza-G|RNA22|RNAhybrid|TargetSpy
KLHL21	P07196		hsa-miR-1248	0.225244	8	High	CoMeTa|ElMMo3|MirAncesTar|miRDB|MirTar|Mirza-G|RepTar|RNAhybrid
NEFL	P17081		hsa-miR-1248	0.225064	8	High	CoMeTa|DIANA|ElMMo3|MBStar|MirAncesTar|MirMAP|RNAhybrid|TargetSpy
RHOQ	Q9P2N5		hsa-miR-1248	0.225063	8	High	DIANA|ElMMo3|MBStar|MirAncesTar|miRDB|MirMAP|Mirza-G|TargetSpy
RBM27	Q86V85		hsa-miR-1248	0.225059	9	High	DIANA|ElMMo3|MBStar|MirAncesTar|miRDB|MirMAP|MirSNP|MirTar|Mirza-G
GPR180	O15060		hsa-miR-1248	0.2249	9	High	DIANA|ElMMo3|MirAncesTar|miRDB|MirMAP|MirSNP|MirTar|Mirza-G|TargetSpy
ZBTB39	Q14444		hsa-miR-1248	0.224867	6	High	CoMeTa|ElMMo3|MBStar|MirAncesTar|RepTar|RNAhybrid
CAPRIN1	Q8TDD5		hsa-miR-1248	0.224867	7	High	CoMeTa|DIANA|MBStar|MirAncesTar|MirMAP|PACCMIT|RNAhybrid
MCOLN3	O00767		hsa-miR-1248	0.224702	7	High	BiTargeting|CoMeTa|ElMMo3|MBStar|MirAncesTar|MirMAP|RepTar
SCD	Q9Y4K1		hsa-miR-1248	0.224612	6	High	CoMeTa|DIANA|ElMMo3|MirAncesTar|PACCMIT|RNAhybrid
CRYBG1	P60033		hsa-miR-1248	0.224458	8	High	CoMeTa|DIANA|ElMMo3|MirAncesTar|miRDB|MirMAP|MirTar|RNAhybrid
CD81	P10912		hsa-miR-1248	0.224351	9	High	CoMeTa|DIANA|ElMMo3|MBStar|MirAncesTar|miRDB|MirMAP|Mirza-G|RNAhybrid
GHR	Q8IXF0		hsa-miR-1248	0.224302	9	High	DIANA|ElMMo3|MBStar|MirAncesTar|miRDB|MirMAP|MirTar|Mirza-G|RNAhybrid
NPAS3	Q96PF2		hsa-miR-1248	0.224206	8	High	CoMeTa|DIANA|ElMMo3|MirAncesTar|miRDB|MirMAP|PACCMIT|RNAhybrid
TSSK2	P15813		hsa-miR-1248	0.224178	11	High	CoMeTa|DIANA|ElMMo3|MBStar|MirAncesTar|miRDB|MirMAP|Mirza-G|RNA22|RNAhybrid|TargetSpy
CD1D	P42261		hsa-miR-1248	0.224104	9	High	CoMeTa|DIANA|ElMMo3|MBStar|MirAncesTar|miRDB|MirMAP|RepTar|RNAhybrid
GRIA1	Q86VZ6		hsa-miR-1248	0.224021	10	High	BiTargeting|ElMMo3|MBStar|MirAncesTar|miRDB|MirMAP|Mirza-G|PACCMIT|RepTar|RNAhybrid
JAZF1	Q14344		hsa-miR-1248	0.224014	9	High	DIANA|ElMMo3|MBStar|MirAncesTar|miRDB|MirMAP|Mirza-G|RNAhybrid|TargetSpy
GNA13	Q99259		hsa-miR-1248	0.223939	9	High	CoMeTa|DIANA|ElMMo3|MirAncesTar|miRDB|MirMAP|Mirza-G|RepTar|RNAhybrid
GAD1	Q16568		hsa-miR-1248	0.223877	9	High	CoMeTa|DIANA|ElMMo3|MBStar|MirAncesTar|miRDB|MirMAP|Mirza-G|TargetSpy
CARTPT	P05106		hsa-miR-1248	0.223876	10	High	CoMeTa|DIANA|ElMMo3|MBStar|MirAncesTar|miRDB|MirMAP|Mirza-G|RNAhybrid|TargetSpy
ITGB3	Q96BD5		hsa-miR-1248	0.223874	8	High	BiTargeting|CoMeTa|DIANA|ElMMo3|MirAncesTar|MirMAP|RepTar|RNAhybrid
PHF21A	Q92569		hsa-miR-1248	0.223711	10	High	BiTargeting|CoMeTa|DIANA|ElMMo3|MirAncesTar|miRDB|MirMAP|Mirza-G|RepTar|RNA22
PIK3R3	Q86XK2		hsa-miR-1248	0.223348	7	High	CoMeTa|DIANA|ElMMo3|MBStar|MirAncesTar|MirMAP|RNAhybrid
FBXO11	Q92922		hsa-miR-1248	0.223234	8	High	CoMeTa|DIANA|ElMMo3|MirAncesTar|miRDB|MirMAP|MirSNP|Mirza-G
SMARCC1	A7MD48		hsa-miR-1248	0.223172	9	High	DIANA|ElMMo3|MBStar|MirAncesTar|miRDB|MirMAP|Mirza-G|RepTar|TargetSpy
SRRM4	Q13127		hsa-miR-1248	0.223139	9	High	Cupid|DIANA|ElMMo3|MBStar|MirAncesTar|miRDB|MirMAP|Mirza-G|RNAhybrid
REST	Q6BDS2		hsa-miR-1248	0.223107	10	High	DIANA|ElMMo3|MBStar|MirAncesTar|miRDB|MirMAP|MirSNP|Mirza-G|RepTar|RNAhybrid
UHRF1BP1	Q15743		hsa-miR-1248	0.2231	11	High	DIANA|ElMMo3|MBStar|MirAncesTar|miRDB|MirMAP|MirSNP|Mirza-G|RepTar|RNAhybrid|TargetSpy
GPR68	Q9UK23		hsa-miR-1248	0.223076	9	High	DIANA|ElMMo3|MirAncesTar|miRDB|MirMAP|Mirza-G|PACCMIT|RepTar|RNAhybrid
NAGPA	P68400		hsa-miR-1248	0.222997	9	High	CoMeTa|DIANA|ElMMo3|MirAncesTar|miRDB|MirMAP|Mirza-G|RepTar|RNAhybrid
CSNK2A1	Q9BZA8		hsa-miR-1248	0.222966	9	High	CoMeTa|DIANA|ElMMo3|MirAncesTar|miRDB|MirMAP|Mirza-G|RNAhybrid|TargetSpy
PCDH11Y	Q9NUV7		hsa-miR-1248	0.222876	9	High	BiTargeting|CoMeTa|DIANA|ElMMo3|MirAncesTar|miRDB|MirMAP|RepTar|TargetSpy
SPTLC3	O76080		hsa-miR-1248	0.222817	7	High	CoMeTa|DIANA|ElMMo3|MBStar|MirAncesTar|MirMAP|RNAhybrid
ZFAND5	Q9NVA2		hsa-miR-1248	0.222769	10	High	DIANA|ElMMo3|MBStar|MirAncesTar|miRDB|MirMAP|Mirza-G|RepTar|RNAhybrid|TargetSpy
2017-09-11	Q2KHT4		hsa-miR-1248	0.222649	9	High	CoMeTa|DIANA|MBStar|MirAncesTar|miRDB|MirMAP|MirTar|Mirza-G|RNAhybrid
GSG1	Q15048		hsa-miR-1248	0.222591	9	High	CoMeTa|ElMMo3|MBStar|MirAncesTar|miRDB|MirMAP|PACCMIT|RepTar|RNAhybrid
LRRC14	P55786		hsa-miR-1248	0.222347	6	High	CoMeTa|Cupid|ElMMo3|MirAncesTar|MirMAP|RNAhybrid
NPEPPS	Q7L4I2		hsa-miR-1248	0.2223	7	High	Cupid|DIANA|MBStar|MirAncesTar|MirMAP|Mirza-G|RNAhybrid
RSRC2	P30988		hsa-miR-1248	0.222273	9	High	CoMeTa|DIANA|ElMMo3|MBStar|MirAncesTar|miRDB|MirMAP|Mirza-G|RNAhybrid
CALCR	Q14872		hsa-miR-1248	0.222175	10	High	BiTargeting|CoMeTa|DIANA|ElMMo3|MirAncesTar|miRDB|MirMAP|Mirza-G|RepTar|RNA22
MTF1	Q9H792		hsa-miR-1248	0.222149	9	High	DIANA|ElMMo3|MirAncesTar|miRDB|MirMAP|MirSNP|RepTar|RNAhybrid|TargetSpy
PEAK1	P41220		hsa-miR-1248	0.222059	9	High	CoMeTa|DIANA|ElMMo3|MBStar|MirAncesTar|miRDB|MirMAP|Mirza-G|RepTar
RGS2	Q5W0N0		hsa-miR-1248	0.221964	10	High	DIANA|ElMMo3|MBStar|MirAncesTar|miRDB|MirMAP|MirTar|Mirza-G|RNAhybrid|TargetSpy
C9orf57	Q15672		hsa-miR-1248	0.221958	7	High	Cupid|DIANA|MBStar|MirAncesTar|MirMAP|RepTar|RNAhybrid
TWIST1	Q9NRJ4		hsa-miR-1248	0.221863	10	High	BiTargeting|DIANA|ElMMo3|MBStar|MirAncesTar|miRDB|MirMAP|Mirza-G|RNAhybrid|TargetSpy
TULP4	Q8N5V2		hsa-miR-1248	0.221838	10	High	BiTargeting|DIANA|ElMMo3|MirAncesTar|miRDB|MirMAP|MirTar|Mirza-G|RepTar|RNAhybrid
NGEF	P05408		hsa-miR-1248	0.22182	9	High	CoMeTa|DIANA|ElMMo3|MirAncesTar|miRDB|MirMAP|Mirza-G|RepTar|RNAhybrid
SCG5	P78545		hsa-miR-1248	0.221796	10	High	DIANA|ElMMo3|MBStar|MirAncesTar|miRDB|MirMAP|MirTar|RNA22|RNAhybrid|TargetSpy
ELF3	Q9BYV9		hsa-miR-1248	0.22173	9	High	CoMeTa|DIANA|ElMMo3|MBStar|MirAncesTar|miRDB|MirMAP|RepTar|RNAhybrid
BACH2	Q15392		hsa-miR-1248	0.221531	9	High	BiTargeting|CoMeTa|DIANA|MirAncesTar|MirMAP|Mirza-G|RepTar|RNA22|RNAhybrid
DHCR24	O95365		hsa-miR-1248	0.221516	9	High	DIANA|ElMMo3|MirAncesTar|miRDB|MirMAP|MirTar|Mirza-G|RepTar|TargetSpy
ZBTB7A	P29323		hsa-miR-1248	0.221413	10	High	BiTargeting|CoMeTa|DIANA|ElMMo3|MirAncesTar|miRDB|MirMAP|Mirza-G|RNA22|RNAhybrid
EPHB2	P51793		hsa-miR-1248	0.221369	10	High	CoMeTa|DIANA|ElMMo3|MBStar|MirAncesTar|miRDB|MirMAP|Mirza-G|RepTar|RNAhybrid
CLCN4	Q13277		hsa-miR-1248	0.221349	9	High	DIANA|ElMMo3|MBStar|MirAncesTar|miRDB|MirMAP|MirSNP|RNAhybrid|TargetSpy
STX3	Q9UNP9		hsa-miR-1248	0.221298	10	High	CoMeTa|DIANA|ElMMo3|MirAncesTar|miRDB|MirMAP|Mirza-G|RepTar|RNA22|RNAhybrid
PPIE	Q96HC4		hsa-miR-1248	0.221259	7	High	Cupid|DIANA|MBStar|MirAncesTar|MirMAP|RepTar|RNAhybrid
PDLIM5	O95467		hsa-miR-1248	0.22118	9	High	BiTargeting|CoMeTa|ElMMo3|MBStar|MirAncesTar|miRDB|MirMAP|RepTar|RNAhybrid
GNAS	Q96L96		hsa-miR-1248	0.221142	8	High	CoMeTa|DIANA|ElMMo3|MirAncesTar|miRDB|MirMAP|Mirza-G|RepTar
ALPK3	Q8IWZ6		hsa-miR-1248	0.221007	11	High	DIANA|ElMMo3|MBStar|MirAncesTar|miRDB|MirMAP|MirSNP|Mirza-G|RepTar|RNAhybrid|TargetSpy
BBS7	Q6ZU67		hsa-miR-1248	0.220989	11	High	BiTargeting|DIANA|ElMMo3|MBStar|MirAncesTar|miRDB|MirMAP|Mirza-G|RepTar|RNAhybrid|TargetSpy
BEND4	P51504		hsa-miR-1248	0.220798	10	High	DIANA|ElMMo3|MBStar|MirAncesTar|miRDB|MirMAP|MirTar|Mirza-G|RNAhybrid|TargetSpy
ZNF80	Q96KN3		hsa-miR-1248	0.2206	7	High	CoMeTa|DIANA|ElMMo3|MirAncesTar|MirMAP|RepTar|RNAhybrid
PKNOX2	O43345		hsa-miR-1248	0.22057	9	High	CoMeTa|DIANA|MBStar|MirAncesTar|miRDB|MirMAP|MirTar|Mirza-G|RNAhybrid
ZNF208	Q9Y232		hsa-miR-1248	0.220531	9	High	CoMeTa|DIANA|ElMMo3|MirAncesTar|miRDB|MirMAP|Mirza-G|RepTar|RNAhybrid
CDYL	P25440		hsa-miR-1248	0.2205	9	High	CoMeTa|DIANA|ElMMo3|MBStar|MirAncesTar|miRDB|MirMAP|Mirza-G|RNAhybrid
BRD2	P12830		hsa-miR-1248	0.220474	10	High	DIANA|ElMMo3|MBStar|MirAncesTar|miRDB|MirMAP|MirTar|Mirza-G|RNAhybrid|TargetSpy
CDH1	P17252		hsa-miR-1248	0.220416	8	High	CoMeTa|DIANA|MBStar|MirAncesTar|MirMAP|Mirza-G|RepTar|RNAhybrid
PRKCA	Q9HCR9		hsa-miR-1248	0.220231	10	High	CoMeTa|ElMMo3|MBStar|MirAncesTar|miRDB|MirMAP|MirSNP|Mirza-G|RepTar|RNAhybrid
PDE11A	Q53G44		hsa-miR-1248	0.220221	11	High	DIANA|ElMMo3|MBStar|MirAncesTar|miRDB|MirMAP|MirTar|Mirza-G|RNA22|RNAhybrid|TargetSpy
IFI44L	Q5VT06		hsa-miR-1248	0.220204	7	High	CoMeTa|DIANA|MBStar|MirAncesTar|RepTar|RNA22|RNAhybrid
CEP350	Q6P179		hsa-miR-1248	0.220192	10	High	BiTargeting|CoMeTa|DIANA|ElMMo3|MBStar|MirAncesTar|miRDB|MirMAP|RepTar|RNAhybrid
ERAP2	Q8TEZ7		hsa-miR-1248	0.220161	10	High	DIANA|ElMMo3|MBStar|MirAncesTar|miRDB|MirMAP|MirSNP|Mirza-G|RepTar|TargetSpy
PAQR8	Q9UPM6		hsa-miR-1248	0.220156	10	High	BiTargeting|CoMeTa|ElMMo3|MBStar|MirAncesTar|miRDB|MirMAP|MirSNP|RepTar|RNAhybrid
LHX6	Q9Y625		hsa-miR-1248	0.220147	7	High	BiTargeting|CoMeTa|Cupid|ElMMo3|MirAncesTar|miRDB|MirSNP
GPC6	P51512		hsa-miR-1248	0.22007	9	High	CoMeTa|DIANA|ElMMo3|MirAncesTar|miRDB|MirMAP|MirSNP|Mirza-G|RepTar
MMP16	Q13555		hsa-miR-1248	0.219998	10	High	CoMeTa|DIANA|ElMMo3|MBStar|MirAncesTar|miRDB|MirMAP|Mirza-G|RepTar|RNAhybrid
CAMK2G	P16410		hsa-miR-1248	0.219984	9	High	CoMeTa|DIANA|ElMMo3|MBStar|MirAncesTar|miRDB|MirMAP|Mirza-G|RNAhybrid
CTLA4	Q13404		hsa-miR-1248	0.219892	8	High	CoMeTa|ElMMo3|MBStar|MirAncesTar|miRDB|MirMAP|Mirza-G|RNAhybrid
UBE2V1	P21579		hsa-miR-1248	0.219876	9	High	Cupid|DIANA|ElMMo3|MBStar|MirAncesTar|miRDB|MirMAP|Mirza-G|RNAhybrid
SYT1	P54849		hsa-miR-1248	0.21976	8	High	CoMeTa|DIANA|ElMMo3|MirAncesTar|miRDB|MirMAP|RepTar|RNAhybrid
EMP1	Q9H082		hsa-miR-1248	0.219671	8	High	DIANA|ElMMo3|MirAncesTar|miRDB|MirMAP|MirSNP|Mirza-G|RepTar
RAB33B	Q3SXP7		hsa-miR-1248	0.219599	9	High	DIANA|ElMMo3|MBStar|MirAncesTar|miRDB|MirMAP|MirSNP|RepTar|TargetSpy
KIAA1644	P56817		hsa-miR-1248	0.219569	10	High	CoMeTa|DIANA|ElMMo3|MBStar|MirAncesTar|miRDB|MirMAP|Mirza-G|RNAhybrid|TargetSpy
BACE1	P14867		hsa-miR-1248	0.219518	8	High	Cupid|DIANA|ElMMo3|MBStar|MirAncesTar|MirMAP|RNAhybrid|TargetSpy
GABRA1	P55010		hsa-miR-1248	0.219411	6	High	CoMeTa|MBStar|MirAncesTar|MirMAP|RepTar|RNAhybrid
EIF5	P07988		hsa-miR-1248	0.21936	10	High	DIANA|ElMMo3|MBStar|MirAncesTar|miRDB|MirMAP|MirTar|Mirza-G|RNAhybrid|TargetSpy
SFTPB	Q6ZU65		hsa-miR-1248	0.219346	9	High	DIANA|ElMMo3|MBStar|MirAncesTar|miRDB|MirMAP|MirTar|Mirza-G|RNAhybrid
UBN2	Q8WUI4		hsa-miR-1248	0.219218	10	High	CoMeTa|DIANA|ElMMo3|MBStar|MirAncesTar|miRDB|MirMAP|Mirza-G|RepTar|RNAhybrid
HDAC7	Q3T906		hsa-miR-1248	0.219199	8	High	CoMeTa|ElMMo3|MBStar|MirAncesTar|miRDB|MirMAP|Mirza-G|RNAhybrid
GNPTAB	P20339		hsa-miR-1248	0.21918	7	High	CoMeTa|DIANA|MBStar|MirAncesTar|MirMAP|Mirza-G|RNAhybrid
RAB5A	P43354		hsa-miR-1248	0.219112	9	High	CoMeTa|DIANA|ElMMo3|MBStar|MirAncesTar|miRDB|MirMAP|Mirza-G|RNAhybrid
NR4A2	O15156		hsa-miR-1248	0.219099	10	High	CoMeTa|DIANA|MirAncesTar|miRDB|MirMAP|MirSNP|Mirza-G|RepTar|RNA22|RNAhybrid
ZBTB7B	Q9NY59		hsa-miR-1248	0.219094	10	High	CoMeTa|DIANA|ElMMo3|MirAncesTar|miRDB|MirMAP|MirSNP|Mirza-G|RepTar|RNAhybrid
SMPD3	O15173		hsa-miR-1248	0.218992	10	High	DIANA|ElMMo3|MBStar|MirAncesTar|miRDB|MirMAP|MirTar|Mirza-G|RNAhybrid|TargetSpy
PGRMC2	Q9H116		hsa-miR-1248	0.218721	8	High	Cupid|DIANA|ElMMo3|MirAncesTar|miRDB|MirMAP|Mirza-G|RepTar
GZF1	Q8IUK5		hsa-miR-1248	0.218714	9	High	DIANA|ElMMo3|MBStar|MirAncesTar|miRDB|MirMAP|PACCMIT|RNAhybrid|TargetSpy
PLXDC1	Q8NF91		hsa-miR-1248	0.218709	11	High	BiTargeting|DIANA|ElMMo3|MBStar|MirAncesTar|miRDB|MirMAP|Mirza-G|RepTar|RNAhybrid|TargetSpy
SYNE1	Q8IU89		hsa-miR-1248	0.218554	9	High	DIANA|ElMMo3|MirAncesTar|MirMAP|MirSNP|Mirza-G|RepTar|RNAhybrid|TargetSpy
CERS3	Q9UH73		hsa-miR-1248	0.218532	8	High	Cupid|DIANA|ElMMo3|MirAncesTar|miRDB|MirMAP|Mirza-G|RNAhybrid
EBF1	O43516		hsa-miR-1248	0.218513	8	High	CoMeTa|ElMMo3|MBStar|MirAncesTar|miRDB|MirMAP|RepTar|RNAhybrid
WIPF1	O95084		hsa-miR-1248	0.218441	8	High	CoMeTa|ElMMo3|MirAncesTar|miRDB|MirMAP|Mirza-G|RepTar|RNAhybrid
PRSS23	Q8N5G2		hsa-miR-1248	0.218378	12	High	BiTargeting|DIANA|ElMMo3|MBStar|MirAncesTar|miRDB|MirMAP|Mirza-G|RepTar|RNA22|RNAhybrid|TargetSpy
TMEM57	O75487		hsa-miR-1248	0.218327	9	High	CoMeTa|DIANA|ElMMo3|MBStar|MirAncesTar|miRDB|MirMAP|Mirza-G|TargetSpy
GPC4	P48378		hsa-miR-1248	0.218296	10	High	DIANA|ElMMo3|MirAncesTar|miRDB|MirMAP|MirSNP|Mirza-G|RepTar|RNAhybrid|TargetSpy
RFX2	Q9NUL3		hsa-miR-1248	0.218239	10	High	DIANA|ElMMo3|MBStar|MirAncesTar|miRDB|MirMAP|MirSNP|Mirza-G|RNAhybrid|TargetSpy
STAU2	Q9BTU6		hsa-miR-1248	0.218211	8	High	CoMeTa|DIANA|ElMMo3|MirAncesTar|miRDB|MirMAP|RepTar|TargetSpy
PI4K2A	P51816		hsa-miR-1248	0.218191	9	High	CoMeTa|DIANA|ElMMo3|MBStar|MirAncesTar|miRDB|MirMAP|RepTar|RNAhybrid
AFF2	Q13224		hsa-miR-1248	0.218064	6	High	BiTargeting|CoMeTa|MBStar|MirAncesTar|MirMAP|RepTar
GRIN2B	O60902		hsa-miR-1248	0.218058	10	High	CoMeTa|DIANA|ElMMo3|MBStar|MirAncesTar|miRDB|MirMAP|Mirza-G|RNAhybrid|TargetSpy
SHOX2	Q9H7X2		hsa-miR-1248	0.217955	10	High	CoMeTa|DIANA|ElMMo3|MBStar|MirAncesTar|miRDB|MirMAP|MirSNP|Mirza-G|RNA22
C1orf115	O43684		hsa-miR-1248	0.217616	7	High	CoMeTa|DIANA|MBStar|MirAncesTar|MirMAP|Mirza-G|RNAhybrid
BUB3	O15409		hsa-miR-1248	0.21756	9	High	DIANA|ElMMo3|MBStar|MirAncesTar|miRDB|MirMAP|MirTar|Mirza-G|RNAhybrid
FOXP2	Q9BWU1		hsa-miR-1248	0.217495	7	High	CoMeTa|DIANA|ElMMo3|MBStar|MirAncesTar|MirMAP|RNAhybrid
CDK19	P02724		hsa-miR-1248	0.217373	9	High	CoMeTa|DIANA|ElMMo3|MBStar|MirAncesTar|miRDB|MirMAP|Mirza-G|RNAhybrid
GYPA	Q8TCQ1		hsa-miR-1248	0.217331	10	High	DIANA|ElMMo3|MBStar|MirAncesTar|miRDB|MirMAP|MirSNP|MirTar|Mirza-G|RNAhybrid
2017-03-01	Q14005		hsa-miR-1248	0.217315	9	High	BiTargeting|DIANA|ElMMo3|MBStar|MirAncesTar|MirMAP|PACCMIT|RepTar|RNAhybrid
IL16	Q9BPX5		hsa-miR-1248	0.217237	8	High	DIANA|ElMMo3|MirAncesTar|MirMAP|Mirza-G|PACCMIT|RepTar|RNAhybrid
ARPC5L	Q9NTZ6		hsa-miR-1248	0.217206	6	High	CoMeTa|MBStar|MirAncesTar|MirMAP|Mirza-G|RepTar
RBM12	Q9H756		hsa-miR-1248	0.216993	9	High	BiTargeting|CoMeTa|ElMMo3|MirAncesTar|miRDB|MirMAP|Mirza-G|RepTar|TargetSpy
LRRC19	Q86T26		hsa-miR-1248	0.216958	9	High	DIANA|ElMMo3|MBStar|MirAncesTar|miRDB|MirMAP|MirTar|Mirza-G|RepTar
TMPRSS11B	Q9NVZ3		hsa-miR-1248	0.216937	12	High	BiTargeting|DIANA|ElMMo3|MBStar|MirAncesTar|miRDB|MirMAP|Mirza-G|RepTar|RNA22|RNAhybrid|TargetSpy
NECAP2	Q96S97		hsa-miR-1248	0.21684	10	High	ElMMo3|MirAncesTar|miRDB|MirMAP|MirSNP|MirTar|Mirza-G|RepTar|RNAhybrid|TargetSpy
MYADM	Q9GZN0		hsa-miR-1248	0.216775	9	High	CoMeTa|DIANA|ElMMo3|MirAncesTar|miRDB|MirMAP|MirTar|Mirza-G|RNAhybrid
GPR88	Q9BQG2		hsa-miR-1248	0.21676	9	High	DIANA|ElMMo3|MBStar|MirAncesTar|miRDB|MirMAP|MirTar|Mirza-G|RNAhybrid
NUDT12	Q9Y6X8		hsa-miR-1248	0.216756	8	High	DIANA|ElMMo3|MirAncesTar|miRDB|MirMAP|MirTar|Mirza-G|TargetSpy
ZHX2	Q8IUC8		hsa-miR-1248	0.216674	10	High	DIANA|ElMMo3|MBStar|MirAncesTar|miRDB|MirMAP|MirSNP|RepTar|RNAhybrid|TargetSpy
GALNT13	Q9UJF2		hsa-miR-1248	0.216669	9	High	CoMeTa|DIANA|MBStar|MirAncesTar|MirMAP|Mirza-G|RepTar|RNA22|RNAhybrid
RASAL2	Q16539		hsa-miR-1248	0.216586	8	High	CoMeTa|DIANA|ElMMo3|MBStar|MirAncesTar|miRDB|MirMAP|MirSNP
MAPK14	Q9NWS1		hsa-miR-1248	0.216373	9	High	BiTargeting|CoMeTa|DIANA|ElMMo3|MBStar|MirAncesTar|MirMAP|RepTar|RNAhybrid
PARPBP	O15018		hsa-miR-1248	0.216178	8	High	BiTargeting|CoMeTa|DIANA|ElMMo3|MirAncesTar|MirMAP|MirSNP|RepTar
PDZD2	Q9P2B2		hsa-miR-1248	0.215898	10	High	BiTargeting|DIANA|ElMMo3|MirAncesTar|miRDB|MirMAP|Mirza-G|RepTar|RNA22|TargetSpy
PTGFRN	Q3SYG4		hsa-miR-1248	0.215788	9	High	CoMeTa|ElMMo3|MBStar|MirAncesTar|miRDB|MirMAP|MirTar|Mirza-G|RNAhybrid
BBS9	Q5VUR7		hsa-miR-1248	0.215644	9	High	BiTargeting|DIANA|ElMMo3|MBStar|MirAncesTar|MirMAP|RepTar|RNAhybrid|TargetSpy
ANKRD20A3	Q5VU43		hsa-miR-1248	0.215533	8	High	CoMeTa|DIANA|ElMMo3|MBStar|MirAncesTar|MirMAP|RNA22|RNAhybrid
PDE4DIP	P16383		hsa-miR-1248	0.215425	9	High	DIANA|ElMMo3|MirAncesTar|miRDB|MirMAP|Mirza-G|RepTar|RNAhybrid|TargetSpy
GCFC2	P10747		hsa-miR-1248	0.215407	9	High	DIANA|ElMMo3|MBStar|MirAncesTar|miRDB|MirMAP|Mirza-G|RepTar|TargetSpy
CD28	Q14596		hsa-miR-1248	0.215317	7	High	CoMeTa|DIANA|ElMMo3|MBStar|MirAncesTar|MirMAP|RNAhybrid
NBR1	Q9NQC7		hsa-miR-1248	0.215262	8	High	CoMeTa|DIANA|ElMMo3|MBStar|MirAncesTar|miRDB|MirMAP|RNAhybrid
CYLD	A3KN83		hsa-miR-1248	0.215126	7	High	CoMeTa|Cupid|DIANA|MBStar|MirAncesTar|MirMAP|Mirza-G
SBNO1	Q9P2N6		hsa-miR-1248	0.215126	10	High	CoMeTa|DIANA|ElMMo3|MBStar|MirAncesTar|miRDB|MirMAP|MirSNP|Mirza-G|RNAhybrid
KANSL3	Q9Y2D0		hsa-miR-1248	0.215058	9	High	DIANA|ElMMo3|MBStar|MirAncesTar|miRDB|MirMAP|Mirza-G|RepTar|RNAhybrid
CA5B	Q15768		hsa-miR-1248	0.21482	8	High	CoMeTa|ElMMo3|MirAncesTar|miRDB|MirMAP|Mirza-G|RNAhybrid|TargetSpy
EFNB3	Q9Y6K1		hsa-miR-1248	0.214727	11	High	BiTargeting|CoMeTa|DIANA|ElMMo3|MBStar|MirAncesTar|miRDB|MirMAP|Mirza-G|RepTar|RNAhybrid
DNMT3A	O15123		hsa-miR-1248	0.214713	9	High	DIANA|ElMMo3|MBStar|MirAncesTar|miRDB|MirMAP|Mirza-G|RNAhybrid|TargetSpy
ANGPT2	Q9HAW7		hsa-miR-1248	0.214661	10	High	DIANA|ElMMo3|MirAncesTar|miRDB|MirMAP|MirSNP|Mirza-G|RepTar|RNAhybrid|TargetSpy
UGT1A7	Q9NPB8		hsa-miR-1248	0.214458	9	High	DIANA|ElMMo3|MirAncesTar|miRDB|MirMAP|Mirza-G|PACCMIT|RNAhybrid|TargetSpy
GPCPD1	P08138		hsa-miR-1248	0.214452	10	High	CoMeTa|DIANA|ElMMo3|MBStar|MirAncesTar|miRDB|MirMAP|Mirza-G|RepTar|RNAhybrid
NGFR	Q9BXY0		hsa-miR-1248	0.214385	8	High	CoMeTa|DIANA|MBStar|MirAncesTar|MirMAP|MirSNP|RepTar|RNAhybrid
MAK16	Q2M2I8		hsa-miR-1248	0.21425	10	High	ElMMo3|MBStar|MirAncesTar|miRDB|MirMAP|MirSNP|Mirza-G|RepTar|RNAhybrid|TargetSpy
AAK1	Q86YS3		hsa-miR-1248	0.214116	11	High	BiTargeting|DIANA|ElMMo3|MBStar|MirAncesTar|miRDB|MirMAP|MirSNP|Mirza-G|RepTar|RNAhybrid
RAB11FIP4	Q6UXB0		hsa-miR-1248	0.213942	9	High	CoMeTa|DIANA|ElMMo3|MirAncesTar|miRDB|MirMAP|Mirza-G|RNAhybrid|TargetSpy
FAM131A	Q9UF56		hsa-miR-1248	0.213887	8	High	DIANA|ElMMo3|MBStar|MirAncesTar|miRDB|MirMAP|MirTar|Mirza-G
FBXL17	Q8NDH6		hsa-miR-1248	0.213592	10	High	DIANA|ElMMo3|MBStar|MirAncesTar|miRDB|MirMAP|MirSNP|Mirza-G|RNAhybrid|TargetSpy
ICA1L	Q9Y222		hsa-miR-1248	0.213587	8	High	CoMeTa|DIANA|ElMMo3|MBStar|MirAncesTar|miRDB|MirMAP|RNAhybrid
DMTF1	Q66K14		hsa-miR-1248	0.21344	9	High	CoMeTa|DIANA|ElMMo3|MirAncesTar|miRDB|MirMAP|Mirza-G|RepTar|RNAhybrid
TBC1D9B	Q76L83		hsa-miR-1248	0.213311	10	High	DIANA|ElMMo3|MBStar|MirAncesTar|miRDB|MirMAP|Mirza-G|PACCMIT|RepTar|RNAhybrid
ASXL2	Q9NYG2		hsa-miR-1248	0.213294	10	High	BiTargeting|DIANA|ElMMo3|MBStar|MirAncesTar|miRDB|MirMAP|MirSNP|Mirza-G|RNAhybrid
ZDHHC3	Q9H6S1		hsa-miR-1248	0.21323	10	High	DIANA|ElMMo3|MBStar|MirAncesTar|miRDB|MirMAP|MirTar|Mirza-G|RNAhybrid|TargetSpy
AZI2	Q8WXG1		hsa-miR-1248	0.213171	8	High	DIANA|ElMMo3|MirAncesTar|miRDB|MirMAP|MirTar|Mirza-G|TargetSpy
RSAD2	Q96GG9		hsa-miR-1248	0.213123	8	High	CoMeTa|DIANA|ElMMo3|MirAncesTar|MirMAP|Mirza-G|RNAhybrid|TargetSpy
DCUN1D1	O43439		hsa-miR-1248	0.213067	8	High	CoMeTa|DIANA|ElMMo3|MBStar|MirAncesTar|MirMAP|RepTar|RNAhybrid
CBFA2T2	O95153		hsa-miR-1248	0.21296	9	High	CoMeTa|DIANA|ElMMo3|MBStar|MirAncesTar|miRDB|MirMAP|RepTar|RNAhybrid
TSPOAP1	Q5HYK7		hsa-miR-1248	0.212869	10	High	DIANA|ElMMo3|MBStar|MirAncesTar|miRDB|MirMAP|MirSNP|Mirza-G|RNAhybrid|TargetSpy
SH3D19	Q02078		hsa-miR-1248	0.212767	7	High	CoMeTa|DIANA|MBStar|MirAncesTar|MirMAP|RepTar|RNAhybrid
MEF2A	P08575		hsa-miR-1248	0.212708	9	High	DIANA|MBStar|MirAncesTar|MirMAP|Mirza-G|PACCMIT|RepTar|RNA22|RNAhybrid
PTPRC	O95199		hsa-miR-1248	0.212688	10	High	DIANA|ElMMo3|MBStar|MirAncesTar|miRDB|MirMAP|Mirza-G|RepTar|RNAhybrid|TargetSpy
RCBTB2	P31645		hsa-miR-1248	0.212614	8	High	BiTargeting|DIANA|ElMMo3|MirAncesTar|miRDB|MirMAP|MirTar|Mirza-G
SLC6A4	P42858		hsa-miR-1248	0.212577	10	High	DIANA|ElMMo3|MBStar|MirAncesTar|miRDB|MirMAP|MirSNP|Mirza-G|RepTar|RNAhybrid
HTT	P19224		hsa-miR-1248	0.212565	10	High	DIANA|ElMMo3|MirAncesTar|miRDB|MirMAP|MirSNP|Mirza-G|RepTar|RNAhybrid|TargetSpy
UGT1A6	P61158		hsa-miR-1248	0.212389	6	High	CoMeTa|MBStar|MirAncesTar|miRDB|MirMAP|RNAhybrid
ACTR3	P02545		hsa-miR-1248	0.212385	11	High	BiTargeting|CoMeTa|DIANA|ElMMo3|MBStar|MirAncesTar|miRDB|MirMAP|Mirza-G|RNA22|RNAhybrid
LMNA	Q8NEP9		hsa-miR-1248	0.212189	10	High	DIANA|ElMMo3|MBStar|MirAncesTar|miRDB|MirMAP|MirSNP|MirTar|Mirza-G|RNAhybrid
ZNF555	Q96RL7		hsa-miR-1248	0.21201	8	High	CoMeTa|DIANA|ElMMo3|MirAncesTar|MirMAP|MirTar|Mirza-G|RNAhybrid
VPS13A	Q3YBR2		hsa-miR-1248	0.211966	8	High	DIANA|ElMMo3|MirAncesTar|miRDB|MirMAP|Mirza-G|RNAhybrid|TargetSpy
TBRG1	Q86U28		hsa-miR-1248	0.211687	9	High	DIANA|ElMMo3|MirAncesTar|miRDB|MirMAP|MirTar|Mirza-G|RepTar|RNAhybrid
ISCA2	Q5T0Z8		hsa-miR-1248	0.211563	8	High	DIANA|ElMMo3|MirAncesTar|miRDB|MirMAP|MirTar|Mirza-G|RNAhybrid
C6orf132	Q9NZB2		hsa-miR-1248	0.211547	5	High	CoMeTa|Cupid|MirAncesTar|PACCMIT|RNAhybrid
FAM120A	Q9NQV6		hsa-miR-1248	0.211284	9	High	DIANA|ElMMo3|MBStar|MirAncesTar|miRDB|MirMAP|PACCMIT|RepTar|RNAhybrid
PRDM10	Q9HB63		hsa-miR-1248	0.211244	9	High	DIANA|ElMMo3|MBStar|MirAncesTar|miRDB|MirMAP|MirTar|RepTar|RNAhybrid
NTN4	Q86WV1		hsa-miR-1248	0.211132	10	High	DIANA|ElMMo3|MBStar|MirAncesTar|miRDB|MirMAP|Mirza-G|RepTar|RNAhybrid|TargetSpy
SKAP1	O75751		hsa-miR-1248	0.21075	8	High	CoMeTa|DIANA|ElMMo3|MirAncesTar|miRDB|MirMAP|RepTar|RNAhybrid
SLC22A3	P51815		hsa-miR-1248	0.210619	9	High	CoMeTa|DIANA|ElMMo3|MirAncesTar|miRDB|MirMAP|Mirza-G|RNAhybrid|TargetSpy
ZNF75D	Q6Y7W6		hsa-miR-1248	0.210531	10	High	CoMeTa|DIANA|ElMMo3|MBStar|MirAncesTar|miRDB|MirMAP|MirSNP|Mirza-G|RNAhybrid
GIGYF2	Q687X5		hsa-miR-1248	0.21034	10	High	CoMeTa|DIANA|ElMMo3|MBStar|MirAncesTar|miRDB|MirMAP|Mirza-G|RNAhybrid|TargetSpy
STEAP4	Q9HBT7		hsa-miR-1248	0.210338	8	High	DIANA|ElMMo3|MirAncesTar|MirMAP|MirTar|Mirza-G|RepTar|RNAhybrid
ZNF287	Q9UKL0		hsa-miR-1248	0.210227	8	High	CoMeTa|DIANA|ElMMo3|MirAncesTar|miRDB|MirMAP|Mirza-G|RNAhybrid
RCOR1	O60268		hsa-miR-1248	0.210207	9	High	BiTargeting|DIANA|ElMMo3|MirAncesTar|miRDB|MirMAP|RepTar|RNAhybrid|TargetSpy
KIAA0513	A6NIM6		hsa-miR-1248	0.210204	9	High	DIANA|ElMMo3|MirAncesTar|miRDB|MirMAP|MirSNP|MirTar|Mirza-G|RNAhybrid
SLC15A5	P17301		hsa-miR-1248	0.21006	8	High	BiTargeting|CoMeTa|ElMMo3|MBStar|MirAncesTar|MirMAP|RepTar|RNAhybrid
ITGA2	Q92585		hsa-miR-1248	0.210011	10	High	DIANA|ElMMo3|MBStar|MirAncesTar|miRDB|MirMAP|MirSNP|Mirza-G|RepTar|TargetSpy
MAML1	Q96NW4		hsa-miR-1248	0.209945	7	High	CoMeTa|MBStar|MirAncesTar|MirMAP|MirSNP|Mirza-G|RNAhybrid
ANKRD27	P16220		hsa-miR-1248	0.209939	8	High	CoMeTa|DIANA|ElMMo3|MBStar|MirAncesTar|miRDB|MirMAP|RNAhybrid
CREB1	Q8WVD3		hsa-miR-1248	0.209936	6	High	CoMeTa|DIANA|MBStar|MirAncesTar|MirMAP|Mirza-G
RNF138	Q9Y5J6		hsa-miR-1248	0.209918	9	High	CoMeTa|DIANA|ElMMo3|MBStar|MirAncesTar|MirMAP|Mirza-G|RepTar|RNAhybrid
TIMM10B	Q92838		hsa-miR-1248	0.209885	7	High	CoMeTa|ElMMo3|MBStar|MirAncesTar|miRDB|MirMAP|RNAhybrid
EDA	Q96J42		hsa-miR-1248	0.209879	9	High	DIANA|ElMMo3|MBStar|MirAncesTar|miRDB|MirMAP|MirTar|Mirza-G|RNAhybrid
TXNDC15	Q9H165		hsa-miR-1248	0.209543	8	High	BiTargeting|CoMeTa|ElMMo3|MBStar|MirAncesTar|MirMAP|Mirza-G|RNAhybrid
BCL11A	P35408		hsa-miR-1248	0.20944	6	High	CoMeTa|DIANA|ElMMo3|MirAncesTar|MirMAP|TargetSpy
PTGER4	Q9C040		hsa-miR-1248	0.209187	7	High	Cupid|DIANA|MBStar|MirAncesTar|MirMAP|Mirza-G|RNAhybrid
TRIM2	Q9NRM1		hsa-miR-1248	0.209133	10	High	BiTargeting|DIANA|ElMMo3|MBStar|MirAncesTar|miRDB|MirMAP|MirSNP|Mirza-G|RNAhybrid
ENAM	Q9HCM2		hsa-miR-1248	0.209128	10	High	DIANA|ElMMo3|MBStar|MirAncesTar|miRDB|MirMAP|MirSNP|Mirza-G|RepTar|RNAhybrid
PLXNA4	O15527		hsa-miR-1248	0.209045	8	High	CoMeTa|ElMMo3|MBStar|MirAncesTar|MirMAP|MirTar|RNAhybrid|TargetSpy
OGG1	Q92529		hsa-miR-1248	0.208951	8	High	CoMeTa|ElMMo3|MBStar|MirAncesTar|miRDB|MirSNP|RepTar|RNAhybrid
SHC3	Q93063		hsa-miR-1248	0.208933	9	High	CoMeTa|DIANA|ElMMo3|MirAncesTar|miRDB|MirMAP|Mirza-G|RepTar|RNAhybrid
EXT2	P61764		hsa-miR-1248	0.208841	7	High	CoMeTa|DIANA|ElMMo3|MirAncesTar|MirMAP|RepTar|RNAhybrid
STXBP1	Q9Y2T6		hsa-miR-1248	0.208664	10	High	BiTargeting|DIANA|ElMMo3|MirAncesTar|miRDB|MirMAP|Mirza-G|RepTar|RNAhybrid|TargetSpy
GPR55	Q8WUN7		hsa-miR-1248	0.208505	8	High	DIANA|ElMMo3|MBStar|MirAncesTar|MirMAP|Mirza-G|PACCMIT|RepTar
UBTD2	Q9UPQ3		hsa-miR-1248	0.208237	8	High	CoMeTa|DIANA|MBStar|MirAncesTar|miRDB|MirMAP|MirTar|RNAhybrid
AGAP1	Q9HAW8		hsa-miR-1248	0.208194	10	High	DIANA|ElMMo3|MirAncesTar|miRDB|MirMAP|MirSNP|Mirza-G|RepTar|RNAhybrid|TargetSpy
UGT1A10	Q92598		hsa-miR-1248	0.208138	4	High	CoMeTa|Cupid|MirAncesTar|RNAhybrid
HSPH1	Q8NCT1		hsa-miR-1248	0.208099	9	High	DIANA|ElMMo3|MBStar|MirAncesTar|miRDB|MirMAP|MirTar|Mirza-G|TargetSpy
ARRDC4	Q8IWS0		hsa-miR-1248	0.208069	9	High	BiTargeting|Cupid|DIANA|MBStar|MirAncesTar|MirMAP|Mirza-G|RepTar|RNAhybrid
PHF6	P41181		hsa-miR-1248	0.207951	8	High	CoMeTa|DIANA|ElMMo3|MirAncesTar|miRDB|MirMAP|MirSNP|RNAhybrid
AQP2	O60656		hsa-miR-1248	0.207843	10	High	DIANA|ElMMo3|MirAncesTar|miRDB|MirMAP|MirSNP|Mirza-G|RepTar|RNAhybrid|TargetSpy
UGT1A9	Q8WWI5		hsa-miR-1248	0.207722	11	High	DIANA|ElMMo3|MBStar|MirAncesTar|miRDB|MirMAP|MirSNP|MirTar|Mirza-G|RNAhybrid|TargetSpy
SLC44A1	Q9UKZ4		hsa-miR-1248	0.207633	9	High	CoMeTa|DIANA|ElMMo3|MBStar|MirAncesTar|miRDB|MirMAP|MirSNP|Mirza-G
TENM1	Q01844		hsa-miR-1248	0.207513	4	High	CoMeTa|Cupid|MirAncesTar|RNAhybrid
EWSR1	Q13449		hsa-miR-1248	0.207505	8	High	ElMMo3|MBStar|MirAncesTar|miRDB|MirMAP|MirSNP|MirTar|RNAhybrid
LSAMP	Q9HAW9		hsa-miR-1248	0.207459	10	High	DIANA|ElMMo3|MirAncesTar|miRDB|MirMAP|MirSNP|Mirza-G|RepTar|RNAhybrid|TargetSpy
UGT1A8	Q9UPZ6		hsa-miR-1248	0.20738	6	High	CoMeTa|DIANA|ElMMo3|MBStar|MirAncesTar|miRDB
THSD7A	P52294		hsa-miR-1248	0.207317	6	High	Cupid|DIANA|MBStar|MirAncesTar|MirMAP|MirSNP
KPNA1	Q9Y4G8		hsa-miR-1248	0.207179	6	High	CoMeTa|DIANA|MirAncesTar|MirMAP|RepTar|RNAhybrid
RAPGEF2			hsa-miR-1248	0.207143	9	High	DIANA|ElMMo3|MBStar|MirAncesTar|miRDB|MirMAP|MirSNP|Mirza-G|TargetSpy
DMAC1	Q95460		hsa-miR-1248	0.207092	10	High	BiTargeting|DIANA|ElMMo3|MBStar|MirAncesTar|miRDB|MirMAP|MirSNP|RNA22|RNAhybrid
MR1	O75095		hsa-miR-1248	0.206985	10	High	ElMMo3|MBStar|MirAncesTar|miRDB|MirMAP|MirSNP|Mirza-G|RNA22|RNAhybrid|TargetSpy
MEGF6	Q9NYP7		hsa-miR-1248	0.206794	7	High	CoMeTa|DIANA|ElMMo3|MBStar|MirAncesTar|MirMAP|RNAhybrid
ELOVL5	P17936		hsa-miR-1248	0.206562	8	High	CoMeTa|DIANA|ElMMo3|MBStar|MirAncesTar|miRDB|MirMAP|RNAhybrid
IGFBP3	Q86XL3		hsa-miR-1248	0.206556	9	High	DIANA|ElMMo3|MBStar|MirAncesTar|miRDB|MirMAP|MirTar|RNAhybrid|TargetSpy
ANKLE2	Q68BL7		hsa-miR-1248	0.206509	8	High	CoMeTa|DIANA|ElMMo3|MBStar|MirAncesTar|miRDB|MirMAP|RepTar
OLFML2A	P19622		hsa-miR-1248	0.206487	9	High	CoMeTa|DIANA|ElMMo3|MBStar|MirAncesTar|miRDB|MirMAP|Mirza-G|TargetSpy
EN2	Q76N89		hsa-miR-1248	0.206456	9	High	DIANA|ElMMo3|MirAncesTar|miRDB|MirMAP|MirSNP|Mirza-G|RNAhybrid|TargetSpy
HECW1	P80192		hsa-miR-1248	0.206227	8	High	BiTargeting|DIANA|MBStar|MirAncesTar|miRDB|MirMAP|RepTar|RNAhybrid
MAP3K9	P41597		hsa-miR-1248	0.206092	10	High	DIANA|ElMMo3|MBStar|MirAncesTar|miRDB|MirMAP|MirSNP|Mirza-G|RepTar|RNAhybrid
CCR2	P14618		hsa-miR-1248	0.206047	8	High	BiTargeting|DIANA|ElMMo3|MirAncesTar|miRDB|MirMAP|MirSNP|RNAhybrid
PKM	Q9Y5R4		hsa-miR-1248	0.206045	9	High	BiTargeting|CoMeTa|DIANA|ElMMo3|MirAncesTar|miRDB|MirMAP|RepTar|RNAhybrid
HEMK1	P35575		hsa-miR-1248	0.206031	10	High	CoMeTa|DIANA|ElMMo3|MBStar|MirAncesTar|miRDB|MirMAP|Mirza-G|RepTar|RNAhybrid
G6PC	Q9UBP6		hsa-miR-1248	0.206013	10	High	BiTargeting|CoMeTa|DIANA|ElMMo3|MirAncesTar|miRDB|MirMAP|Mirza-G|RepTar|RNAhybrid
METTL1	Q9Y261		hsa-miR-1248	0.205953	10	High	DIANA|ElMMo3|MBStar|MirAncesTar|miRDB|MirMAP|Mirza-G|RepTar|RNAhybrid|TargetSpy
FOXA2	P31751		hsa-miR-1248	0.20595	11	High	BiTargeting|DIANA|ElMMo3|MirAncesTar|miRDB|MirMAP|MirSNP|Mirza-G|RepTar|RNAhybrid|TargetSpy
AKT2	Q6PK04		hsa-miR-1248	0.205704	9	High	DIANA|ElMMo3|MirAncesTar|miRDB|MirMAP|Mirza-G|RepTar|RNAhybrid|TargetSpy
CCDC137	P49116		hsa-miR-1248	0.205699	9	High	ElMMo3|MBStar|MirAncesTar|miRDB|MirTar|Mirza-G|RepTar|RNAhybrid|TargetSpy
NR2C2	Q9H0B8		hsa-miR-1248	0.205693	9	High	DIANA|ElMMo3|MirAncesTar|miRDB|MirMAP|Mirza-G|RepTar|RNAhybrid|TargetSpy
CRISPLD2	A1L020		hsa-miR-1248	0.205642	7	High	ElMMo3|MBStar|MirAncesTar|miRDB|Mirza-G|RNA22|TargetSpy
MEX3A	Q6ZU80		hsa-miR-1248	0.205632	8	High	ElMMo3|MirAncesTar|miRDB|MirMAP|MirTar|Mirza-G|RepTar|RNAhybrid
CEP128	P22309		hsa-miR-1248	0.205605	10	High	DIANA|ElMMo3|MirAncesTar|miRDB|MirMAP|MirSNP|Mirza-G|RepTar|RNAhybrid|TargetSpy
UGT1A1	Q99611		hsa-miR-1248	0.205553	9	High	CoMeTa|DIANA|ElMMo3|MBStar|MirAncesTar|miRDB|MirMAP|Mirza-G|RNAhybrid
SEPHS2	O60885		hsa-miR-1248	0.205547	6	High	Cupid|DIANA|MirAncesTar|MirMAP|RepTar|RNAhybrid
BRD4	Q9ULJ8		hsa-miR-1248	0.205502	9	High	CoMeTa|DIANA|ElMMo3|MBStar|MirAncesTar|miRDB|MirMAP|Mirza-G|RNAhybrid
PPP1R9A	Q9UJW7		hsa-miR-1248	0.205442	11	High	BiTargeting|DIANA|ElMMo3|MirAncesTar|miRDB|MirMAP|MirSNP|Mirza-G|RepTar|RNAhybrid|TargetSpy
ZNF229	Q96FA3		hsa-miR-1248	0.205355	7	High	CoMeTa|DIANA|ElMMo3|MirAncesTar|miRDB|MirMAP|Mirza-G
PELI1	Q05682		hsa-miR-1248	0.205309	7	High	CoMeTa|DIANA|MBStar|MirAncesTar|MirMAP|Mirza-G|RNAhybrid
CALD1	Q12996		hsa-miR-1248	0.205189	4	High	CoMeTa|Cupid|MirAncesTar|RNAhybrid
CSTF3	O15197		hsa-miR-1248	0.205153	7	High	DIANA|ElMMo3|MirAncesTar|miRDB|MirMAP|PACCMIT|RNAhybrid
EPHB6	Q9NXG0		hsa-miR-1248	0.205147	8	High	CoMeTa|DIANA|ElMMo3|MirAncesTar|miRDB|MirMAP|Mirza-G|RNAhybrid
CNTLN	Q9UP65		hsa-miR-1248	0.205102	9	High	CoMeTa|DIANA|ElMMo3|MirAncesTar|miRDB|MirMAP|Mirza-G|RNAhybrid|TargetSpy
PLA2G4C	Q1EHB4		hsa-miR-1248	0.205095	9	High	DIANA|ElMMo3|MBStar|MirAncesTar|miRDB|MirMAP|MirTar|RNAhybrid|TargetSpy
SLC5A12	Q6XE24		hsa-miR-1248	0.205072	8	High	CoMeTa|DIANA|ElMMo3|MBStar|MirAncesTar|miRDB|MirMAP|RNAhybrid
RBMS3	P35625		hsa-miR-1248	0.205048	7	High	CoMeTa|DIANA|ElMMo3|MirAncesTar|miRDB|MirMAP|Mirza-G
TIMP3	Q9ULV1		hsa-miR-1248	0.204979	7	High	BiTargeting|CoMeTa|DIANA|MBStar|MirAncesTar|MirMAP|RepTar
FZD4	Q9ULV0		hsa-miR-1248	0.204862	10	High	DIANA|ElMMo3|MBStar|MirAncesTar|miRDB|MirMAP|MirSNP|MirTar|RNAhybrid|TargetSpy
MYO5B	Q9UDX4		hsa-miR-1248	0.204787	7	High	CoMeTa|DIANA|ElMMo3|MirAncesTar|MirMAP|RNAhybrid|TargetSpy
SEC14L3	Q9UHB7		hsa-miR-1248	0.204695	9	High	CoMeTa|DIANA|ElMMo3|MBStar|MirAncesTar|miRDB|MirMAP|Mirza-G|RNAhybrid
AFF4	Q8NEN0		hsa-miR-1248	0.204647	8	High	DIANA|ElMMo3|MirAncesTar|miRDB|MirMAP|MirTar|Mirza-G|RNAhybrid
ARMC2	O75064		hsa-miR-1248	0.204639	10	High	CoMeTa|DIANA|ElMMo3|MBStar|MirAncesTar|miRDB|MirMAP|RepTar|RNA22|RNAhybrid
DENND4B	P22310		hsa-miR-1248	0.204627	10	High	ElMMo3|MBStar|MirAncesTar|miRDB|MirMAP|MirSNP|Mirza-G|RepTar|RNAhybrid|TargetSpy
UGT1A4	Q92541		hsa-miR-1248	0.204604	7	High	CoMeTa|ElMMo3|MBStar|MirAncesTar|miRDB|MirMAP|TargetSpy
RTF1	Q5T655		hsa-miR-1248	0.204595	9	High	DIANA|ElMMo3|MBStar|MirAncesTar|miRDB|MirMAP|MirTar|Mirza-G|RNAhybrid
CFAP58	Q9UPV9		hsa-miR-1248	0.204527	9	High	BiTargeting|DIANA|ElMMo3|MirAncesTar|MirMAP|Mirza-G|RepTar|RNAhybrid|TargetSpy
TRAK1	Q8N9K7		hsa-miR-1248	0.204338	10	High	DIANA|ElMMo3|MBStar|MirAncesTar|miRDB|MirMAP|MirSNP|Mirza-G|RNAhybrid|TargetSpy
KIAA1456	Q9H2E6		hsa-miR-1248	0.204303	7	High	CoMeTa|DIANA|ElMMo3|MirAncesTar|miRDB|MirMAP|RNAhybrid
SEMA6A	Q96GE6		hsa-miR-1248	0.204271	10	High	BiTargeting|DIANA|ElMMo3|MBStar|MirAncesTar|miRDB|MirMAP|Mirza-G|RepTar|RNAhybrid
CALML4	Q8TEW8		hsa-miR-1248	0.204214	9	High	BiTargeting|DIANA|MBStar|MirAncesTar|miRDB|MirMAP|MirTar|Mirza-G|RNAhybrid
PARD3B	Q08AH3		hsa-miR-1248	0.204047	10	High	DIANA|ElMMo3|MirAncesTar|miRDB|MirMAP|MirSNP|Mirza-G|RepTar|RNAhybrid|TargetSpy
ACSM2A	Q9H992		hsa-miR-1248	0.20403	6	High	CoMeTa|DIANA|ElMMo3|MirAncesTar|MirMAP|RNAhybrid
2017-03-07	P01127		hsa-miR-1248	0.204015	9	High	DIANA|ElMMo3|MBStar|MirAncesTar|miRDB|MirMAP|MirTar|RNAhybrid|TargetSpy
PDGFB	Q2QL34		hsa-miR-1248	0.203784	9	High	DIANA|ElMMo3|MBStar|MirAncesTar|miRDB|MirMAP|Mirza-G|RNAhybrid|TargetSpy
MPV17L	P49961		hsa-miR-1248	0.203766	8	High	DIANA|ElMMo3|MBStar|MirAncesTar|miRDB|MirMAP|RepTar|RNAhybrid
ENTPD1	Q03938		hsa-miR-1248	0.203604	9	High	DIANA|ElMMo3|MBStar|MirAncesTar|miRDB|MirMAP|MirTar|Mirza-G|RNAhybrid
ZNF90	Q9HBL0		hsa-miR-1248	0.203429	7	High	CoMeTa|DIANA|ElMMo3|MBStar|MirAncesTar|MirMAP|RNAhybrid
TNS1	Q8IZ21		hsa-miR-1248	0.203355	9	High	CoMeTa|DIANA|ElMMo3|MirAncesTar|miRDB|MirMAP|RNA22|RNAhybrid|TargetSpy
PHACTR4	Q9UKT8		hsa-miR-1248	0.203333	4	High	CoMeTa|ElMMo3|MirAncesTar|RepTar
FBXW2	Q86VQ1		hsa-miR-1248	0.203256	8	High	DIANA|ElMMo3|MBStar|MirAncesTar|MirMAP|Mirza-G|RNAhybrid|TargetSpy
GLCCI1	Q5VZ18		hsa-miR-1248	0.203076	11	High	BiTargeting|DIANA|ElMMo3|MirAncesTar|miRDB|MirMAP|MirSNP|Mirza-G|RepTar|RNA22|RNAhybrid
SHE	Q9NRR8		hsa-miR-1248	0.203068	8	High	CoMeTa|ElMMo3|MBStar|MirAncesTar|miRDB|MirMAP|MirSNP|RepTar
CDC42SE1	O43791		hsa-miR-1248	0.203053	6	High	Cupid|DIANA|MBStar|MirAncesTar|MirMAP|RNAhybrid
SPOP	Q14165		hsa-miR-1248	0.203017	10	High	DIANA|ElMMo3|MBStar|MirAncesTar|miRDB|MirMAP|MirSNP|Mirza-G|RepTar|RNAhybrid
MLEC	Q17RY0		hsa-miR-1248	0.203011	6	High	Cupid|DIANA|MirAncesTar|MirMAP|Mirza-G|RNAhybrid
CPEB4	O95232		hsa-miR-1248	0.202933	6	High	CoMeTa|DIANA|MBStar|MirAncesTar|MirMAP|RNAhybrid
LUC7L3	Q96PS8		hsa-miR-1248	0.20289	11	High	DIANA|ElMMo3|MBStar|MirAncesTar|miRDB|MirMAP|MirTar|Mirza-G|RNA22|RNAhybrid|TargetSpy
AQP10	Q4G0N8		hsa-miR-1248	0.202886	8	High	DIANA|ElMMo3|MirAncesTar|miRDB|MirMAP|MirSNP|Mirza-G|RNAhybrid
SLC9C1	Q9BS34		hsa-miR-1248	0.202854	10	High	ElMMo3|MBStar|MirAncesTar|miRDB|MirMAP|Mirza-G|RepTar|RNA22|RNAhybrid|TargetSpy
ZNF670	P31994		hsa-miR-1248	0.202749	9	High	CoMeTa|DIANA|ElMMo3|MBStar|MirAncesTar|MirMAP|RepTar|RNA22|RNAhybrid
FCGR2B	O15439		hsa-miR-1248	0.202728	8	High	DIANA|ElMMo3|MirAncesTar|miRDB|MirMAP|Mirza-G|RNAhybrid|TargetSpy
ABCC4	P32189		hsa-miR-1248	0.202686	10	High	DIANA|ElMMo3|MBStar|MirAncesTar|miRDB|MirMAP|MirSNP|Mirza-G|RNAhybrid|TargetSpy
GK	Q6IQ16		hsa-miR-1248	0.202669	9	High	DIANA|ElMMo3|MBStar|MirAncesTar|miRDB|MirMAP|Mirza-G|RepTar|RNAhybrid
SPOPL	Q4LDR2		hsa-miR-1248	0.20228	8	High	DIANA|ElMMo3|MirAncesTar|miRDB|MirMAP|MirTar|Mirza-G|RNAhybrid
CTXN3	Q5T1M5		hsa-miR-1248	0.202162	9	High	CoMeTa|DIANA|ElMMo3|MirAncesTar|miRDB|MirMAP|Mirza-G|RepTar|RNAhybrid
FKBP15	Q9HCD6		hsa-miR-1248	0.202111	8	High	BiTargeting|CoMeTa|DIANA|ElMMo3|MirAncesTar|MirMAP|RepTar|RNAhybrid
TANC2	Q86SG3		hsa-miR-1248	0.202091	9	High	DIANA|ElMMo3|MBStar|MirAncesTar|miRDB|MirMAP|Mirza-G|RNAhybrid|TargetSpy
DAZ4	O43307		hsa-miR-1248	0.201989	9	High	BiTargeting|CoMeTa|ElMMo3|MirAncesTar|miRDB|MirMAP|MirSNP|Mirza-G|RNAhybrid
ARHGEF9	Q9Y2G0		hsa-miR-1248	0.20197	8	High	ElMMo3|MBStar|MirAncesTar|miRDB|MirMAP|MirTar|Mirza-G|RNAhybrid
EFR3B	O15360		hsa-miR-1248	0.201774	9	High	BiTargeting|CoMeTa|DIANA|ElMMo3|MirAncesTar|miRDB|MirMAP|RepTar|RNAhybrid
FANCA	O00401		hsa-miR-1248	0.201769	6	High	Cupid|DIANA|MBStar|MirAncesTar|MirMAP|Mirza-G
WASL	P22307		hsa-miR-1248	0.201732	6	High	CoMeTa|DIANA|MirAncesTar|MirMAP|RNA22|RNAhybrid
SCP2	P17036		hsa-miR-1248	0.201602	7	High	CoMeTa|ElMMo3|MirAncesTar|MirMAP|Mirza-G|RNAhybrid|TargetSpy
ZNF3	Q9BWU0		hsa-miR-1248	0.201538	8	High	CoMeTa|DIANA|ElMMo3|MirAncesTar|miRDB|MirMAP|MirSNP|RNAhybrid
SLC4A1AP	O15446		hsa-miR-1248	0.201486	9	High	CoMeTa|DIANA|ElMMo3|MirAncesTar|miRDB|MirMAP|Mirza-G|RepTar|RNAhybrid
CD3EAP	Q13887		hsa-miR-1248	0.201475	10	High	DIANA|ElMMo3|MBStar|MirAncesTar|miRDB|MirMAP|MirSNP|Mirza-G|RNAhybrid|TargetSpy
KLF5	O15247		hsa-miR-1248	0.201405	9	High	CoMeTa|DIANA|ElMMo3|MirAncesTar|miRDB|MirMAP|Mirza-G|RNAhybrid|TargetSpy
CLIC2	O43149		hsa-miR-1248	0.20139	8	High	CoMeTa|DIANA|ElMMo3|MirAncesTar|miRDB|MirMAP|RepTar|RNAhybrid
ZZEF1	Q14974		hsa-miR-1248	0.201342	7	High	CoMeTa|DIANA|MBStar|MirAncesTar|MirMAP|RepTar|RNAhybrid
KPNB1	P36542		hsa-miR-1248	0.201153	7	High	CoMeTa|DIANA|ElMMo3|MirAncesTar|miRDB|MirMAP|RNAhybrid
ATP5C1	P15529		hsa-miR-1248	0.201093	5	High	CoMeTa|MBStar|MirAncesTar|RNA22|RNAhybrid
CD46	Q9NU19		hsa-miR-1248	0.201043	9	High	BiTargeting|CoMeTa|DIANA|ElMMo3|MirAncesTar|miRDB|MirMAP|RNAhybrid|TargetSpy
TBC1D22B	Q8NEF3		hsa-miR-1248	0.200991	9	High	BiTargeting|DIANA|ElMMo3|MirAncesTar|miRDB|MirMAP|Mirza-G|RepTar|RNAhybrid
CCDC112	O60890		hsa-miR-1248	0.200978	6	High	CoMeTa|DIANA|ElMMo3|MBStar|MirAncesTar|MirMAP
OPHN1	Q9Y672		hsa-miR-1248	0.200907	9	High	BiTargeting|DIANA|ElMMo3|MirAncesTar|miRDB|MirMAP|MirSNP|Mirza-G|RNAhybrid
ALG6	Q5TEA3		hsa-miR-1248	0.20077	8	High	DIANA|ElMMo3|MirAncesTar|miRDB|MirMAP|MirSNP|Mirza-G|RepTar
C20orf194	Q15878		hsa-miR-1248	0.200757	10	High	DIANA|MBStar|MirAncesTar|miRDB|MirMAP|MirSNP|MirTar|Mirza-G|RNA22|RNAhybrid
CACNA1E	Q9UPA5		hsa-miR-1248	0.200753	7	High	CoMeTa|DIANA|ElMMo3|MBStar|MirAncesTar|MirMAP|TargetSpy
BSN	Q9UPW0		hsa-miR-1248	0.200749	7	High	CoMeTa|DIANA|MBStar|MirAncesTar|MirMAP|Mirza-G|RNA22
FOXJ3	Q8N7B1		hsa-miR-1248	0.200705	9	High	DIANA|ElMMo3|MirAncesTar|miRDB|MirMAP|MirSNP|MirTar|Mirza-G|RNAhybrid
HORMAD2	P08047		hsa-miR-1248	0.200603	7	High	CoMeTa|DIANA|ElMMo3|MBStar|MirAncesTar|miRDB|MirMAP
SP1	P25067		hsa-miR-1248	0.200591	9	High	BiTargeting|CoMeTa|DIANA|ElMMo3|MirAncesTar|MirMAP|RepTar|RNA22|RNAhybrid
COL8A2	Q92551		hsa-miR-1248	0.200562	9	High	BiTargeting|CoMeTa|ElMMo3|MBStar|MirAncesTar|miRDB|MirMAP|RepTar|RNAhybrid
IP6K1	Q14093		hsa-miR-1248	0.200541	9	High	DIANA|ElMMo3|MBStar|MirAncesTar|miRDB|MirMAP|MirTar|Mirza-G|RNAhybrid
CYLC2	Q96M61		hsa-miR-1248	0.200343	9	High	DIANA|ElMMo3|MBStar|MirAncesTar|miRDB|MirMAP|RepTar|RNAhybrid|TargetSpy
MAGEB18	Q99583		hsa-miR-1248	0.20029	9	High	CoMeTa|DIANA|ElMMo3|MBStar|MirAncesTar|miRDB|MirMAP|RepTar|RNAhybrid
MNT	P35503		hsa-miR-1248	0.200217	9	High	DIANA|ElMMo3|MirAncesTar|miRDB|MirMAP|MirSNP|Mirza-G|RepTar|TargetSpy
UGT1A3	P35504		hsa-miR-1248	0.200217	9	High	DIANA|ElMMo3|MirAncesTar|miRDB|MirMAP|MirSNP|Mirza-G|RepTar|TargetSpy
UGT1A5	Q8IWY8		hsa-miR-1248	0.200186	9	High	DIANA|ElMMo3|MirAncesTar|miRDB|MirMAP|MirSNP|Mirza-G|RNAhybrid|TargetSpy
ZSCAN29	Q5VT97		hsa-miR-1248	0.199749	10	High	DIANA|ElMMo3|MirAncesTar|miRDB|MirMAP|Mirza-G|RepTar|RNA22|RNAhybrid|TargetSpy
SYDE2	Q96IV6		hsa-miR-1248	0.19969	7	High	CoMeTa|DIANA|MBStar|MirAncesTar|MirMAP|RepTar|RNAhybrid
FAXDC2	P46939		hsa-miR-1248	0.199612	4	High	CoMeTa|MirAncesTar|MirMAP|PACCMIT
UTRN	O75439		hsa-miR-1248	0.199515	7	High	CoMeTa|ElMMo3|MBStar|MirAncesTar|miRDB|MirTar|RNAhybrid
PMPCB	Q6ZS86		hsa-miR-1248	0.19948	10	High	BiTargeting|ElMMo3|MBStar|MirAncesTar|miRDB|MirMAP|Mirza-G|RepTar|RNAhybrid|TargetSpy
GK5	A2RU14		hsa-miR-1248	0.199478	9	High	DIANA|ElMMo3|MBStar|MirAncesTar|miRDB|MirMAP|MirTar|Mirza-G|RNAhybrid
TMEM218	O94888		hsa-miR-1248	0.199467	7	High	BiTargeting|CoMeTa|MBStar|MirAncesTar|MirMAP|RepTar|RNAhybrid
UBXN7	Q4LDG9		hsa-miR-1248	0.199422	9	High	ElMMo3|MBStar|MirAncesTar|miRDB|MirMAP|MirSNP|MirTar|Mirza-G|RNAhybrid
DNAL1	Q12791		hsa-miR-1248	0.199352	9	High	CoMeTa|DIANA|ElMMo3|MBStar|MirAncesTar|miRDB|MirMAP|MirSNP|RNAhybrid
KCNMA1	Q5SSG8		hsa-miR-1248	0.199269	10	High	DIANA|ElMMo3|MBStar|MirAncesTar|miRDB|MirMAP|Mirza-G|RepTar|RNAhybrid|TargetSpy
MUC21	Q86UE4		hsa-miR-1248	0.19923	5	High	CoMeTa|MBStar|MirAncesTar|MirMAP|RNAhybrid
MTDH	P60201		hsa-miR-1248	0.199209	7	High	CoMeTa|DIANA|MBStar|MirAncesTar|MirMAP|Mirza-G|RepTar
PLP1	P62068		hsa-miR-1248	0.199148	9	High	DIANA|ElMMo3|MBStar|MirAncesTar|miRDB|MirMAP|MirSNP|RepTar|RNAhybrid
USP46	O60244		hsa-miR-1248	0.199088	7	High	CoMeTa|DIANA|MBStar|MirAncesTar|MirMAP|RepTar|RNAhybrid
MED14	Q9H939		hsa-miR-1248	0.199052	9	High	CoMeTa|ElMMo3|MirAncesTar|miRDB|MirMAP|MirSNP|Mirza-G|RNAhybrid|TargetSpy
PSTPIP2	Q96T68		hsa-miR-1248	0.199018	9	High	DIANA|ElMMo3|MirAncesTar|miRDB|MirMAP|Mirza-G|RepTar|RNAhybrid|TargetSpy
SETDB2	P27037		hsa-miR-1248	0.198906	9	High	CoMeTa|DIANA|ElMMo3|MBStar|MirAncesTar|miRDB|MirMAP|RNAhybrid|TargetSpy
ACVR2A	Q14442		hsa-miR-1248	0.198836	9	High	CoMeTa|DIANA|ElMMo3|MirAncesTar|miRDB|MirMAP|Mirza-G|RNAhybrid|TargetSpy
PIGH	Q6UWR7		hsa-miR-1248	0.198662	9	High	DIANA|ElMMo3|MBStar|MirAncesTar|miRDB|MirMAP|MirSNP|Mirza-G|TargetSpy
ENPP6	Q12841		hsa-miR-1248	0.198661	7	High	CoMeTa|DIANA|MBStar|MirAncesTar|MirMAP|RepTar|RNAhybrid
FSTL1	P51153		hsa-miR-1248	0.198612	10	High	CoMeTa|DIANA|ElMMo3|MirAncesTar|miRDB|MirMAP|Mirza-G|RepTar|RNA22|RNAhybrid
RAB13	Q6P499		hsa-miR-1248	0.198484	10	High	DIANA|ElMMo3|MirAncesTar|miRDB|MirMAP|Mirza-G|RepTar|RNA22|RNAhybrid|TargetSpy
NIPAL3	O95502		hsa-miR-1248	0.198121	9	High	DIANA|ElMMo3|MBStar|MirAncesTar|miRDB|MirMAP|Mirza-G|RepTar|TargetSpy
NPTXR	Q96CS7		hsa-miR-1248	0.198101	9	High	DIANA|ElMMo3|MBStar|MirAncesTar|miRDB|MirMAP|Mirza-G|RNAhybrid|TargetSpy
PLEKHB2	Q8IUD2		hsa-miR-1248	0.198017	9	High	DIANA|ElMMo3|MBStar|MirAncesTar|miRDB|MirMAP|MirSNP|RepTar|RNAhybrid
ERC1	Q9Y6M7		hsa-miR-1248	0.197978	7	High	Cupid|DIANA|MBStar|MirAncesTar|MirMAP|Mirza-G|RNAhybrid
SLC4A7	Q05329		hsa-miR-1248	0.197896	8	High	CoMeTa|DIANA|ElMMo3|MirAncesTar|miRDB|MirMAP|Mirza-G|RNAhybrid
GAD2	Q96PU5		hsa-miR-1248	0.197826	9	High	DIANA|ElMMo3|MBStar|MirAncesTar|miRDB|MirMAP|Mirza-G|RepTar|RNAhybrid
NEDD4L	P01258		hsa-miR-1248	0.197633	6	High	CoMeTa|ElMMo3|MirAncesTar|RepTar|RNAhybrid|TargetSpy
CALCA	Q8TBQ9		hsa-miR-1248	0.197412	9	High	BiTargeting|DIANA|ElMMo3|MBStar|MirAncesTar|miRDB|MirMAP|MirSNP|Mirza-G
TMEM167A	O43674		hsa-miR-1248	0.197405	9	High	DIANA|ElMMo3|MBStar|MirAncesTar|miRDB|MirMAP|Mirza-G|RepTar|RNAhybrid
NDUFB5	P17707		hsa-miR-1248	0.197396	6	High	CoMeTa|DIANA|ElMMo3|MirAncesTar|MirMAP|RNAhybrid
AMD1	O43570		hsa-miR-1248	0.197251	7	High	BiTargeting|CoMeTa|MBStar|MirAncesTar|MirMAP|RepTar|RNAhybrid
CA12	Q9BW62		hsa-miR-1248	0.197191	10	High	DIANA|ElMMo3|MBStar|MirAncesTar|miRDB|MirMAP|MirSNP|Mirza-G|RNAhybrid|TargetSpy
KATNAL1	Q6W2J9		hsa-miR-1248	0.197099	6	High	Cupid|MBStar|MirAncesTar|MirMAP|Mirza-G|RNAhybrid
BCOR	Q13835		hsa-miR-1248	0.197097	11	High	BiTargeting|DIANA|ElMMo3|MBStar|MirAncesTar|miRDB|MirMAP|Mirza-G|RepTar|RNA22|TargetSpy
PKP1	Q92794		hsa-miR-1248	0.196965	7	High	CoMeTa|DIANA|MBStar|MirAncesTar|MirMAP|Mirza-G|RNAhybrid
KAT6A	Q6P9G4		hsa-miR-1248	0.196882	9	High	DIANA|ElMMo3|MBStar|MirAncesTar|miRDB|MirMAP|MirTar|Mirza-G|RNAhybrid
TMEM154	Q9BYG4		hsa-miR-1248	0.19684	9	High	DIANA|ElMMo3|MirAncesTar|miRDB|MirMAP|MirSNP|Mirza-G|RepTar|RNAhybrid
PARD6G	Q9Y2C5		hsa-miR-1248	0.196794	10	High	BiTargeting|DIANA|ElMMo3|MBStar|MirAncesTar|miRDB|MirMAP|MirTar|Mirza-G|RNAhybrid
SLC17A4	Q8IXS6		hsa-miR-1248	0.196744	9	High	DIANA|ElMMo3|MBStar|MirAncesTar|miRDB|MirMAP|RepTar|RNAhybrid|TargetSpy
PALM2	P35716		hsa-miR-1248	0.196731	7	High	CoMeTa|DIANA|ElMMo3|MirAncesTar|miRDB|MirMAP|TargetSpy
SOX11	Q9H0K6		hsa-miR-1248	0.196664	9	High	DIANA|ElMMo3|MBStar|MirAncesTar|MirMAP|MirTar|Mirza-G|RNAhybrid|TargetSpy
PUS7L	Q32P41		hsa-miR-1248	0.196586	8	High	CoMeTa|DIANA|ElMMo3|MBStar|MirAncesTar|miRDB|MirMAP|MirSNP
TRMT5	Q6UX41		hsa-miR-1248	0.196515	8	High	CoMeTa|ElMMo3|MBStar|MirAncesTar|miRDB|MirMAP|Mirza-G|RNAhybrid
BTNL8	Q9H7Y0		hsa-miR-1248	0.196498	9	High	DIANA|ElMMo3|MBStar|MirAncesTar|miRDB|MirMAP|Mirza-G|RNAhybrid|TargetSpy
CXorf36	Q9H2K8		hsa-miR-1248	0.196449	6	High	Cupid|DIANA|MirAncesTar|MirMAP|Mirza-G|RNAhybrid
TAOK3	Q96SU4		hsa-miR-1248	0.196387	6	High	CoMeTa|DIANA|MBStar|MirAncesTar|RNA22|RNAhybrid
OSBPL9	Q9NR90		hsa-miR-1248	0.196341	9	High	DIANA|ElMMo3|MBStar|MirAncesTar|miRDB|MirMAP|Mirza-G|RNAhybrid|TargetSpy
DAZ3	P09769		hsa-miR-1248	0.196256	9	High	BiTargeting|CoMeTa|ElMMo3|MBStar|MirAncesTar|MirMAP|RepTar|RNA22|RNAhybrid
FGR	Q8IU57		hsa-miR-1248	0.196055	10	High	DIANA|ElMMo3|MBStar|MirAncesTar|miRDB|MirMAP|RepTar|RNA22|RNAhybrid|TargetSpy
IFNLR1	O43291		hsa-miR-1248	0.196008	9	High	DIANA|ElMMo3|MirAncesTar|miRDB|MirMAP|MirTar|Mirza-G|RepTar|RNAhybrid
SPINT2	Q7L5A8		hsa-miR-1248	0.195885	9	High	DIANA|ElMMo3|MBStar|MirAncesTar|miRDB|MirMAP|Mirza-G|RNAhybrid|TargetSpy
FA2H	Q9UHK0		hsa-miR-1248	0.195825	8	High	CoMeTa|DIANA|ElMMo3|MBStar|MirAncesTar|MirMAP|RNAhybrid|TargetSpy
NUFIP1	Q9UKY7		hsa-miR-1248	0.195801	5	High	BiTargeting|CoMeTa|MBStar|MirAncesTar|RNAhybrid
CDV3	O95760		hsa-miR-1248	0.195766	7	High	CoMeTa|MBStar|MirAncesTar|MirMAP|Mirza-G|RepTar|RNAhybrid
IL33	Q8N3J5		hsa-miR-1248	0.195704	9	High	ElMMo3|MBStar|MirAncesTar|miRDB|MirSNP|MirTar|Mirza-G|RNAhybrid|TargetSpy
PPM1K	Q9HCJ0		hsa-miR-1248	0.195563	9	High	DIANA|ElMMo3|MBStar|MirAncesTar|miRDB|MirMAP|MirTar|Mirza-G|RNAhybrid
TNRC6C	Q9BRJ7		hsa-miR-1248	0.195521	9	High	DIANA|ElMMo3|MBStar|MirAncesTar|miRDB|MirMAP|MirSNP|PACCMIT|RNAhybrid
NUDT16L1	Q08050		hsa-miR-1248	0.195515	8	High	CoMeTa|DIANA|ElMMo3|MBStar|MirAncesTar|MirMAP|RepTar|RNAhybrid
FOXM1	O60271		hsa-miR-1248	0.195487	6	High	CoMeTa|DIANA|MBStar|MirAncesTar|MirMAP|RNAhybrid
SPAG9	P61201		hsa-miR-1248	0.195323	6	High	Cupid|MBStar|MirAncesTar|MirMAP|Mirza-G|RNAhybrid
COPS2	Q2VPB7		hsa-miR-1248	0.195284	10	High	BiTargeting|DIANA|ElMMo3|MirAncesTar|miRDB|MirMAP|MirSNP|Mirza-G|RepTar|RNAhybrid
AP5B1	Q9Y2G2		hsa-miR-1248	0.195274	9	High	CoMeTa|DIANA|ElMMo3|MBStar|MirAncesTar|miRDB|MirMAP|Mirza-G|RNAhybrid
CARD8	Q9H0R8		hsa-miR-1248	0.195239	6	High	BiTargeting|CoMeTa|ElMMo3|MirAncesTar|MirMAP|RNAhybrid
GABARAPL1	Q5VWJ9		hsa-miR-1248	0.195176	10	High	DIANA|ElMMo3|MBStar|MirAncesTar|miRDB|MirMAP|MirSNP|RepTar|RNAhybrid|TargetSpy
SNX30	P54762		hsa-miR-1248	0.19515	6	High	Cupid|MBStar|MirAncesTar|MirMAP|Mirza-G|RNAhybrid
EPHB1	Q17RW2		hsa-miR-1248	0.195149	8	High	DIANA|ElMMo3|MirAncesTar|miRDB|MirMAP|Mirza-G|RNA22|RNAhybrid
COL24A1	O75122		hsa-miR-1248	0.195071	6	High	CoMeTa|DIANA|ElMMo3|MirAncesTar|MirMAP|RNAhybrid
CLASP2	Q96LI5		hsa-miR-1248	0.195047	8	High	BiTargeting|Cupid|DIANA|ElMMo3|MBStar|MirAncesTar|MirMAP|RNAhybrid
CNOT6L	P60953		hsa-miR-1248	0.195046	5	High	CoMeTa|Cupid|MirAncesTar|RepTar|RNAhybrid
CDC42			hsa-miR-1248	0.195027	7	High	DIANA|MirAncesTar|miRDB|MirMAP|MirSNP|MirTar|RNAhybrid
TVP23C-CDRT4	Q15043		hsa-miR-1248	0.19493	10	High	DIANA|ElMMo3|MBStar|MirAncesTar|miRDB|MirMAP|MirSNP|Mirza-G|RepTar|RNAhybrid
SLC39A14	P62879		hsa-miR-1248	0.19477	9	High	CoMeTa|DIANA|ElMMo3|MBStar|MirAncesTar|miRDB|MirMAP|RepTar|RNAhybrid
GNB2	Q9H4L5		hsa-miR-1248	0.194702	9	High	CoMeTa|DIANA|ElMMo3|MBStar|MirAncesTar|miRDB|MirMAP|Mirza-G|RNAhybrid
OSBPL3	A8MZA4		hsa-miR-1248	0.194678	7	High	DIANA|ElMMo3|MBStar|MirAncesTar|miRDB|MirMAP|RNAhybrid
GOLGA6L6	Q96SF7		hsa-miR-1248	0.194672	11	High	DIANA|ElMMo3|MBStar|MirAncesTar|miRDB|MirMAP|Mirza-G|RepTar|RNA22|RNAhybrid|TargetSpy
TBX15	Q86V48		hsa-miR-1248	0.194604	11	High	BiTargeting|DIANA|ElMMo3|MBStar|MirAncesTar|miRDB|MirMAP|RepTar|RNA22|RNAhybrid|TargetSpy
LUZP1	Q2KHT3		hsa-miR-1248	0.194581	9	High	BiTargeting|DIANA|ElMMo3|MBStar|MirAncesTar|miRDB|MirMAP|RNAhybrid|TargetSpy
CLEC16A	Q14019		hsa-miR-1248	0.194536	8	High	BiTargeting|CoMeTa|DIANA|ElMMo3|MBStar|MirAncesTar|MirMAP|RNAhybrid
COTL1	Q14DG7		hsa-miR-1248	0.194534	8	High	BiTargeting|DIANA|ElMMo3|MBStar|MirAncesTar|miRDB|MirMAP|RepTar
TMEM132B	O76094		hsa-miR-1248	0.194528	5	High	CoMeTa|DIANA|MBStar|MirAncesTar|RNAhybrid
SRP72	Q8N945		hsa-miR-1248	0.194442	9	High	DIANA|ElMMo3|MBStar|MirAncesTar|miRDB|MirMAP|Mirza-G|RNAhybrid|TargetSpy
PRELID2	Q9UKS7		hsa-miR-1248	0.194432	9	High	BiTargeting|CoMeTa|DIANA|ElMMo3|MBStar|MirAncesTar|MirMAP|RNAhybrid|TargetSpy
IKZF2	Q6ZRZ4		hsa-miR-1248	0.194195	8	High	DIANA|ElMMo3|MBStar|MirAncesTar|MirMAP|RepTar|RNAhybrid|TargetSpy
C9orf47	Q9H2Y9		hsa-miR-1248	0.194168	9	High	CoMeTa|DIANA|ElMMo3|MBStar|MirAncesTar|miRDB|MirMAP|Mirza-G|RNAhybrid
SLCO5A1	Q8WWZ1		hsa-miR-1248	0.194131	10	High	BiTargeting|DIANA|ElMMo3|MirAncesTar|miRDB|MirMAP|Mirza-G|RepTar|RNAhybrid|TargetSpy
IL1F10	Q9UMD9		hsa-miR-1248	0.194117	10	High	DIANA|ElMMo3|MBStar|MirAncesTar|miRDB|MirMAP|MirTar|Mirza-G|RNAhybrid|TargetSpy
COL17A1	P17032		hsa-miR-1248	0.194094	7	High	CoMeTa|DIANA|ElMMo3|MBStar|MirAncesTar|MirMAP|TargetSpy
ZNF37A	Q07820		hsa-miR-1248	0.194086	6	High	BiTargeting|CoMeTa|MBStar|MirAncesTar|MirMAP|RNA22
MCL1	Q641Q2		hsa-miR-1248	0.194064	10	High	BiTargeting|DIANA|ElMMo3|MBStar|MirAncesTar|miRDB|MirMAP|MirTar|Mirza-G|RNAhybrid
WASHC2A	O00206		hsa-miR-1248	0.193909	10	High	DIANA|ElMMo3|MBStar|MirAncesTar|miRDB|MirMAP|Mirza-G|RepTar|RNAhybrid|TargetSpy
TLR4	Q9UN19		hsa-miR-1248	0.193866	10	High	BiTargeting|DIANA|ElMMo3|MBStar|MirAncesTar|miRDB|MirMAP|MirTar|Mirza-G|RNAhybrid
DAPP1	Q9Y2H5		hsa-miR-1248	0.19382	10	High	DIANA|ElMMo3|MBStar|MirAncesTar|miRDB|MirMAP|Mirza-G|RNA22|RNAhybrid|TargetSpy
PLEKHA6	P22681		hsa-miR-1248	0.193786	8	High	CoMeTa|ElMMo3|MBStar|MirAncesTar|MirMAP|RepTar|RNAhybrid|TargetSpy
CBL	Q8N7X8		hsa-miR-1248	0.193706	8	High	DIANA|ElMMo3|MirAncesTar|miRDB|MirMAP|Mirza-G|RepTar|TargetSpy
SIGLECL1	O60844		hsa-miR-1248	0.193677	7	High	DIANA|MBStar|MirAncesTar|miRDB|MirMAP|MirTar|Mirza-G
ZG16	P24666		hsa-miR-1248	0.193667	10	High	DIANA|ElMMo3|MBStar|MirAncesTar|miRDB|MirMAP|MirSNP|MirTar|Mirza-G|RNAhybrid
ACP1	Q9H7D7		hsa-miR-1248	0.193666	7	High	CoMeTa|DIANA|MBStar|MirAncesTar|MirMAP|RNA22|RNAhybrid
WDR26	Q5T6F0		hsa-miR-1248	0.193633	8	High	DIANA|ElMMo3|MirAncesTar|miRDB|MirMAP|MirTar|Mirza-G|RNAhybrid
DCAF12	Q9BZQ8		hsa-miR-1248	0.193575	11	High	DIANA|ElMMo3|MBStar|MirAncesTar|miRDB|MirMAP|Mirza-G|RepTar|RNA22|RNAhybrid|TargetSpy
FAM129A	Q9NRU3		hsa-miR-1248	0.193359	7	High	CoMeTa|DIANA|ElMMo3|MirAncesTar|MirMAP|Mirza-G|RepTar
CNNM1	Q96PJ5		hsa-miR-1248	0.193319	10	High	DIANA|ElMMo3|MBStar|MirAncesTar|miRDB|MirMAP|Mirza-G|RNA22|RNAhybrid|TargetSpy
FCRL4	Q96AJ9		hsa-miR-1248	0.193305	9	High	DIANA|ElMMo3|MBStar|MirAncesTar|miRDB|MirMAP|MirSNP|MirTar|Mirza-G
VTI1A	Q9BTE3		hsa-miR-1248	0.193116	9	High	DIANA|ElMMo3|MirAncesTar|miRDB|MirMAP|Mirza-G|RepTar|RNAhybrid|TargetSpy
MCMBP	Q5SY16		hsa-miR-1248	0.193079	9	High	BiTargeting|DIANA|ElMMo3|MirAncesTar|miRDB|MirMAP|MirSNP|Mirza-G|RNA22
NOL9	P22001		hsa-miR-1248	0.192983	6	High	CoMeTa|Cupid|MBStar|MirAncesTar|RNA22|RNAhybrid
KCNA3	Q92504		hsa-miR-1248	0.192733	9	High	CoMeTa|ElMMo3|MBStar|MirAncesTar|miRDB|MirMAP|Mirza-G|RepTar|RNAhybrid
SLC39A7	P42575		hsa-miR-1248	0.192694	10	High	DIANA|ElMMo3|MBStar|MirAncesTar|miRDB|MirMAP|MirSNP|Mirza-G|RepTar|RNAhybrid
CASP2	P60468		hsa-miR-1248	0.192623	8	High	CoMeTa|DIANA|ElMMo3|MBStar|MirAncesTar|miRDB|MirMAP|RNAhybrid
SEC61B	Q8TF65		hsa-miR-1248	0.192609	9	High	DIANA|ElMMo3|MBStar|MirAncesTar|MirMAP|Mirza-G|RepTar|RNA22|TargetSpy
GIPC2	O95847		hsa-miR-1248	0.192559	9	High	DIANA|ElMMo3|MBStar|MirAncesTar|MirMAP|Mirza-G|RepTar|RNAhybrid|TargetSpy
SLC25A27	O60333		hsa-miR-1248	0.192541	11	High	BiTargeting|DIANA|ElMMo3|MBStar|MirAncesTar|miRDB|MirMAP|MirSNP|RepTar|RNA22|RNAhybrid
KIF1B	Q96IZ5		hsa-miR-1248	0.192529	8	High	ElMMo3|MBStar|MirAncesTar|miRDB|MirMAP|MirTar|Mirza-G|RNAhybrid
RBM41	P48061		hsa-miR-1248	0.192523	7	High	Cupid|DIANA|ElMMo3|MBStar|MirAncesTar|MirMAP|RNAhybrid
CXCL12	Q96Q15		hsa-miR-1248	0.192494	9	High	DIANA|ElMMo3|MirAncesTar|miRDB|MirMAP|MirSNP|Mirza-G|RepTar|RNAhybrid
SMG1	Q8IWU5		hsa-miR-1248	0.1924	9	High	DIANA|ElMMo3|MBStar|MirAncesTar|miRDB|MirMAP|RepTar|RNAhybrid|TargetSpy
SULF2	Q13474		hsa-miR-1248	0.192295	8	High	BiTargeting|CoMeTa|DIANA|MBStar|MirAncesTar|MirMAP|RepTar|RNAhybrid
DRP2	Q9UJW0		hsa-miR-1248	0.19218	10	High	BiTargeting|DIANA|ElMMo3|MirAncesTar|miRDB|MirMAP|Mirza-G|RepTar|RNAhybrid|TargetSpy
DCTN4	Q9HDC5		hsa-miR-1248	0.191948	9	High	DIANA|ElMMo3|MBStar|MirAncesTar|miRDB|MirMAP|Mirza-G|PACCMIT|RNAhybrid
JPH1	Q8N3C0		hsa-miR-1248	0.191938	6	High	CoMeTa|DIANA|MBStar|MirAncesTar|MirMAP|RNAhybrid
ASCC3	O96028		hsa-miR-1248	0.191566	9	High	BiTargeting|DIANA|ElMMo3|MBStar|MirAncesTar|MirMAP|RepTar|RNAhybrid|TargetSpy
NSD2	Q8N998		hsa-miR-1248	0.191562	9	High	DIANA|ElMMo3|MirAncesTar|miRDB|MirMAP|Mirza-G|RepTar|RNAhybrid|TargetSpy
CCDC89	A8K979		hsa-miR-1248	0.191539	8	High	ElMMo3|MirAncesTar|MirMAP|MirSNP|MirTar|Mirza-G|RNAhybrid|TargetSpy
ERI2	P30411		hsa-miR-1248	0.191515	10	High	BiTargeting|DIANA|ElMMo3|MBStar|MirAncesTar|miRDB|MirMAP|MirSNP|RepTar|RNAhybrid
BDKRB2	P14136		hsa-miR-1248	0.191314	8	High	CoMeTa|DIANA|ElMMo3|MirAncesTar|miRDB|MirMAP|MirSNP|RNAhybrid
GFAP	A5PLK6		hsa-miR-1248	0.191283	9	High	DIANA|ElMMo3|MirAncesTar|miRDB|MirMAP|Mirza-G|PACCMIT|RNA22|RNAhybrid
RGSL1	P19021		hsa-miR-1248	0.191273	6	High	CoMeTa|MBStar|MirAncesTar|MirMAP|MirSNP|RNAhybrid
PAM	Q9BVC3		hsa-miR-1248	0.191246	8	High	DIANA|ElMMo3|MirAncesTar|miRDB|MirMAP|Mirza-G|RNAhybrid|TargetSpy
DSCC1	Q8TEU8		hsa-miR-1248	0.191219	9	High	DIANA|ElMMo3|MBStar|MirAncesTar|miRDB|MirMAP|Mirza-G|RepTar|RNAhybrid
WFIKKN2	Q13615		hsa-miR-1248	0.191178	8	High	CoMeTa|DIANA|ElMMo3|MBStar|MirAncesTar|MirMAP|RepTar|RNAhybrid
MTMR3	Q8NC54		hsa-miR-1248	0.191165	7	High	CoMeTa|ElMMo3|MirAncesTar|miRDB|MirMAP|Mirza-G|RNAhybrid
C5orf15	O60671		hsa-miR-1248	0.191152	10	High	BiTargeting|DIANA|ElMMo3|MBStar|MirAncesTar|miRDB|MirMAP|Mirza-G|RepTar|RNAhybrid
RAD1	Q8IXJ9		hsa-miR-1248	0.191103	8	High	CoMeTa|DIANA|ElMMo3|MirAncesTar|miRDB|MirMAP|Mirza-G|RNAhybrid
ASXL1	P53985		hsa-miR-1248	0.19109	6	High	CoMeTa|MBStar|MirAncesTar|MirMAP|RepTar|RNA22
SLC16A1	Q96PX9		hsa-miR-1248	0.191053	9	High	DIANA|ElMMo3|MBStar|MirAncesTar|miRDB|MirMAP|MirSNP|MirTar|RNAhybrid
PLEKHG4B	P23470		hsa-miR-1248	0.190989	7	High	CoMeTa|DIANA|MBStar|MirAncesTar|miRDB|MirMAP|RNAhybrid
PTPRG	Q9NRK6		hsa-miR-1248	0.190931	9	High	DIANA|ElMMo3|MirAncesTar|miRDB|MirMAP|MirTar|Mirza-G|RepTar|RNAhybrid
ABCB10	Q8WVH0		hsa-miR-1248	0.190919	9	High	DIANA|ElMMo3|MirAncesTar|miRDB|MirMAP|MirTar|Mirza-G|RepTar|RNAhybrid
CPLX3	Q9HD67		hsa-miR-1248	0.190803	9	High	BiTargeting|DIANA|MBStar|MirAncesTar|miRDB|MirMAP|RepTar|RNAhybrid|TargetSpy
MYO10	Q8N2G6		hsa-miR-1248	0.190708	7	High	CoMeTa|DIANA|MBStar|MirAncesTar|MirMAP|Mirza-G|RNAhybrid
ZCCHC24	Q149M9		hsa-miR-1248	0.190706	9	High	DIANA|ElMMo3|MBStar|MirAncesTar|miRDB|MirMAP|Mirza-G|PACCMIT|RNAhybrid
NWD1	Q9NXK8		hsa-miR-1248	0.190694	9	High	DIANA|ElMMo3|MirAncesTar|miRDB|MirMAP|MirSNP|Mirza-G|RepTar|RNAhybrid
FBXL12	Q8TAG6		hsa-miR-1248	0.190686	10	High	BiTargeting|DIANA|ElMMo3|MBStar|MirAncesTar|miRDB|MirMAP|Mirza-G|RepTar|RNAhybrid
C8orf46	P50454		hsa-miR-1248	0.190666	7	High	CoMeTa|DIANA|MBStar|MirAncesTar|MirMAP|RepTar|RNAhybrid
SERPINH1	Q9HBU6		hsa-miR-1248	0.190545	5	High	CoMeTa|MBStar|MirAncesTar|RepTar|RNAhybrid
ETNK1	Q14814		hsa-miR-1248	0.190528	9	High	BiTargeting|CoMeTa|DIANA|MirAncesTar|MirMAP|Mirza-G|RepTar|RNA22|RNAhybrid
MEF2D	P51826		hsa-miR-1248	0.190487	8	High	CoMeTa|ElMMo3|MBStar|MirAncesTar|miRDB|MirMAP|Mirza-G|RNAhybrid
AFF3	Q9UH92		hsa-miR-1248	0.190296	10	High	DIANA|ElMMo3|MBStar|MirAncesTar|miRDB|MirMAP|Mirza-G|RepTar|RNAhybrid|TargetSpy
MLX	P13591		hsa-miR-1248	0.190236	7	High	Cupid|ElMMo3|MBStar|MirAncesTar|MirMAP|RepTar|RNAhybrid
NCAM1	Q9H330		hsa-miR-1248	0.190198	8	High	CoMeTa|ElMMo3|MBStar|MirAncesTar|miRDB|MirMAP|RNAhybrid|TargetSpy
TMEM245	Q9H5V9		hsa-miR-1248	0.19011	7	High	DIANA|ElMMo3|MBStar|MirAncesTar|miRDB|MirMAP|Mirza-G
CXorf56	Q13117		hsa-miR-1248	0.190098	9	High	DIANA|ElMMo3|MBStar|MirAncesTar|miRDB|MirMAP|Mirza-G|RNAhybrid|TargetSpy
DAZ2	Q8IUR6		hsa-miR-1248	0.190089	6	High	Cupid|DIANA|MirAncesTar|MirMAP|Mirza-G|RNAhybrid
CREBRF	O75581		hsa-miR-1248	0.190045	7	High	CoMeTa|DIANA|MirAncesTar|MirMAP|Mirza-G|RepTar|RNAhybrid
LRP6	Q86Y38		hsa-miR-1248	0.190011	8	High	DIANA|ElMMo3|MBStar|MirAncesTar|miRDB|MirMAP|RepTar|TargetSpy
XYLT1	Q9Y4L1		hsa-miR-1248	0.189918	8	High	ElMMo3|MirAncesTar|miRDB|MirMAP|MirSNP|PACCMIT|RepTar|RNAhybrid
HYOU1	Q8IWF6		hsa-miR-1248	0.189795	9	High	DIANA|ElMMo3|MBStar|MirAncesTar|miRDB|MirMAP|MirSNP|Mirza-G|TargetSpy
DENND6A	Q13342		hsa-miR-1248	0.189714	6	High	CoMeTa|ElMMo3|MirAncesTar|MirMAP|MirTar|RNAhybrid
SP140	Q96SF2		hsa-miR-1248	0.189709	8	High	CoMeTa|DIANA|ElMMo3|MirAncesTar|miRDB|MirMAP|RepTar|RNAhybrid
CCT8L2	Q8N812		hsa-miR-1248	0.189687	8	High	DIANA|ElMMo3|MirAncesTar|MirMAP|MirTar|Mirza-G|RNAhybrid|TargetSpy
C12orf76	Q8IX30		hsa-miR-1248	0.189617	8	High	CoMeTa|DIANA|ElMMo3|MBStar|MirAncesTar|miRDB|MirMAP|Mirza-G
SCUBE3	Q96L92		hsa-miR-1248	0.189597	7	High	BiTargeting|CoMeTa|DIANA|MBStar|MirAncesTar|RepTar|RNA22
SNX27	O43365		hsa-miR-1248	0.189565	9	High	CoMeTa|DIANA|ElMMo3|MirAncesTar|miRDB|MirMAP|Mirza-G|RepTar|RNAhybrid
HOXA3	Q96B02		hsa-miR-1248	0.189536	8	High	BiTargeting|DIANA|MirAncesTar|miRDB|MirMAP|Mirza-G|RepTar|RNAhybrid
UBE2W	Q86Y78		hsa-miR-1248	0.189531	9	High	DIANA|ElMMo3|MBStar|MirAncesTar|miRDB|MirMAP|MirTar|Mirza-G|RNAhybrid
LYPD6	Q86SS6		hsa-miR-1248	0.189508	10	High	BiTargeting|DIANA|ElMMo3|MBStar|MirAncesTar|miRDB|MirMAP|Mirza-G|RNAhybrid|TargetSpy
SYT9	Q8IUH5		hsa-miR-1248	0.189506	4	High	CoMeTa|MBStar|MirAncesTar|RNAhybrid
ZDHHC17	P35610		hsa-miR-1248	0.189445	9	High	DIANA|ElMMo3|MBStar|MirAncesTar|miRDB|MirMAP|MirSNP|Mirza-G|TargetSpy
SOAT1	Q8WZA9		hsa-miR-1248	0.189411	9	High	DIANA|ElMMo3|MBStar|MirAncesTar|miRDB|MirMAP|MirTar|Mirza-G|RNAhybrid
IRGQ	Q96C24		hsa-miR-1248	0.189407	9	High	ElMMo3|MBStar|MirAncesTar|miRDB|MirMAP|Mirza-G|RepTar|RNAhybrid|TargetSpy
SYTL4	P20151		hsa-miR-1248	0.189317	8	High	BiTargeting|CoMeTa|ElMMo3|MBStar|MirAncesTar|miRDB|MirMAP|RNAhybrid
KLK2	Q9C0I9		hsa-miR-1248	0.18931	9	High	DIANA|ElMMo3|MBStar|MirAncesTar|miRDB|MirMAP|Mirza-G|RepTar|RNAhybrid
LRRC27	Q8N752		hsa-miR-1248	0.189244	6	High	Cupid|DIANA|MirAncesTar|MirMAP|Mirza-G|RNAhybrid
CSNK1A1L	Q9ULQ0		hsa-miR-1248	0.189141	9	High	DIANA|ElMMo3|MBStar|MirAncesTar|miRDB|MirMAP|MirTar|Mirza-G|RNAhybrid
STRIP2	P07996		hsa-miR-1248	0.189114	5	High	CoMeTa|DIANA|MirAncesTar|MirMAP|RepTar
THBS1	Q14571		hsa-miR-1248	0.189094	6	High	CoMeTa|DIANA|ElMMo3|MirAncesTar|RepTar|RNAhybrid
ITPR2	Q96PM5		hsa-miR-1248	0.188924	10	High	DIANA|ElMMo3|MBStar|MirAncesTar|miRDB|MirMAP|MirSNP|Mirza-G|RNAhybrid|TargetSpy
RCHY1	Q5VZT2		hsa-miR-1248	0.188907	8	High	DIANA|ElMMo3|MirAncesTar|miRDB|MirMAP|MirSNP|Mirza-G|RNAhybrid
C10orf113	Q99836		hsa-miR-1248	0.188846	10	High	DIANA|ElMMo3|MBStar|MirAncesTar|miRDB|MirMAP|Mirza-G|RepTar|RNAhybrid|TargetSpy
MYD88	P98170		hsa-miR-1248	0.188737	8	High	CoMeTa|DIANA|ElMMo3|MirAncesTar|miRDB|MirMAP|Mirza-G|TargetSpy
XIAP	Q93034		hsa-miR-1248	0.188693	5	High	CoMeTa|MBStar|MirAncesTar|MirMAP|RNAhybrid
CUL5	O15394		hsa-miR-1248	0.188666	8	High	DIANA|ElMMo3|MirAncesTar|MirMAP|MirSNP|Mirza-G|RepTar|TargetSpy
NCAM2	Q8WVK7		hsa-miR-1248	0.188603	10	High	DIANA|ElMMo3|MBStar|MirAncesTar|miRDB|MirMAP|MirSNP|Mirza-G|RNAhybrid|TargetSpy
SKA2	A0AV02		hsa-miR-1248	0.188599	9	High	DIANA|ElMMo3|MirAncesTar|miRDB|MirMAP|MirTar|Mirza-G|RNAhybrid|TargetSpy
SLC12A8	Q14721		hsa-miR-1248	0.188469	8	High	DIANA|ElMMo3|MBStar|MirAncesTar|miRDB|MirMAP|RepTar|RNAhybrid
KCNB1	Q14209		hsa-miR-1248	0.188463	7	High	CoMeTa|DIANA|ElMMo3|MirAncesTar|miRDB|MirMAP|RNA22
E2F2	Q4VC05		hsa-miR-1248	0.188394	8	High	CoMeTa|DIANA|ElMMo3|MBStar|MirAncesTar|miRDB|MirMAP|RNAhybrid
BCL7A	O15084		hsa-miR-1248	0.188393	6	High	Cupid|MBStar|MirAncesTar|MirMAP|Mirza-G|RNAhybrid
ANKRD28			hsa-miR-1248	0.188207	8	High	DIANA|ElMMo3|MBStar|MirAncesTar|miRDB|MirMAP|Mirza-G|RNAhybrid
BCLAF3	P33151		hsa-miR-1248	0.188175	6	High	CoMeTa|DIANA|MirAncesTar|MirMAP|RepTar|RNAhybrid
CDH5	Q6N075		hsa-miR-1248	0.188016	8	High	CoMeTa|DIANA|ElMMo3|MirAncesTar|miRDB|MirMAP|Mirza-G|RNAhybrid
MFSD5	Q9UPM8		hsa-miR-1248	0.18794	10	High	CoMeTa|DIANA|ElMMo3|MBStar|MirAncesTar|miRDB|MirMAP|MirSNP|Mirza-G|RNAhybrid
AP4E1	Q8NBF2		hsa-miR-1248	0.187916	6	High	BiTargeting|CoMeTa|DIANA|MBStar|MirAncesTar|MirMAP
NHLRC2	Q6IC98		hsa-miR-1248	0.187815	8	High	CoMeTa|DIANA|ElMMo3|MirAncesTar|miRDB|MirMAP|Mirza-G|TargetSpy
GRAMD4	P12270		hsa-miR-1248	0.18769	6	High	BiTargeting|CoMeTa|ElMMo3|MirAncesTar|RepTar|RNA22
TPR	Q9UBP9		hsa-miR-1248	0.187688	5	High	CoMeTa|MBStar|MirAncesTar|MirMAP|RNAhybrid
GULP1	Q9NSD4		hsa-miR-1248	0.187685	8	High	BiTargeting|DIANA|ElMMo3|MirAncesTar|miRDB|MirMAP|Mirza-G|TargetSpy
ZNF275	P51795		hsa-miR-1248	0.187684	8	High	BiTargeting|CoMeTa|DIANA|MBStar|MirAncesTar|MirMAP|RepTar|RNAhybrid
CLCN5	Q9ULK2		hsa-miR-1248	0.187637	9	High	CoMeTa|DIANA|ElMMo3|MBStar|MirAncesTar|miRDB|MirMAP|Mirza-G|RNAhybrid
ATXN7L1	Q63HM9		hsa-miR-1248	0.187592	8	High	DIANA|ElMMo3|MBStar|MirAncesTar|miRDB|MirMAP|RepTar|TargetSpy
PLCXD3	P16422		hsa-miR-1248	0.18752	7	High	CoMeTa|DIANA|ElMMo3|MirAncesTar|miRDB|MirMAP|RNAhybrid
EPCAM	Q8TDI0		hsa-miR-1248	0.187491	8	High	CoMeTa|DIANA|MBStar|MirAncesTar|MirMAP|RepTar|RNA22|RNAhybrid
CHD5	Q86WR7		hsa-miR-1248	0.187428	8	High	DIANA|ElMMo3|MirAncesTar|miRDB|MirMAP|Mirza-G|RNAhybrid|TargetSpy
PROSER2	Q5T2T1		hsa-miR-1248	0.187427	8	High	DIANA|ElMMo3|MirAncesTar|miRDB|MirMAP|MirTar|Mirza-G|TargetSpy
MPP7	Q15125		hsa-miR-1248	0.18742	9	High	CoMeTa|DIANA|ElMMo3|MirAncesTar|miRDB|MirMAP|Mirza-G|RepTar|RNAhybrid
EBP	Q13398		hsa-miR-1248	0.187325	10	High	BiTargeting|DIANA|ElMMo3|MBStar|MirAncesTar|miRDB|MirMAP|Mirza-G|RepTar|RNAhybrid
ZNF211	Q8TDX6		hsa-miR-1248	0.187295	5	High	CoMeTa|DIANA|MirAncesTar|MirMAP|RNAhybrid
CSGALNACT1	Q9UPZ9		hsa-miR-1248	0.18723	7	High	CoMeTa|DIANA|ElMMo3|MBStar|MirAncesTar|MirMAP|TargetSpy
ICK	Q9P1A6		hsa-miR-1248	0.187127	7	High	CoMeTa|DIANA|MBStar|MirAncesTar|MirMAP|RepTar|RNAhybrid
DLGAP2	Q7RTV5		hsa-miR-1248	0.187103	9	High	DIANA|ElMMo3|MBStar|MirAncesTar|miRDB|MirMAP|Mirza-G|RepTar|TargetSpy
AAED1	Q9BWW4		hsa-miR-1248	0.187024	9	High	CoMeTa|DIANA|ElMMo3|MBStar|MirAncesTar|miRDB|MirMAP|RNA22|RNAhybrid
SSBP3	Q7LGA3		hsa-miR-1248	0.187	5	High	CoMeTa|MBStar|MirAncesTar|RNA22|RNAhybrid
HS2ST1	P00533		hsa-miR-1248	0.186979	10	High	DIANA|ElMMo3|MBStar|MirAncesTar|miRDB|MirMAP|MirSNP|Mirza-G|RNAhybrid|TargetSpy
EGFR	P24385		hsa-miR-1248	0.186874	7	High	CoMeTa|DIANA|MBStar|MirAncesTar|MirMAP|RepTar|RNAhybrid
CCND1	Q52M93		hsa-miR-1248	0.18683	8	High	DIANA|ElMMo3|MirAncesTar|miRDB|MirMAP|MirTar|Mirza-G|RNAhybrid
ZNF585B	Q9BUN1		hsa-miR-1248	0.186818	8	High	BiTargeting|CoMeTa|DIANA|ElMMo3|MirAncesTar|MirMAP|RepTar|RNAhybrid
C1orf56	P50222		hsa-miR-1248	0.186752	7	High	CoMeTa|ElMMo3|MBStar|MirAncesTar|MirMAP|RepTar|RNAhybrid
MEOX2	Q9UKA4		hsa-miR-1248	0.18669	3	High	CoMeTa|MBStar|MirAncesTar
AKAP11	Q9BXU9		hsa-miR-1248	0.186681	8	High	BiTargeting|DIANA|ElMMo3|MBStar|MirAncesTar|miRDB|MirMAP|RepTar
CALN1	Q9NP90		hsa-miR-1248	0.186604	8	High	DIANA|ElMMo3|MirAncesTar|miRDB|MirMAP|Mirza-G|PACCMIT|RepTar
RAB9B	Q8N490		hsa-miR-1248	0.186534	9	High	DIANA|ElMMo3|MBStar|MirAncesTar|miRDB|MirMAP|RepTar|RNAhybrid|TargetSpy
PNKD	Q8WWW8		hsa-miR-1248	0.186527	9	High	DIANA|ElMMo3|MBStar|MirAncesTar|miRDB|MirMAP|MirTar|Mirza-G|RNAhybrid
GAB3	Q8WVV4		hsa-miR-1248	0.18652	8	High	CoMeTa|DIANA|MBStar|MirAncesTar|MirMAP|Mirza-G|RepTar|RNAhybrid
POF1B	Q9Y383		hsa-miR-1248	0.18634	5	High	CoMeTa|MBStar|MirAncesTar|MirMAP|RNAhybrid
LUC7L2	P55198		hsa-miR-1248	0.186338	10	High	BiTargeting|DIANA|ElMMo3|MBStar|MirAncesTar|MirMAP|Mirza-G|RepTar|RNAhybrid|TargetSpy
MLLT6	Q9UGP4		hsa-miR-1248	0.186291	10	High	DIANA|ElMMo3|MBStar|MirAncesTar|miRDB|MirMAP|Mirza-G|RepTar|RNAhybrid|TargetSpy
LIMD1	P49918		hsa-miR-1248	0.186256	7	High	BiTargeting|CoMeTa|ElMMo3|MirAncesTar|MirMAP|RepTar|RNAhybrid
CDKN1C	Q8TAP4		hsa-miR-1248	0.186081	6	High	CoMeTa|DIANA|MBStar|MirAncesTar|RepTar|RNAhybrid
LMO3	Q13275		hsa-miR-1248	0.186049	7	High	CoMeTa|ElMMo3|MirAncesTar|miRDB|MirMAP|RepTar|RNAhybrid
SEMA3F	O00442		hsa-miR-1248	0.186004	5	High	CoMeTa|MBStar|MirAncesTar|MirMAP|RNAhybrid
RTCA	Q9UL03		hsa-miR-1248	0.185993	9	High	BiTargeting|ElMMo3|MBStar|MirAncesTar|miRDB|Mirza-G|RepTar|RNAhybrid|TargetSpy
INTS6	Q14032		hsa-miR-1248	0.185933	9	High	CoMeTa|DIANA|ElMMo3|MBStar|MirAncesTar|miRDB|MirMAP|Mirza-G|RNAhybrid
BAAT	Q96IG2		hsa-miR-1248	0.185901	9	High	DIANA|MBStar|MirAncesTar|miRDB|MirMAP|Mirza-G|RepTar|RNAhybrid|TargetSpy
FBXL20	P28288		hsa-miR-1248	0.185888	6	High	BiTargeting|CoMeTa|MBStar|MirAncesTar|RNA22|RNAhybrid
ABCD3	A1X283		hsa-miR-1248	0.185759	8	High	DIANA|ElMMo3|MirAncesTar|miRDB|MirMAP|RepTar|RNAhybrid|TargetSpy
SH3PXD2B	Q9NX65		hsa-miR-1248	0.185758	8	High	DIANA|ElMMo3|MirAncesTar|MirMAP|MirTar|Mirza-G|RNAhybrid|TargetSpy
ZSCAN32	Q6ICC9		hsa-miR-1248	0.185702	9	High	DIANA|ElMMo3|MBStar|MirAncesTar|miRDB|MirMAP|Mirza-G|RepTar|TargetSpy
RTL6	Q8ND71		hsa-miR-1248	0.185656	9	High	DIANA|ElMMo3|MBStar|MirAncesTar|miRDB|MirMAP|MirTar|Mirza-G|RNAhybrid
GIMAP8	Q14188		hsa-miR-1248	0.185483	9	High	CoMeTa|DIANA|ElMMo3|MBStar|MirAncesTar|miRDB|MirMAP|Mirza-G|RNAhybrid
TFDP2	P78543		hsa-miR-1248	0.185407	7	High	CoMeTa|ElMMo3|MirAncesTar|miRDB|MirMAP|Mirza-G|RNAhybrid
BTG2	Q6Q8B3		hsa-miR-1248	0.185347	8	High	DIANA|ElMMo3|MirAncesTar|miRDB|MirMAP|Mirza-G|RNAhybrid|TargetSpy
CD200R1L	Q7RTV3		hsa-miR-1248	0.185336	7	High	DIANA|ElMMo3|MirAncesTar|miRDB|MirMAP|MirTar|Mirza-G
ZNF367	P80162		hsa-miR-1248	0.18512	9	High	DIANA|ElMMo3|MBStar|MirAncesTar|miRDB|MirMAP|MirTar|Mirza-G|RNAhybrid
CXCL6	Q15397		hsa-miR-1248	0.185075	9	High	DIANA|ElMMo3|MirAncesTar|miRDB|MirMAP|MirSNP|Mirza-G|RNAhybrid|TargetSpy
PUM3	Q5UCC4		hsa-miR-1248	0.184921	8	High	DIANA|ElMMo3|MirAncesTar|miRDB|MirMAP|Mirza-G|PACCMIT|RNAhybrid
EMC10	P26006		hsa-miR-1248	0.184817	8	High	CoMeTa|DIANA|ElMMo3|MirAncesTar|miRDB|MirMAP|Mirza-G|RNAhybrid
ITGA3	Q9UPV7		hsa-miR-1248	0.184715	6	High	CoMeTa|DIANA|ElMMo3|MirAncesTar|MirMAP|RepTar
PHF24	Q86UQ0		hsa-miR-1248	0.184685	8	High	CoMeTa|ElMMo3|MirAncesTar|miRDB|MirMAP|MirSNP|Mirza-G|RNAhybrid
ZNF589	P09543		hsa-miR-1248	0.184682	8	High	BiTargeting|DIANA|ElMMo3|MirAncesTar|MirMAP|RepTar|RNAhybrid|TargetSpy
CNP	P29375		hsa-miR-1248	0.184667	6	High	CoMeTa|DIANA|ElMMo3|MBStar|MirAncesTar|MirMAP
KDM5A	P29353		hsa-miR-1248	0.184652	8	High	CoMeTa|ElMMo3|MirAncesTar|miRDB|MirMAP|Mirza-G|RNA22|RNAhybrid
SHC1	Q6ZN28		hsa-miR-1248	0.184552	9	High	DIANA|ElMMo3|MBStar|MirAncesTar|miRDB|MirMAP|Mirza-G|RNAhybrid|TargetSpy
MACC1	Q6ZMP0		hsa-miR-1248	0.184533	8	High	CoMeTa|DIANA|MBStar|MirAncesTar|MirMAP|MirSNP|Mirza-G|RNAhybrid
THSD4	Q9NW68		hsa-miR-1248	0.184518	8	High	CoMeTa|DIANA|ElMMo3|MirAncesTar|MirMAP|RepTar|RNA22|RNAhybrid
BSDC1	A6NKN8		hsa-miR-1248	0.184473	10	High	DIANA|ElMMo3|MBStar|MirAncesTar|miRDB|MirMAP|Mirza-G|RepTar|RNAhybrid|TargetSpy
PCP4L1	Q92556		hsa-miR-1248	0.184433	7	High	CoMeTa|ElMMo3|MirAncesTar|miRDB|MirMAP|RepTar|RNAhybrid
ELMO1	Q04656		hsa-miR-1248	0.184343	6	High	CoMeTa|DIANA|MBStar|MirAncesTar|MirMAP|Mirza-G
ATP7A			hsa-miR-1248	0.184308	7	High	BiTargeting|CoMeTa|DIANA|ElMMo3|MirAncesTar|MirMAP|RNAhybrid
GCOM1	Q9NSA2		hsa-miR-1248	0.184239	8	High	CoMeTa|ElMMo3|MirAncesTar|miRDB|MirMAP|MirSNP|RepTar|RNAhybrid
KCND1	Q9HD45		hsa-miR-1248	0.184208	4	High	CoMeTa|MBStar|MirAncesTar|MirMAP
TM9SF3	Q6ZQN5		hsa-miR-1248	0.184192	9	High	BiTargeting|DIANA|ElMMo3|MBStar|MirAncesTar|miRDB|MirMAP|Mirza-G|RepTar
FOXI2	P53355		hsa-miR-1248	0.184043	7	High	BiTargeting|CoMeTa|ElMMo3|MBStar|MirAncesTar|MirMAP|RNAhybrid
DAPK1	Q96PQ7		hsa-miR-1248	0.183928	8	High	ElMMo3|MBStar|MirAncesTar|miRDB|MirSNP|MirTar|Mirza-G|RNAhybrid
KLHL5	Q96NY7		hsa-miR-1248	0.183899	8	High	DIANA|ElMMo3|MBStar|MirAncesTar|MirMAP|RepTar|RNAhybrid|TargetSpy
CLIC6	Q8IZP7		hsa-miR-1248	0.183869	8	High	BiTargeting|ElMMo3|MBStar|MirAncesTar|miRDB|Mirza-G|RepTar|TargetSpy
HS6ST3	Q6DCA0		hsa-miR-1248	0.183826	8	High	DIANA|ElMMo3|MBStar|MirAncesTar|miRDB|MirMAP|PACCMIT|RepTar
AMMECR1L	Q9C0E4		hsa-miR-1248	0.183718	7	High	CoMeTa|ElMMo3|MBStar|MirAncesTar|miRDB|MirSNP|RNAhybrid
GRIP2	Q8N3H0		hsa-miR-1248	0.183694	9	High	BiTargeting|DIANA|ElMMo3|MirAncesTar|miRDB|MirMAP|Mirza-G|RepTar|RNAhybrid
FAM19A2	Q3MJ13		hsa-miR-1248	0.183607	10	High	BiTargeting|DIANA|ElMMo3|MBStar|MirAncesTar|miRDB|MirMAP|Mirza-G|RepTar|RNAhybrid
WDR72	Q9BZW2		hsa-miR-1248	0.183547	9	High	BiTargeting|DIANA|ElMMo3|MBStar|MirAncesTar|miRDB|MirMAP|MirTar|RNAhybrid
SLC13A1	Q96B42		hsa-miR-1248	0.183547	10	High	DIANA|ElMMo3|MBStar|MirAncesTar|miRDB|MirMAP|Mirza-G|RepTar|RNAhybrid|TargetSpy
TMEM18	O95528		hsa-miR-1248	0.183519	8	High	DIANA|ElMMo3|MBStar|MirAncesTar|miRDB|MirMAP|Mirza-G|TargetSpy
SLC2A10	Q8NCG5		hsa-miR-1248	0.183506	5	High	CoMeTa|MirAncesTar|MirMAP|RepTar|RNAhybrid
CHST4	Q8WW59		hsa-miR-1248	0.183474	8	High	DIANA|ElMMo3|MBStar|MirAncesTar|miRDB|MirMAP|MirTar|TargetSpy
SPRYD4	Q76I76		hsa-miR-1248	0.183459	9	High	DIANA|ElMMo3|MBStar|MirAncesTar|miRDB|MirMAP|Mirza-G|RNAhybrid|TargetSpy
SSH2	P50607		hsa-miR-1248	0.183454	8	High	DIANA|ElMMo3|MBStar|MirAncesTar|MirMAP|RepTar|RNAhybrid|TargetSpy
TUB	O15519		hsa-miR-1248	0.183434	7	High	CoMeTa|MBStar|MirAncesTar|miRDB|MirSNP|Mirza-G|RNAhybrid
CFLAR	P49281		hsa-miR-1248	0.183409	10	High	DIANA|ElMMo3|MBStar|MirAncesTar|miRDB|MirMAP|Mirza-G|RepTar|RNAhybrid|TargetSpy
SLC11A2	Q8NCN4		hsa-miR-1248	0.183402	8	High	DIANA|ElMMo3|MirAncesTar|miRDB|MirMAP|RepTar|RNAhybrid|TargetSpy
RNF169	P68104		hsa-miR-1248	0.18332	7	High	CoMeTa|DIANA|MBStar|MirAncesTar|MirMAP|Mirza-G|RNAhybrid
EEF1A1	Q8IZC4		hsa-miR-1248	0.183073	9	High	ElMMo3|MBStar|MirAncesTar|miRDB|MirMAP|MirSNP|Mirza-G|RepTar|RNAhybrid
RTKN2			hsa-miR-1248	0.182894	7	High	DIANA|ElMMo3|MirAncesTar|miRDB|MirSNP|MirTar|RNAhybrid
KLRC4-KLRK1	Q9ULC6		hsa-miR-1248	0.182726	10	High	BiTargeting|DIANA|ElMMo3|MirAncesTar|miRDB|MirMAP|MirSNP|RepTar|RNA22|RNAhybrid
PADI1	Q70SY1		hsa-miR-1248	0.182724	9	High	DIANA|ElMMo3|MBStar|MirAncesTar|miRDB|MirMAP|Mirza-G|RepTar|RNAhybrid
CREB3L2	Q13705		hsa-miR-1248	0.182692	7	High	CoMeTa|ElMMo3|MBStar|MirAncesTar|miRDB|Mirza-G|TargetSpy
ACVR2B	Q9NQ89		hsa-miR-1248	0.182681	8	High	DIANA|ElMMo3|MirAncesTar|miRDB|MirMAP|MirSNP|Mirza-G|RNAhybrid
C12orf4	Q7Z628		hsa-miR-1248	0.182585	7	High	BiTargeting|CoMeTa|DIANA|MBStar|MirAncesTar|MirMAP|RNAhybrid
NET1	Q9NT68		hsa-miR-1248	0.182539	8	High	CoMeTa|DIANA|ElMMo3|MirAncesTar|miRDB|MirMAP|MirTar|RNAhybrid
TENM2	Q8TED9		hsa-miR-1248	0.182511	10	High	DIANA|ElMMo3|MBStar|MirAncesTar|miRDB|MirMAP|MirSNP|Mirza-G|RepTar|RNAhybrid
AFAP1L1	Q9NV96		hsa-miR-1248	0.182497	5	High	BiTargeting|CoMeTa|MBStar|MirAncesTar|RNAhybrid
TMEM30A	P55017		hsa-miR-1248	0.182484	10	High	DIANA|ElMMo3|MBStar|MirAncesTar|miRDB|MirMAP|MirSNP|Mirza-G|RNAhybrid|TargetSpy
SLC12A3	O60476		hsa-miR-1248	0.182468	7	High	CoMeTa|DIANA|MirAncesTar|miRDB|MirMAP|RNA22|RNAhybrid
MAN1A2	Q6UB98		hsa-miR-1248	0.182468	8	High	DIANA|ElMMo3|MirAncesTar|miRDB|MirMAP|RepTar|RNAhybrid|TargetSpy
ANKRD12	Q9BZQ6		hsa-miR-1248	0.182445	7	High	CoMeTa|DIANA|MBStar|MirAncesTar|MirMAP|RNA22|RNAhybrid
EDEM3	Q9HCH0		hsa-miR-1248	0.182139	8	High	DIANA|ElMMo3|MirAncesTar|miRDB|MirMAP|PACCMIT|RepTar|RNAhybrid
NCKAP5L	Q6PKX4		hsa-miR-1248	0.182091	8	High	DIANA|ElMMo3|MBStar|MirAncesTar|miRDB|MirMAP|Mirza-G|RNAhybrid
DOK6	Q8TDC0		hsa-miR-1248	0.182088	9	High	DIANA|ElMMo3|MBStar|MirAncesTar|miRDB|MirMAP|Mirza-G|RNAhybrid|TargetSpy
MYOZ3	Q9H8M7		hsa-miR-1248	0.182087	8	High	CoMeTa|DIANA|ElMMo3|MirAncesTar|miRDB|MirMAP|RNAhybrid|TargetSpy
MINDY3	O15391		hsa-miR-1248	0.182059	8	High	DIANA|ElMMo3|MBStar|MirAncesTar|miRDB|MirMAP|MirTar|Mirza-G
YY2	Q9P1W3		hsa-miR-1248	0.18197	7	High	DIANA|ElMMo3|MBStar|MirAncesTar|MirMAP|MirSNP|RepTar
TMEM63C	O94806		hsa-miR-1248	0.181864	5	High	BiTargeting|CoMeTa|MBStar|MirAncesTar|MirMAP
PRKD3	Q96JK2		hsa-miR-1248	0.181859	10	High	BiTargeting|DIANA|ElMMo3|MirAncesTar|miRDB|MirMAP|Mirza-G|RepTar|RNAhybrid|TargetSpy
DCAF5	Q6ZMQ8		hsa-miR-1248	0.181842	8	High	BiTargeting|DIANA|ElMMo3|MirAncesTar|MirMAP|PACCMIT|RepTar|RNAhybrid
AATK	P05230		hsa-miR-1248	0.181819	7	High	CoMeTa|DIANA|MBStar|MirAncesTar|MirMAP|Mirza-G|RNAhybrid
FGF1	P11277		hsa-miR-1248	0.181809	8	High	BiTargeting|CoMeTa|DIANA|MBStar|MirAncesTar|MirMAP|RepTar|RNAhybrid
SPTB	O14525		hsa-miR-1248	0.181795	8	High	CoMeTa|MBStar|MirAncesTar|MirMAP|Mirza-G|RepTar|RNA22|RNAhybrid
ASTN1	Q86UP9		hsa-miR-1248	0.181745	8	High	DIANA|ElMMo3|MBStar|MirAncesTar|miRDB|MirMAP|Mirza-G|RNAhybrid
LHFPL3	P05114		hsa-miR-1248	0.181728	8	High	DIANA|ElMMo3|MirAncesTar|miRDB|MirMAP|MirSNP|Mirza-G|RNAhybrid
HMGN1	P54687		hsa-miR-1248	0.181709	9	High	DIANA|ElMMo3|MBStar|MirAncesTar|miRDB|MirMAP|MirSNP|RNAhybrid|TargetSpy
BCAT1	P14859		hsa-miR-1248	0.181675	10	High	BiTargeting|DIANA|ElMMo3|MBStar|MirAncesTar|miRDB|MirMAP|Mirza-G|RNA22|RNAhybrid
POU2F1	P10275		hsa-miR-1248	0.181665	7	High	DIANA|MBStar|MirAncesTar|miRDB|MirMAP|MirTar|RNAhybrid
AR	Q9NWQ8		hsa-miR-1248	0.181632	8	High	ElMMo3|MBStar|MirAncesTar|miRDB|MirSNP|Mirza-G|RepTar|TargetSpy
PAG1	Q9H8Y8		hsa-miR-1248	0.181482	6	High	CoMeTa|ElMMo3|MBStar|MirAncesTar|MirMAP|RNAhybrid
GORASP2	Q71H61		hsa-miR-1248	0.181408	10	High	DIANA|ElMMo3|MBStar|MirAncesTar|miRDB|MirMAP|MirSNP|Mirza-G|RNA22|RNAhybrid
ILDR2	Q8TBZ5		hsa-miR-1248	0.181251	10	High	DIANA|ElMMo3|MBStar|MirAncesTar|miRDB|MirMAP|MirSNP|Mirza-G|RNAhybrid|TargetSpy
ZNF502	P49069		hsa-miR-1248	0.181216	6	High	BiTargeting|CoMeTa|MirAncesTar|MirMAP|RepTar|RNAhybrid
CAMLG	Q15858		hsa-miR-1248	0.181156	10	High	BiTargeting|DIANA|ElMMo3|MBStar|MirAncesTar|miRDB|MirMAP|Mirza-G|RepTar|TargetSpy
SCN9A	P35611		hsa-miR-1248	0.181134	6	High	BiTargeting|CoMeTa|DIANA|MirAncesTar|MirMAP|RNAhybrid
ADD1	Q6PKH6		hsa-miR-1248	0.181115	10	High	DIANA|ElMMo3|MBStar|MirAncesTar|miRDB|MirMAP|MirSNP|Mirza-G|RepTar|RNAhybrid
DHRS4L2	Q16394		hsa-miR-1248	0.181115	8	High	BiTargeting|DIANA|ElMMo3|MirAncesTar|miRDB|MirMAP|PACCMIT|RNAhybrid
EXT1	Q08426		hsa-miR-1248	0.181034	8	High	DIANA|ElMMo3|MirAncesTar|miRDB|MirMAP|Mirza-G|RNAhybrid|TargetSpy
EHHADH
